# Supplementary material
Source: PubMed Central journal article supplement (PMC2799536)
Supplement: NIHMS103534-supplement-a.pdf [file NIHMS103534-supplement-a.pdf]

**Supplementary Table 1:** Sequences of all pre-amplification and qPCR primers. F and R are forward and reverse primers of qPCR, which are nested between OF and OR, the outer primers used for pre-amplification. In semi-nested assays, F or R is used accordingly for the pre-amplification together with one outer primer. T7F and T7R are the primers used to generate the IVT RNA standards. The GAPDH IVT primers did not work and therefore were not reported.

| Assay    | F of qPCR                    | R of qPCR                         | OF                           | OR                             | Assay use             |
|----------|------------------------------|-----------------------------------|------------------------------|--------------------------------|-----------------------|
| CSTA     | AAAACCTCAAGTTGTGCTGGAA       | TCACCTGCTCGTACCTTAATG             | F                            | TGTCGGGGAAGACTTTTGAATA         | SIR candidate         |
| ANXA2    | TCCTGTACTATTATCGAGCAA        | TTCTGGTAGTCGCCCTTAGTGT            | AATTCAAGAGAAAAGTAGGGCAAG     | R                              | SIR candidate         |
| RPS6     | GAAGAGGCTCAGAAATGCTAA        | CGCTTCCTTAGCCTCCTT                | F                            | GTCTCTCGCAATTTGTTCCTG          | SIR candidate         |
| RPS7     | GACAAAGCACAGCAGAACAATG       | CACCAAGAAAAGTTCAACCTTG            | F                            | CTTGCCCGTGAGCTTCTTATAG         | SIR candidate         |
| RPS10    | CTGGGTCAGCAACCGAAT           | CCAAATCCGCCTCTAAACTG              | F                            | AATGCAAAAAGAACTCTCTCCAA        | SIR candidate         |
| RPS16    | CCTGGTGGCATTACCAGA           | CTTTGATCTCCTCTTGGGAAGC            | ATGCTATCCGTCAGTCCATCTC       | R                              | SIR candidate         |
| RPL37    | GAATACCACCGAACTGGTC          | GAATCCATGCCTGAATCTGC              | F                            | GTTTAGGTGTGTCTCTCACG           | SIR candidate         |
| ACTB     | CCCAGCACAATGAAGATCAA         | TTGCCTCAGGAGGACCAATG              | F                            | CGATCCACACGGAGATCTTG           | SIR candidate         |
| S100A8   | GCTAGAGACCAGGTGTCTCA         | GTCTGCACCCTTTTCTCTGA              | ATGCCGTCTACAGGGATGAC         | R                              | SIR candidate         |
| GAPDH    | TCACCAGGGCTCTTTAACTC         | GTCTCAGCCTTGACGGTG                | TCAACGGATTTGGTCTATTGG        | R                              | SIR candidate         |
| ANXA2    | GAGAAAGTACGCAAGTCCCTGTA      | CACAGGTACAGCAGCGCTTTC             | AGGTCTGAATTCAGAGAAAGTACGG    | CGGGCTTCAGTCATCTCCAC           | selected SIR          |
| DUSP1    | CAGACATCAGCTCTGGTTCAA        | CAAAACCCCTTCTCCAGCAT              | CCTGTGGAGGACAACCACAAG        | GCCTGGCAGTGGACAACA             | oc marker             |
| H3F3A    | CGCTTCAGAGCGCAGCTAT          | TCCTCAAAAAGGCCAGCAATG             | AGCAGCTGGTGCAGAAAT           | GCACACAGGTTGGTCTTCAA           | oc marker             |
| IL1B     | TGTGAAAGATGATAAGCCCACTCT     | CAAAATCGCTTTCCACTTCTTCT           | GTACCTGTCTGGCTGTGAAAG        | TTCTATCTTGTGAAAGACAAATCGCTT    | oc marker             |
| IL8      | CCAAGGAAAACCTGGTGACAG        | CTTGGATACCAAGAGAAATGAATTTT        | TTTCTGATGGAAGAGCTCTGTCT      | ATCTTCACTGATTCTGGATACCACA      | oc marker             |
| OAZ1     | TCTTCATTGCTCCACAAGAAC        | TCAAAGCCCAAAAAGCTGAAG             | TGGAGCCGACCAATGTC            | CCCCGGTCTCAACAATCTCAA          | oc marker             |
| RPL37    | ACTGGTGAATGAGGCACTAA         | GGTTTAGGTGTGTTCTCTCACG            | ATACCAACCGAACTGGTCGAA        | AACAGCTGCCCTCTGGGTT            | selected SIR          |
| S100A8   | TGCTAGAGACCAGGTGTCTCAG       | CATCAGTGTGATATCCAATCTTTGA         | CATGCCGTCTACAGGGATGAC        | AAGTTAACTGCACCATCAGTGTGATAT    | selected SIR          |
| S100P    | GCTGATGGAGGAGGAGCTACCA       | TTGAGCAATTTATCCACGGCAT            | GCACGGACACCCCTGACCA          | CGTCCAGGCTCTGAGCAATT           | oc marker             |
| SAT      | TTGGCATAGGATCAGAAATCTGAA     | TCTGTACCAAGAAGTGCATGCT            | CGTGATGAGTATTATAGAGGCTTTG    | GGTTCATTCCATTCTGTACCAA         | oc marker             |
| ANXA1    | GGTCTCAAGCTATGATCAGAAAGACTTT | GAAAGAACTTCTTATTAAGCTTATAGGATG    | CATTCCCTTATGATGGTCTCAAGC     | GCATGTAGGTAGCTACACTGTAATCTG    | Exon array candidates |
| ARF5     | AAGCCCCCTTCTCCAGA            | CCCTGAGATACACCCAAAACAGA           | CCTGTGGGACCTATGGAAG          | ACCCGAAGCCCTCACTT              | Exon array candidates |
| B2M      | GGGGAAAATTTAGAAATATAATTGACAG | GAATCTTATATGACAAAATGTTTCATTCATT   | GCTTAGAATTTGGGGAAAATTTAG     | CCACAACCATGCCCTACTTTATCA       | Exon array candidates |
| CRNN     | CCAAATCCAGTGGGTGCATC         | AAAGACCTAAAAGGGAAGCTGCATA         | GAGTITGGCTTGTCTCCTGATG       | AGTTCCAGATAGAAAGCTCTCTGC       | Exon array candidates |
| CSNB     | AAGCTTCACTCCGGGCTGT          | AAAAGCAGCTGCAGAAATCTCTG           | AGAGCGTGCAGTTGTGATCCTA       | GAAGGAAAGAAAATCAACACAATGAAA    | Exon array candidates |
| CXCL1    | CCAAGCAATGAGGCAATGA          | TAAACAGTTACAAAACAGATGTGCACA       | TGGCGGATCCAAAGCAAT           | TTGACCACACACTGTGAAATCATT       | Exon array candidates |
| EGR1     | GGTTCCTCAGAAATGTAAGAAAACAAA  | CAGTTAAAAAATAGACTTTTGAAGATTGACA   | GAGCTTCGGTTCTCCAGAATGT       | AAAAATCCGCCCTACTCAG            | Exon array candidates |
| EIF1A1   | ATTTGGCCATCATCAACCAA         | TCAGTTGCTTTCAGAAAATCAACACT        | TACAGTTGGGATTTGGCCATC        | GGTAATTCAGTTCCTCAGCTTTTAA      | Exon array candidates |
| FOS      | CCATGAAACGTTTATTTAGTGTITTT   | GACCTCAAAGGTAGAAAATAAATAAATAA     | GATCATGCTATTGTGAGGTGTT       | CATTCAAAATTCATTCTCCACATGC      | Exon array candidates |
| G0S2     | CGCTGGGAGAGTGCAGGA           | TCAGCGGTTTCTGTAAGTTAAGTC          | CCTGACTCCGCTGGGAGA           | GATGCTTGTGGTAGTCACTTCTAGAT     | Exon array candidates |
| IER3     | TTAAGTTATGCAAGGTTGAGATG      | CCACAAGCTCAATAAATACCAAGAG         | CGTCTCTAGGTGATGGAGAT         | GGTGTCTGCTTCCACCATG            | Exon array candidates |
| IL1B     | GCCCAATCCCAAGCCCTT           | GGGCTTAAAGTGAGTAGGAGGGTG          | TCTCTCTTTCAGGGCCAATC         | ATGTGGCCGTTGGTTCTGTC           | Exon array candidates |
| IL1RN    | CTACGCAATGTGCTCCTG           | CTACAATGTCGAAGGCAATTTATTC         | TAGCTCTCCAAGGCTCTGAG         | AGGCCACAGCCATCTTTCATACA        | Exon array candidates |
| ITGB2    | GGCCGGGCTGCTCTGG             | CCTCCTCAAGTCTCCATGCAA             | CCAGTTATTTCCGCCCTCAA         | CCTAACCTCACCACCTCAAGC          | Exon array candidates |
| IVNS1ABP | CTAGAAATGAATGGAAGATGATGGG    | TGGTGTCCCTACAGTTGCAATC            | CATGCCATCAGTTGTGGA           | ATCCTCCCACTGCATAAATGTT         | Exon array candidates |
| KRT4     | CCTCTCACCTCCCATGGACA         | AGGGACATATGTACCCCAATAA            | CACCTGGAATGGGAAGGATG         | TCTAGTGGGAGATGGCATTGG          | Exon array candidates |
| MT-ND1   | CAAACTCAAACCTAGCCCTGATC      | GACTTCATATGAGATTTGTTGGGCTA        | CTGATCAGGGTGAAGCATCAAC       | TGGAGAGGTTAAAGGAGCCACT         | Exon array candidates |
| MT-ND3   | CGCGTCCCTTCTCCATAAA          | AGGAGGGCAATTTCTAGATCAAATAA        | CGGCTTCGACCTTATATCCC         | GTTAGTTGTTGTAGGGCTCATGGT       | Exon array candidates |
| MT-ND4   | GAACTATCAAACCTCCTGAGCCAAACA  | GAGGTATCTTACTATAAAAGCTATTGTGTAAGC | GGCTCACTAAACATCTACTACTACTCTC | GGAGTCCGTAAGAGGATATCTTACTATAAA | Exon array candidates |
| MT-ND5   | GGCTGAGAGGGCCGTAGAA          | GCATCTGCTCGGGGCTAT                | CCAACCTGTTATCGGGCTGAGA       | CGCCGATACGGTTGTATAGGA          | Exon array candidates |
| MUC7     | TTGGATCCTACAGAGATAGCCACTG    | GATGGCCCATACAATATTCTCTCTT         | TCCCACAAGCCAGATGCGAG         | TCAGGGAAAAGTAAATGGTTGATG       | Exon array candidates |
| PI3      | TCCGTTAAAGGACAAGTTTTCAG      | AGTGGAGACTGGACCTTTGACTG           | AAAGGCCGTGTTCCATTCAA         | GCAGCAGGATCAAGATAAT            | Exon array candidates |
| PRB4     | CAGCCTCCCAAGTAAATCAGGAT      | CGGCATTTGTAGCAATGAATTAAT          | AGACCTGCACAGGGACAAC          | AGCTATGATGACCTTGTTCACATG       | Exon array candidates |
| RNR2     | CCTCCGAGCAGTACATGCTAAGA      | CCGTTGGTCAAGTTATGGATTA            | GCAGAACCCAACCTCCGA           | GGTAACTTGTTCGCTTGGTCAAG        | Exon array candidates |
| RPS4Y1   | AGCTTGGCCACGAGGCTTT          | CAGGGAATCAAAGTGTATTTCG            | TGATGTGGTGCATGTGAAGGA        | CTCTCTCAGCAACAGTAAGTCGAA       | Exon array candidates |
| S100A14  | GGAGCTCATGGGTGAGGA           | ATCCCTGGCCCAACCAAT                | TGTGCACTGTCTTGGATGCT         | TCCCCCTACTACCAATCTTTGG         | Exon array candidates |
| SAT      | TGCATGTTGAATGAGGTCTGT        | AAGATCTGACTCTCAAACCTGCATC         | TGGCGTTGTGCATGTTTG           | ACCACCTGTTGTTTATCGAAAGAT       | Exon array candidates |
| SPRR1A   | ATAATCGCTCTTTGCACTCT         | CTCAGGAGCCCTCCGAATG               | GCTGTCAACCTGAAATCATACTG      | GACGTTACGCTTACGACAG            | Exon array candidates |
| SPRR2A   | GGAGACTGAGCAAGGAAAGTCC       | CTGCTCTTCTCCGAAAGTCT              | CTGTCCAGGTGGAGACTGAGC        | TCTCTGATGGTTCCAGGGA            | Exon array candidates |
| SPRR3    | GCCATAGTCTCTCTTATTTGATCTCTAA | ACAGGATCTCAGAGTGTGTGTGA           | CCCAAGCCATAGTCTCTCTTATTT     | CGAAGACCAGAAAAGCCATGA          | Exon array candidates |

|        | T7F                                        | T7R                    |
|--------|--------------------------------------------|------------------------|
| CSTA   | CTAATACGACTCACTATAGGGacgaaaaattggaagctgtg  | cicattttccgggaagac     |
| ANXA2  | CTAATACGACTCACTATAGGGaatcatggtctcccgact    | acaggtacagcagcgcttc    |
| RPS6   | CTAATACGACTCACTATAGGGtgcctctgaagaagcagcgtg | agaagctcgcagagggaaa    |
| RPS7   | CTAATACGACTCACTATAGGGcaagagaatccgctcaaac   | attacatcctgcccgtga     |
| RPS10  | CTAATACGACTCACTATAGGGactctggtccgacaagaaa   | aatgcaaaaagaatctctccaa |
| RPS16  | CTAATACGACTCACTATAGGGgtgctcgtgtaaggggtgtg  | ccgctcactggtatgaga     |
| RPL37  | CTAATACGACTCACTATAGGGgcccagcgcgaagaaagt    | gcccctgttggtaggtg      |
| ACTB   | CTAATACGACTCACTATAGGGtccctggagaagactacga   | aaagccatgccaalctc      |
| S100A8 | CTAATACGACTCACTATAGGGatttccatgctctacagg    | cctggaagttaactgacat    |
| GAPDH  |                                            |                        |
