# Supplementary material
Source: PubMed Central journal article supplement (PMC2799536)
Supplement: NIHMS103534-supplement-b.pdf [file NIHMS103534-supplement-b.pdf]

**Supplementary Table 2: Raw data supporting Figure 3A, C and D.**

Figure 3A:

| Input relative Qty | Ct ANXA 2 | Ct B-Act | Ct CSTA | Ct GAPDH    | Ct RPL 37 | Ct RPS 10 | Ct RPS 16 | Ct RPS 6            | Ct RPS 7 | Ct S100A8 |
|--------------------|-----------|----------|---------|-------------|-----------|-----------|-----------|---------------------|----------|-----------|
| 16384              | 17.8      | 21.02    | 19.86   | 28.7        | 20.76     | 19.3      | 19.83     | 18.65               | 20.69    | 18.46     |
| 16384              | 17.69     | 21.14    | 19.98   | 28.37       | 20.81     | 19.28     | 19.71     | 18.44               | 20.57    | 18.44     |
| 4096               | 19.69     | 23.08    | 21.68   | 29.75       | 23.13     | 21.14     | 21.85     | 20.27               | 22.77    | 20.27     |
| 4096               | 20.05     | 23.17    | 21.62   | 30.3        | 22.79     | 21.27     | 21.85     | 20.34               | 22.71    | 20.23     |
| 1024               | 22.32     | 25.64    | 24.72   | 33.19       | 24.95     | 24.01     | 24.14     | 22.57               | 25.27    | 23.21     |
| 1024               | 22.42     | 25.56    | 24.55   | 33.02       | 24.89     | 23.98     | 24.13     | 22.69               | 25.12    | 23.25     |
| 256                | 23.91     | 27.1     | 25.94   | Undetermin  | 26.24     | 25.35     | 25.76     | secondary melt peak | 26.9     | 24.81     |
| 256                | 24.02     | 27.07    | 26.09   | 34.61       | 26.74     | 25.4      | 26.09     |                     | 26.89    | 24.74     |
| 64                 | 25.57     | 28.32    | 27.85   | Undetermin  | 28.97     | 27.13     | 27.67     | secondary melt peak | 28.76    | 26.32     |
| 64                 | 25.64     | 28.9     | 27.64   | 33.79       | 28.59     | 27.69     | 27.56     |                     | 28.57    | 26.28     |
| 16                 | 27.51     | 29.49    | 30.68   | 39.76       | 30.55     | 29.54     | 30.42     | secondary melt peak | 31.57    | 28.42     |
| 16                 | 27.34     | 29.95    | 30.1    | Undetermine | 31.1      | 28.85     | 30.16     |                     | 30.76    | 28.56     |
| 4                  | 30.07     | 31.95    | 32.4    | Undetermine | 33.46     | 31.59     | 32.58     | secondary melt peak |          | 30.42     |
| 4                  | 30.42     | 31.18    | 32      | Undetermine | 33.95     | 31.4      | 32.42     |                     |          | 30.12     |

|           |        |        |       |        |        |       |        |       |       |       |
|-----------|--------|--------|-------|--------|--------|-------|--------|-------|-------|-------|
| slope     | -3.29  | -3.30  | -3.32 | Failed | -3.24  | -3.39 | -3.28  | -3.39 | -3.36 | -3.36 |
| RSQ       | 0.991  | 0.992  | 0.985 | 0.952  | 0.994  | 0.989 | 0.996  | 0.992 | 0.994 | 0.996 |
| eff       | 101.3% | 101.0% | 99.9% |        | 103.4% | 97.2% | 101.7% | 97.1% | 98.5% | 98.5% |
| intercept | 31.82  | 35.11  | 34.00 | 44.27  | 34.55  | 33.66 | 33.74  | 32.75 | 34.94 | 32.56 |

Figure 3C:

| Sample Name | Assay | cycle number | Universal RNA input conc (ng) | Ct    |
|-------------|-------|--------------|-------------------------------|-------|
| 1/40        | ANXA2 | 5            | 25                            | 19.47 |
| 1/160       | ANXA2 | 5            | 6.25                          | 21.19 |
| 1/640       | ANXA2 | 5            | 1.5625                        | 22.16 |
| 1/2560      | ANXA2 | 5            | 0.390625                      | 26.7  |
| 1/10240     | ANXA2 | 5            | 0.0976563                     | 28.76 |
| 1/40        | ANXA2 | 14           | 25                            | 10.39 |
| 1/160       | ANXA2 | 14           | 6.25                          | 12.79 |
| 1/640       | ANXA2 | 14           | 1.5625                        | 15.22 |
| 1/2560      | ANXA2 | 14           | 0.390625                      | 17.69 |
| 1/10240     | ANXA2 | 14           | 0.0976563                     | 20.1  |
| 1/40        | ANXA2 | 20           | 25                            | 5.38  |
| 1/160       | ANXA2 | 20           | 6.25                          | 7.3   |
| 1/640       | ANXA2 | 20           | 1.5625                        | 9.33  |
| 1/2560      | ANXA2 | 20           | 0.390625                      | 12.17 |
| 1/10240     | ANXA2 | 20           | 0.0976563                     | 14.51 |

Figure 3D:

| Sample Name | Assay  | cycle number | Universal RNA input conc (ng) | Ct    |
|-------------|--------|--------------|-------------------------------|-------|
| 1/40        | S100A8 | 5            | 25                            | 20.86 |
| 1/160       | S100A8 | 5            | 6.25                          | 22.31 |
| 1/640       | S100A8 | 5            | 1.5625                        | 23.52 |
| 1/2560      | S100A8 | 5            | 0.390625                      | 27.77 |
| 1/10240     | S100A8 | 5            | 0.0976563                     | 30.45 |
| 1/40        | S100A8 | 14           | 25                            | 11.83 |
| 1/160       | S100A8 | 14           | 6.25                          | 13.85 |
| 1/640       | S100A8 | 14           | 1.5625                        | 16.11 |
| 1/2560      | S100A8 | 14           | 0.390625                      | 19.04 |
| 1/10240     | S100A8 | 14           | 0.0976563                     | 21.88 |
| 1/40        | S100A8 | 20           | 25                            | 6.43  |
| 1/160       | S100A8 | 20           | 6.25                          | 8.41  |
| 1/640       | S100A8 | 20           | 1.5625                        | 10.23 |
| 1/2560      | S100A8 | 20           | 0.390625                      | 13.19 |
| 1/10240     | S100A8 | 20           | 0.0976563                     | 16.02 |
