# Supplementary material
Source: PubMed Central journal article supplement (PMC2799536)
Supplement: NIHMS103534-supplement-d.pdf [file NIHMS103534-supplement-d.pdf]

| Probe Set ID | Transcript Cluster ID | Probe Set Start | Probe Set Stop | Chromosome | Strand | Transcript ID(Annotated) | UniGene Symbol | Description                                                                    |
|--------------|-----------------------|-----------------|----------------|------------|--------|--------------------------|----------------|--------------------------------------------------------------------------------|
| 2318365      | 2318364               | 6562722         | 6562755        | 1          | +      | NM_005341                | ZBTB48         | Zinc finger and BTB domain containing 48                                       |
| 2318654      | 2318637               | 7763981         | 7764044        | 1          | +      | NM_004781                | VAMP3          | Vesicle-associated membrane protein 3 (cellubrevin)                            |
| 2318755      | 2318736               | 7967797         | 7967892        | 1          | +      | AK091679                 | PARK7          | Parkinson disease (autosomal recessive, early onset) 7                         |
| 2320754      | 2320727               | 12191829        | 12191854       | 1          | +      | NM_001066                | TNFRSF1B       | Tumor necrosis factor receptor superfamily, member 1B                          |
| 2321789      | 2321779               | 15627873        | 15628070       | 1          | +      | NM_024329                | EFHD2          | EF-hand domain family, member D2                                               |
| 2323747      | 2323743               | 19807562        | 19807587       | 1          | +      | NM_005617                | RPS14          | Ribosomal protein S14                                                          |
| 2323749      | 2323743               | 19807642        | 19807691       | 1          | +      | NM_005617                | RPS14          | Ribosomal protein S14                                                          |
| 2324120      | 2324097               | 20850223        | 20850367       | 1          | +      | NM_032409                | PINK1          | PTEN induced putative kinase 1                                                 |
| 2325200      | 2325192               | 23893737        | 23893811       | 1          | +      | ENST00000374550          | RPL11          | Ribosomal protein L11                                                          |
| 2325203      | 2325192               | 23894882        | 23894964       | 1          | +      | ENST00000374550          | RPL11          | Ribosomal protein L11                                                          |
| 2325206      | 2325192               | 23895451        | 23895481       | 1          | +      | NM_000975                | RPL11          | Ribosomal protein L11                                                          |
| 2325808      | 2325781               | 25559752        | 25559783       | 1          | +      | CR596941                 | TMEM50A        | Transmembrane protein 50A                                                      |
| 2325961      | 2325941               | 25559752        | 25559783       | 1          | +      | CR596941                 | TMEM50A        | Transmembrane protein 50A                                                      |
| 2326458      | 2326448               | 26480293        | 26480587       | 1          | +      | AF247790                 | SH3BGL3        | SH3 domain binding glutamic acid-rich protein like 3                           |
| 2327377      | 2327375               | 28435286        | 28435337       | 1          | +      | NM_016311                | ATPIF1         | ATPase inhibitory factor 1                                                     |
| 2327384      | 2327375               | 28436935        | 28437058       | 1          | +      | NM_178190                | ATPIF1         | ATPase inhibitory factor 1                                                     |
| 2328941      | 2328936               | 32709212        | 32709277       | 1          | +      | XM_001131675             |                | PREDICTED: Homo sapiens zinc finger and BTB domain containing 8 (ZBTB8), mRNA. |
| 2330005      | 2330002               | 36046499        | 36046538       | 1          | +      | NM_017629                | EIF2C4         | Eukaryotic translation initiation factor 2C, 4                                 |
| 2331220      | 2331213               | 39322545        | 39322581       | 1          | +      | NM_012090                | MACF1          | Microtubule-actin crosslinking factor 1                                        |
| 2332694      | 2332664               | 42939145        | 42939227       | 1          | +      | CR601484                 | LOC646531      | Similar to nuclease sensitive element binding protein 1                        |
| 2332695      | 2332664               | 42939274        | 42939304       | 1          | +      | CR601484                 | LOC646531      | Similar to nuclease sensitive element binding protein 1                        |

|         |         |           |           |     |                    |           |                                                                       |
|---------|---------|-----------|-----------|-----|--------------------|-----------|-----------------------------------------------------------------------|
| 2332697 | 2332664 | 42940299  | 42940387  | 1 + | NM_004559          | YBX1      | Y box binding protein 1                                               |
| 2333577 | 2333574 | 44171991  | 44172018  | 1 + | NM_057091          | ARTN      | Artemin                                                               |
| 2334176 | 2334163 | 45015005  | 45015031  | 1 + | XM_931016          | LOC388076 | Similar to ribosomal protein S8                                       |
| 2334179 | 2334163 | 45015876  | 45015987  | 1 + | CR616485           | LOC728553 | Similar to ribosomal protein S8                                       |
| 2334180 | 2334163 | 45015997  | 45016047  | 1 + | AB062401           | RPS8      | Ribosomal protein S8                                                  |
| 2334189 | 2334163 | 45016835  | 45016912  | 1 + | NM_001012          | RPS8      | Ribosomal protein S8                                                  |
| 2340849 | 2340845 | 67163303  | 67163351  | 1 + | BC108726           | MIER1     | Mesoderm induction early response 1 homolog ( <i>Xenopus laevis</i> ) |
| 2340958 | 2340930 | 67497947  | 67498115  | 1 + | NM_144701          | IL23R     | Interleukin 23 receptor                                               |
| 2346894 | 2346863 | 93074346  | 93074371  | 1 + | NM_000969          | RPL5      | Ribosomal protein L5                                                  |
| 2346895 | 2346863 | 93074423  | 93074517  | 1 + | NM_000969          | RPL5      | Ribosomal protein L5                                                  |
| 2346900 | 2346863 | 93075651  | 93075680  | 1 + | NM_000969          | RPL5      | Ribosomal protein L5                                                  |
| 2346906 | 2346863 | 93078720  | 93078753  | 1 + | NM_000969          | RPL5      | Ribosomal protein L5                                                  |
| 2346911 | 2346863 | 93079938  | 93079971  | 1 + | NM_000969          | RPL5      | Ribosomal protein L5                                                  |
| 2349435 | 2349402 | 103923486 | 103923528 | 1 + | AK127047           | AMY1A     | Amylase, alpha 1A; salivary                                           |
| 2349511 | 2349483 | 104008506 | 104008648 | 1 + | ENSESTT00000033130 |           |                                                                       |
| 2350003 | 2350000 | 107849636 | 107849737 | 1 + | ENSESTT00000005997 |           |                                                                       |
| 2352269 | 2352228 | 113015689 | 113015722 | 1 + | NM_006135          | CAPZA1    | Capping protein (actin filament) muscle Z-line, alpha 1               |
| 2356123 | 2356115 | 144151169 | 144151277 | 1 + | NM_006472          | TXNIP     | Thioredoxin interacting protein                                       |
| 2356125 | 2356115 | 144151436 | 144151486 | 1 + | NM_006472          | TXNIP     | Thioredoxin interacting protein                                       |
| 2356127 | 2356115 | 144151637 | 144151798 | 1 + | NM_006472          | TXNIP     | Thioredoxin interacting protein                                       |
| 2356128 | 2356115 | 144151825 | 144151876 | 1 + | BX537824           | TXNIP     | Thioredoxin interacting protein                                       |
| 2356132 | 2356115 | 144152265 | 144152408 | 1 + | BC024305           | TXNIP     | Thioredoxin interacting protein                                       |
| 2356137 | 2356115 | 144153737 | 144153838 | 1 + | NM_006472          | TXNIP     | Thioredoxin interacting protein                                       |
| 2356983 | 2356979 | 145847014 | 145847095 | 1 + | NM_005267          | GJA8      | Gap junction protein, alpha 8, 50kDa (connexin 50)                    |
| 2358359 | 2358320 | 148746528 | 148746653 | 1 + | NM_025150          | TARSL1    | Threonyl-tRNA synthetase-like 1                                       |
| 2358850 | 2358821 | 149506478 | 149506511 | 1 + | BC002365           | PSMD4     | Proteasome (prosome, macropain) 26S subunit, non-ATPase, 4            |
| 2359306 | 2359302 | 150754884 | 150755027 | 1 + | NM_019060          | C1orf42   | Chromosome 1 open reading frame 42                                    |
| 2359497 | 2359492 | 151224545 | 151224596 | 1 + | NM_005987          | SPRR1A    | Small proline-rich protein 1A                                         |
| 2359498 | 2359492 | 151224630 | 151224841 | 1 + | NM_005987          | SPRR1A    | Small proline-rich protein 1A                                         |

|         |         |           |           |   |   |                    |               |                                                                               |
|---------|---------|-----------|-----------|---|---|--------------------|---------------|-------------------------------------------------------------------------------|
| 2359511 | 2359504 | 151242348 | 151242378 | 1 | + | NM_005416          | SPRR3         | Small proline-rich protein 3                                                  |
| 2359512 | 2359504 | 151242456 | 151242592 | 1 | + | NM_005416          | SPRR3         | Small proline-rich protein 3                                                  |
| 2359513 | 2359504 | 151242700 | 151242896 | 1 | + | NM_005416          | SPRR3         | Small proline-rich protein 3                                                  |
| 2359525 | 2359521 | 151271596 | 151271649 | 1 | + | NM_003125          | SPRR1B        | Small proline-rich protein 1B (cornifin)                                      |
| 2359666 | 2359664 | 151597397 | 151597523 | 1 | + | NM_002965          | S100A9        | S100 calcium binding protein A9                                               |
| 2359667 | 2359664 | 151599802 | 151599871 | 1 | + | NM_002965          | S100A9        | S100 calcium binding protein A9                                               |
| 2359668 | 2359664 | 151599893 | 151599920 | 1 | + | NM_002965          | S100A9        | S100 calcium binding protein A9                                               |
| 2359670 | 2359664 | 151600050 | 151600083 | 1 | + | NM_002965          | S100A9        | S100 calcium binding protein A9                                               |
| 2362337 | 2362333 | 157078637 | 157078793 | 1 | + | ENSESTT00000053469 | MNDA          | Myeloid cell nuclear differentiation antigen                                  |
| 2362343 | 2362333 | 157084304 | 157084330 | 1 | + | NM_002432          | MNDA          | Myeloid cell nuclear differentiation antigen                                  |
| 2362347 | 2362333 | 157085865 | 157085895 | 1 | + | NM_002432          | MNDA          | Myeloid cell nuclear differentiation antigen                                  |
| 2362938 | 2362892 | 158376307 | 158376339 | 1 | + | NM_000702          | ATP1A2        | ATPase, Na <sup>+</sup> /K <sup>+</sup> transporting, alpha 2 (+) polypeptide |
| 2363441 | 2363424 | 159395176 | 159395201 | 1 | + | NM_016406          | UFC1          | Ubiquitin-fold modifier conjugating enzyme 1                                  |
| 2368849 | 2368840 | 175465581 | 175465611 | 1 | + | NM_021165          | FAM5B         | Family with sequence similarity 5, member B                                   |
| 2371049 | 2370991 | 181122896 | 181122937 | 1 | + | NM_001357          | DHX9          | DEAH (Asp-Glu-Ala-His) box polypeptide 9                                      |
| 2372876 | 2372858 | 191046739 | 191046877 | 1 | + | NM_002923          | RGS2          | Regulator of G-protein signalling 2, 24kDa                                    |
| 2372878 | 2372858 | 191047200 | 191047307 | 1 | + | NM_002923          | RGS2          | Regulator of G-protein signalling 2, 24kDa                                    |
| 2372879 | 2372858 | 191047443 | 191047950 | 1 | + | NM_002923          | RGS2          | Regulator of G-protein signalling 2, 24kDa                                    |
| 2374584 | 2374544 | 199454287 | 199454312 | 1 | + | AL137493           | DKFZp434B1231 | EEF1A2 binding protein                                                        |
| 2375052 | 2375038 | 200358753 | 200358784 | 1 | + | NM_004767          | GPR37L1       | G protein-coupled receptor 37 like 1                                          |
| 2375673 | 2375664 | 201543813 | 201544454 | 1 | + | NM_006763          | BTG2          | BTG family, member 2                                                          |
| 2375674 | 2375664 | 201545069 | 201545202 | 1 | + | NM_006763          | BTG2          | BTG family, member 2                                                          |
| 2375675 | 2375664 | 201545254 | 201545327 | 1 | + | NM_006763          | BTG2          | BTG family, member 2                                                          |
| 2378075 | 2378068 | 207916054 | 207916174 | 1 | + | NM_015714          | G0S2          | G0/G1switch 2                                                                 |

|         |         |           |           |   |   |              |           |                                                       |
|---------|---------|-----------|-----------|---|---|--------------|-----------|-------------------------------------------------------|
| 2378076 | 2378068 | 207916190 | 207916321 | 1 | + | NM_015714    | G0S2      | G0/G1switch 2                                         |
| 2383071 | 2383062 | 224319988 | 224320125 | 1 | + | XM_293312    | LOC347376 | Similar to H3 histone, family 3B                      |
| 2383075 | 2383062 | 224325677 | 224325718 | 1 | + | XM_930111    | LOC644914 | Similar to H3 histone, family 3B                      |
| 2383076 | 2383062 | 224325722 | 224325759 | 1 | + | XM_930111    | LOC644914 | Similar to H3 histone, family 3B                      |
| 2383077 | 2383062 | 224325763 | 224325795 | 1 | + | XM_930111    | LOC644914 | Similar to H3 histone, family 3B                      |
| 2383078 | 2383062 | 224325928 | 224325954 | 1 | + | XM_930111    | LOC644914 | Similar to H3 histone, family 3B                      |
| 2383079 | 2383062 | 224326182 | 224326207 | 1 | + | XM_930111    | LOC644914 | Similar to H3 histone, family 3B                      |
| 2383080 | 2383062 | 224326280 | 224326315 | 1 | + | XM_930111    | LOC644914 | Similar to H3 histone, family 3B                      |
| 2383768 | 2383726 | 226353196 | 226353421 | 1 | + | NM_001024226 | ARF1      | ADP-ribosylation factor 1                             |
| 2383769 | 2383726 | 226353473 | 226353504 | 1 | + | NM_001024226 | ARF1      | ADP-ribosylation factor 1                             |
| 2383882 | 2383859 | 226401765 | 226401865 | 1 | + | AK124677     | GUK1      | Guanylate kinase 1                                    |
| 2383890 | 2383859 | 226402714 | 226402747 | 1 | + | AK124677     | GUK1      | Guanylate kinase 1                                    |
| 2383895 | 2383859 | 226403025 | 226403141 | 1 | + | AK124677     | GUK1      | Guanylate kinase 1                                    |
| 2391516 | 2391514 | 1298990   | 1299021   | 1 | - | NM_017900    | CCNL2     | Cyclin L2                                             |
| 2394563 | 2394558 | 6169279   | 6169310   | 1 | - | BC058887     | RPL22     | Ribosomal protein L22                                 |
| 2394564 | 2394558 | 6169393   | 6169423   | 1 | - | BC058887     | RPL22     | Ribosomal protein L22                                 |
| 2394565 | 2394558 | 6175595   | 6175649   | 1 | - | NM_000983    | RPL22     | Ribosomal protein L22                                 |
| 2399670 | 2399620 | 19450591  | 19450633  | 1 | - | NM_015047    | KIAA0090  | KIAA0090                                              |
| 2399766 | 2399765 | 19537907  | 19538195  | 1 | - | AK125085     | CAPZB     | Capping protein (actin filament) muscle Z-line, beta  |
| 2400065 | 2400059 | 20318539  | 20318578  | 1 | - | AF112982     | PLA2G2D   | Phospholipase A2, group IID                           |
| 2404159 | 2404158 | 30977913  | 30977942  | 1 | - | NM_006762    | LAPTM5    | Lysosomal associated multispanning membrane protein 5 |
| 2405003 | 2404999 | 32574155  | 32574182  | 1 | - | NM_023009    | MARCKSL1  | MARCKS-like 1                                         |
| 2407183 | 2407163 | 37792382  | 37792417  | 1 | - | NM_024700    | SNIP1     | Smad nuclear interacting protein 1                    |
| 2408102 | 2408095 | 40009308  | 40009337  | 1 | - | NM_022120    | OXCT2     | 3-oxoacid CoA transferase 2                           |

|         |         |           |           |   |   |                 |         |                                                         |
|---------|---------|-----------|-----------|---|---|-----------------|---------|---------------------------------------------------------|
| 2413009 | 2413008 | 53010422  | 53010453  | 1 | - | NM_001017       | RPS13   | Ribosomal protein S13                                   |
| 2420428 | 2420427 | 84736603  | 84736636  | 1 | - | BC003563        | GNG5    | Guanine nucleotide binding protein (G protein), gamma 5 |
| 2424464 | 2424463 | 96916963  | 96917016  | 1 | - | NM_000971       | RPL7    | Ribosomal protein L7                                    |
| 2424466 | 2424463 | 96917453  | 96917489  | 1 | - | XM_935293       | RPL7    | Ribosomal protein L7                                    |
| 2427072 | 2427007 | 109742040 | 109742065 | 1 | - | NM_002959       | SORT1   | Sortilin 1                                              |
| 2429278 | 2429277 | 115061081 | 115061119 | 1 | - | NM_002524       | NRAS    | Neuroblastoma RAS viral (v-ras) oncogene homolog        |
| 2429279 | 2429277 | 115061152 | 115061198 | 1 | - | NM_001007553    | CSDE1   | Cold shock domain containing E1, RNA-binding            |
| 2429281 | 2429277 | 115061486 | 115061528 | 1 | - | NM_001007553    | CSDE1   | Cold shock domain containing E1, RNA-binding            |
| 2429284 | 2429277 | 115062327 | 115062360 | 1 | - | ENST00000339438 | CSDE1   | Cold shock domain containing E1, RNA-binding            |
| 2431202 | 2431112 | 120413544 | 120413598 | 1 | - | BC071562        | NOTCH2  | Notch homolog 2 (Drosophila)                            |
| 2434456 | 2434438 | 148813834 | 148813983 | 1 | - | NM_021960       | MCL1    | Myeloid cell leukemia sequence 1 (BCL2-related)         |
| 2434470 | 2434438 | 148818638 | 148818667 | 1 | - | NM_021960       | MCL1    | Myeloid cell leukemia sequence 1 (BCL2-related)         |
| 2435098 | 2435044 | 149698252 | 149698277 | 1 | - | NM_207171       | POGZ    | Pogo transposable element with ZNF domain               |
| 2435392 | 2435383 | 150222307 | 150222342 | 1 | - | NM_002966       | S100A10 | S100 calcium binding protein A10                        |
| 2435411 | 2435410 | 150271626 | 150271656 | 1 | - | NM_005620       | S100A11 | S100 calcium binding protein A11                        |
| 2435691 | 2435686 | 150648484 | 150648649 | 1 | - | NM_016190       | CRNN    | Cornulin                                                |
| 2435692 | 2435686 | 150648787 | 150648858 | 1 | - | NM_016190       | CRNN    | Cornulin                                                |
| 2435850 | 2435849 | 151278921 | 151279146 | 1 | - | NM_006945       | SPRR2D  | Small proline-rich protein 2D                           |
| 2435851 | 2435849 | 151279237 | 151279291 | 1 | - | NM_006945       | SPRR2D  | Small proline-rich protein 2D                           |
| 2435852 | 2435849 | 151279417 | 151279446 | 1 | - | NM_006945       | SPRR2D  | Small proline-rich protein 2D                           |
| 2435859 | 2435858 | 151295268 | 151295502 | 1 | - | NM_005988       | SPRR2A  | Small proline-rich protein 2A                           |
| 2435860 | 2435858 | 151295619 | 151295650 | 1 | - | NM_005988       | SPRR2A  | Small proline-rich protein 2A                           |
| 2435861 | 2435858 | 151295733 | 151295781 | 1 | - | NM_005988       | SPRR2A  | Small proline-rich protein 2A                           |
| 2435862 | 2435858 | 151296571 | 151296602 | 1 | - | NM_005988       | SPRR2A  | Small proline-rich protein 2A                           |
| 2435865 | 2435863 | 151309722 | 151309784 | 1 | - | NM_001017418    | SPRR2B  | Small proline-rich protein 2B                           |
| 2435866 | 2435863 | 151309837 | 151309862 | 1 | - | NM_001017418    | SPRR2B  | Small proline-rich protein 2B                           |
| 2435867 | 2435863 | 151309910 | 151309939 | 1 | - | NM_001017418    | SPRR2B  | Small proline-rich protein 2B                           |

|         |         |           |           |   |   |              |          |                                                                                       |
|---------|---------|-----------|-----------|---|---|--------------|----------|---------------------------------------------------------------------------------------|
| 2435993 | 2435989 | 151629164 | 151629202 | 1 | - | NM_002964    | S100A8   | S100 calcium binding protein A8                                                       |
| 2435994 | 2435989 | 151629241 | 151629315 | 1 | - | NM_002964    | S100A8   | S100 calcium binding protein A8                                                       |
| 2435995 | 2435989 | 151629316 | 151629343 | 1 | - | NM_002964    | S100A8   | S100 calcium binding protein A8                                                       |
| 2435997 | 2435989 | 151629498 | 151629615 | 1 | - | NM_002964    | S100A8   | S100 calcium binding protein A8                                                       |
| 2436012 | 2436004 | 151782743 | 151782816 | 1 | - | NM_019554    | S100A4   | S100 calcium binding protein A4                                                       |
| 2436404 | 2436401 | 152213780 | 152213862 | 1 | - | CR595312     | JTB      | Jumping translocation breakpoint                                                      |
| 2436527 | 2436526 | 152395591 | 152395626 | 1 | - | NM_153649    | TPM3     | Tropomyosin 3                                                                         |
| 2437091 | 2437086 | 153379398 | 153379430 | 1 | - | NM_018973    | DPM3     | Dolichyl-phosphate mannosyltransferase polypeptide 3                                  |
| 2438418 | 2438411 | 154906297 | 154906331 | 1 | - | NM_006617    | NES      | Nestin                                                                                |
| 2439844 | 2439842 | 158154541 | 158154591 | 1 | - | NM_003564    | TAGLN2   | Transgelin 2                                                                          |
| 2442952 | 2442911 | 166350377 | 166350402 | 1 | - | AK056040     | GPR161   | G protein-coupled receptor 161                                                        |
| 2447068 | 2447066 | 180618974 | 180619332 | 1 | - | NM_002065    | GLUL     | Glutamate-ammonia ligase (glutamine synthetase)                                       |
| 2447069 | 2447066 | 180619634 | 180619873 | 1 | - | NM_002065    | GLUL     | Glutamate-ammonia ligase (glutamine synthetase)                                       |
| 2447075 | 2447066 | 180621518 | 180621553 | 1 | - | NM_001033056 | GLUL     | Glutamate-ammonia ligase (glutamine synthetase)                                       |
| 2447081 | 2447066 | 180622929 | 180623037 | 1 | - | NM_002065    | GLUL     | Glutamate-ammonia ligase (glutamine synthetase)                                       |
| 2447419 | 2447414 | 181791380 | 181791601 | 1 | - | NM_000433    | NCF2     | Neutrophil cytosolic factor 2 (65kDa, chronic granulomatous disease, autosomal 2)     |
| 2448078 | 2448073 | 183533844 | 183534009 | 1 | - | NM_016389    | IVNS1ABP | Influenza virus NS1A binding protein                                                  |
| 2448394 | 2448382 | 184912222 | 184912338 | 1 | - | AY151286     | PTGS2    | Prostaglandin-endoperoxide synthase 2 (prostaglandin G/H synthase and cyclooxygenase) |
| 2450318 | 2450300 | 198645386 | 198645432 | 1 | - | NM_012482    | ZNF281   | Zinc finger protein 281                                                               |
| 2464548 | 2464499 | 243093572 | 243093597 | 1 | - | NM_031844    | HNRPU    | Heterogeneous nuclear ribonucleoprotein U (scaffold attachment factor A)              |
| 2467192 | 2467178 | 3601966   | 3602057   | 2 | + | NM_001011    | RPS7     | Ribosomal protein S7                                                                  |
| 2467196 | 2467178 | 3603176   | 3603239   | 2 | + | AB209386     | RPS7     | Ribosomal protein S7                                                                  |
| 2467200 | 2467178 | 3605576   | 3605677   | 2 | + | XM_015717    | GPR177   | G protein-coupled receptor 177                                                        |

|         |         |           |           |   |   |           |         |                                                                                       |
|---------|---------|-----------|-----------|---|---|-----------|---------|---------------------------------------------------------------------------------------|
| 2467201 | 2467178 | 3605690   | 3605725   | 2 | + | XM_015717 | GPR177  | G protein-coupled receptor 177                                                        |
| 2467205 | 2467178 | 3606270   | 3606341   | 2 | + | XM_015717 | GPR177  | G protein-coupled receptor 177                                                        |
| 2470486 | 2470470 | 14691983  | 14692009  | 2 | + | BC026346  | FAM84A  | Family with sequence similarity 84, member A                                          |
| 2480594 | 2480589 | 46704806  | 46704835  | 2 | + | NM_014171 | CRIP1   | Cysteine-rich PDZ-binding protein                                                     |
| 2482232 | 2482230 | 53867818  | 53867851  | 2 | + | NM_015701 | C2orf30 | Chromosome 2 open reading frame 30                                                    |
| 2482940 | 2482921 | 55316079  | 55316203  | 2 | + | NM_002954 | RPS27A  | Ribosomal protein S27a                                                                |
| 2484360 | 2484358 | 60962448  | 60962479  | 2 | + | BC051005  | REL     | V-rel reticuloendotheliosis viral oncogene homolog (avian)                            |
| 2485434 | 2485433 | 64604969  | 64605009  | 2 | + | NM_017657 | AFTPH   | Aftiphilin                                                                            |
| 2486820 | 2486811 | 68461382  | 68461532  | 2 | + | NM_002664 | PLEK    | Pleckstrin                                                                            |
| 2487484 | 2487478 | 69910631  | 69910674  | 2 | + | NM_178439 | GMCL1   | Germ cell-less homolog 1 (Drosophila)                                                 |
| 2487553 | 2487549 | 69995973  | 69996038  | 2 | + | NM_002357 | MXD1    | MAX dimerization protein 1                                                            |
| 2487573 | 2487549 | 70015987  | 70016078  | 2 | + | NM_002357 | MXD1    | MAX dimerization protein 1                                                            |
| 2490394 | 2490351 | 79593731  | 79593760  | 2 | + | NM_004389 | CTNNA2  | Catenin (cadherin-associated protein), alpha 2                                        |
| 2491297 | 2491271 | 84987213  | 84987250  | 2 | + | NM_021103 | TMSB10  | Thymosin, beta 10                                                                     |
| 2491672 | 2491661 | 85662554  | 85662656  | 2 | + | NM_003761 | VAMP8   | Vesicle-associated membrane protein 8 (endobrevin)                                    |
| 2493868 | 2493858 | 95082853  | 95082910  | 2 | + | AK123269  | MAL     | Mal, T-cell differentiation protein                                                   |
| 2493869 | 2493858 | 95083090  | 95083297  | 2 | + | AK123269  | MAL     | Mal, T-cell differentiation protein                                                   |
| 2496540 | 2496536 | 100985635 | 100985669 | 2 | + | CR595074  | RPL31   | Ribosomal protein L31                                                                 |
| 2496542 | 2496536 | 100987055 | 100987152 | 2 | + | CR595074  | RPL31   | Ribosomal protein L31                                                                 |
| 2496547 | 2496536 | 100988855 | 100988884 | 2 | + | CR595074  | RPL31   | Ribosomal protein L31                                                                 |
| 2496548 | 2496536 | 100988937 | 100988965 | 2 | + | CR595074  | RPL31   | Ribosomal protein L31                                                                 |
| 2496940 | 2496907 | 102011126 | 102011204 | 2 | + | NM_004633 | IL1R2   | Interleukin 1 receptor, type II                                                       |
| 2501235 | 2501204 | 113607707 | 113608022 | 2 | + | NM_173842 | IL1RN   | Interleukin 1 receptor antagonist                                                     |
| 2501703 | 2501697 | 114364280 | 114364308 | 2 | + | NM_005721 | RPS6KA3 | Ribosomal protein S6 kinase, 90kDa, polypeptide 3                                     |
| 2502838 | 2502821 | 119846458 | 119846546 | 2 | + | NM_020548 | DBI     | Diazepam binding inhibitor (GABA receptor modulator, acyl-Coenzyme A binding protein) |
| 2504608 | 2504595 | 127900238 | 127900264 | 2 | + | NM_000312 | PROC    | Protein C (inactivator of coagulation factors Va and VIIIa)                           |

|         |         |           |           |     |              |           |                                                             |
|---------|---------|-----------|-----------|-----|--------------|-----------|-------------------------------------------------------------|
| 2516453 | 2516450 | 175293416 | 175293442 | 2 + | XM_930111    | LOC644914 | Similar to H3 histone, family 3B                            |
| 2516454 | 2516450 | 175293670 | 175293695 | 2 + | XM_930111    | LOC644914 | Similar to H3 histone, family 3B                            |
| 2516455 | 2516450 | 175293768 | 175293804 | 2 + | XM_930111    | LOC644914 | Similar to H3 histone, family 3B                            |
| 2517322 | 2517302 | 177792224 | 177792268 | 2 + | NM_194247    | HNRPA3    | Heterogeneous nuclear ribonucleoprotein A3                  |
| 2522612 | 2522598 | 201658553 | 201658582 | 2 + | NM_002491    | NDUFB3    | NADH dehydrogenase (ubiquinone) 1 beta subcomplex, 3, 12kDa |
| 2522613 | 2522598 | 201658592 | 201658681 | 2 + | NM_002491    | NDUFB3    | NADH dehydrogenase (ubiquinone) 1 beta subcomplex, 3, 12kDa |
| 2523630 | 2523627 | 203763878 | 203763920 | 2 + | AK026526     | RPL12     | Ribosomal protein L12                                       |
| 2523631 | 2523627 | 203763957 | 203764021 | 2 + | AK026526     | RPL12     | Ribosomal protein L12                                       |
| 2523633 | 2523627 | 203764078 | 203764208 | 2 + | AK026526     | RPL12     | Ribosomal protein L12                                       |
| 2524601 | 2524577 | 206735853 | 206735882 | 2 + | NM_001037663 | EEF1B2    | Eukaryotic translation elongation factor 1 beta 2           |
| 2527201 | 2527196 | 217072244 | 217072364 | 2 + | AK023419     | RPL37A    | Ribosomal protein L37a                                      |
| 2527204 | 2527196 | 217072923 | 217072998 | 2 + | AK023419     | RPL37A    | Ribosomal protein L37a                                      |
| 2527206 | 2527196 | 217074328 | 217074372 | 2 + | NM_000998    | RPL37A    | Ribosomal protein L37a                                      |
| 2527207 | 2527196 | 217074385 | 217074415 | 2 + | NM_000998    | RPL37A    | Ribosomal protein L37a                                      |
| 2527592 | 2527580 | 218708823 | 218708852 | 2 + | NM_001557    | IL8RB     | Interleukin 8 receptor, beta                                |
| 2527593 | 2527580 | 218709391 | 218710137 | 2 + | NM_001557    | IL8RB     | Interleukin 8 receptor, beta                                |
| 2527609 | 2527606 | 218790185 | 218790217 | 2 + | NM_152862    | ARPC2     | Actin related protein 2/3 complex, subunit 2, 34kDa         |
| 2527640 | 2527606 | 218822332 | 218822413 | 2 + | AF279893     | ARPC2     | Actin related protein 2/3 complex, subunit 2, 34kDa         |
| 2527642 | 2527606 | 218822789 | 218822870 | 2 + | AF279893     | ARPC2     | Actin related protein 2/3 complex, subunit 2, 34kDa         |
| 2527646 | 2527606 | 218826899 | 218826925 | 2 + | NM_005731    | ARPC2     | Actin related protein 2/3 complex, subunit 2, 34kDa         |
| 2527647 | 2527606 | 218826946 | 218827077 | 2 + | NM_005731    | ARPC2     | Actin related protein 2/3 complex, subunit 2, 34kDa         |
| 2531382 | 2531377 | 230989257 | 230989287 | 2 + | NM_003113    | SP100     | SP100 nuclear antigen                                       |



|         |         |           |           |     |           |         |                                                                                                                                                                   |
|---------|---------|-----------|-----------|-----|-----------|---------|-------------------------------------------------------------------------------------------------------------------------------------------------------------------|
| 2532046 | 2532021 | 232285422 | 232285458 | 2 + | BX647606  | PTMA    | Prothymosin, alpha (gene sequence 28)                                                                                                                             |
| 2532049 | 2532021 | 232285758 | 232285805 | 2 + | NM_002823 | PTMA    | Prothymosin, alpha (gene sequence 28)                                                                                                                             |
| 2532564 | 2532510 | 233364368 | 233364400 | 2 + | NM_015575 | TNRC15  | Trinucleotide repeat containing 15                                                                                                                                |
| 2544633 | 2544625 | 25237338  | 25237370  | 2 - | BC065832  | POMC    | Proopiomelanocortin<br>(adrenocorticotropin/ beta-lipotropin/<br>alpha-melanocyte stimulating hormone/<br>beta-melanocyte stimulating hormone/<br>beta-endorphin) |
| 2545842 | 2545841 | 27469089  | 27469136  | 2 - | BC035441  | FTH1    | Ferritin, heavy polypeptide 1                                                                                                                                     |
| 2545844 | 2545841 | 27469324  | 27469367  | 2 - | BC035441  | FTH1    | Ferritin, heavy polypeptide 1                                                                                                                                     |
| 2545846 | 2545841 | 27469523  | 27469589  | 2 - | BC035441  | FTH1    | Ferritin, heavy polypeptide 1                                                                                                                                     |
| 2549496 | 2549455 | 39859758  | 39859793  | 2 - | NM_025264 | THUMPD2 | THUMP domain containing 2                                                                                                                                         |
| 2559801 | 2559792 | 74228513  | 74228543  | 2 - | NM_212552 | BOLA3   | BolA homolog 3 (E. coli)                                                                                                                                          |
| 2559970 | 2559967 | 74442064  | 74442096  | 2 - | NM_033323 | SLC4A5  | Solute carrier family 4, sodium<br>bicarbonate cotransporter, member 5                                                                                            |
| 2562570 | 2562529 | 85969514  | 85969539  | 2 - | NM_003896 | ST3GAL5 | ST3 beta-galactoside alpha-2,3-<br>sialyltransferase 5                                                                                                            |
| 2562725 | 2562685 | 86275973  | 86276003  | 2 - | CR610445  | IMMT    | Inner membrane protein, mitochondrial<br>(mitofilin)                                                                                                              |
| 2571247 | 2571217 | 112729030 | 112729062 | 2 - | BC032001  | ZC3H8   | Zinc finger CCCH-type containing 8                                                                                                                                |
| 2571511 | 2571510 | 113304067 | 113304373 | 2 - | NM_000576 | IL1B    | Interleukin 1, beta                                                                                                                                               |
| 2571512 | 2571510 | 113304418 | 113304543 | 2 - | NM_000576 | IL1B    | Interleukin 1, beta                                                                                                                                               |
| 2571514 | 2571510 | 113305340 | 113305469 | 2 - | NM_000576 | IL1B    | Interleukin 1, beta                                                                                                                                               |
| 2571517 | 2571510 | 113306743 | 113306849 | 2 - | NM_000576 | IL1B    | Interleukin 1, beta                                                                                                                                               |
| 2571519 | 2571510 | 113307506 | 113307591 | 2 - | NM_000576 | IL1B    | Interleukin 1, beta                                                                                                                                               |
| 2571876 | 2571874 | 114085807 | 114085836 | 2 - | XM_929847 | MGC2752 | Hypothetical protein MGC2752                                                                                                                                      |
| 2585800 | 2585701 | 168812222 | 168812290 | 2 - | NM_013233 | STK39   | Serine threonine kinase 39 (STE20/SPS1<br>homolog, yeast)                                                                                                         |
| 2585801 | 2585701 | 168812312 | 168812351 | 2 - | NM_013233 | STK39   | Serine threonine kinase 39 (STE20/SPS1<br>homolog, yeast)                                                                                                         |

|         |         |           |           |   |   |              |           |                                                                                             |
|---------|---------|-----------|-----------|---|---|--------------|-----------|---------------------------------------------------------------------------------------------|
| 2586800 | 2586798 | 172081997 | 172082025 | 2 | - | XM_496442    | LOC440733 | Similar to 40S ribosomal protein S15 (RIG protein)                                          |
| 2588134 | 2588127 | 175751303 | 175751329 | 2 | - | NM_001002258 | ATP5G3    | ATP synthase, H <sup>+</sup> transporting, mitochondrial F0 complex, subunit C3 (subunit 9) |
| 2603465 | 2603460 | 232028356 | 232028399 | 2 | - | NM_005381    | NCL       | Nucleolin                                                                                   |
| 2603466 | 2603460 | 232028413 | 232028456 | 2 | - | NM_005381    | NCL       | Nucleolin                                                                                   |
| 2610137 | 2610136 | 9950562   | 9950590   | 3 | + | NM_001031717 | CRELD1    | Cysteine-rich with EGF-like domains 1                                                       |
| 2614132 | 2614120 | 23935935  | 23935965  | 3 | + | NM_002948    | RPL15     | Ribosomal protein L15                                                                       |
| 2614136 | 2614120 | 23936861  | 23937067  | 3 | + | NM_002948    | RPL15     | Ribosomal protein L15                                                                       |
| 2614137 | 2614120 | 23937183  | 23937311  | 3 | + | NM_002948    | RPL15     | Ribosomal protein L15                                                                       |
| 2617578 | 2617563 | 38159428  | 38159484  | 3 | + | NM_002468    | MYD88     | Myeloid differentiation primary response gene (88)                                          |
| 2618653 | 2618640 | 40478564  | 40478607  | 3 | + | NM_003973    | RPL14     | Ribosomal protein L14                                                                       |
| 2621693 | 2621692 | 48456673  | 48456705  | 3 | + | BC066333     | CCDC72    | Coiled-coil domain containing 72                                                            |
| 2621703 | 2621692 | 48460352  | 48460378  | 3 | + | NM_015933    | CCDC72    | Coiled-coil domain containing 72                                                            |
| 2622097 | 2622095 | 49424810  | 49424841  | 3 | + | NM_022171    | TCTA      | T-cell leukemia translocation altered gene                                                  |
| 2622154 | 2622153 | 49566927  | 49566974  | 3 | + | NM_003458    | BSN       | Bassoon (presynaptic cytomatrix protein)                                                    |
| 2623142 | 2623139 | 51397753  | 51397779  | 3 | + | NM_006010    | ARMET     | Arginine-rich, mutated in early stage tumors                                                |
| 2623159 | 2623154 | 51404521  | 51404556  | 3 | + | NM_013286    | RBM15B    | RNA binding motif protein 15B                                                               |
| 2623579 | 2623568 | 52256738  | 52256768  | 3 | + | NM_144641    | PPM1M     | Protein phosphatase 1M (PP2C domain containing)                                             |
| 2624335 | 2624291 | 53201459  | 53201733  | 3 | + | NM_006254    | PRKCD     | Protein kinase C, delta                                                                     |
| 2626168 | 2626167 | 58293658  | 58293726  | 3 | + | NM_017771    | PXK       | PX domain containing serine/threonine kinase                                                |
| 2633932 | 2633930 | 102775750 | 102775777 | 3 | + | NM_020357    | PCNP      | PEST proteolytic signal containing nuclear protein                                          |
| 2638872 | 2638869 | 123526798 | 123526829 | 3 | + | NM_005213    | CSTA      | Cystatin A (stefin A)                                                                       |
| 2638873 | 2638869 | 123526838 | 123526872 | 3 | + | NM_005213    | CSTA      | Cystatin A (stefin A)                                                                       |
| 2638879 | 2638869 | 123543017 | 123543103 | 3 | + | NM_005213    | CSTA      | Cystatin A (stefin A)                                                                       |
| 2638880 | 2638869 | 123543118 | 123543196 | 3 | + | NM_005213    | CSTA      | Cystatin A (stefin A)                                                                       |

|         |         |           |           |     |           |        |                                                                                                 |
|---------|---------|-----------|-----------|-----|-----------|--------|-------------------------------------------------------------------------------------------------|
| 2640950 | 2640916 | 128882064 | 128882440 | 3 + | NM_172027 | ABTB1  | Ankyrin repeat and BTB (POZ) domain containing 1                                                |
| 2644016 | 2644014 | 137451909 | 137451934 | 3 + | NM_000532 | PCCB   | Propionyl Coenzyme A carboxylase, beta polypeptide                                              |
| 2649653 | 2649640 | 159852586 | 159852682 | 3 + | NM_024996 | GFM1   | G elongation factor, mitochondrial 1                                                            |
| 2656790 | 2656738 | 187990113 | 187990166 | 3 + | NM_001967 | EIF4A2 | Eukaryotic translation initiation factor 4A, isoform 2                                          |
| 2659497 | 2659496 | 197747816 | 197747959 | 3 + | NM_001032 | RPS29  | Ribosomal protein S29                                                                           |
| 2660023 | 2660013 | 199165271 | 199165349 | 3 + | NM_000996 | RPL35A | Ribosomal protein L35a                                                                          |
| 2662489 | 2662473 | 9969006   | 9969031   | 3 - | NM_207351 | PRRT3  | Proline-rich transmembrane protein 3                                                            |
| 2663355 | 2663350 | 12852644  | 12852717  | 3 - | NM_000994 | RPL32  | Ribosomal protein L32                                                                           |
| 2665203 | 2665199 | 18366119  | 18366178  | 3 - | NM_002971 | SATB1  | Special AT-rich sequence binding protein 1 (binds to nuclear matrix/scaffold-associating DNA's) |
| 2666548 | 2666478 | 25680724  | 25680791  | 3 - | NM_001068 | TOP2B  | Topoisomerase (DNA) II beta 180kDa                                                              |
| 2668406 | 2668351 | 33456345  | 33456372  | 3 - | NM_014517 | UBP1   | Upstream binding protein 1 (LBP-1a)                                                             |
| 2672730 | 2672712 | 47434282  | 47434316  | 3 - | NM_012235 | SCAP   | SREBP cleavage-activating protein                                                               |
| 2673274 | 2673270 | 48484304  | 48484577  | 3 - | NM_016479 | SCOTIN | Scotin                                                                                          |
| 2674232 | 2674229 | 49369646  | 49369672  | 3 - | NM_000581 | GPX1   | Glutathione peroxidase 1                                                                        |
| 2674247 | 2674242 | 49372382  | 49372631  | 3 - | NM_001664 | RHOA   | Ras homolog gene family, member A                                                               |
| 2675860 | 2675859 | 52002725  | 52002804  | 3 - | NM_000992 | RPL29  | Ribosomal protein L29                                                                           |
| 2676625 | 2676579 | 53139475  | 53139502  | 3 - | NM_052859 | RFT1   | RFT1 homolog ( <i>S. cerevisiae</i> )                                                           |
| 2676676 | 2676671 | 53234715  | 53234789  | 3 - | NM_001064 | TKT    | Transketolase (Wernicke-Korsakoff syndrome)                                                     |
| 2679195 | 2679193 | 61703232  | 61703335  | 3 - | NM_007104 | RPL10A | Ribosomal protein L10a                                                                          |
| 2686718 | 2686717 | 102778025 | 102778054 | 3 - | NM_022551 | RPS18  | Ribosomal protein S18                                                                           |
| 2686719 | 2686717 | 102778055 | 102778091 | 3 - | NM_022551 | RPS18  | Ribosomal protein S18                                                                           |
| 2686720 | 2686717 | 102778095 | 102778127 | 3 - | NM_022551 | RPS18  | Ribosomal protein S18                                                                           |
| 2686786 | 2686768 | 102887412 | 102887451 | 3 - | NM_000986 | RPL24  | Ribosomal protein L24                                                                           |
| 2691669 | 2691668 | 122832964 | 122833201 | 3 - | NM_005335 | HCLS1  | Hematopoietic cell-specific Lyn substrate 1                                                     |
| 2691670 | 2691668 | 122833219 | 122833283 | 3 - | NM_005335 | HCLS1  | Hematopoietic cell-specific Lyn substrate 1                                                     |
| 2697660 | 2697652 | 140147875 | 140147900 | 3 - | NM_023067 | FOXL2  | Forkhead box L2                                                                                 |
| 2698741 | 2698738 | 143510834 | 143510916 | 3 - | NM_019001 | XRN1   | 5'-3' exoribonuclease 1                                                                         |

|         |         |           |           |   |   |              |         |                                                                                |
|---------|---------|-----------|-----------|---|---|--------------|---------|--------------------------------------------------------------------------------|
| 2703489 | 2703488 | 162629550 | 162629602 | 3 | - | U37230       | RPL23A  | Ribosomal protein L23a                                                         |
| 2705708 | 2705706 | 173706227 | 173706323 | 3 | - | NM_003810    | TNFSF10 | Tumor necrosis factor (ligand) superfamily, member 10                          |
| 2708075 | 2708066 | 184691875 | 184691902 | 3 | - | NM_130446    | KLHL6   | Kelch-like 6 (Drosophila)                                                      |
| 2708484 | 2708457 | 185558124 | 185558180 | 3 | - | NM_004366    | CLCN2   | Chloride channel 2                                                             |
| 2709112 | 2709062 | 187138309 | 187138339 | 3 | - | NM_004593    | SFRS10  | Splicing factor, arginine/serine-rich 10 (transformer 2 homolog, Drosophila)   |
| 2730187 | 2730173 | 70902495  | 70902707  | 4 | + | NM_001009181 | STATH   | Statherin                                                                      |
| 2730198 | 2730194 | 70931059  | 70931097  | 4 | + | NM_000200    | STATH   | Statherin                                                                      |
| 2730203 | 2730194 | 70933480  | 70933515  | 4 | + | NM_000200    | STATH   | Statherin                                                                      |
| 2730210 | 2730194 | 70936576  | 70936639  | 4 | + | NM_000200    | STATH   | Statherin                                                                      |
| 2730211 | 2730194 | 70936681  | 70936735  | 4 | + | NM_000200    | STATH   | Statherin                                                                      |
| 2730224 | 2730212 | 70958928  | 70959047  | 4 | + | CR627329     | STATH   | Statherin                                                                      |
| 2730311 | 2730303 | 71135407  | 71135516  | 4 | + | NM_152997    | C4orf7  | Chromosome 4 open reading frame 7                                              |
| 2730400 | 2730396 | 71267214  | 71267252  | 4 | + | NM_012390    | SMR3A   | Submaxillary gland androgen regulated protein 3 homolog A (mouse)              |
| 2730416 | 2730404 | 71290333  | 71290477  | 4 | + | BC094707     | MUC7    | Mucin 7, secreted                                                              |
| 2730417 | 2730404 | 71290515  | 71290547  | 4 | + | BC094707     | MUC7    | Mucin 7, secreted                                                              |
| 2730440 | 2730431 | 71381123  | 71381158  | 4 | + | NM_152291    | MUC7    | Mucin 7, secreted                                                              |
| 2730445 | 2730431 | 71381764  | 71381798  | 4 | + | NM_152291    | MUC7    | Mucin 7, secreted                                                              |
| 2730447 | 2730431 | 71382018  | 71382161  | 4 | + | NM_152291    | MUC7    | Mucin 7, secreted                                                              |
| 2730448 | 2730431 | 71382361  | 71382841  | 4 | + | NM_152291    | MUC7    | Mucin 7, secreted                                                              |
| 2731335 | 2731332 | 74825242  | 74825300  | 4 | + | NM_000584    | IL8     | Interleukin 8                                                                  |
| 2731338 | 2731332 | 74826123  | 74826252  | 4 | + | NM_000584    | IL8     | Interleukin 8                                                                  |
| 2731341 | 2731332 | 74827307  | 74828019  | 4 | + | NM_000584    | IL8     | Interleukin 8                                                                  |
| 2731389 | 2731381 | 74955333  | 74955769  | 4 | + | NM_001511    | CXCL1   | Chemokine (C-X-C motif) ligand 1 (melanoma growth stimulating activity, alpha) |
| 2733296 | 2733287 | 81325644  | 81325696  | 4 | + | AF275815     | PRDM8   | PR domain containing 8                                                         |
| 2736437 | 2736322 | 95804800  | 95804920  | 4 | + | NM_006457    | PDLIM5  | PDZ and LIM domain 5                                                           |
| 2738919 | 2738908 | 109762567 | 109762603 | 4 | + | NM_033625    | RPL34   | Ribosomal protein L34                                                          |
| 2738921 | 2738908 | 109762753 | 109762809 | 4 | + | NM_033625    | RPL34   | Ribosomal protein L34                                                          |
| 2738923 | 2738908 | 109763120 | 109763171 | 4 | + | NM_033625    | RPL34   | Ribosomal protein L34                                                          |
| 2738924 | 2738908 | 109763175 | 109763223 | 4 | + | NM_033625    | RPL34   | Ribosomal protein L34                                                          |

|         |         |           |           |     |              |           |                                                                                      |
|---------|---------|-----------|-----------|-----|--------------|-----------|--------------------------------------------------------------------------------------|
| 2738928 | 2738908 | 109765733 | 109765800 | 4 + | NM_033625    | RPL34     | Ribosomal protein L34                                                                |
| 2747394 | 2747385 | 152241587 | 152241752 | 4 + | NM_001006    | RPS3A     | Ribosomal protein S3A                                                                |
| 2747396 | 2747385 | 152243505 | 152243540 | 4 + | NM_001006    | RPS3A     | Ribosomal protein S3A                                                                |
| 2747397 | 2747385 | 152243644 | 152243678 | 4 + | XM_495839    | LOC439992 | Similar to ribosomal protein S3a                                                     |
| 2747404 | 2747385 | 152244791 | 152244859 | 4 + | NM_001006    | RPS3A     | Ribosomal protein S3A                                                                |
| 2747406 | 2747385 | 152245077 | 152245156 | 4 + | NM_001006    | RPS3A     | Ribosomal protein S3A                                                                |
| 2756500 | 2756497 | 656237    | 656281    | 4 - | NM_007100    | ATP5I     | ATP synthase, H <sup>+</sup> transporting, mitochondrial F0 complex, subunit E       |
| 2757444 | 2757427 | 1793708   | 1793743   | 4 - | NM_012318    | LETM1     | Leucine zipper-EF-hand containing transmembrane protein 1                            |
| 2760883 | 2760869 | 11039421  | 11039453  | 4 - | NM_005114    | HS3ST1    | Heparan sulfate (glucosamine) 3-O-sulfotransferase 1                                 |
| 2766422 | 2766419 | 39132194  | 39132222  | 4 - | BC070214     | RPL9      | Ribosomal protein L9                                                                 |
| 2766424 | 2766419 | 39132558  | 39132642  | 4 - | NM_000661    | RPL9      | Ribosomal protein L9                                                                 |
| 2766427 | 2766419 | 39132893  | 39132957  | 4 - | NM_000661    | RPL9      | Ribosomal protein L9                                                                 |
| 2766429 | 2766419 | 39134422  | 39134512  | 4 - | NM_000661    | RPL9      | Ribosomal protein L9                                                                 |
| 2766433 | 2766419 | 39135633  | 39135690  | 4 - | NM_000661    | RPL9      | Ribosomal protein L9                                                                 |
| 2777746 | 2777714 | 90968319  | 90968349  | 4 - | NM_007308    | SNCA      | Synuclein, alpha (non A4 component of amyloid precursor)                             |
| 2777882 | 2777880 | 91978738  | 91978804  | 4 - | NM_183049    | TMSL3     | Thymosin-like 3                                                                      |
| 2777883 | 2777880 | 91978808  | 91978879  | 4 - | NM_183049    | TMSL3     | Thymosin-like 3                                                                      |
| 2777885 | 2777880 | 91978974  | 91979071  | 4 - | NM_183049    | TMSL3     | Thymosin-like 3                                                                      |
| 2792434 | 2792420 | 166253349 | 166253375 | 4 - | BX538029     | FLJ38482  | Hypothetical protein FLJ38482                                                        |
| 2814546 | 2814527 | 70787266  | 70787328  | 5 + | NM_018429    | BDP1      | B double prime 1, subunit of RNA polymerase III transcription initiation factor IIIB |
| 2815367 | 2815331 | 72836774  | 72836819  | 5 + | NM_001037637 | BTF3      | Basic transcription factor 3                                                         |
| 2815368 | 2815331 | 72836824  | 72836874  | 5 + | NM_001037637 | BTF3      | Basic transcription factor 3                                                         |
| 2815369 | 2815331 | 72837004  | 72837053  | 5 + | NM_001037637 | BTF3      | Basic transcription factor 3                                                         |
| 2824097 | 2824089 | 111525777 | 111525849 | 5 + | CR612688     | EPB41L4A  | Erythrocyte membrane protein band 4.1 like 4A                                        |
| 2828792 | 2828787 | 132231079 | 132231137 | 5 + | NM_014402    | UQCRCQ    | Ubiquinol-cytochrome c reductase, complex III subunit VII, 9.5kDa                    |

|         |         |           |           |     |              |           |                                                                   |
|---------|---------|-----------|-----------|-----|--------------|-----------|-------------------------------------------------------------------|
| 2828793 | 2828787 | 132231143 | 132231173 | 5 + | NM_014402    | UQCRCQ    | Ubiquinol-cytochrome c reductase, complex III subunit VII, 9.5kDa |
| 2829867 | 2829864 | 135198449 | 135198480 | 5 + | BC025747     | LOC153328 | Similar to CG4995 gene product                                    |
| 2830743 | 2830742 | 137716227 | 137716342 | 5 + | NM_016604    | JMJD1B    | Jumonji domain containing 1B                                      |
| 2830874 | 2830861 | 137829542 | 137829616 | 5 + | NM_001964    | EGR1      | Early growth response 1                                           |
| 2830888 | 2830861 | 137832438 | 137832484 | 5 + | NM_001964    | EGR1      | Early growth response 1                                           |
| 2830889 | 2830861 | 137832489 | 137832848 | 5 + | NM_001964    | EGR1      | Early growth response 1                                           |
| 2835666 | 2835662 | 150138497 | 150138526 | 5 + | NM_032947    | MST150    | MSTP150                                                           |
| 2836888 | 2836886 | 154300864 | 154300891 | 5 + | NM_014180    | MRPL22    | Mitochondrial ribosomal protein L22                               |
| 2839742 | 2839735 | 167976451 | 167976556 | 5 + | NM_006013    | RPL10     | Ribosomal protein L10                                             |
| 2841259 | 2841184 | 172312087 | 172312273 | 5 + | AF267855     | ERGIC1    | Endoplasmic reticulum-golgi intermediate compartment (ERGIC) 1    |
| 2842575 | 2842570 | 175807984 | 175808014 | 5 + | NM_014613    | UBXD8     | UBX domain containing 8                                           |
| 2843505 | 2843485 | 177415810 | 177415861 | 5 + | NM_000981    | RPL19     | Ribosomal protein L19                                             |
| 2843856 | 2843855 | 178255535 | 178255562 | 5 + | NM_030613    | PIGF      | Phosphatidylinositol glycan anchor biosynthesis, class F          |
| 2844539 | 2844479 | 179196495 | 179196727 | 5 + | NM_003900    | SQSTM1    | Sequestosome 1                                                    |
| 2846539 | 2846522 | 2800690   | 2800717   | 5 - | NM_033267    | IRX2      | Iroquois homeobox protein 2                                       |
| 2847371 | 2847292 | 6686053   | 6686085   | 5 - | NM_017755    | NSUN2     | NOL1/NOP2/Sun domain family, member 2                             |
| 2850211 | 2850071 | 16989040  | 16989074  | 5 - | NM_012334    | MYO10     | Myosin X                                                          |
| 2852326 | 2852274 | 32348650  | 32348698  | 5 - | NM_001040446 | MTMR12    | Myotubularin related protein 12                                   |
| 2863638 | 2863637 | 77022869  | 77022975  | 5 - | NM_004607    | TBCA      | Tubulin folding cofactor A                                        |
| 2865064 | 2865050 | 81607702  | 81607750  | 5 - | NM_001025    | RPS23     | Ribosomal protein S23                                             |
| 2865065 | 2865050 | 81607804  | 81607830  | 5 - | NM_001025    | RPS23     | Ribosomal protein S23                                             |
| 2865068 | 2865050 | 81607978  | 81608068  | 5 - | NM_001025    | RPS23     | Ribosomal protein S23                                             |
| 2871868 | 2871821 | 114989389 | 114989418 | 5 - | NM_181836    | TICAM2    | Toll-like receptor adaptor molecule 2                             |
| 2871987 | 2871986 | 115415471 | 115415504 | 5 - | NM_001028    | RPS25     | Ribosomal protein S25                                             |
| 2875004 | 2874920 | 131354528 | 131354558 | 5 - | NM_015256    | ACSL6     | Acyl-CoA synthetase long-chain family member 6                    |
| 2876019 | 2876011 | 133521127 | 133521182 | 5 - | NM_006930    | SKP1A     | S-phase kinase-associated protein 1A (p19A)                       |
| 2878439 | 2878437 | 139991629 | 139991675 | 5 - | NM_001040021 | CD14      | CD14 molecule                                                     |
| 2881417 | 2881413 | 149804055 | 149804107 | 5 - | NM_001025071 | RPS14     | Ribosomal protein S14                                             |

|         |         |           |           |   |   |              |         |                                                                           |
|---------|---------|-----------|-----------|---|---|--------------|---------|---------------------------------------------------------------------------|
| 2881421 | 2881413 | 149805365 | 149805424 | 5 | - | NM_001025071 | RPS14   | Ribosomal protein S14                                                     |
| 2881423 | 2881413 | 149806572 | 149806668 | 5 | - | NM_001025071 | RPS14   | Ribosomal protein S14                                                     |
| 2881426 | 2881413 | 149807377 | 149807462 | 5 | - | NM_001025071 | RPS14   | Ribosomal protein S14                                                     |
| 2881673 | 2881672 | 150389710 | 150389744 | 5 | - | NM_006058    | TNIP1   | TNFAIP3 interacting protein 1                                             |
| 2888658 | 2888648 | 176661739 | 176661767 | 5 | - | NM_001031677 | RAB24   | RAB24, member RAS oncogene family                                         |
| 2890425 | 2890413 | 179315164 | 179315189 | 5 | - | NM_018434    | RNF130  | Ring finger protein 130                                                   |
| 2891053 | 2891052 | 180596600 | 180596644 | 5 | - | NM_006098    | GNB2L1  | Guanine nucleotide binding protein (G protein), beta polypeptide 2-like 1 |
| 2891059 | 2891052 | 180597731 | 180597812 | 5 | - | NM_006098    | GNB2L1  | Guanine nucleotide binding protein (G protein), beta polypeptide 2-like 1 |
| 2891064 | 2891052 | 180598699 | 180598731 | 5 | - | NM_006098    | GNB2L1  | Guanine nucleotide binding protein (G protein), beta polypeptide 2-like 1 |
| 2891067 | 2891052 | 180599134 | 180599168 | 5 | - | NM_006098    | GNB2L1  | Guanine nucleotide binding protein (G protein), beta polypeptide 2-like 1 |
| 2895300 | 2895296 | 12622881  | 12622911  | 6 | + | XM_927555    | RPL15   | Ribosomal protein L15                                                     |
| 2898103 | 2898096 | 22678152  | 22678199  | 6 | + | NM_138574    | HDGFL1  | Hepatoma derived growth factor-like 1                                     |
| 2899349 | 2899340 | 26493324  | 26493362  | 6 | + | BC014021     | BTN2A2  | Butyrophilin, subfamily 2, member A2                                      |
| 2900995 | 2900974 | 29801771  | 29801799  | 6 | + | BC009260     | HLA-F   | Major histocompatibility complex, class I, F                              |
| 2901371 | 2901352 | 30145737  | 30146005  | 6 | + | BC003144     | PPP1R11 | Protein phosphatase 1, regulatory (inhibitor) subunit 11                  |
| 2901634 | 2901620 | 30567316  | 30567403  | 6 | + | AB209870     | HLA-E   | Major histocompatibility complex, class I, E                              |
| 2901637 | 2901620 | 30568160  | 30568192  | 6 | + | NM_005516    | HLA-E   | Major histocompatibility complex, class I, E                              |
| 2901639 | 2901620 | 30568308  | 30568337  | 6 | + | M31183       | HLA-E   | Major histocompatibility complex, class I, E                              |
| 2901641 | 2901620 | 30568611  | 30568744  | 6 | + | NM_005516    | HLA-E   | Major histocompatibility complex, class I, E                              |
| 2902443 | 2902427 | 31664535  | 31664566  | 6 | + | NM_205840    | LST1    | Leukocyte specific transcript 1                                           |
| 2902457 | 2902444 | 31692158  | 31692211  | 6 | + | NM_001623    | AIF1    | Allograft inflammatory factor 1                                           |
| 2902460 | 2902444 | 31692720  | 31692756  | 6 | + | NM_004847    | AIF1    | Allograft inflammatory factor 1                                           |
| 2902715 | 2902707 | 31893516  | 31893591  | 6 | + | NM_005345    | HSPA1A  | Heat shock 70kDa protein 1A                                               |
| 2902716 | 2902707 | 31893597  | 31893660  | 6 | + | NM_005345    | HSPA1A  | Heat shock 70kDa protein 1A                                               |
| 2902756 | 2902736 | 31915304  | 31915390  | 6 | + | NM_001040438 | C6orf48 | Chromosome 6 open reading frame 48                                        |

|         |         |           |           |     |              |           |                                                                                           |
|---------|---------|-----------|-----------|-----|--------------|-----------|-------------------------------------------------------------------------------------------|
| 2902757 | 2902736 | 31915420  | 31915446  | 6 + | NM_001040438 | C6orf48   | Chromosome 6 open reading frame 48                                                        |
| 2903313 | 2903285 | 32935187  | 32935270  | 6 + | NM_002800    | PSMB9     | Proteasome (prosome, macropain) subunit, beta type, 9 (large multifunctional peptidase 2) |
| 2903562 | 2903557 | 33348433  | 33348463  | 6 + | XM_371019    | LOC388339 | Similar to ribosomal protein S18                                                          |
| 2903569 | 2903557 | 33351747  | 33351821  | 6 + | CR611782     | RPS18     | Ribosomal protein S18                                                                     |
| 2903573 | 2903557 | 33352149  | 33352191  | 6 + | CR611782     | RPS18     | Ribosomal protein S18                                                                     |
| 2904166 | 2904129 | 34820310  | 34820411  | 6 + | BX640641     | C6orf107  | Chromosome 6 open reading frame 107                                                       |
| 2904703 | 2904683 | 35546338  | 35546443  | 6 + | AB082926     | RPL10A    | Ribosomal protein L10a                                                                    |
| 2907488 | 2907459 | 43013887  | 43013916  | 6 + | NM_006586    | TNRC5     | Trinucleotide repeat containing 5                                                         |
| 2908512 | 2908474 | 44329499  | 44329525  | 6 + | NM_007355    | HSP90AB1  | Heat shock protein 90kDa alpha (cytosolic), class B member 1                              |
| 2911307 | 2911303 | 57062938  | 57062963  | 6 + | BC021712     | ZNF451    | Zinc finger protein 451                                                                   |
| 2921303 | 2921296 | 111302929 | 111302955 | 6 + | AJ420527     | AMD1      | Adenosylmethionine decarboxylase 1                                                        |
| 2922230 | 2922215 | 114288990 | 114289565 | 6 + | NM_002356    | MARCKS    | Myristoylated alanine-rich protein kinase C substrate                                     |
| 2923062 | 2923060 | 118103351 | 118103378 | 6 + | NM_138459    | NUS1      | Nuclear undecaprenyl pyrophosphate synthase 1 homolog ( <i>S. cerevisiae</i> )            |
| 2927257 | 2927255 | 137185497 | 137185526 | 6 + | NM_000288    | PEX7      | Peroxisomal biogenesis factor 7                                                           |
| 2930813 | 2930808 | 149957112 | 149957140 | 6 + | NM_022551    | RPS18     | Ribosomal protein S18                                                                     |
| 2930816 | 2930808 | 149957373 | 149957407 | 6 + | NM_022551    | RPS18     | Ribosomal protein S18                                                                     |
| 2938990 | 2938972 | 2778879   | 2778932   | 6 - | NM_030666    | SERPINB1  | Serpin peptidase inhibitor, clade B (ovalbumin), member 1                                 |
| 2938991 | 2938972 | 2778946   | 2778973   | 6 - | NM_030666    | SERPINB1  | Serpin peptidase inhibitor, clade B (ovalbumin), member 1                                 |
| 2938992 | 2938972 | 2779071   | 2779215   | 6 - | NM_030666    | SERPINB1  | Serpin peptidase inhibitor, clade B (ovalbumin), member 1                                 |
| 2938996 | 2938972 | 2781350   | 2781461   | 6 - | CR610002     | SERPINB1  | Serpin peptidase inhibitor, clade B (ovalbumin), member 1                                 |
| 2938999 | 2938972 | 2783128   | 2783163   | 6 - | CR610002     | SERPINB1  | Serpin peptidase inhibitor, clade B (ovalbumin), member 1                                 |
| 2945504 | 2945440 | 24465958  | 24465985  | 6 - | AF181721     | DCDC2     | Doublecortin domain containing 2                                                          |
| 2948199 | 2948188 | 30151090  | 30151118  | 6 - | NM_170770    | RNF39     | Ring finger protein 39                                                                    |



|         |         |          |          |   |   |           |       |                                              |
|---------|---------|----------|----------|---|---|-----------|-------|----------------------------------------------|
| 2948632 | 2948630 | 30819103 | 30819605 | 6 | - | NM_003897 | IER3  | Immediate early response 3                   |
| 2948893 | 2948887 | 31344559 | 31344630 | 6 | - | BC008457  | HLA-B | Major histocompatibility complex, class I, B |
| 2948894 | 2948887 | 31344801 | 31344827 | 6 | - | CR625377  | HLA-B | Major histocompatibility complex, class I, B |
| 2948895 | 2948887 | 31344828 | 31344861 | 6 | - | CR625377  | HLA-B | Major histocompatibility complex, class I, B |
| 2948896 | 2948887 | 31344862 | 31344919 | 6 | - | CR625377  | HLA-B | Major histocompatibility complex, class I, B |
| 2948899 | 2948887 | 31345249 | 31345280 | 6 | - | BC008457  | HLA-B | Major histocompatibility complex, class I, B |
| 2948908 | 2948887 | 31346858 | 31346891 | 6 | - | CR626083  | HLA-B | Major histocompatibility complex, class I, B |
| 2948932 | 2948926 | 31429641 | 31429710 | 6 | - | AK124160  | HLA-B | Major histocompatibility complex, class I, B |
| 2948933 | 2948926 | 31429762 | 31429877 | 6 | - | AK124160  | HLA-B | Major histocompatibility complex, class I, B |
| 2948936 | 2948926 | 31430239 | 31430278 | 6 | - | X02494    | HLA-B | Major histocompatibility complex, class I, B |
| 2948938 | 2948926 | 31430391 | 31430418 | 6 | - | X02494    | HLA-B | Major histocompatibility complex, class I, B |
| 2948941 | 2948926 | 31430895 | 31430929 | 6 | - | X02494    | HLA-B | Major histocompatibility complex, class I, B |
| 2948951 | 2948926 | 31431952 | 31431985 | 6 | - | AK124160  | HLA-B | Major histocompatibility complex, class I, B |
| 2949119 | 2949118 | 31656412 | 31656453 | 6 | - | NM_002341 | LTB   | Lymphotoxin beta (TNF superfamily, member 3) |
| 2949260 | 2949256 | 31763259 | 31763292 | 6 | - | NM_021160 | BAT5  | HLA-B associated transcript 5                |
| 2949331 | 2949330 | 31806376 | 31806551 | 6 | - | NM_001288 | CLIC1 | Chloride intracellular channel 1             |
| 2949745 | 2949622 | 32196346 | 32196373 | 6 | - | BC008394  | TNXB  | Tenascin XB                                  |
| 2951151 | 2951150 | 34493267 | 34493302 | 6 | - | BC073799  | RPS10 | Ribosomal protein S10                        |
| 2951156 | 2951150 | 34494148 | 34494179 | 6 | - | BC073799  | RPS10 | Ribosomal protein S10                        |
| 2952103 | 2952102 | 37043964 | 37044204 | 6 | - | AF192559  | MTCH1 | Mitochondrial carrier homolog 1 (C. elegans) |

|         |         |           |           |   |   |           |          |                                                                          |
|---------|---------|-----------|-----------|---|---|-----------|----------|--------------------------------------------------------------------------|
| 2953585 | 2953570 | 41351774  | 41351837  | 6 | - | NM_018643 | TREM1    | Triggering receptor expressed on myeloid cells 1                         |
| 2953586 | 2953570 | 41351857  | 41351899  | 6 | - | NM_018643 | TREM1    | Triggering receptor expressed on myeloid cells 1                         |
| 2953587 | 2953570 | 41351921  | 41351946  | 6 | - | NM_018643 | TREM1    | Triggering receptor expressed on myeloid cells 1                         |
| 2954417 | 2954355 | 43128348  | 43128377  | 6 | - | NM_014780 | CUL7     | Cullin 7                                                                 |
| 2956776 | 2956759 | 50988516  | 50988615  | 6 | - | NR_002203 |          | Homo sapiens ferritin, heavy polypeptide-like 8 (FTHL8) on chromosome X. |
| 2960868 | 2960867 | 74139400  | 74139472  | 6 | - | NM_001000 | RPL39    | Ribosomal protein L39                                                    |
| 2960909 | 2960903 | 74284051  | 74284211  | 6 | - | NM_001402 | EEF1A1   | Eukaryotic translation elongation factor 1 alpha 1                       |
| 2960911 | 2960903 | 74284254  | 74284284  | 6 | - | NM_001402 | EEF1A1   | Eukaryotic translation elongation factor 1 alpha 1                       |
| 2960912 | 2960903 | 74284285  | 74284310  | 6 | - | NM_001402 | EEF1A1   | Eukaryotic translation elongation factor 1 alpha 1                       |
| 2960913 | 2960903 | 74284324  | 74284377  | 6 | - | NM_001402 | EEF1A1   | Eukaryotic translation elongation factor 1 alpha 1                       |
| 2960915 | 2960903 | 74284474  | 74284517  | 6 | - | CR594643  | EEF1A1   | Eukaryotic translation elongation factor 1 alpha 1                       |
| 2960916 | 2960903 | 74284652  | 74284681  | 6 | - | CR598396  | EEF1A1   | Eukaryotic translation elongation factor 1 alpha 1                       |
| 2960918 | 2960903 | 74284844  | 74284874  | 6 | - | CR598396  | EEF1A1   | Eukaryotic translation elongation factor 1 alpha 1                       |
| 2960919 | 2960903 | 74284942  | 74284984  | 6 | - | CR598396  | EEF1A1   | Eukaryotic translation elongation factor 1 alpha 1                       |
| 2960920 | 2960903 | 74284999  | 74285046  | 6 | - | CR598396  | EEF1A1   | Eukaryotic translation elongation factor 1 alpha 1                       |
| 2961302 | 2961300 | 76004274  | 76004356  | 6 | - | NM_001865 | COX7A2   | Cytochrome c oxidase subunit VIIa polypeptide 2 (liver)                  |
| 2962044 | 2962026 | 80303565  | 80303595  | 6 | - | NM_181714 | C6orf152 | Chromosome 6 open reading frame 152                                      |
| 2969537 | 2969467 | 111243102 | 111243128 | 6 | - | NM_015076 | CDC2L6   | Cell division cycle 2-like 6 (CDK8-like)                                 |
| 2974534 | 2974469 | 132875856 | 132875885 | 6 | - | NM_003569 | STX7     | Syntaxin 7                                                               |

|         |         |           |           |   |   |              |           |                                                                                         |
|---------|---------|-----------|-----------|---|---|--------------|-----------|-----------------------------------------------------------------------------------------|
| 2980367 | 2980366 | 153645079 | 153645113 | 6 | - | XM_371853    | LOC389435 | Similar to 60S ribosomal protein L27a                                                   |
| 2980369 | 2980366 | 153645229 | 153645312 | 6 | - | XM_371853    | LOC389435 | Similar to 60S ribosomal protein L27a                                                   |
| 2981875 | 2981874 | 158977679 | 158977792 | 6 | - | AK026669     | DYNLT1    | Dynein, light chain, Tctex-type 1                                                       |
| 2982321 | 2982319 | 160020256 | 160020283 | 6 | - | NM_001024466 | SOD2      | Superoxide dismutase 2, mitochondrial                                                   |
| 2982322 | 2982319 | 160020284 | 160020320 | 6 | - | NM_001024466 | SOD2      | Superoxide dismutase 2, mitochondrial                                                   |
| 2982327 | 2982319 | 160023524 | 160023630 | 6 | - | NM_000636    | SOD2      | Superoxide dismutase 2, mitochondrial                                                   |
| 2982329 | 2982319 | 160025897 | 160026048 | 6 | - | NM_000636    | SOD2      | Superoxide dismutase 2, mitochondrial                                                   |
| 2982331 | 2982319 | 160029163 | 160029262 | 6 | - | X15132       | SOD2      | Superoxide dismutase 2, mitochondrial                                                   |
| 2985839 | 2985781 | 169379337 | 169379366 | 6 | - | NM_003247    | THBS2     | Thrombospondin 2                                                                        |
| 2989070 | 2989050 | 6406282   | 6406342   | 7 | + | NM_198829    | RAC1      | Ras-related C3 botulinum toxin substrate 1 (rho family, small GTP binding protein Rac1) |
| 2989076 | 2989050 | 6408483   | 6408558   | 7 | + | NM_198829    | RAC1      | Ras-related C3 botulinum toxin substrate 1 (rho family, small GTP binding protein Rac1) |
| 2989077 | 2989050 | 6408635   | 6408730   | 7 | + | NM_198829    | RAC1      | Ras-related C3 botulinum toxin substrate 1 (rho family, small GTP binding protein Rac1) |
| 2992248 | 2992243 | 21549502  | 21549529  | 7 | + | NM_003777    | DNAH11    | Dynein, axonemal, heavy chain 11                                                        |
| 2998549 | 2998536 | 39957155  | 39957209  | 7 | + | NM_003718    | CDC2L5    | Cell division cycle 2-like 5 (cholinesterase-related cell division controller)          |
| 2999910 | 2999906 | 44474304  | 44474333  | 7 | + | NM_000994    | RPL32     | Ribosomal protein L32                                                                   |
| 3000087 | 3000073 | 44805867  | 44805926  | 7 | + | XM_929754    | FHIT      | Fragile histidine triad gene                                                            |
| 3000091 | 3000073 | 44807423  | 44807456  | 7 | + | NM_021130    | PPIA      | Peptidylprolyl isomerase A (cyclophilin A)                                              |
| 3000093 | 3000073 | 44807683  | 44807716  | 7 | + | NM_021130    | PPIA      | Peptidylprolyl isomerase A (cyclophilin A)                                              |

|         |         |           |           |   |   |                 |         |                                                                                                  |
|---------|---------|-----------|-----------|---|---|-----------------|---------|--------------------------------------------------------------------------------------------------|
| 3008237 | 3008220 | 73406147  | 73406262  | 7 | + | NM_003388       | CYLN2   | Cytoplasmic linker 2                                                                             |
| 3009961 | 3009959 | 77004695  | 77004722  | 7 | + | NM_002835       | PTPN12  | Protein tyrosine phosphatase, non-receptor type 12                                               |
| 3014252 | 3014229 | 97758434  | 97758491  | 7 | + | NM_015379       | BRI3    | Brain protein I3                                                                                 |
| 3014254 | 3014229 | 97758587  | 97758624  | 7 | + | NM_015379       | BRI3    | Brain protein I3                                                                                 |
| 3014255 | 3014229 | 97758633  | 97758664  | 7 | + | NM_015379       | BRI3    | Brain protein I3                                                                                 |
| 3014256 | 3014229 | 97758673  | 97758699  | 7 | + | NM_015379       | BRI3    | Brain protein I3                                                                                 |
| 3014739 | 3014714 | 98830062  | 98830219  | 7 | + | NM_005720       | ARPC1B  | Actin related protein 2/3 complex, subunit 1B, 41kDa                                             |
| 3015161 | 3015147 | 99460367  | 99460439  | 7 | + | AY260738        | ZKSCAN1 | Zinc finger with KRAB and SCAN domains 1                                                         |
| 3015606 | 3015603 | 99974908  | 99975009  | 7 | + | NM_006076       | HRBL    | HIV-1 Rev binding protein-like                                                                   |
| 3022421 | 3022409 | 127018648 | 127018972 | 7 | + | NM_001662       | ARF5    | ADP-ribosylation factor 5                                                                        |
| 3023321 | 3023318 | 128572096 | 128572130 | 7 | + | NM_178562       | TSPAN33 | Tetraspanin 33                                                                                   |
| 3026348 | 3026345 | 136849464 | 136849491 | 7 | + | ENST00000314842 |         | ribosomal protein L41 (RPL41), transcript variant 2, mRNA gene:ENSG00000176534                   |
| 3026990 | 3026988 | 138695220 | 138695257 | 7 | + | BC042625        | LUC7L2  | LUC7-like 2 ( <i>S. cerevisiae</i> )                                                             |
| 3028945 | 3028934 | 142546306 | 142546404 | 7 | + | NM_002652       | PIP     | Prolactin-induced protein                                                                        |
| 3028948 | 3028934 | 142546861 | 142546904 | 7 | + | BC010951        | PIP     | Prolactin-induced protein                                                                        |
| 3031496 | 3031466 | 149805577 | 149805607 | 7 | + | NM_175571       | GIMAP8  | GTPase, IMAP family member 8                                                                     |
| 3032244 | 3032243 | 151353810 | 151353838 | 7 | + | NM_022087       | GALNT11 | UDP-N-acetyl-alpha-D-galactosamine:polypeptide N-acetylgalactosaminyltransferase 11 (GalNAc-T11) |
| 3036928 | 3036924 | 5533926   | 5534040   | 7 | - | NM_001101       | ACTB    | Actin, beta                                                                                      |
| 3036937 | 3036924 | 5535384   | 5535535   | 7 | - | NM_001101       | ACTB    | Actin, beta                                                                                      |
| 3037297 | 3037251 | 6278630   | 6278663   | 7 | - | NM_004227       | PSCD3   | Pleckstrin homology, Sec7 and coiled-coil domains 3                                              |
| 3038619 | 3038617 | 10939644  | 10939745  | 7 | - | NM_002489       | NDUFA4  | NADH dehydrogenase (ubiquinone) 1 alpha subcomplex, 4, 9kDa                                      |
| 3038620 | 3038617 | 10939796  | 10939844  | 7 | - | NM_002489       | NDUFA4  | NADH dehydrogenase (ubiquinone) 1 alpha subcomplex, 4, 9kDa                                      |
| 3038624 | 3038617 | 10944980  | 10945032  | 7 | - | NM_002489       | NDUFA4  | NADH dehydrogenase (ubiquinone) 1 alpha subcomplex, 4, 9kDa                                      |

|         |         |          |          |     |           |           |                                                               |
|---------|---------|----------|----------|-----|-----------|-----------|---------------------------------------------------------------|
| 3041173 | 3041172 | 22516497 | 22516645 | 7 - | AK222523  | EEF1A1    | Eukaryotic translation elongation factor 1 alpha 1            |
| 3041174 | 3041172 | 22516693 | 22516737 | 7 - | NM_001402 | EEF1A1    | Eukaryotic translation elongation factor 1 alpha 1            |
| 3041175 | 3041172 | 22516765 | 22516795 | 7 - | NM_001402 | EEF1A1    | Eukaryotic translation elongation factor 1 alpha 1            |
| 3041176 | 3041172 | 22516796 | 22516825 | 7 - | NM_001402 | EEF1A1    | Eukaryotic translation elongation factor 1 alpha 1            |
| 3041177 | 3041172 | 22516860 | 22516907 | 7 - | NM_001402 | EEF1A1    | Eukaryotic translation elongation factor 1 alpha 1            |
| 3041178 | 3041172 | 22516960 | 22516994 | 7 - | NM_001402 | EEF1A1    | Eukaryotic translation elongation factor 1 alpha 1            |
| 3041180 | 3041172 | 22517160 | 22517192 | 7 - | NM_001402 | EEF1A1    | Eukaryotic translation elongation factor 1 alpha 1            |
| 3041181 | 3041172 | 22517260 | 22517302 | 7 - | NM_001402 | EEF1A1    | Eukaryotic translation elongation factor 1 alpha 1            |
| 3041182 | 3041172 | 22517340 | 22517508 | 7 - | NM_001402 | EEF1A1    | Eukaryotic translation elongation factor 1 alpha 1            |
| 3041184 | 3041172 | 22517634 | 22517713 | 7 - | NM_001402 | EEF1A1    | Eukaryotic translation elongation factor 1 alpha 1            |
| 3041262 | 3041260 | 22819169 | 22819203 | 7 - | NM_019059 | TOMM7     | Translocase of outer mitochondrial membrane 7 homolog (yeast) |
| 3041524 | 3041519 | 23512362 | 23512410 | 7 - | NM_013293 | TRA2A     | Transformer-2 alpha                                           |
| 3061018 | 3060994 | 91601537 | 91601572 | 7 - | NM_000786 | CYP51A1   | Cytochrome P450, family 51, subfamily A, polypeptide 1        |
| 3062389 | 7385696 | 96162047 | 96162112 | 7 - | NM_006304 | SHFM1     | Split hand/foot malformation (ectrodactyly) type 1            |
| 3062398 | 7385696 | 96176954 | 96176982 | 7 - | NM_006304 | SHFM1     | Split hand/foot malformation (ectrodactyly) type 1            |
| 3062954 | 3062953 | 97853076 | 97853118 | 7 - | XM_495839 | LOC439992 | Similar to ribosomal protein S3a                              |
| 3062956 | 3062953 | 97853274 | 97853312 | 7 - | XM_495839 | LOC439992 | Similar to ribosomal protein S3a                              |
| 3062958 | 3062953 | 97853415 | 97853450 | 7 - | XM_927103 | LOC400652 | Similar to 40S ribosomal protein S3a                          |

|         |         |           |           |   |   |                    |          |                                                                            |
|---------|---------|-----------|-----------|---|---|--------------------|----------|----------------------------------------------------------------------------|
| 3062959 | 3062953 | 97853483  | 97853528  | 7 | - | NM_001006          | RPS3A    | Ribosomal protein S3A                                                      |
| 3064471 | 3064462 | 100593767 | 100593802 | 7 | - | NM_003378          | VGF      | VGF nerve growth factor inducible                                          |
| 3066826 | 3066818 | 105678367 | 105678398 | 7 | - | NM_005746          | PBEF1    | Pre-B-cell colony enhancing factor 1                                       |
| 3066827 | 3066818 | 105678429 | 105678680 | 7 | - | NM_005746          | PBEF1    | Pre-B-cell colony enhancing factor 1                                       |
| 3066828 | 3066818 | 105678818 | 105678867 | 7 | - | NM_005746          | PBEF1    | Pre-B-cell colony enhancing factor 1                                       |
| 3066832 | 3066818 | 105680736 | 105680812 | 7 | - | NM_005746          | PBEF1    | Pre-B-cell colony enhancing factor 1                                       |
| 3066834 | 3066818 | 105682062 | 105682150 | 7 | - | NM_005746          | PBEF1    | Pre-B-cell colony enhancing factor 1                                       |
| 3066842 | 3066818 | 105689295 | 105689355 | 7 | - | NM_005746          | PBEF1    | Pre-B-cell colony enhancing factor 1                                       |
| 3066845 | 3066818 | 105691075 | 105691233 | 7 | - | NM_005746          | PBEF1    | Pre-B-cell colony enhancing factor 1                                       |
| 3073748 | 3073747 | 132369843 | 132369874 | 7 | - | NM_001404          | EEF1G    | Eukaryotic translation elongation factor 1 gamma                           |
| 3073755 | 3073747 | 132370720 | 132370797 | 7 | - | NM_001404          | EEF1G    | Eukaryotic translation elongation factor 1 gamma                           |
| 3082551 | 3082531 | 347038    | 347066    | 8 | + | NM_183421          | FBXO25   | F-box protein 25                                                           |
| 3088569 | 3088544 | 20122565  | 20123288  | 8 | + | NM_001693          | ATP6V1B2 | ATPase, H+ transporting, lysosomal 56/58kDa, V1 subunit B2                 |
| 3091360 | 3091301 | 27364245  | 27364312  | 8 | + | NM_173176          | PTK2B    | PTK2B protein tyrosine kinase 2 beta                                       |
| 3091810 | 3091797 | 28629511  | 28629538  | 8 | + | NM_001440          | EXTL3    | Exostoses (multiple)-like 3                                                |
| 3129950 | 3129948 | 30040317  | 30040832  | 8 | - | NM_016127          | TMEM66   | Transmembrane protein 66                                                   |
| 3135250 | 3135184 | 53789218  | 53789245  | 8 | - | NM_014781          | RB1CC1   | RB1-inducible coiled-coil 1                                                |
| 3136139 | 3136129 | 57148300  | 57148369  | 8 | - | NM_001023          | RPS20    | Ribosomal protein S20                                                      |
| 3136141 | 3136129 | 57148845  | 57148877  | 8 | - | ENSESTT00000029711 | RPS20    | Ribosomal protein S20                                                      |
| 3136145 | 3136129 | 57149192  | 57149248  | 8 | - | NM_001023          | RPS20    | Ribosomal protein S20                                                      |
| 3140840 | 3140833 | 75021441  | 75021472  | 8 | - | BC093065           | TCEB1    | Transcription elongation factor B (SIII), polypeptide 1 (15kDa, elongin C) |
| 3145569 | 3145567 | 97312365  | 97312458  | 8 | - | NM_006294          | UQCRB    | Ubiquinol-cytochrome c reductase binding protein                           |
| 3145955 | 3145953 | 99123156  | 99123186  | 8 | - | NM_000989          | RPL30    | Ribosomal protein L30                                                      |
| 3145956 | 3145953 | 99123206  | 99123254  | 8 | - | NM_000989          | RPL30    | Ribosomal protein L30                                                      |
| 3145960 | 3145953 | 99124050  | 99124075  | 8 | - | NM_000989          | RPL30    | Ribosomal protein L30                                                      |
| 3146442 | 3146433 | 100968949 | 100969022 | 8 | - | NM_004374          | COX6C    | Cytochrome c oxidase subunit VIc                                           |
| 3146788 | 3146781 | 101784417 | 101784630 | 8 | - | NM_030979          | PABPC3   | Poly(A) binding protein, cytoplasmic 3                                     |
| 3146789 | 3146781 | 101784685 | 101784761 | 8 | - | NM_002568          | PABPC1   | Poly(A) binding protein, cytoplasmic 1                                     |
| 3146791 | 3146781 | 101785704 | 101785790 | 8 | - | NM_030979          | PABPC3   | Poly(A) binding protein, cytoplasmic 3                                     |
| 3146793 | 3146781 | 101786331 | 101786434 | 8 | - | NM_030979          | PABPC3   | Poly(A) binding protein, cytoplasmic 3                                     |

|         |         |           |           |   |   |           |           |                                                                                          |
|---------|---------|-----------|-----------|---|---|-----------|-----------|------------------------------------------------------------------------------------------|
| 3146794 | 3146781 | 101786994 | 101787058 | 8 | - | NM_030979 | PABPC3    | Poly(A) binding protein, cytoplasmic 3                                                   |
| 3146795 | 3146781 | 101788118 | 101788190 | 8 | - | NM_030979 | PABPC3    | Poly(A) binding protein, cytoplasmic 3                                                   |
| 3146799 | 3146781 | 101790541 | 101790621 | 8 | - | NM_030979 | PABPC3    | Poly(A) binding protein, cytoplasmic 3                                                   |
| 3146802 | 3146781 | 101791079 | 101791134 | 8 | - | NM_030979 | PABPC3    | Poly(A) binding protein, cytoplasmic 3                                                   |
| 3146903 | 3146898 | 102000092 | 102000125 | 8 | - | NM_003406 | YWHAZ     | Tyrosine 3-monooxygenase/tryptophan 5-monooxygenase activation protein, zeta polypeptide |
| 3148927 | 3148871 | 110772833 | 110772862 | 8 | - | AK000373  | FLJ20366  | Hypothetical protein FLJ20366                                                            |
| 3154318 | 3154317 | 134318629 | 134318717 | 8 | - | NM_006096 | NDRG1     | N-myc downstream regulated gene 1                                                        |
| 3156710 | 3156655 | 142586359 | 142586406 | 8 | - | NM_207414 | FLJ43860  | FLJ43860 protein                                                                         |
| 3157597 | 3157596 | 144733106 | 144733136 | 8 | - | XM_058967 | LOC126037 | Similar to Elongation factor 1-delta (EF-1-delta) (Antigen NY-CO-4)                      |
| 3157605 | 3157596 | 144734542 | 144734598 | 8 | - | XM_058967 | LOC126037 | Similar to Elongation factor 1-delta (EF-1-delta) (Antigen NY-CO-4)                      |
| 3157794 | 3157751 | 144962767 | 144962794 | 8 | - | NM_182706 | SCRIB     | Scribbled homolog (Drosophila)                                                           |
| 3159041 | 3159040 | 145986002 | 145986057 | 8 | - | CR623747  | RPL8      | Ribosomal protein L8                                                                     |
| 3159042 | 3159040 | 145986065 | 145986135 | 8 | - | CR623747  | RPL8      | Ribosomal protein L8                                                                     |
| 3159044 | 3159040 | 145986544 | 145986650 | 8 | - | NM_000973 | RPL8      | Ribosomal protein L8                                                                     |
| 3159050 | 3159040 | 145987512 | 145987537 | 8 | - | NM_000973 | RPL8      | Ribosomal protein L8                                                                     |
| 3174832 | 3174816 | 74964069  | 74964142  | 9 | + | NM_000700 | ANXA1     | Annexin A1                                                                               |
| 3174835 | 3174816 | 74965024  | 74965110  | 9 | + | NM_000700 | ANXA1     | Annexin A1                                                                               |
| 3174836 | 3174816 | 74965556  | 74965627  | 9 | + | NM_000700 | ANXA1     | Annexin A1                                                                               |
| 3174838 | 3174816 | 74967521  | 74967590  | 9 | + | NM_000700 | ANXA1     | Annexin A1                                                                               |
| 3174840 | 3174816 | 74968213  | 74968244  | 9 | + | NM_000700 | ANXA1     | Annexin A1                                                                               |
| 3174845 | 3174816 | 74969882  | 74969913  | 9 | + | NM_000700 | ANXA1     | Annexin A1                                                                               |
| 3174847 | 3174816 | 74970846  | 74970905  | 9 | + | NM_000700 | ANXA1     | Annexin A1                                                                               |
| 3174850 | 3174816 | 74972233  | 74972259  | 9 | + | NM_000700 | ANXA1     | Annexin A1                                                                               |
| 3174853 | 3174816 | 74973780  | 74973887  | 9 | + | NM_000700 | ANXA1     | Annexin A1                                                                               |
| 3174856 | 3174816 | 74974787  | 74974838  | 9 | + | NM_000700 | ANXA1     | Annexin A1                                                                               |
| 3174857 | 3174816 | 74974844  | 74974970  | 9 | + | NM_000700 | ANXA1     | Annexin A1                                                                               |
| 3177565 | 3177563 | 87745891  | 87745965  | 9 | + | NM_024635 | MAK10     | MAK10 homolog, amino-acid N-acetyltransferase subunit, ( <i>S. cerevisiae</i> )          |

|         |         |           |           |     |              |          |                                                          |
|---------|---------|-----------|-----------|-----|--------------|----------|----------------------------------------------------------|
| 3178482 | 3178480 | 90339839  | 90339865  | 9 + | NM_145283    | C9orf121 | Chromosome 9 open reading frame 121                      |
| 3181304 | 3181302 | 99435985  | 99436018  | 9 + | NM_002486    | NCBP1    | Nuclear cap binding protein subunit 1, 80kDa             |
| 3184980 | 3184940 | 113472202 | 113472301 | 9 + | NM_001017998 | GNG10    | Guanine nucleotide binding protein (G protein), gamma 10 |
| 3186504 | 3186491 | 117956216 | 117956250 | 9 + | NM_002581    | PAPPA    | Pregnancy-associated plasma protein A, pappalysin 1      |
| 3190334 | 3190331 | 130103573 | 130103765 | 9 + | AK025326     |          | Homo sapiens cDNA: FLJ21673 fis, clone COL09042.         |
| 3192647 | 3192640 | 134885536 | 134885578 | 9 + | NM_001402    | EEF1A1   | Eukaryotic translation elongation factor 1 alpha 1       |
| 3192648 | 3192640 | 134885646 | 134885676 | 9 + | NM_001402    | EEF1A1   | Eukaryotic translation elongation factor 1 alpha 1       |
| 3192649 | 3192640 | 134885739 | 134885778 | 9 + | NM_001402    | EEF1A1   | Eukaryotic translation elongation factor 1 alpha 1       |
| 3192650 | 3192640 | 134885844 | 134885878 | 9 + | NM_001402    | EEF1A1   | Eukaryotic translation elongation factor 1 alpha 1       |
| 3192651 | 3192640 | 134885931 | 134885978 | 9 + | NM_001402    | EEF1A1   | Eukaryotic translation elongation factor 1 alpha 1       |
| 3192652 | 3192640 | 134886115 | 134886281 | 9 + | NM_001402    | EEF1A1   | Eukaryotic translation elongation factor 1 alpha 1       |
| 3193533 | 3193482 | 136782234 | 136782270 | 9 + | NM_000093    | COL5A1   | Collagen, type V, alpha 1                                |
| 3193727 | 3193725 | 137107374 | 137107399 | 9 + | NM_014279    | OLFM1    | Olfactomedin 1                                           |
| 3193892 | 3193870 | 137519331 | 137519357 | 9 + | NM_014811    | KIAA0649 | KIAA0649                                                 |
| 3195224 | 3195174 | 139122876 | 139122907 | 9 + | NM_016219    | MAN1B1   | Mannosidase, alpha, class 1B, member 1                   |
| 3199683 | 3199662 | 15175405  | 15175442  | 9 - | BC038592     | C9orf52  | Chromosome 9 open reading frame 52                       |
| 3200715 | 3200689 | 19366291  | 19366316  | 9 - | CR599051     | RPS6     | Ribosomal protein S6                                     |
| 3200716 | 3200689 | 19366336  | 19366365  | 9 - | CR599051     | RPS6     | Ribosomal protein S6                                     |
| 3200718 | 3200689 | 19366535  | 19366564  | 9 - | CR599051     | RPS6     | Ribosomal protein S6                                     |
| 3200719 | 3200689 | 19366588  | 19366617  | 9 - | CR599051     | RPS6     | Ribosomal protein S6                                     |
| 3200724 | 3200689 | 19368461  | 19368490  | 9 - | CR599051     | RPS6     | Ribosomal protein S6                                     |
| 3200725 | 3200689 | 19368719  | 19368755  | 9 - | CR599051     | RPS6     | Ribosomal protein S6                                     |



|         |         |           |           |    |   |              |           |                                                                                          |
|---------|---------|-----------|-----------|----|---|--------------|-----------|------------------------------------------------------------------------------------------|
| 3200726 | 3200689 | 19368811  | 19368907  | 9  | - | CR599051     | RPS6      | Ribosomal protein S6                                                                     |
| 3203490 | 3203482 | 33245101  | 33245183  | 9  | - | NM_004323    | BAG1      | BCL2-associated athanogene                                                               |
| 3205034 | 3205033 | 35961161  | 35961320  | 9  | - | BC071708     | YBX1      | Y box binding protein 1                                                                  |
| 3205037 | 3205033 | 35961644  | 35961672  | 9  | - | BC071708     | YBX1      | Y box binding protein 1                                                                  |
| 3220162 | 3220156 | 112046893 | 112046938 | 9  | - | NM_003329    | TXN       | Thioredoxin                                                                              |
| 3220876 | 3220846 | 113844015 | 113844043 | 9  | - | NM_022486    | SUSD1     | Sushi domain containing 1                                                                |
| 3224174 | 3224087 | 123895304 | 123895333 | 9  | - | NM_194252    | TTL11     | Tubulin tyrosine ligase-like family, member 11                                           |
| 3225005 | 3225003 | 126155657 | 126155689 | 9  | - | NM_002799    | PSMB7     | Proteasome (prosome, macropain) subunit, beta type, 7                                    |
| 3225400 | 3225398 | 127038358 | 127038411 | 9  | - | NM_005347    | HSPA5     | Heat shock 70kDa protein 5 (glucose-regulated protein, 78kDa)                            |
| 3225933 | 3225930 | 129250006 | 129250063 | 9  | - | AK057602     | RPL12     | Ribosomal protein L12                                                                    |
| 3225935 | 3225930 | 129250445 | 129250480 | 9  | - | NM_000976    | RPL12     | Ribosomal protein L12                                                                    |
| 3225939 | 3225930 | 129251395 | 129251438 | 9  | - | XM_929836    | LOC646875 | Similar to 60S ribosomal protein L12                                                     |
| 3225940 | 3225930 | 129251746 | 129251775 | 9  | - | AK057602     | RPL12     | Ribosomal protein L12                                                                    |
| 3225959 | 3225952 | 129309378 | 129309410 | 9  | - | NM_001035534 | FAM129B   | Family with sequence similarity 129, member B                                            |
| 3230532 | 3230530 | 138954740 | 138954828 | 9  | - | NM_018998    | FBXW5     | F-box and WD-40 domain protein 5                                                         |
| 3233651 | 3233605 | 6306140   | 6306178   | 10 | + | NM_004566    | PFKFB3    | 6-phosphofructo-2-kinase/fructose-2,6-biphosphatase 3                                    |
| 3246403 | 3246372 | 51260436  | 51260467  | 10 | + | NM_005437    | NCOA4     | Nuclear receptor coactivator 4                                                           |
| 3246404 | 3246372 | 51260537  | 51260603  | 10 | + | NM_005437    | NCOA4     | Nuclear receptor coactivator 4                                                           |
| 3249591 | 3249587 | 69314726  | 69314758  | 10 | + | NM_012238    | SIRT1     | Sirtuin (silent mating type information regulation 2 homolog) 1 ( <i>S. cerevisiae</i> ) |
| 3250158 | 3250146 | 70526851  | 70526913  | 10 | + | NM_002727    | PRG1      | Proteoglycan 1, secretory granule                                                        |
| 3250159 | 3250146 | 70526934  | 70526989  | 10 | + | NM_002727    | PRG1      | Proteoglycan 1, secretory granule                                                        |
| 3250160 | 3250146 | 70533639  | 70533771  | 10 | + | NM_002727    | PRG1      | Proteoglycan 1, secretory granule                                                        |
| 3250161 | 3250146 | 70533772  | 70533837  | 10 | + | NM_002727    | PRG1      | Proteoglycan 1, secretory granule                                                        |
| 3250162 | 3250146 | 70533887  | 70534419  | 10 | + | NM_002727    | PRG1      | Proteoglycan 1, secretory granule                                                        |
| 3250163 | 3250146 | 70534505  | 70534531  | 10 | + | NM_002727    | PRG1      | Proteoglycan 1, secretory granule                                                        |
| 3253447 | 3253438 | 79466984  | 79467061  | 10 | + | NM_001026    | RPS24     | Ribosomal protein S24                                                                    |
| 3253453 | 3253438 | 79470416  | 79470444  | 10 | + | NM_001026    | RPS24     | Ribosomal protein S24                                                                    |

|         |         |           |           |    |   |                    |           |                                                                                           |
|---------|---------|-----------|-----------|----|---|--------------------|-----------|-------------------------------------------------------------------------------------------|
| 3253902 | 3253880 | 80783683  | 80784289  | 10 | + | NM_005729          | PPIF      | Peptidylprolyl isomerase F (cyclophilin F)                                                |
| 3256259 | 3256221 | 88772051  | 88772111  | 10 | + | GENSCAN00000054464 |           | cdna:Genscan<br>chromosome:NCBI36:10:88717948:8877<br>6340:1                              |
| 3256261 | 3256221 | 88774347  | 88774374  | 10 | + | GENSCAN00000054464 |           | cdna:Genscan<br>chromosome:NCBI36:10:88717948:8877<br>6340:1                              |
| 3256262 | 3256221 | 88774412  | 88774465  | 10 | + | XM_001127396       |           | PREDICTED: Homo sapiens hypothetical<br>protein LOC728122 (LOC728122), mRNA.              |
| 3259405 | 3259400 | 97794100  | 97794130  | 10 | + | NM_019084          | CCNJ      | Cyclin J                                                                                  |
| 3259619 | 3259610 | 98500523  | 98500594  | 10 | + | NM_012423          | RPL13A    | Ribosomal protein L13a                                                                    |
| 3260751 | 3260700 | 102495945 | 102495977 | 10 | + | NM_003987          | PAX2      | Paired box gene 2                                                                         |
| 3263978 | 3263944 | 112648079 | 112648464 | 10 | + | BX537500           | PDCD4     | Programmed cell death 4 (neoplastic<br>transformation inhibitor)                          |
| 3273181 | 3273178 | 82997     | 83025     | 10 | - | XM_932717          | LOC643224 | Similar to tubulin, beta 8                                                                |
| 3275141 | 3275132 | 5847204   | 5847260   | 10 | - | NM_001494          | GDI2      | GDP dissociation inhibitor 2                                                              |
| 3293356 | 3293341 | 71806296  | 71806333  | 10 | - | NM_207119          | LRRC20    | Leucine rich repeat containing 20                                                         |
| 3293764 | 3293762 | 73246113  | 73246221  | 10 | - | NM_001042465       | PSAP      | Prosaposin (variant Gaucher disease and<br>variant metachromatic leukodystrophy)          |
| 3293765 | 3293762 | 73246258  | 73246301  | 10 | - | NM_001042465       | PSAP      | Prosaposin (variant Gaucher disease and<br>variant metachromatic leukodystrophy)          |
| 3293766 | 3293762 | 73246385  | 73246464  | 10 | - | NM_001042465       | PSAP      | Prosaposin (variant Gaucher disease and<br>variant metachromatic leukodystrophy)          |
| 3296285 | 3296046 | 79067338  | 79067406  | 10 | - | NM_001014797       | KCNMA1    | Potassium large conductance calcium-<br>activated channel, subfamily M, alpha<br>member 1 |
| 3297685 | 3297666 | 82106448  | 82106479  | 10 | - | NM_138812          | DYDC1     | DPY30 domain containing 1                                                                 |
| 3299755 | 3299705 | 91394964  | 91395039  | 10 | - | NM_148977          | PANK1     | Pantothenate kinase 1                                                                     |

|         |         |           |           |    |   |                    |           |                                                                   |
|---------|---------|-----------|-----------|----|---|--------------------|-----------|-------------------------------------------------------------------|
| 3300871 | 3300869 | 95708487  | 95708520  | 10 | - | NM_002810          | PSMD4     | Proteasome (prosome, macropain) 26S subunit, non-ATPase, 4        |
| 3304748 | 3304746 | 105138821 | 105138885 | 10 | - | AJ272056           | USMG5     | Upregulated during skeletal muscle growth 5 homolog (mouse)       |
| 3309382 | 3309345 | 120915156 | 120915194 | 10 | - | NM_178867          | SFXN4     | Sideroflexin 4                                                    |
| 3309937 | 3309936 | 122104208 | 122104267 | 10 | - | XM_370611          | LOC387753 | Similar to 60S ribosomal protein L21                              |
| 3309938 | 3309936 | 122104287 | 122104378 | 10 | - | XM_370611          | LOC387753 | Similar to 60S ribosomal protein L21                              |
| 3315670 | 3315658 | 299026    | 299061    | 11 | + | BC009696           | IFITM2    | Interferon induced transmembrane protein 2 (1-8D)                 |
| 3315671 | 3315658 | 299088    | 299124    | 11 | + | BC009696           | IFITM2    | Interferon induced transmembrane protein 2 (1-8D)                 |
| 3315673 | 3315658 | 299200    | 299293    | 11 | + | BC009696           | IFITM2    | Interferon induced transmembrane protein 2 (1-8D)                 |
| 3315674 | 3315658 | 299323    | 299369    | 11 | + | BC009696           | IFITM2    | Interferon induced transmembrane protein 2 (1-8D)                 |
| 3315685 | 3315675 | 305048    | 305085    | 11 | + | NM_003641          | IFITM1    | Interferon induced transmembrane protein 1 (9-27)                 |
| 3315687 | 3315675 | 305193    | 305257    | 11 | + | NM_003641          | IFITM1    | Interferon induced transmembrane protein 1 (9-27)                 |
| 3316227 | 3316208 | 754911    | 755008    | 11 | + | NM_006755          | TALDO1    | Transaldolase 1                                                   |
| 3316284 | 3316267 | 802539    | 802591    | 11 | + | NM_001004          | TSPAN4    | Tetraspanin 4                                                     |
| 3316286 | 3316267 | 802763    | 802826    | 11 | + | NM_001004          | TSPAN4    | Tetraspanin 4                                                     |
| 3319604 | 3319586 | 8662947   | 8663015   | 11 | + | ENSESTT00000033787 | RPL27A    | Ribosomal protein L27a                                            |
| 3319610 | 3319586 | 8663833   | 8663899   | 11 | + | NM_000990          | RPL27A    | Ribosomal protein L27a                                            |
| 3321272 | 3321269 | 13646843  | 13646889  | 11 | + | AK026381           | MLSTD2    | Male sterility domain containing 2                                |
| 3322526 | 3322521 | 17714444  | 17714473  | 11 | + | NM_004976          | KCNC1     | Potassium voltage-gated channel, Shaw-related subfamily, member 1 |
| 3322802 | 3322775 | 18385365  | 18385404  | 11 | + | NM_005566          | LDHA      | Lactate dehydrogenase A                                           |
| 3322803 | 3322775 | 18385448  | 18385477  | 11 | + | NM_005566          | LDHA      | Lactate dehydrogenase A                                           |
| 3322805 | 3322775 | 18385589  | 18385617  | 11 | + | NM_005566          | LDHA      | Lactate dehydrogenase A                                           |
| 3322965 | 3322958 | 19095373  | 19095399  | 11 | + | NM_001001483       | ZDHHC13   | Zinc finger, DHHC-type containing 13                              |
| 3329071 | 3329069 | 45863948  | 45864038  | 11 | + | NM_005456          | MAPK8IP1  | Mitogen-activated protein kinase 8 interacting protein 1          |

|         |         |          |          |    |   |           |          |                                                                                 |
|---------|---------|----------|----------|----|---|-----------|----------|---------------------------------------------------------------------------------|
| 3329260 | 3329247 | 46323608 | 46323651 | 11 | + | NM_201533 | DGKZ     | Diacylglycerol kinase, zeta 104kDa                                              |
| 3331435 | 3331433 | 57192184 | 57192213 | 11 | + | NM_015457 | ZDHHC5   | Zinc finger, DHHC-type containing 5                                             |
| 3333094 | 3333086 | 61160983 | 61161018 | 11 | + | BC010523  | RPLP0P2  | Ribosomal protein, large, P0 pseudogene 2                                       |
| 3333101 | 3333086 | 61161685 | 61161729 | 11 | + | BC010523  | RPLP0P2  | Ribosomal protein, large, P0 pseudogene 2                                       |
| 3333382 | 3333358 | 61669103 | 61669132 | 11 | + | NM_020238 | INCENP   | Inner centromere protein antigens 135/155kDa                                    |
| 3334133 | 3334125 | 63500481 | 63500506 | 11 | + | NM_004074 | COX8A    | Cytochrome c oxidase subunit 8A (ubiquitous)                                    |
| 3334515 | 3334501 | 63845795 | 63845830 | 11 | + | NM_181652 | PRDX5    | Peroxiredoxin 5                                                                 |
| 3334521 | 3334518 | 63864655 | 63864738 | 11 | + | NM_032251 | CCDC88   | Coiled-coil domain containing 88                                                |
| 3335752 | 3335751 | 65469691 | 65469719 | 11 | + | NM_152762 | TSGA10IP | Testis specific, 10 interacting protein                                         |
| 3336045 | 3336043 | 65781851 | 65781889 | 11 | + | NM_022822 | KLC2     | Kinesin light chain 2                                                           |
| 3338428 | 3338424 | 69727449 | 69727474 | 11 | + | NM_003824 | FADD     | Fas (TNFRSF6)-associated via death domain                                       |
| 3339038 | 3339036 | 70916042 | 70916079 | 11 | + | NM_021046 | KRTAP5-9 | Keratin associated protein 5-9                                                  |
| 3339231 | 3339230 | 71317756 | 71317813 | 11 | + | NM_018320 | RNF121   | Ring finger protein 121                                                         |
| 3339980 | 3339971 | 73037753 | 73037780 | 11 | + | NM_021200 | PLEKHB1  | Pleckstrin homology domain containing, family B (evectins) member 1             |
| 3340554 | 3340545 | 74790359 | 74790392 | 11 | + | NM_001005 | RPS3     | Ribosomal protein S3                                                            |
| 3340555 | 3340545 | 74790398 | 74790425 | 11 | + | NM_001005 | RPS3     | Ribosomal protein S3                                                            |
| 3340560 | 3340545 | 74792712 | 74792739 | 11 | + | NM_001005 | RPS3     | Ribosomal protein S3                                                            |
| 3340561 | 3340545 | 74792750 | 74792797 | 11 | + | NM_001005 | RPS3     | Ribosomal protein S3                                                            |
| 3340562 | 3340545 | 74792845 | 74792883 | 11 | + | NM_001005 | RPS3     | Ribosomal protein S3                                                            |
| 3340565 | 3340545 | 74793374 | 74793401 | 11 | + | NM_001005 | RPS3     | Ribosomal protein S3                                                            |
| 3340566 | 3340545 | 74793402 | 74793433 | 11 | + | NM_001005 | RPS3     | Ribosomal protein S3                                                            |
| 3340567 | 3340545 | 74793452 | 74793494 | 11 | + | NM_001005 | RPS3     | Ribosomal protein S3                                                            |
| 3340570 | 3340545 | 74794306 | 74794339 | 11 | + | NM_001005 | RPS3     | Ribosomal protein S3                                                            |
| 3341145 | 3341137 | 76429075 | 76429103 | 11 | + | NM_138706 | B3GNT6   | UDP-GlcNAc:betaGal beta-1,3-N-acetylglucosaminyltransferase 6 (core 3 synthase) |

|         |         |           |           |    |   |              |           |                                                                                           |
|---------|---------|-----------|-----------|----|---|--------------|-----------|-------------------------------------------------------------------------------------------|
| 3343258 | 3343252 | 85691139  | 85691168  | 11 | + | NM_016401    | C11orf73  | Chromosome 11 open reading frame 73                                                       |
| 3345247 | 3345222 | 94172625  | 94172659  | 11 | + | NM_130847    | AMOTL1    | Angiomotin like 1                                                                         |
| 3351371 | 3351359 | 117784964 | 117785016 | 11 | + | NM_006476    | ATP5L     | ATP synthase, H+ transporting, mitochondrial F0 complex, subunit G                        |
| 3351372 | 3351359 | 117785024 | 117785099 | 11 | + | NM_006476    | ATP5L     | ATP synthase, H+ transporting, mitochondrial F0 complex, subunit G                        |
| 3357846 | 3357840 | 309886    | 309977    | 11 | - | XM_084845    | LOC144383 | Similar to Interferon-induced transmembrane protein 3 (Interferon-inducible protein 1-8U) |
| 3357851 | 3357840 | 310565    | 310772    | 11 | - | XM_084845    | LOC144383 | Similar to Interferon-induced transmembrane protein 3 (Interferon-inducible protein 1-8U) |
| 3360007 | 3360006 | 3804857   | 3805161   | 11 | - | NM_001665    | RHOG      | Ras homolog gene family, member G (rho G)                                                 |
| 3362638 | 3362636 | 10249387  | 10250152  | 11 | - | NM_001017998 | GNG10     | Guanine nucleotide binding protein (G protein), gamma 10                                  |
| 3364706 | 3364704 | 16952870  | 16952941  | 11 | - | XM_208185    | LOC284230 | Similar to large subunit ribosomal protein L36a                                           |
| 3364723 | 3364722 | 17052523  | 17052555  | 11 | - | NM_001017    | RPS13     | Ribosomal protein S13                                                                     |
| 3364724 | 3364722 | 17052556  | 17052586  | 11 | - | NM_001017    | RPS13     | Ribosomal protein S13                                                                     |
| 3371638 | 3371637 | 46406734  | 46406778  | 11 | - | NM_001014    | RPS10     | Ribosomal protein S10                                                                     |
| 3371639 | 3371637 | 46406792  | 46406821  | 11 | - | NM_001014    | RPS10     | Ribosomal protein S10                                                                     |
| 3372162 | 3372129 | 47325778  | 47325807  | 11 | - | NM_000256    | MYBPC3    | Myosin binding protein C, cardiac                                                         |
| 3372348 | 3372337 | 47556967  | 47557051  | 11 | - | NM_016506    | MTCH2     | Mitochondrial carrier homolog 2 (C. elegans)                                              |
| 3373700 | 3373675 | 56833018  | 56833049  | 11 | - | NM_033396    | TNKS1BP1  | Tankyrase 1 binding protein 1, 182kDa                                                     |
| 3375649 | 3375648 | 61488360  | 61488439  | 11 | - | NM_002032    | FTH1      | Ferritin, heavy polypeptide 1                                                             |
| 3375650 | 3375648 | 61488520  | 61488606  | 11 | - | NM_002032    | FTH1      | Ferritin, heavy polypeptide 1                                                             |
| 3375651 | 3375648 | 61488662  | 61488691  | 11 | - | NM_002032    | FTH1      | Ferritin, heavy polypeptide 1                                                             |
| 3375652 | 3375648 | 61488806  | 61488836  | 11 | - | NM_002032    | FTH1      | Ferritin, heavy polypeptide 1                                                             |
| 3375654 | 3375648 | 61489104  | 61489144  | 11 | - | NM_002032    | FTH1      | Ferritin, heavy polypeptide 1                                                             |
| 3375656 | 3375648 | 61489426  | 61489464  | 11 | - | NM_002032    | FTH1      | Ferritin, heavy polypeptide 1                                                             |
| 3375657 | 3375648 | 61489504  | 61489563  | 11 | - | NM_002032    | FTH1      | Ferritin, heavy polypeptide 1                                                             |

|         |         |           |           |    |   |           |           |                                                                                                                  |
|---------|---------|-----------|-----------|----|---|-----------|-----------|------------------------------------------------------------------------------------------------------------------|
| 3375663 | 3375648 | 61491360  | 61491431  | 11 | - | NM_002032 | FTH1      | Ferritin, heavy polypeptide 1                                                                                    |
| 3375664 | 3375648 | 61491474  | 61491501  | 11 | - | NM_002032 | FTH1      | Ferritin, heavy polypeptide 1                                                                                    |
| 3375806 | 3375805 | 62083663  | 62083694  | 11 | - | NM_001404 | EEF1G     | Eukaryotic translation elongation factor 1 gamma                                                                 |
| 3375807 | 3375805 | 62083733  | 62083864  | 11 | - | CR613299  | LOC642357 | Similar to Elongation factor 1-gamma (EF-1-gamma) (eEF-1B gamma)                                                 |
| 3375811 | 3375805 | 62084372  | 62084483  | 11 | - | CR613299  | LOC642357 | Similar to Elongation factor 1-gamma (EF-1-gamma) (eEF-1B gamma)                                                 |
| 3375820 | 3375805 | 62095034  | 62095111  | 11 | - | CR613299  | LOC642357 | Similar to Elongation factor 1-gamma (EF-1-gamma) (eEF-1B gamma)                                                 |
| 3377040 | 3377016 | 64282499  | 64282526  | 11 | - | NM_005609 | PYGM      | Phosphorylase, glycogen; muscle (McArdle syndrome, glycogen storage disease type V)                              |
| 3377046 | 3377044 | 64288681  | 64288709  | 11 | - | NM_201998 | SF1       | Splicing factor 1                                                                                                |
| 3377465 | 3377463 | 64644778  | 64644809  | 11 | - | NM_001997 | FAU       | Finkel-Biskis-Reilly murine sarcoma virus (FBR-MuSV) ubiquitously expressed (fox derived); ribosomal protein S30 |
| 3377467 | 3377463 | 64645029  | 64645082  | 11 | - | NM_001997 | FAU       | Finkel-Biskis-Reilly murine sarcoma virus (FBR-MuSV) ubiquitously expressed (fox derived); ribosomal protein S30 |
| 3377743 | 3377737 | 65117390  | 65117429  | 11 | - | NM_005714 | KCNK7     | Potassium channel, subfamily K, member 7                                                                         |
| 3377892 | 3377886 | 65378888  | 65378925  | 11 | - | NM_005507 | CFL1      | Cofilin 1 (non-muscle)                                                                                           |
| 3377893 | 3377886 | 65379006  | 65379205  | 11 | - | NM_005507 | CFL1      | Cofilin 1 (non-muscle)                                                                                           |
| 3378291 | 3378281 | 65962802  | 65962828  | 11 | - | NM_170738 | MRPL11    | Mitochondrial ribosomal protein L11                                                                              |
| 3383148 | 3383138 | 77458567  | 77458598  | 11 | - | AF087899  | NDUFC2    | NADH dehydrogenase (ubiquinone) 1, subcomplex unknown, 2, 14.5kDa                                                |
| 3383149 | 3383138 | 77458599  | 77458664  | 11 | - | NM_004549 | NDUFC2    | NADH dehydrogenase (ubiquinone) 1, subcomplex unknown, 2, 14.5kDa                                                |
| 3383152 | 3383138 | 77461693  | 77461763  | 11 | - | NM_004549 | NDUFC2    | NADH dehydrogenase (ubiquinone) 1, subcomplex unknown, 2, 14.5kDa                                                |
| 3393672 | 3393670 | 117570250 | 117570284 | 11 | - | NM_153206 | AMICA1    | Adhesion molecule, interacts with CXADR antigen 1                                                                |

|         |         |           |           |    |   |              |         |                                                                        |
|---------|---------|-----------|-----------|----|---|--------------|---------|------------------------------------------------------------------------|
| 3394071 | 3394068 | 118391765 | 118391837 | 11 | - | NM_001028    | RPS25   | Ribosomal protein S25                                                  |
| 3395420 | 3395416 | 122433583 | 122433651 | 11 | - | NM_006597    | HSPA8   | Heat shock 70kDa protein 8                                             |
| 3402647 | 3402625 | 6517064   | 6517094   | 12 | + | NM_002046    | GAPDH   | Glyceraldehyde-3-phosphate dehydrogenase                               |
| 3402955 | 3402935 | 6850196   | 6850235   | 12 | + | NM_000365    | TPI1    | Triosephosphate isomerase 1                                            |
| 3403609 | 3403595 | 8182229   | 8182311   | 12 | + | NM_194447    | CLEC4A  | C-type lectin domain family 4, member A                                |
| 3409130 | 3409127 | 27377273  | 27377303  | 12 | + | NM_020183    | ARNTL2  | Aryl hydrocarbon receptor nuclear translocator-like 2                  |
| 3413900 | 3413875 | 48009032  | 48009087  | 12 | + | NM_005480    | TROAP   | Trophinin associated protein (tastin)                                  |
| 3414157 | 3414104 | 48324156  | 48324225  | 12 | + | NM_001031698 | PRPF40B | PRP40 pre-mRNA processing factor 40 homolog B ( <i>S. cerevisiae</i> ) |
| 3414751 | 3414739 | 49611563  | 49611598  | 12 | + | NM_014033    | LETMD1  | LETM1 domain containing 1                                              |
| 3415383 | 3415368 | 50988285  | 50988315  | 12 | + | NM_002284    | KRT86   | Keratin 86                                                             |
| 3415602 | 3415576 | 51632343  | 51632393  | 12 | + | NM_199187    | KRT18   | Keratin 18                                                             |
| 3415936 | 3415915 | 51979449  | 51979482  | 12 | + | NM_145897    | SP1     | Sp1 transcription factor                                               |
| 3416492 | 3416483 | 52962852  | 52962887  | 12 | + | NM_002136    | HNRPA1  | Heterogeneous nuclear ribonucleoprotein A1                             |
| 3417354 | 3417345 | 54797817  | 54797844  | 12 | + | NM_001035267 | RPL41   | Ribosomal protein L41                                                  |
| 3417467 | 3417457 | 54839728  | 54839759  | 12 | + | NM_079423    | MYL6    | Myosin, light chain 6, alkali, smooth muscle and non-muscle            |
| 3417469 | 3417457 | 54840111  | 54840141  | 12 | + | NM_079423    | MYL6    | Myosin, light chain 6, alkali, smooth muscle and non-muscle            |
| 3417471 | 3417457 | 54840322  | 54840371  | 12 | + | NM_079423    | MYL6    | Myosin, light chain 6, alkali, smooth muscle and non-muscle            |
| 3417473 | 3417457 | 54840677  | 54840705  | 12 | + | NM_021019    | MYL6    | Myosin, light chain 6, alkali, smooth muscle and non-muscle            |
| 3417475 | 3417457 | 54841440  | 54841466  | 12 | + | NM_079423    | MYL6    | Myosin, light chain 6, alkali, smooth muscle and non-muscle            |
| 3417476 | 3417457 | 54841487  | 54841567  | 12 | + | NM_079423    | MYL6    | Myosin, light chain 6, alkali, smooth muscle and non-muscle            |
| 3417477 | 3417457 | 54841568  | 54841595  | 12 | + | NM_079423    | MYL6    | Myosin, light chain 6, alkali, smooth muscle and non-muscle            |
| 3419476 | 3419471 | 61646005  | 61646033  | 12 | + | BC009294     | RPL14   | Ribosomal protein L14                                                  |
| 3420155 | 3420151 | 63958771  | 63958803  | 12 | + | NM_198080    | MSRB3   | Methionine sulfoxide reductase B3                                      |

|         |         |           |           |    |   |              |           |                                                                               |
|---------|---------|-----------|-----------|----|---|--------------|-----------|-------------------------------------------------------------------------------|
| 3422328 | 3422326 | 70519832  | 70519857  | 12 | + | NM_022771    | TBC1D15   | TBC1 domain family, member 15                                                 |
| 3427843 | 3427820 | 97519284  | 97519410  | 12 | + | NM_002635    | SLC25A3   | Solute carrier family 25 (mitochondrial carrier; phosphate carrier), member 3 |
| 3429539 | 3429538 | 103183188 | 103183214 | 12 | + | BC066319     | RPL18A    | Ribosomal protein L18a                                                        |
| 3429543 | 3429538 | 103183664 | 103183715 | 12 | + | XM_293412    | LOC347544 | Similar to ribosomal protein L18a                                             |
| 3433810 | 3433796 | 117067716 | 117067760 | 12 | + | NM_002567    | PEBP1     | Phosphatidylethanolamine binding protein 1                                    |
| 3434409 | 3434393 | 119420556 | 119420581 | 12 | + | NM_001037494 | DYNLL1    | Dynein, light chain, LC8-type 1                                               |
| 3435694 | 3435681 | 122033142 | 122033173 | 12 | + | NM_018694    | ARL6IP4   | ADP-ribosylation-like factor 6 interacting protein 4                          |
| 3435776 | 3435752 | 122307866 | 122308011 | 12 | + | NM_152269    | FLJ38663  | Hypothetical protein FLJ38663                                                 |
| 3439259 | 3439256 | 131912554 | 131912586 | 12 | + | BC007945     | RPS11     | Ribosomal protein S11                                                         |
| 3439260 | 3439256 | 131912610 | 131912684 | 12 | + | BC007945     | RPS11     | Ribosomal protein S11                                                         |
| 3439320 | 3439305 | 132135456 | 132135484 | 12 | + | NM_003428    | ZNF84     | Zinc finger protein 84                                                        |
| 3440118 | 3440066 | 1820177   | 1820236   | 12 | - | NM_172364    | CACNA2D4  | Calcium channel, voltage-dependent, alpha 2/delta subunit 4                   |
| 3442247 | 3442205 | 6668811   | 6668837   | 12 | - | NM_001039919 | ZNF384    | Zinc finger protein 384                                                       |
| 3442814 | 3442812 | 7857497   | 7857528   | 12 | - | AL110298     | SLC2A3    | Solute carrier family 2 (facilitated glucose transporter), member 3           |
| 3443956 | 3443952 | 9996796   | 9996935   | 12 | - | NM_207434    | FLJ46363  | FLJ46363 protein                                                              |
| 3444580 | 3444578 | 11351339  | 11351368  | 12 | - | NM_002723    | PRB4      | Proline-rich protein BstNI subfamily 4                                        |
| 3445160 | 3445156 | 13129391  | 13129428  | 12 | - | NM_153823    | GSG1      | Germ cell associated 1                                                        |
| 3445788 | 3445786 | 14986244  | 14986271  | 12 | - | NM_001175    | ARHGDI3   | Rho GDP dissociation inhibitor (GDI) beta                                     |
| 3445790 | 3445786 | 14986372  | 14986580  | 12 | - | NM_001175    | ARHGDI3   | Rho GDP dissociation inhibitor (GDI) beta                                     |
| 3447886 | 3447863 | 25295000  | 25295074  | 12 | - | BC029545     | KRAS      | V-Ki-ras2 Kirsten rat sarcoma viral oncogene homolog                          |
| 3449959 | 3449957 | 31835968  | 31836041  | 12 | - | NM_001013699 | LOC440093 | Similar to H3 histone, family 3B                                              |
| 3449960 | 3449957 | 31836100  | 31836216  | 12 | - | NM_001013699 | LOC440093 | Similar to H3 histone, family 3B                                              |
| 3453739 | 3453732 | 47808008  | 47808033  | 12 | - | NM_006082    | TUBA3     | Tubulin, alpha 3                                                              |
| 3453838 | 3453837 | 47864887  | 47864973  | 12 | - | NM_006009    | TUBA3     | Tubulin, alpha 3                                                              |



|         |         |          |          |    |   |           |       |                                                                                      |
|---------|---------|----------|----------|----|---|-----------|-------|--------------------------------------------------------------------------------------|
| 3453839 | 3453837 | 47865008 | 47865059 | 12 | - | NM_006009 | TUBA3 | Tubulin, alpha 3                                                                     |
| 3455230 | 3455186 | 51200009 | 51200055 | 12 | - | NM_000424 | KRT5  | Keratin 5 (epidermolysis bullosa simplex, Dowling-Meara/Kobner/Weber-Cockayne types) |
| 3455410 | 3455388 | 51110675 | 51110703 | 12 | - | NM_004693 | KRT75 | Keratin 75                                                                           |
| 3455431 | 3455426 | 51127590 | 51127620 | 12 | - | NM_005555 | KRT5  | Keratin 5 (epidermolysis bullosa simplex, Dowling-Meara/Kobner/Weber-Cockayne types) |
| 3455438 | 3455426 | 51129557 | 51129631 | 12 | - | NM_005555 | KRT5  | Keratin 5 (epidermolysis bullosa simplex, Dowling-Meara/Kobner/Weber-Cockayne types) |
| 3455447 | 3455426 | 51131751 | 51131783 | 12 | - | NM_005555 | KRT5  | Keratin 5 (epidermolysis bullosa simplex, Dowling-Meara/Kobner/Weber-Cockayne types) |
| 3455455 | 3455454 | 51149155 | 51149191 | 12 | - | NM_173086 | KRT5  | Keratin 5 (epidermolysis bullosa simplex, Dowling-Meara/Kobner/Weber-Cockayne types) |
| 3455456 | 3455454 | 51149245 | 51149311 | 12 | - | NM_173086 | KRT5  | Keratin 5 (epidermolysis bullosa simplex, Dowling-Meara/Kobner/Weber-Cockayne types) |
| 3455457 | 3455454 | 51149466 | 51149496 | 12 | - | NM_173086 | KRT5  | Keratin 5 (epidermolysis bullosa simplex, Dowling-Meara/Kobner/Weber-Cockayne types) |
| 3455461 | 3455454 | 51151265 | 51151294 | 12 | - | NM_173086 | KRT5  | Keratin 5 (epidermolysis bullosa simplex, Dowling-Meara/Kobner/Weber-Cockayne types) |

|         |         |          |          |    |   |           |      |                                                                                      |
|---------|---------|----------|----------|----|---|-----------|------|--------------------------------------------------------------------------------------|
| 3455464 | 3455454 | 51151748 | 51151776 | 12 | - | NM_173086 | KRT5 | Keratin 5 (epidermolysis bullosa simplex, Dowling-Meara/Kobner/Weber-Cockayne types) |
| 3455479 | 3455478 | 51167249 | 51167765 | 12 | - | NM_005554 | KRT5 | Keratin 5 (epidermolysis bullosa simplex, Dowling-Meara/Kobner/Weber-Cockayne types) |
| 3455480 | 3455478 | 51167771 | 51167835 | 12 | - | NM_005554 | KRT5 | Keratin 5 (epidermolysis bullosa simplex, Dowling-Meara/Kobner/Weber-Cockayne types) |
| 3455481 | 3455478 | 51167848 | 51167873 | 12 | - | NM_005554 | KRT5 | Keratin 5 (epidermolysis bullosa simplex, Dowling-Meara/Kobner/Weber-Cockayne types) |
| 3455482 | 3455478 | 51167903 | 51167997 | 12 | - | NM_005554 | KRT5 | Keratin 5 (epidermolysis bullosa simplex, Dowling-Meara/Kobner/Weber-Cockayne types) |
| 3455484 | 3455478 | 51168120 | 51168150 | 12 | - | NM_173086 | KRT5 | Keratin 5 (epidermolysis bullosa simplex, Dowling-Meara/Kobner/Weber-Cockayne types) |
| 3455492 | 3455478 | 51170657 | 51170731 | 12 | - | NM_173086 | KRT5 | Keratin 5 (epidermolysis bullosa simplex, Dowling-Meara/Kobner/Weber-Cockayne types) |
| 3455498 | 3455478 | 51171591 | 51171683 | 12 | - | NM_173086 | KRT5 | Keratin 5 (epidermolysis bullosa simplex, Dowling-Meara/Kobner/Weber-Cockayne types) |
| 3455861 | 3455842 | 51475735 | 51475811 | 12 | - | NM_057088 | KRT8 | Keratin 8                                                                            |
| 3455866 | 3455865 | 51486685 | 51487031 | 12 | - | NM_002272 | KRT8 | Keratin 8                                                                            |
| 3455867 | 3455865 | 51487161 | 51487187 | 12 | - | NM_002272 | KRT8 | Keratin 8                                                                            |

|         |         |           |           |    |   |              |           |                                                                                                                                       |
|---------|---------|-----------|-----------|----|---|--------------|-----------|---------------------------------------------------------------------------------------------------------------------------------------|
| 3455868 | 3455865 | 51487194  | 51487225  | 12 | - | NM_002272    | KRT8      | Keratin 8                                                                                                                             |
| 3455869 | 3455865 | 51487226  | 51487272  | 12 | - | NM_002272    | KRT8      | Keratin 8                                                                                                                             |
| 3455920 | 3455914 | 51519032  | 51519099  | 12 | - | NM_173352    | KRT8      | Keratin 8                                                                                                                             |
| 3455921 | 3455914 | 51519165  | 51519310  | 12 | - | NM_173352    | KRT8      | Keratin 8                                                                                                                             |
| 3455922 | 3455914 | 51519342  | 51519422  | 12 | - | NM_173352    | KRT8      | Keratin 8                                                                                                                             |
| 3456321 | 3456313 | 52345244  | 52345309  | 12 | - | NM_001002031 | ATP5G2    | ATP synthase, H+ transporting, mitochondrial F0 complex, subunit C2 (subunit 9)                                                       |
| 3457163 | 3457160 | 54405567  | 54405597  | 12 | - | NM_001780    | CD63      | CD63 molecule                                                                                                                         |
| 3457164 | 3457160 | 54405632  | 54405659  | 12 | - | NM_001780    | CD63      | CD63 molecule                                                                                                                         |
| 3457165 | 3457160 | 54405864  | 54405916  | 12 | - | NM_001780    | CD63      | CD63 molecule                                                                                                                         |
| 3457167 | 3457160 | 54406187  | 54406226  | 12 | - | NM_001780    | CD63      | CD63 molecule                                                                                                                         |
| 3457171 | 3457160 | 54406762  | 54406834  | 12 | - | NM_001780    | CD63      | CD63 molecule                                                                                                                         |
| 3458034 | 3458033 | 55318282  | 55318320  | 12 | - | NM_001686    | ATP5B     | ATP synthase, H+ transporting, mitochondrial F1 complex, beta polypeptide                                                             |
| 3458100 | 3458097 | 55392837  | 55392900  | 12 | - | XM_371715    | LOC389240 | Similar to nascent polypeptide-associated complex alpha polypeptide                                                                   |
| 3469352 | 3469319 | 104117406 | 104117432 | 12 | - | NM_018171    | DIP13B    | DIP13 beta                                                                                                                            |
| 3471292 | 3471264 | 109424258 | 109424294 | 12 | - | NM_016226    | VPS29     | Vacuolar protein sorting 29 (yeast)                                                                                                   |
| 3472090 | 3472089 | 111327440 | 111327563 | 12 | - | CR608788     | RPL6      | Ribosomal protein L6                                                                                                                  |
| 3472092 | 3472089 | 111328080 | 111328171 | 12 | - | XM_935384    | LOC646483 | Similar to 60S ribosomal protein L6 (TAX-responsive enhancer element-binding protein 107) (TAXREB107) (Neoplasm-related protein C140) |
| 3472094 | 3472089 | 111328481 | 111328514 | 12 | - | XM_935384    | LOC646483 | Similar to 60S ribosomal protein L6 (TAX-responsive enhancer element-binding protein 107) (TAXREB107) (Neoplasm-related protein C140) |
| 3472096 | 3472089 | 111328939 | 111329069 | 12 | - | NM_001024662 | RPL6      | Ribosomal protein L6                                                                                                                  |
| 3472101 | 3472089 | 111330451 | 111330514 | 12 | - | XM_935384    | LOC646483 | Similar to 60S ribosomal protein L6 (TAX-responsive enhancer element-binding protein 107) (TAXREB107) (Neoplasm-related protein C140) |

|         |         |           |           |    |   |           |           |                                               |
|---------|---------|-----------|-----------|----|---|-----------|-----------|-----------------------------------------------|
| 3473240 | 3473083 | 115199271 | 115199319 | 12 | - | NM_015335 | THRAP2    | Thyroid hormone receptor associated protein 2 |
| 3474345 | 3474344 | 119118925 | 119118958 | 12 | - | NM_001002 | RPLP0     | Ribosomal protein, large, P0                  |
| 3474350 | 3474344 | 119119516 | 119119645 | 12 | - | NM_001002 | RPLP0     | Ribosomal protein, large, P0                  |
| 3474501 | 3474495 | 119368559 | 119368593 | 12 | - | NM_016399 | TRIAP1    | TP53 regulated inhibitor of apoptosis 1       |
| 3475784 | 3475782 | 121751859 | 121752124 | 12 | - | NM_177551 | GPR109A   | G protein-coupled receptor 109A               |
| 3475785 | 3475782 | 121752173 | 121752198 | 12 | - | NM_177551 | GPR109A   | G protein-coupled receptor 109A               |
| 3475799 | 3475794 | 121765273 | 121765429 | 12 | - | NM_006018 | GPR109B   | G protein-coupled receptor 109B               |
| 3475800 | 3475794 | 121765558 | 121765585 | 12 | - | NM_006018 | GPR109B   | G protein-coupled receptor 109B               |
| 3475801 | 3475794 | 121765644 | 121765839 | 12 | - | NM_006018 | GPR109B   | G protein-coupled receptor 109B               |
| 3476494 | 3476457 | 123390655 | 123390699 | 12 | - | NM_006312 | NCOR2     | Nuclear receptor co-repressor 2               |
| 3476742 | 3476741 | 123962213 | 123962246 | 12 | - | NM_021009 | UBC       | Ubiquitin C                                   |
| 3476743 | 3476741 | 123962267 | 123962301 | 12 | - | NM_021009 | UBC       | Ubiquitin C                                   |
| 3476745 | 3476741 | 123962422 | 123962451 | 12 | - | NM_021009 | UBC       | Ubiquitin C                                   |
| 3476746 | 3476741 | 123962452 | 123962549 | 12 | - | NM_021009 | UBC       | Ubiquitin C                                   |
| 3476750 | 3476741 | 123962706 | 123962732 | 12 | - | NM_021009 | UBC       | Ubiquitin C                                   |
| 3476751 | 3476741 | 123962733 | 123962777 | 12 | - | NM_021009 | UBC       | Ubiquitin C                                   |
| 3476754 | 3476741 | 123962908 | 123962988 | 12 | - | NM_021009 | UBC       | Ubiquitin C                                   |
| 3476758 | 3476741 | 123963239 | 123963311 | 12 | - | NM_021009 | UBC       | Ubiquitin C                                   |
| 3476764 | 3476741 | 123963768 | 123963819 | 12 | - | NM_021009 | UBC       | Ubiquitin C                                   |
| 3476771 | 3476741 | 123964181 | 123964211 | 12 | - | NM_021009 | UBC       | Ubiquitin C                                   |
| 3477963 | 3477917 | 127874442 | 127874494 | 12 | - | NM_145648 | SLC15A4   | Solute carrier family 15, member 4            |
| 3480171 | 3480129 | 19523605  | 19523638  | 13 | + | NM_003453 | ZMYM2     | Zinc finger, MYM-type 2                       |
| 3482132 | 3482112 | 24570093  | 24570232  | 13 | + | NM_030979 | PABPC3    | Poly(A) binding protein, cytoplasmic 3        |
| 3482589 | 3482572 | 26029850  | 26029883  | 13 | + | NM_006646 | WASF3     | WAS protein family, member 3                  |
| 3482837 | 3482819 | 26728350  | 26728418  | 13 | + | XM_929340 | LOC653737 | Similar to ribosomal protein L21              |
| 3482839 | 3482819 | 26728601  | 26728657  | 13 | + | XM_929340 | LOC653737 | Similar to ribosomal protein L21              |
| 3483371 | 3483348 | 28150246  | 28150319  | 13 | + | AF077200  | POMP      | Proteasome maturation protein                 |
| 3488256 | 3488253 | 44937173  | 44937217  | 13 | + | NM_031431 | COG3      | Component of oligomeric golgi complex 3       |
| 3489009 | 3488985 | 47733293  | 47733330  | 13 | + | NM_021999 | ITM2B     | Integral membrane protein 2B                  |
| 3489011 | 3488985 | 47733462  | 47733491  | 13 | + | NM_021999 | ITM2B     | Integral membrane protein 2B                  |
| 3489012 | 3488985 | 47733533  | 47734038  | 13 | + | NM_021999 | ITM2B     | Integral membrane protein 2B                  |

|         |         |           |           |    |   |              |          |                                                                  |
|---------|---------|-----------|-----------|----|---|--------------|----------|------------------------------------------------------------------|
| 3497671 | 3497659 | 96884759  | 96884788  | 13 | + | NM_021033    | RAP2A    | RAP2A, member of RAS oncogene family                             |
| 3501443 | 3501415 | 110087477 | 110087510 | 13 | + | NM_018210    | FLJ10769 | Hypothetical protein FLJ10769                                    |
| 3502384 | 3502259 | 112798731 | 112798773 | 13 | + | AB002360     | MCF2L    | MCF.2 cell line derived transforming sequence-like               |
| 3504029 | 3503976 | 19254898  | 19254931  | 13 | - | NM_018282    | PSPC1    | Paraspeckle component 1                                          |
| 3505521 | 3505449 | 23361422  | 23361458  | 13 | - | NM_005932    | MIPEP    | Mitochondrial intermediate peptidase                             |
| 3512544 | 3512527 | 44809071  | 44809107  | 13 | - | BC022436     | TPT1     | Tumor protein, translationally-controlled 1                      |
| 3512545 | 3512527 | 44809206  | 44809251  | 13 | - | BC022436     | TPT1     | Tumor protein, translationally-controlled 1                      |
| 3512546 | 3512527 | 44809327  | 44809360  | 13 | - | NM_003295    | TPT1     | Tumor protein, translationally-controlled 1                      |
| 3512547 | 3512527 | 44809423  | 44809515  | 13 | - | NM_003295    | TPT1     | Tumor protein, translationally-controlled 1                      |
| 3512554 | 3512527 | 44810835  | 44810905  | 13 | - | NM_003295    | TPT1     | Tumor protein, translationally-controlled 1                      |
| 3512556 | 3512527 | 44811660  | 44811730  | 13 | - | NM_003295    | TPT1     | Tumor protein, translationally-controlled 1                      |
| 3512558 | 3512527 | 44812173  | 44812249  | 13 | - | NM_003295    | TPT1     | Tumor protein, translationally-controlled 1                      |
| 3512876 | 3512874 | 45598184  | 45598413  | 13 | - | NM_002298    | LCP1     | Lymphocyte cytosolic protein 1 (L-plastin)                       |
| 3513975 | 3513953 | 49408373  | 49408401  | 13 | - | NM_020456    | C13orf1  | Chromosome 13 open reading frame 1                               |
| 3513976 | 3513953 | 49408404  | 49408434  | 13 | - | NM_020456    | C13orf1  | Chromosome 13 open reading frame 1                               |
| 3518493 | 3518455 | 76499042  | 76499080  | 13 | - | NM_012158    | FBXL3    | F-box and leucine-rich repeat protein 3                          |
| 3522228 | 3522225 | 97902516  | 97902975  | 13 | - | NM_003576    | STK24    | Serine/threonine kinase 24 (STE20 homolog, yeast)                |
| 3527501 | 3527493 | 19993667  | 19993702  | 14 | + | NM_001641    | APEX1    | APEX nuclease (multifunctional DNA repair enzyme) 1              |
| 3529099 | 3529082 | 22864299  | 22864334  | 14 | + | NM_004643    | PABPN1   | Poly(A) binding protein, nuclear 1                               |
| 3529640 | 3529609 | 23677527  | 23677605  | 14 | + | NM_006263    | PSME1    | Proteasome (prosome, macropain) activator subunit 1 (PA28 alpha) |
| 3542240 | 3542207 | 69308063  | 69308099  | 14 | + | NM_001039465 | SFRS5    | Splicing factor, arginine/serine-rich 5                          |

|         |         |          |          |    |   |           |          |                                                                                     |
|---------|---------|----------|----------|----|---|-----------|----------|-------------------------------------------------------------------------------------|
| 3544538 | 3544525 | 74818447 | 74818660 | 14 | + | NM_005252 | FOS      | V-fos FBJ murine osteosarcoma viral oncogene homolog                                |
| 3549767 | 3549757 | 94150558 | 94150585 | 14 | + | NM_001085 | SERPINA3 | Serpin peptidase inhibitor, clade A (alpha-1 antiproteinase, antitrypsin), member 3 |
| 3555738 | 3555736 | 20554817 | 20554882 | 14 | - | NM_201535 | NDRG2    | NDRG family member 2                                                                |
| 3555739 | 3555736 | 20554923 | 20554980 | 14 | - | NM_201535 | NDRG2    | NDRG family member 2                                                                |
| 3557681 | 3557666 | 23116447 | 23116484 | 14 | - | NM_032452 | JPH4     | Junctophilin 4                                                                      |
| 3558759 | 3558745 | 25987373 | 25987409 | 14 | - | NM_006489 | NOVA1    | Neuro-oncological ventral antigen 1                                                 |
| 3561040 | 3561039 | 34940598 | 34940847 | 14 | - | NM_020529 | NFKBIA   | Nuclear factor of kappa light polypeptide gene enhancer in B-cells inhibitor, alpha |
| 3561041 | 3561039 | 34940970 | 34941017 | 14 | - | NM_020529 | NFKBIA   | Nuclear factor of kappa light polypeptide gene enhancer in B-cells inhibitor, alpha |
| 3561043 | 3561039 | 34941351 | 34941484 | 14 | - | NM_020529 | NFKBIA   | Nuclear factor of kappa light polypeptide gene enhancer in B-cells inhibitor, alpha |
| 3561044 | 3561039 | 34941509 | 34941595 | 14 | - | NM_020529 | NFKBIA   | Nuclear factor of kappa light polypeptide gene enhancer in B-cells inhibitor, alpha |
| 3561155 | 3561110 | 35198102 | 35198142 | 14 | - | NM_194301 | GARNL1   | GTPase activating Rap/RanGAP domain-like 1                                          |
| 3562736 | 3562721 | 44673428 | 44673469 | 14 | - | NM_002013 | FKBP3    | FK506 binding protein 3, 25kDa                                                      |
| 3563321 | 3563317 | 49120095 | 49120133 | 14 | - | NM_001032 | RPS29    | Ribosomal protein S29                                                               |
| 3563328 | 3563317 | 49122422 | 49122454 | 14 | - | NM_001032 | RPS29    | Ribosomal protein S29                                                               |
| 3563329 | 3563317 | 49122480 | 49122517 | 14 | - | NM_001032 | RPS29    | Ribosomal protein S29                                                               |
| 3563331 | 3563317 | 49122757 | 49122799 | 14 | - | NM_001032 | RPS29    | Ribosomal protein S29                                                               |
| 3563359 | 3563357 | 49155253 | 49155303 | 14 | - | NM_001001 | RPL36AL  | Ribosomal protein L36a-like                                                         |
| 3567412 | 3567391 | 60260264 | 60260314 | 14 | - | NM_017420 | SIX4     | Sine oculis homeobox homolog 4 (Drosophila)                                         |
| 3569756 | 3569754 | 68324226 | 68324508 | 14 | - | NM_004926 | ZFP36L1  | Zinc finger protein 36, C3H type-like 1                                             |
| 3569758 | 3569754 | 68324985 | 68325263 | 14 | - | NM_004926 | ZFP36L1  | Zinc finger protein 36, C3H type-like 1                                             |
| 3570294 | 3570293 | 69421776 | 69421806 | 14 | - | NM_000972 | RPL7A    | Ribosomal protein L7a                                                               |
| 3570295 | 3570293 | 69421840 | 69421883 | 14 | - | NM_000972 | RPL7A    | Ribosomal protein L7a                                                               |

|         |         |           |           |    |   |              |          |                                                                                     |
|---------|---------|-----------|-----------|----|---|--------------|----------|-------------------------------------------------------------------------------------|
| 3570643 | 3570599 | 70345390  | 70345454  | 14 | - | NM_033141    | MAP3K9   | Mitogen-activated protein kinase kinase kinase 9                                    |
| 3571752 | 3571727 | 73620824  | 73620850  | 14 | - | NM_005589    | ALDH6A1  | Aldehyde dehydrogenase 6 family, member A1                                          |
| 3573048 | 3573029 | 76913060  | 76913085  | 14 | - | NM_213601    | TMED8    | Transmembrane emp24 protein transport domain containing 8                           |
| 3576939 | 3576937 | 91652259  | 91652287  | 14 | - | BC104672     | NDUFB1   | NADH dehydrogenase (ubiquinone) 1 beta subcomplex, 1, 7kDa                          |
| 3577630 | 3577612 | 93914683  | 93914729  | 14 | - | NM_001002235 | SERPINA1 | Serpin peptidase inhibitor, clade A (alpha-1 antiproteinase, antitrypsin), member 1 |
| 3579274 | 3579269 | 99048078  | 99048107  | 14 | - | AK026211     | C14orf65 | Chromosome 14 open reading frame 65                                                 |
| 3580954 | 3580947 | 103448662 | 103448740 | 14 | - | NM_004894    | C14orf2  | Chromosome 14 open reading frame 2                                                  |
| 3580955 | 3580947 | 103448756 | 103448784 | 14 | - | NM_004894    | C14orf2  | Chromosome 14 open reading frame 2                                                  |
| 3585274 | 3585272 | 24799455  | 24799481  | 15 | + | NM_033223    | GABRG3   | Gamma-aminobutyric acid (GABA) A receptor, gamma 3                                  |
| 3590178 | 3590164 | 38933392  | 38933418  | 15 | + | NM_181642    | SPINT1   | Serine peptidase inhibitor, Kunitz type 1                                           |
| 3592043 | 3592023 | 42797103  | 42797167  | 15 | + | NM_004048    | B2M      | Beta-2-microglobulin                                                                |
| 3592045 | 3592023 | 42797301  | 42797329  | 15 | + | NM_004048    | B2M      | Beta-2-microglobulin                                                                |
| 3592046 | 3592023 | 42797368  | 42797432  | 15 | + | NM_004048    | B2M      | Beta-2-microglobulin                                                                |
| 3592047 | 3592023 | 42797441  | 42797598  | 15 | + | NM_004048    | B2M      | Beta-2-microglobulin                                                                |
| 3592406 | 3592401 | 43510495  | 43510559  | 15 | + | NM_032413    | C15orf48 | Chromosome 15 open reading frame 48                                                 |
| 3592407 | 3592401 | 43511588  | 43511622  | 15 | + | NM_032413    | C15orf48 | Chromosome 15 open reading frame 48                                                 |
| 3592409 | 3592401 | 43512557  | 43512646  | 15 | + | NM_032413    | C15orf48 | Chromosome 15 open reading frame 48                                                 |
| 3594049 | 3594031 | 49862210  | 49862310  | 15 | + | NM_014548    | TMOD2    | Tropomodulin 2 (neuronal)                                                           |
| 3599440 | 3599432 | 66357766  | 66357794  | 15 | + | NM_015322    | FEM1B    | Fem-1 homolog b (C. elegans)                                                        |
| 3601356 | 3601348 | 72006871  | 72006902  | 15 | + | NM_005576    | LOXL1    | Lysyl oxidase-like 1                                                                |
| 3609189 | 3609138 | 91273264  | 91273325  | 15 | + | NM_001271    | CHD2     | Chromodomain helicase DNA binding protein 2                                         |
| 3620859 | 3620799 | 41000227  | 41000256  | 15 | - | BC041876     | TTBK2    | Tau tubulin kinase 2                                                                |

|         |         |          |          |    |   |              |           |                                                                                  |
|---------|---------|----------|----------|----|---|--------------|-----------|----------------------------------------------------------------------------------|
| 3627284 | 3627248 | 58426837 | 58426865 | 15 | - | NM_001002857 | ANXA2     | Annexin A2                                                                       |
| 3627285 | 3627248 | 58426866 | 58426896 | 15 | - | NM_001002857 | ANXA2     | Annexin A2                                                                       |
| 3627286 | 3627248 | 58426942 | 58427019 | 15 | - | NM_001002857 | ANXA2     | Annexin A2                                                                       |
| 3627287 | 3627248 | 58427027 | 58427061 | 15 | - | NM_001002857 | ANXA2     | Annexin A2                                                                       |
| 3629207 | 3629206 | 62766857 | 62766890 | 15 | - | NM_002537    | OAZ2      | Ornithine decarboxylase antizyme 2                                               |
| 3630184 | 3630180 | 64578800 | 64578859 | 15 | - | NM_000968    | RPL4      | Ribosomal protein L4                                                             |
| 3630185 | 3630180 | 64578970 | 64579042 | 15 | - | NM_000968    | RPL4      | Ribosomal protein L4                                                             |
| 3630916 | 3630912 | 66859335 | 66859360 | 15 | - | NM_006305    | ANP32A    | Acidic (leucine-rich) nuclear phosphoprotein 32 family, member A                 |
| 3633223 | 3633221 | 72999754 | 72999813 | 15 | - | NM_004255    | COX5A     | Cytochrome c oxidase subunit Va                                                  |
| 3633870 | 3633794 | 74390746 | 74390784 | 15 | - | NM_000126    | ETFA      | Electron-transfer-flavoprotein, alpha polypeptide (glutaric aciduria II)         |
| 3635161 | 3635159 | 77978336 | 77978500 | 15 | - | AF249277     | MTHFS     | 5,10-methenyltetrahydrofolate synthetase (5-formyltetrahydrofolate cyclo-ligase) |
| 3635199 | 3635198 | 78040379 | 78040457 | 15 | - | BC016281     | BCL2A1    | BCL2-related protein A1                                                          |
| 3635200 | 3635198 | 78040465 | 78040549 | 15 | - | BC016281     | BCL2A1    | BCL2-related protein A1                                                          |
| 3635867 | 3635866 | 80451512 | 80451540 | 15 | - | NM_000661    | RPL9      | Ribosomal protein L9                                                             |
| 3635868 | 3635866 | 80451569 | 80451634 | 15 | - | NM_000661    | RPL9      | Ribosomal protein L9                                                             |
| 3635869 | 3635866 | 80451683 | 80451754 | 15 | - | NM_000661    | RPL9      | Ribosomal protein L9                                                             |
| 3636093 | 3636092 | 80838053 | 80838081 | 15 | - | NM_000661    | RPL9      | Ribosomal protein L9                                                             |
| 3637008 | 3637006 | 83014044 | 83014224 | 15 | - | NM_014300    | SEC11A    | SEC11 homolog A ( <i>S. cerevisiae</i> )                                         |
| 3638432 | 3638411 | 87815685 | 87815924 | 15 | - | NM_016321    | RHCG      | Rh family, C glycoprotein                                                        |
| 3638442 | 3638411 | 87821384 | 87821414 | 15 | - | NM_016321    | RHCG      | Rh family, C glycoprotein                                                        |
| 3639446 | 3639406 | 90999700 | 90999725 | 15 | - | NM_207446    | LOC400451 | Hypothetical gene supported by AK075564; BC060873                                |
| 3642609 | 3642604 | 68232    | 68284    | 16 | + | NM_001015052 | MPG       | N-methylpurine-DNA glycosylase                                                   |
| 3643248 | 3643229 | 660933   | 660996   | 16 | + | NM_138769    | RHOT2     | Ras homolog gene family, member T2                                               |
| 3644923 | 3644887 | 2509812  | 2510095  | 16 | + | NM_001694    | ATP6V0C   | ATPase, H <sup>+</sup> transporting, lysosomal 16kDa, V0 subunit c               |
| 3645323 | 3645322 | 2788521  | 2788550  | 16 | + | XR_017806    |           | PREDICTED: Homo sapiens testis serine protease 1 (TESSP1), misc RNA.             |
| 3645367 | 3645359 | 2821909  | 2822156  | 16 | + | NM_145252    | LOC124220 | Similar to common salivary protein 1                                             |



|         |         |          |          |    |   |              |           |                                                             |
|---------|---------|----------|----------|----|---|--------------|-----------|-------------------------------------------------------------|
| 3645368 | 3645359 | 2822216  | 2822257  | 16 | + | NM_145252    | LOC124220 | Similar to common salivary protein 1                        |
| 3645480 | 3645477 | 2959704  | 2959744  | 16 | + | NM_152341    | KREMEN2   | Kringle containing transmembrane protein 2                  |
| 3655631 | 3655628 | 29709621 | 29709651 | 16 | + | NM_007317    | KIF22     | Kinesin family member 22                                    |
| 3655956 | 3655920 | 29989160 | 29989185 | 16 | + | NM_184041    | ALDOA     | Aldolase A, fructose-bisphosphate                           |
| 3656856 | 3656855 | 31036504 | 31036570 | 16 | + | NM_032188    | MYST1     | MYST histone acetyltransferase 1                            |
| 3656944 | 3656904 | 31110221 | 31110250 | 16 | + | NM_001010850 | FUS       | Fusion (involved in t(12;16) in malignant liposarcoma)      |
| 3656945 | 3656904 | 31110294 | 31110389 | 16 | + | NM_001010850 | FUS       | Fusion (involved in t(12;16) in malignant liposarcoma)      |
| 3659998 | 3659966 | 48886053 | 48886091 | 16 | + | NM_001114    | ADCY7     | Adenylate cyclase 7                                         |
| 3663044 | 3663033 | 56576908 | 56576935 | 16 | + | NM_199046    | TEPP      | Testis/prostate/placenta-expressed protein, isoform 2       |
| 3664698 | 3664664 | 64994065 | 64994095 | 16 | + | NM_001795    | CDH5      | Cadherin 5, type 2, VE-cadherin (vascular epithelium)       |
| 3665163 | 3665161 | 65701454 | 65701488 | 16 | + | NM_025187    | C16orf70  | Chromosome 16 open reading frame 70                         |
| 3665884 | 3665882 | 66464593 | 66464645 | 16 | + | NM_014329    | EDC4      | Enhancer of mRNA decapping 4                                |
| 3669073 | 3669059 | 74168779 | 74169215 | 16 | + | NM_007285    | GABARAPL2 | GABA(A) receptor-associated protein-like 2                  |
| 3671768 | 3671727 | 83037498 | 83037535 | 16 | + | NM_014861    | ATP2C2    | ATPase, Ca <sup>++</sup> transporting, type 2C, member 2    |
| 3672405 | 3672368 | 84252821 | 84252867 | 16 | + | NM_014615    | KIAA0182  | KIAA0182                                                    |
| 3674162 | 3674146 | 88156915 | 88156946 | 16 | + | NM_033251    | RPL13     | Ribosomal protein L13                                       |
| 3674193 | 3674166 | 88594557 | 88594597 | 16 | + | AK091727     | AFG3L1    | AFG3 ATPase family gene 3-like 1 (S. cerevisiae)            |
| 3674847 | 3674840 | 43587    | 43619    | 16 | - | NM_016310    | POLR3K    | Polymerase (RNA) III (DNA directed) polypeptide K, 12.3 kDa |
| 3676302 | 3676300 | 1952112  | 1952141  | 16 | - | AB065088     | RPS2      | Ribosomal protein S2                                        |
| 3676303 | 3676300 | 1952163  | 1952193  | 16 | - | AB065088     | RPS2      | Ribosomal protein S2                                        |
| 3676304 | 3676300 | 1952232  | 1952267  | 16 | - | AB065088     | RPS2      | Ribosomal protein S2                                        |
| 3676308 | 3676300 | 1952500  | 1952529  | 16 | - | AB065089     | RPS2      | Ribosomal protein S2                                        |
| 3676309 | 3676300 | 1952567  | 1952598  | 16 | - | AB065089     | RPS2      | Ribosomal protein S2                                        |

|         |         |          |          |    |   |              |          |                                                                                        |
|---------|---------|----------|----------|----|---|--------------|----------|----------------------------------------------------------------------------------------|
| 3678390 | 3678369 | 4792529  | 4792561  | 16 | - | NM_024589    | ROGDI    | Rogdi homolog (Drosophila)                                                             |
| 3678465 | 3678462 | 4872599  | 4873299  | 16 | - | NM_002705    | PPL      | Periplakin                                                                             |
| 3683022 | 3683018 | 18701863 | 18701896 | 16 | - | NM_001030009 | RPS15A   | Ribosomal protein S15a                                                                 |
| 3683028 | 3683018 | 18703596 | 18703626 | 16 | - | NM_001030009 | RPS15A   | Ribosomal protein S15a                                                                 |
| 3684491 | 3684486 | 21561909 | 21561972 | 16 | - | NM_005849    | IGSF6    | Immunoglobulin superfamily, member 6                                                   |
| 3684493 | 3684486 | 21563112 | 21563202 | 16 | - | NM_005849    | IGSF6    | Immunoglobulin superfamily, member 6                                                   |
| 3687262 | 3687260 | 29777198 | 29777227 | 16 | - | AK131227     | CDIPT    | CDP-diacylglycerol--inositol 3-phosphatidyltransferase (phosphatidylinositol synthase) |
| 3687453 | 3687452 | 30011158 | 30011249 | 16 | - | CR604822     | YPEL3    | Yippee-like 3 (Drosophila)                                                             |
| 3687454 | 3687452 | 30011302 | 30011336 | 16 | - | CR604822     | YPEL3    | Yippee-like 3 (Drosophila)                                                             |
| 3687801 | 3687789 | 30348767 | 30348800 | 16 | - | NM_024096    | XTP3TPA  | XTP3-transactivated protein A                                                          |
| 3706528 | 3706439 | 2855413  | 2855443  | 17 | + | NM_015085    | GARNL4   | GTPase activating Rap/RanGAP domain-like 4                                             |
| 3708196 | 3708186 | 6858369  | 6858559  | 17 | + | NM_001004333 | MGC71993 | Similar to DNA segment, Chr 11, Brigham & Womens Genetics 0434 expressed               |
| 3708309 | 3708306 | 7064037  | 7064089  | 17 | + | NM_000018    | ACADVL   | Acyl-Coenzyme A dehydrogenase, very long chain                                         |
| 3709263 | 3709244 | 7737431  | 7737458  | 17 | + | NM_001005273 | CHD3     | Chromodomain helicase DNA binding protein 3                                            |
| 3709562 | 3709540 | 8108255  | 8108320  | 17 | + | NM_012393    | PFAS     | Phosphoribosylformylglycinamide synthase (FGAR amidotransferase)                       |
| 3712046 | 3712041 | 16225176 | 16225209 | 17 | + | NM_018955    | UBB      | Ubiquitin B                                                                            |
| 3712050 | 3712041 | 16225966 | 16225994 | 17 | + | BC031027     | UBB      | Ubiquitin B                                                                            |
| 3712051 | 3712041 | 16226006 | 16226061 | 17 | + | BC031027     | UBB      | Ubiquitin B                                                                            |
| 3712052 | 3712041 | 16226103 | 16226450 | 17 | + | BC031027     | UBB      | Ubiquitin B                                                                            |
| 3712054 | 3712041 | 16226637 | 16226664 | 17 | + | BC031027     | UBB      | Ubiquitin B                                                                            |
| 3712055 | 3712041 | 16226727 | 16226754 | 17 | + | BC031027     | UBB      | Ubiquitin B                                                                            |
| 3715612 | 3715601 | 23818987 | 23819405 | 17 | + | XR_015607    |          | PREDICTED: Homo sapiens similar to 40S ribosomal protein S7 (S8) (LOC730887), mRNA.    |
| 3715797 | 3715779 | 24074755 | 24074784 | 17 | + | NM_000984    | RPL23A   | Ribosomal protein L23a                                                                 |

|         |         |          |          |    |   |           |         |                                                                                            |
|---------|---------|----------|----------|----|---|-----------|---------|--------------------------------------------------------------------------------------------|
| 3715948 | 3715935 | 24394341 | 24394368 | 17 | + | NM_016518 | PIPOX   | Pipecolic acid oxidase                                                                     |
| 3718829 | 3718791 | 31195790 | 31195856 | 17 | + | NM_003487 | TAF15   | TAF15 RNA polymerase II, TATA box binding protein (TBP)-associated factor, 68kDa           |
| 3718986 | 3718977 | 31564095 | 31564337 | 17 | + | NM_002984 | CCL4    | Chemokine (C-C motif) ligand 4                                                             |
| 3719031 | 3719020 | 31665661 | 31665903 | 17 | + | NM_207007 | CCL4L2  | Chemokine (C-C motif) ligand 4-like 2                                                      |
| 3720125 | 3720115 | 34612773 | 34612888 | 17 | + | NM_000981 | RPL19   | Ribosomal protein L19                                                                      |
| 3720128 | 3720115 | 34613882 | 34613966 | 17 | + | NM_000981 | RPL19   | Ribosomal protein L19                                                                      |
| 3720130 | 3720115 | 34614312 | 34614359 | 17 | + | NM_000981 | RPL19   | Ribosomal protein L19                                                                      |
| 3720131 | 3720115 | 34614360 | 34614388 | 17 | + | NM_000981 | RPL19   | Ribosomal protein L19                                                                      |
| 3720132 | 3720115 | 34614389 | 34614417 | 17 | + | NM_000981 | RPL19   | Ribosomal protein L19                                                                      |
| 3720133 | 3720115 | 34614455 | 34614489 | 17 | + | NM_000981 | RPL19   | Ribosomal protein L19                                                                      |
| 3720639 | 3720636 | 35390870 | 35390905 | 17 | + | NM_002809 | PSMD3   | Proteasome (prosome, macropain) 26S subunit, non-ATPase, 3                                 |
| 3721407 | 3721400 | 37098817 | 37098847 | 17 | + | NM_005801 | EIF1    | Eukaryotic translation initiation factor 1                                                 |
| 3721410 | 3721400 | 37099568 | 37099593 | 17 | + | NM_005801 | EIF1    | Eukaryotic translation initiation factor 1                                                 |
| 3721412 | 3721400 | 37099872 | 37099954 | 17 | + | NM_005801 | EIF1    | Eukaryotic translation initiation factor 1                                                 |
| 3721414 | 3721400 | 37100560 | 37100599 | 17 | + | NM_005801 | EIF1    | Eukaryotic translation initiation factor 1                                                 |
| 3721415 | 3721400 | 37100643 | 37100727 | 17 | + | NM_005801 | EIF1    | Eukaryotic translation initiation factor 1                                                 |
| 3722157 | 3722152 | 38238952 | 38238979 | 17 | + | NM_005789 | PSME3   | Proteasome (prosome, macropain) activator subunit 3 (PA28 gamma; Ki)                       |
| 3722318 | 3722304 | 38408415 | 38408441 | 17 | + | NM_000988 | RPL27   | Ribosomal protein L27                                                                      |
| 3726974 | 3726960 | 46603907 | 46603946 | 17 | + | NM_002512 | NME1    | Non-metastatic cells 1, protein (NM23A) expressed in                                       |
| 3728956 | 3728889 | 55271922 | 55272040 | 17 | + | NM_030938 | TMEM49  | Transmembrane protein 49                                                                   |
| 3730680 | 3730601 | 58941185 | 58941275 | 17 | + | NM_152831 | ACE     | Angiotensin I converting enzyme (peptidyl-dipeptidase A) 1                                 |
| 3732889 | 3732885 | 64020285 | 64020314 | 17 | + | NM_212472 | PRKAR1A | Protein kinase, cAMP-dependent, regulatory, type I, alpha (tissue specific extinguisher 1) |

|         |         |          |          |    |   |           |           |                                                                            |
|---------|---------|----------|----------|----|---|-----------|-----------|----------------------------------------------------------------------------|
| 3734226 | 3734187 | 69711892 | 69711924 | 17 | + | NM_000999 | RPL38     | Ribosomal protein L38                                                      |
| 3734232 | 3734187 | 69716950 | 69716975 | 17 | + | NM_000999 | RPL38     | Ribosomal protein L38                                                      |
| 3734234 | 3734187 | 69717566 | 69717596 | 17 | + | NM_000999 | RPL38     | Ribosomal protein L38                                                      |
| 3735455 | 3735447 | 71778852 | 71778884 | 17 | + | NM_182565 | FAM100B   | Family with sequence similarity 100, member B                              |
| 3735456 | 3735447 | 71778895 | 71778943 | 17 | + | NM_182565 | FAM100B   | Family with sequence similarity 100, member B                              |
| 3735817 | 3735752 | 72719646 | 72719786 | 17 | + | NM_003003 | SEC14L1   | SEC14-like 1 ( <i>S. cerevisiae</i> )                                      |
| 3738496 | 3738490 | 77603430 | 77603457 | 17 | + | NM_212492 | GPS1      | G protein pathway suppressor 1                                             |
| 3747769 | 3747768 | 17227466 | 17227565 | 17 | - | XM_371023 | LOC388344 | Similar to ribosomal protein L13                                           |
| 3748826 | 3748825 | 19289890 | 19289920 | 17 | - | NM_002952 | RPS2      | Ribosomal protein S2                                                       |
| 3748828 | 3748825 | 19290048 | 19290078 | 17 | - | NM_002952 | RPS2      | Ribosomal protein S2                                                       |
| 3748829 | 3748825 | 19290084 | 19290114 | 17 | - | NM_002952 | RPS2      | Ribosomal protein S2                                                       |
| 3750381 | 3750369 | 23111284 | 23111313 | 17 | - | NM_153292 | NOS2A     | Nitric oxide synthase 2A (inducible, hepatocytes)                          |
| 3751125 | 3751121 | 24230524 | 24230575 | 17 | - | NM_004475 | FLOT2     | Flotillin 2                                                                |
| 3754010 | 3754009 | 31439723 | 31439773 | 17 | - | NM_002983 | CCL3      | Chemokine (C-C motif) ligand 3                                             |
| 3755432 | 3755429 | 34259920 | 34259950 | 17 | - | NM_000978 | RPL23     | Ribosomal protein L23                                                      |
| 3755434 | 3755429 | 34260141 | 34260166 | 17 | - | NM_000978 | RPL23     | Ribosomal protein L23                                                      |
| 3756528 | 3756523 | 36228713 | 36228740 | 17 | - | NM_000421 | KRT10     | Keratin 10 (epidermolytic hyperkeratosis; keratosis palmaris et plantaris) |
| 3756538 | 3756523 | 36231923 | 36232005 | 17 | - | NM_000421 | KRT10     | Keratin 10 (epidermolytic hyperkeratosis; keratosis palmaris et plantaris) |
| 3757052 | 3757050 | 36910827 | 36910879 | 17 | - | NM_002274 | KRT17     | Keratin 17                                                                 |
| 3757053 | 3757050 | 36910993 | 36911033 | 17 | - | NM_002274 | KRT17     | Keratin 17                                                                 |
| 3757054 | 3757050 | 36911034 | 36911116 | 17 | - | NM_002274 | KRT17     | Keratin 17                                                                 |
| 3757056 | 3757050 | 36911497 | 36911522 | 17 | - | NM_153490 | KRT17     | Keratin 17                                                                 |
| 3757060 | 3757050 | 36912238 | 36912281 | 17 | - | NM_002274 | KRT17     | Keratin 17                                                                 |
| 3757061 | 3757050 | 36912315 | 36912344 | 17 | - | NM_002274 | KRT17     | Keratin 17                                                                 |
| 3757062 | 3757050 | 36912345 | 36912372 | 17 | - | NM_002274 | KRT17     | Keratin 17                                                                 |
| 3757063 | 3757050 | 36912493 | 36912577 | 17 | - | NM_002274 | KRT17     | Keratin 17                                                                 |
| 3757065 | 3757050 | 36912715 | 36912871 | 17 | - | NM_002274 | KRT17     | Keratin 17                                                                 |

|         |         |          |          |    |   |              |           |                                                                    |
|---------|---------|----------|----------|----|---|--------------|-----------|--------------------------------------------------------------------|
| 3757067 | 3757050 | 36913077 | 36913154 | 17 | - | NM_002274    | KRT17     | Keratin 17                                                         |
| 3757068 | 3757050 | 36913194 | 36913221 | 17 | - | NM_002274    | KRT17     | Keratin 17                                                         |
| 3757070 | 3757050 | 36913463 | 36913503 | 17 | - | NM_002274    | KRT17     | Keratin 17                                                         |
| 3757072 | 3757050 | 36914838 | 36914926 | 17 | - | NM_002274    | KRT17     | Keratin 17                                                         |
| 3757073 | 3757050 | 36915034 | 36915065 | 17 | - | NM_002274    | KRT17     | Keratin 17                                                         |
| 3757074 | 3757050 | 36915108 | 36915141 | 17 | - | NM_002274    | KRT17     | Keratin 17                                                         |
| 3757075 | 3757050 | 36915169 | 36915222 | 17 | - | NM_002274    | KRT17     | Keratin 17                                                         |
| 3757109 | 3757108 | 36933466 | 36933501 | 17 | - | NM_002276    | KRT17     | Keratin 17                                                         |
| 3757141 | 3757138 | 36977075 | 36977145 | 17 | - | NM_000226    | KRT17     | Keratin 17                                                         |
| 3757172 | 3757154 | 36996280 | 36996361 | 17 | - | NM_000526    | KRT17     | Keratin 17                                                         |
| 3757429 | 3757423 | 37275093 | 37275149 | 17 | - | NM_018143    | KLHL11    | Kelch-like 11 (Drosophila)                                         |
| 3760925 | 3760894 | 43248716 | 43248744 | 17 | - | AB208886     | OSBPL7    | Oxysterol binding protein-like 7                                   |
| 3761446 | 3761441 | 44047067 | 44047095 | 17 | - | NM_024016    | HOXB8     | Homeobox B8                                                        |
| 3761947 | 3761905 | 45110313 | 45110340 | 17 | - | NM_001007229 | SPOP      | Speckle-type POZ protein                                           |
| 3762371 | 3762355 | 45829768 | 45829843 | 17 | - | NM_018509    | LRRC59    | Leucine rich repeat containing 59                                  |
| 3764388 | 3764384 | 53778303 | 53778335 | 17 | - | NM_003168    | SUPT4H1   | Suppressor of Ty 4 homolog 1 (S. cerevisiae)                       |
| 3765771 | 3765689 | 57497377 | 57497411 | 17 | - | NM_005121    | THRAP1    | Thyroid hormone receptor associated protein 1                      |
| 3768137 | 3768103 | 62793098 | 62793127 | 17 | - | NM_002816    | PSMD12    | Proteasome (prosome, macropain) 26S subunit, non-ATPase, 12        |
| 3770565 | 3770563 | 70546623 | 70546720 | 17 | - | NM_006356    | ATP5H     | ATP synthase, H+ transporting, mitochondrial F0 complex, subunit d |
| 3770566 | 3770563 | 70546899 | 70546960 | 17 | - | NM_006356    | ATP5H     | ATP synthase, H+ transporting, mitochondrial F0 complex, subunit d |
| 3770948 | 3770944 | 71285365 | 71285482 | 17 | - | NM_005324    | H3F3B     | H3 histone, family 3B (H3.3B)                                      |
| 3770950 | 3770944 | 71285885 | 71285924 | 17 | - | NM_001013699 | LOC440093 | Similar to H3 histone, family 3B                                   |
| 3770951 | 3770944 | 71286035 | 71286061 | 17 | - | NM_001013699 | LOC440093 | Similar to H3 histone, family 3B                                   |
| 3770952 | 3770944 | 71286279 | 71286352 | 17 | - | NM_001013699 | LOC440093 | Similar to H3 histone, family 3B                                   |
| 3770954 | 3770944 | 71286497 | 71286549 | 17 | - | NM_001013699 | LOC440093 | Similar to H3 histone, family 3B                                   |

|         |         |          |          |    |   |              |           |                                                                                             |
|---------|---------|----------|----------|----|---|--------------|-----------|---------------------------------------------------------------------------------------------|
| 3770955 | 3770944 | 71286595 | 71286632 | 17 | - | NM_001013699 | LOC440093 | Similar to H3 histone, family 3B                                                            |
| 3771039 | 3771037 | 71353438 | 71353562 | 17 | - | NM_012478    | WBP2      | WW domain binding protein 2                                                                 |
| 3773153 | 3773149 | 75383669 | 75383698 | 17 | - | NM_020649    | CBX8      | Chromobox homolog 8 (Pc class homolog, Drosophila)                                          |
| 3773935 | 3773932 | 77091866 | 77091896 | 17 | - | NM_001614    | ACTG1     | Actin, gamma 1                                                                              |
| 3773940 | 3773932 | 77092596 | 77092721 | 17 | - | NM_001614    | ACTG1     | Actin, gamma 1                                                                              |
| 3773949 | 3773932 | 77093737 | 77093763 | 17 | - | NM_001614    | ACTG1     | Actin, gamma 1                                                                              |
| 3774243 | 3774241 | 77394346 | 77394374 | 17 | - | NM_000918    | P4HB      | Procollagen-proline, 2-oxoglutarate 4-dioxygenase (proline 4-hydroxylase), beta polypeptide |
| 3774853 | 3774823 | 77806695 | 77806723 | 17 | - | NM_139062    | CSNK1D    | Casein kinase 1, delta                                                                      |
| 3775233 | 3775211 | 78215665 | 78215691 | 17 | - | NM_006822    | RAB40B    | RAB40B, member RAS oncogene family                                                          |
| 3776460 | 3776449 | 3267890  | 3267933  | 18 | + | NM_033546    | MRLC2     | Myosin regulatory light chain MRLC2                                                         |
| 3776462 | 3776449 | 3268079  | 3268106  | 18 | + | NM_033546    | MRLC2     | Myosin regulatory light chain MRLC2                                                         |
| 3778234 | 3778207 | 9114889  | 9114969  | 18 | + | NM_021074    | NDUFV2    | NADH dehydrogenase (ubiquinone) flavoprotein 2, 24kDa                                       |
| 3784675 | 3784670 | 31806768 | 31806801 | 18 | + | BC025950     | C18orf21  | Chromosome 18 open reading frame 21                                                         |
| 3788145 | 3788097 | 46509752 | 46509777 | 18 | + | NM_002747    | MAPK4     | Mitogen-activated protein kinase 4                                                          |
| 3794352 | 3794341 | 72337495 | 72337535 | 18 | + | AK126293     |           | Homo sapiens cDNA FLJ44313 fis, clone TRACH2025911.                                         |
| 3795728 | 3795680 | 257974   | 258019   | 18 | - | NM_005131    | THOC1     | THO complex 1                                                                               |
| 3797452 | 3797450 | 6452163  | 6452201  | 18 | - | NM_000970    | RPL6      | Ribosomal protein L6                                                                        |
| 3797453 | 3797450 | 6452212  | 6452250  | 18 | - | NM_000970    | RPL6      | Ribosomal protein L6                                                                        |
| 3797456 | 3797450 | 6452484  | 6452514  | 18 | - | NM_000970    | RPL6      | Ribosomal protein L6                                                                        |
| 3797458 | 3797450 | 6452609  | 6452651  | 18 | - | NM_000970    | RPL6      | Ribosomal protein L6                                                                        |
| 3800866 | 3800834 | 17517879 | 17517905 | 18 | - | NM_138340    | ABHD3     | Abhydrolase domain containing 3                                                             |
| 3806255 | 3806253 | 41918141 | 41918237 | 18 | - | NM_001001937 | ATP5A1    | ATP synthase, H+ transporting, mitochondrial F1 complex, alpha subunit 1, cardiac muscle    |
| 3806256 | 3806253 | 41918255 | 41918312 | 18 | - | NM_001001937 | ATP5A1    | ATP synthase, H+ transporting, mitochondrial F1 complex, alpha subunit 1, cardiac muscle    |

|         |         |          |          |    |   |              |         |                                                                                          |
|---------|---------|----------|----------|----|---|--------------|---------|------------------------------------------------------------------------------------------|
| 3806259 | 3806253 | 41918575 | 41918618 | 18 | - | NM_001001937 | ATP5A1  | ATP synthase, H+ transporting, mitochondrial F1 complex, alpha subunit 1, cardiac muscle |
| 3806261 | 3806253 | 41920104 | 41920134 | 18 | - | NM_001001937 | ATP5A1  | ATP synthase, H+ transporting, mitochondrial F1 complex, alpha subunit 1, cardiac muscle |
| 3807490 | 3807487 | 45269837 | 45269872 | 18 | - | NM_000985    | RPL17   | Ribosomal protein L17                                                                    |
| 3808602 | 3808600 | 49935247 | 49935281 | 18 | - | NM_003927    | MBD2    | Methyl-CpG binding domain protein 2                                                      |
| 3815415 | 3815399 | 989951   | 990056   | 19 | + | NM_004368    | WDR18   | WD repeat domain 18                                                                      |
| 3815662 | 3815649 | 1222596  | 1222627  | 19 | + | NM_001280    | CIRBP   | Cold inducible RNA binding protein                                                       |
| 3815664 | 3815649 | 1222990  | 1223050  | 19 | + | NM_001280    | CIRBP   | Cold inducible RNA binding protein                                                       |
| 3815669 | 3815649 | 1224068  | 1224101  | 19 | + | NM_001280    | CIRBP   | Cold inducible RNA binding protein                                                       |
| 3815718 | 3815710 | 1246544  | 1246589  | 19 | + | NM_001405    | EFNA2   | Ephrin-A2                                                                                |
| 3816399 | 3816380 | 2224058  | 2224092  | 19 | + | NM_004152    | OAZ1    | Ornithine decarboxylase antizyme 1                                                       |
| 3816400 | 3816380 | 2224161  | 2224214  | 19 | + | NM_004152    | OAZ1    | Ornithine decarboxylase antizyme 1                                                       |
| 3816403 | 3816380 | 2224445  | 2224479  | 19 | + | NM_004152    | OAZ1    | Ornithine decarboxylase antizyme 1                                                       |
| 3816517 | 3816509 | 2428052  | 2428161  | 19 | + | NM_015675    | GADD45B | Growth arrest and DNA-damage-inducible, beta                                             |
| 3816519 | 3816509 | 2428491  | 2428561  | 19 | + | NM_015675    | GADD45B | Growth arrest and DNA-damage-inducible, beta                                             |
| 3816525 | 3816509 | 2429030  | 2429182  | 19 | + | NM_015675    | GADD45B | Growth arrest and DNA-damage-inducible, beta                                             |
| 3817258 | 3817256 | 3958759  | 3958785  | 19 | + | AK022481     | PIAS4   | Protein inhibitor of activated STAT, 4                                                   |
| 3817455 | 3817437 | 4273984  | 4274019  | 19 | + | NM_024333    | FSD1    | Fibronectin type III and SPRY domain containing 1                                        |
| 3817563 | 3817546 | 4445182  | 4445215  | 19 | + | NM_001001520 | HDGF2   | Hepatoma-derived growth factor-related protein 2                                         |
| 3818083 | 3818076 | 5642347  | 5642456  | 19 | + | NM_015414    | RPL36   | Ribosomal protein L36                                                                    |
| 3818085 | 3818076 | 5642551  | 5642614  | 19 | + | NM_015414    | RPL36   | Ribosomal protein L36                                                                    |
| 3819546 | 3819543 | 8415883  | 8415984  | 19 | + | NM_005968    | HNRPM   | Heterogeneous nuclear ribonucleoprotein M                                                |
| 3820175 | 3820161 | 9801642  | 9801674  | 19 | + | CR590001     | UBL5    | Ubiquitin-like 5                                                                         |
| 3820491 | 3820469 | 10268161 | 10268186 | 19 | + | NM_003259    | ICAM5   | Intercellular adhesion molecule 5, telencephalin                                         |
| 3821896 | 3821893 | 12763599 | 12764024 | 19 | + | NM_002229    | JUNB    | Jun B proto-oncogene                                                                     |

|         |         |          |          |    |   |                 |          |                                                              |
|---------|---------|----------|----------|----|---|-----------------|----------|--------------------------------------------------------------|
| 3821899 | 3821893 | 12764733 | 12765034 | 19 | + | NM_002229       | JUNB     | Jun B proto-oncogene                                         |
| 3821916 | 3821908 | 12778449 | 12778486 | 19 | + | NM_006397       | RNASEH2A | Ribonuclease H2, subunit A                                   |
| 3822223 | 3822216 | 13125947 | 13126385 | 19 | + | NM_004907       | IER2     | Immediate early response 2                                   |
| 3823539 | 3823511 | 16065515 | 16065540 | 19 | + | Z36778          | TPM4     | Tropomyosin 4                                                |
| 3823543 | 3823511 | 16073088 | 16073125 | 19 | + | NM_003290       | TPM4     | Tropomyosin 4                                                |
| 3824213 | 3824212 | 17281379 | 17281410 | 19 | + | ENST00000359866 |          | similar to CG31855-PA (LOC401770), mRNA gene:ENSG00000130311 |
| 3824387 | 3824366 | 17833920 | 17834020 | 19 | + | X80822          | RPL18A   | Ribosomal protein L18a                                       |
| 3824393 | 3824366 | 17834989 | 17835040 | 19 | + | NM_000980       | RPL18A   | Ribosomal protein L18a                                       |
| 3824887 | 3824874 | 18149798 | 18149843 | 19 | + | NM_006332       | IFI30    | Interferon, gamma-inducible protein 30                       |
| 3825214 | 3825201 | 18546688 | 18546751 | 19 | + | NM_003333       | UBA52    | Ubiquitin A-52 residue ribosomal protein fusion product 1    |
| 3825216 | 3825201 | 18546877 | 18546905 | 19 | + | NM_003333       | UBA52    | Ubiquitin A-52 residue ribosomal protein fusion product 1    |
| 3825217 | 3825201 | 18546913 | 18546951 | 19 | + | NM_003333       | UBA52    | Ubiquitin A-52 residue ribosomal protein fusion product 1    |
| 3825218 | 3825201 | 18546962 | 18547036 | 19 | + | NM_003333       | UBA52    | Ubiquitin A-52 residue ribosomal protein fusion product 1    |
| 3827231 | 3827218 | 23802085 | 23802127 | 19 | + | NM_001012321    | RPSA     | Ribosomal protein SA                                         |
| 3827234 | 3827218 | 23802335 | 23802394 | 19 | + | NM_001012321    | RPSA     | Ribosomal protein SA                                         |
| 3827235 | 3827218 | 23802453 | 23802609 | 19 | + | NM_001012321    | RPSA     | Ribosomal protein SA                                         |
| 3827236 | 3827218 | 23802692 | 23802720 | 19 | + | NM_001012321    | RPSA     | Ribosomal protein SA                                         |
| 3830652 | 3830649 | 40831071 | 40831143 | 19 | + | NM_001863       | COX6B1   | Cytochrome c oxidase subunit Vib polypeptide 1 (ubiquitous)  |
| 3830656 | 3830649 | 40837331 | 40837360 | 19 | + | NM_001863       | COX6B1   | Cytochrome c oxidase subunit Vib polypeptide 1 (ubiquitous)  |
| 3831515 | 3831514 | 41870400 | 41870428 | 19 | + | BX640706        | ZNF567   | Zinc finger protein 567                                      |
| 3832438 | 3832435 | 43585634 | 43585688 | 19 | + | NM_174905       | FAM98C   | Family with sequence similarity 98, member C                 |
| 3832641 | 3832616 | 43819369 | 43819395 | 19 | + | NM_013234       | EIF3S12  | Eukaryotic translation initiation factor 3, subunit 12       |
| 3832644 | 3832643 | 43830180 | 43830212 | 19 | + | NM_004924       | ACTN4    | Actinin, alpha 4                                             |



|         |         |          |          |    |   |           |         |                                                                |
|---------|---------|----------|----------|----|---|-----------|---------|----------------------------------------------------------------|
| 3832987 | 3832978 | 44590500 | 44591099 | 19 | + | NM_003407 | ZFP36   | Zinc finger protein 36, C3H type, homolog (mouse)              |
| 3832988 | 3832978 | 44591189 | 44591746 | 19 | + | NM_003407 | ZFP36   | Zinc finger protein 36, C3H type, homolog (mouse)              |
| 3833049 | 3833040 | 44635836 | 44635866 | 19 | + | NM_003169 | SUPT5H  | Suppressor of Ty 5 homolog (S. cerevisiae)                     |
| 3834197 | 3834176 | 46581535 | 46581575 | 19 | + | AK130820  | BCKDHA  | Branched chain keto acid dehydrogenase E1, alpha polypeptide   |
| 3834473 | 3834465 | 47056695 | 47056730 | 19 | + | NM_001022 | RPS19   | Ribosomal protein S19                                          |
| 3834474 | 3834465 | 47057040 | 47057071 | 19 | + | NM_001022 | RPS19   | Ribosomal protein S19                                          |
| 3834475 | 3834465 | 47057077 | 47057117 | 19 | + | NM_001022 | RPS19   | Ribosomal protein S19                                          |
| 3834488 | 3834465 | 47064954 | 47064989 | 19 | + | NM_001022 | RPS19   | Ribosomal protein S19                                          |
| 3834492 | 3834465 | 47065609 | 47065663 | 19 | + | NM_001022 | RPS19   | Ribosomal protein S19                                          |
| 3834496 | 3834465 | 47067259 | 47067285 | 19 | + | NM_001022 | RPS19   | Ribosomal protein S19                                          |
| 3835919 | 3835911 | 50140469 | 50140534 | 19 | + | NM_001646 | TOMM40  | Translocase of outer mitochondrial membrane 40 homolog (yeast) |
| 3836335 | 3836317 | 50717597 | 50717631 | 19 | + | NM_003370 | VASP    | Vasodilator-stimulated phosphoprotein                          |
| 3836861 | 3836841 | 51804311 | 51804368 | 19 | + | NM_005184 | CALM3   | Calmodulin 3 (phosphorylase kinase, delta)                     |
| 3837142 | 3837132 | 52326028 | 52326062 | 19 | + | NM_005500 | SAE1    | SUMO1 activating enzyme subunit 1                              |
| 3837483 | 3837464 | 52950499 | 52950532 | 19 | + | NM_015710 | GLTSCR2 | Glioma tumor suppressor candidate region gene 2                |
| 3838097 | 3838094 | 54160595 | 54160654 | 19 | + | NM_000146 | FTL     | Ferritin, light polypeptide                                    |
| 3838099 | 3838094 | 54160841 | 54160978 | 19 | + | NM_000146 | FTL     | Ferritin, light polypeptide                                    |
| 3838102 | 3838094 | 54161372 | 54161409 | 19 | + | NM_000146 | FTL     | Ferritin, light polypeptide                                    |
| 3838104 | 3838094 | 54161682 | 54161745 | 19 | + | NM_000146 | FTL     | Ferritin, light polypeptide                                    |
| 3838106 | 3838094 | 54161813 | 54161849 | 19 | + | NM_000146 | FTL     | Ferritin, light polypeptide                                    |
| 3838107 | 3838094 | 54161851 | 54161879 | 19 | + | NM_000146 | FTL     | Ferritin, light polypeptide                                    |
| 3838108 | 3838094 | 54161880 | 54161907 | 19 | + | NM_000146 | FTL     | Ferritin, light polypeptide                                    |
| 3838599 | 3838575 | 54686500 | 54686533 | 19 | + | NM_012423 | RPL13A  | Ribosomal protein L13a                                         |
| 3838600 | 3838575 | 54686580 | 54686616 | 19 | + | NM_012423 | RPL13A  | Ribosomal protein L13a                                         |
| 3838602 | 3838575 | 54686800 | 54686832 | 19 | + | NM_012423 | RPL13A  | Ribosomal protein L13a                                         |
| 3838609 | 3838605 | 54692352 | 54692394 | 19 | + | NM_001015 | RPS11   | Ribosomal protein S11                                          |
| 3838612 | 3838605 | 54692589 | 54692661 | 19 | + | NM_001015 | RPS11   | Ribosomal protein S11                                          |

|         |         |          |          |    |   |           |          |                                                                       |
|---------|---------|----------|----------|----|---|-----------|----------|-----------------------------------------------------------------------|
| 3838615 | 3838605 | 54693013 | 54693090 | 19 | + | NM_001015 | RPS11    | Ribosomal protein S11                                                 |
| 3838619 | 3838605 | 54694581 | 54694684 | 19 | + | NM_001015 | RPS11    | Ribosomal protein S11                                                 |
| 3838656 | 3838624 | 54721162 | 54721188 | 19 | + | NM_004107 | FCGRT    | Fc fragment of IgG, receptor, transporter, alpha                      |
| 3839306 | 3839305 | 55579408 | 55579454 | 19 | + | NM_002691 | POLD1    | Polymerase (DNA directed), delta 1, catalytic subunit 125kDa          |
| 3841345 | 3841332 | 59402035 | 59402064 | 19 | + | BC058892  | RPS9     | Ribosomal protein S9                                                  |
| 3841351 | 3841332 | 59403123 | 59403199 | 19 | + | BC058892  | RPS9     | Ribosomal protein S9                                                  |
| 3841352 | 3841332 | 59403263 | 59403294 | 19 | + | BC058892  | RPS9     | Ribosomal protein S9                                                  |
| 3842106 | 3842105 | 60543078 | 60543127 | 19 | + | NM_032701 | SUV420H2 | Suppressor of variegation 4-20 homolog 2 (Drosophila)                 |
| 3843158 | 3843156 | 62483987 | 62484016 | 19 | + | NM_006635 | ZNF460   | Zinc finger protein 460                                               |
| 3844027 | 3844015 | 63597709 | 63597774 | 19 | + | NM_001009 | RPS5     | Ribosomal protein S5                                                  |
| 3846012 | 3846011 | 2705726  | 2705755  | 19 | - | NM_003021 | SGTA     | Small glutamine-rich tetratricopeptide repeat (TPR)-containing, alpha |
| 3846103 | 3846076 | 2970298  | 2970447  | 19 | - | NM_003260 | TLE2     | Transducin-like enhancer of split 2 (E(sp1) homolog, Drosophila)      |
| 3846775 | 3846742 | 4351321  | 4351365  | 19 | - | NM_003025 | SH3GL1   | SH3-domain GRB2-like 1                                                |
| 3846808 | 3846783 | 4408758  | 4408788  | 19 | - | NM_025241 | UBXD1    | UBX domain containing 1                                               |
| 3847006 | 3847005 | 4789372  | 4789419  | 19 | - | NM_005817 | M6PRBP1  | Mannose-6-phosphate receptor binding protein 1                        |
| 3847007 | 3847005 | 4789425  | 4789478  | 19 | - | NM_005817 | M6PRBP1  | Mannose-6-phosphate receptor binding protein 1                        |
| 3847543 | 3847538 | 5868633  | 5868663  | 19 | - | NM_003624 | RANBP3   | RAN binding protein 3                                                 |
| 3848121 | 3848118 | 6681323  | 6681354  | 19 | - | BC007862  | GPR108   | G protein-coupled receptor 108                                        |
| 3850262 | 3850261 | 10305466 | 10305529 | 19 | - | NM_002162 | ICAM3    | Intercellular adhesion molecule 3                                     |
| 3850263 | 3850261 | 10305564 | 10305683 | 19 | - | NM_002162 | ICAM3    | Intercellular adhesion molecule 3                                     |
| 3850446 | 3850445 | 10538301 | 10538509 | 19 | - | NM_001800 | CDKN2D   | Cyclin-dependent kinase inhibitor 2D (p19, inhibits CDK4)             |
| 3850778 | 3850725 | 11208503 | 11208540 | 19 | - | NM_020812 | DOCK6    | Dedicator of cytokinesis 6                                            |
| 3851183 | 3851150 | 11986561 | 11986658 | 19 | - | BC047412  | ZNF433   | Zinc finger protein 433                                               |
| 3852067 | 3852034 | 13088214 | 13088245 | 19 | - | NM_017722 | TRMT1    | TRM1 tRNA methyltransferase 1 homolog (S. cerevisiae)                 |
| 3852203 | 3852133 | 13270622 | 13270650 | 19 | - | NM_023035 | CACNA1A  | Calcium channel, voltage-dependent, P/Q type, alpha 1A subunit        |

|         |         |          |          |    |   |              |          |                                                    |
|---------|---------|----------|----------|----|---|--------------|----------|----------------------------------------------------|
| 3853341 | 3853299 | 15348797 | 15348825 | 19 | - | NM_005858    | AKAP8    | A kinase (PRKA) anchor protein 8                   |
| 3853939 | 3853922 | 16467959 | 16467989 | 19 | - | NM_145046    | CALR3    | Calreticulin 3                                     |
| 3859810 | 3859809 | 40706119 | 40706234 | 19 | - | NM_198538    | SBSN     | Suprabasin                                         |
| 3860102 | 3860101 | 41070549 | 41070693 | 19 | - | BC006273     | TA-NFKBH | T-cell activation NFKB-like protein                |
| 3860139 | 3860137 | 41087195 | 41087310 | 19 | - | NM_003332    | TYROBP   | TYRO protein tyrosine kinase binding protein       |
| 3861949 | 3861948 | 44510905 | 44510945 | 19 | - | NM_004877    | GMFG     | Glia maturation factor, gamma                      |
| 3861950 | 3861948 | 44510998 | 44511028 | 19 | - | NM_004877    | GMFG     | Glia maturation factor, gamma                      |
| 3861953 | 3861948 | 44511497 | 44511553 | 19 | - | NM_004877    | GMFG     | Glia maturation factor, gamma                      |
| 3861954 | 3861948 | 44512048 | 44512099 | 19 | - | NM_004877    | GMFG     | Glia maturation factor, gamma                      |
| 3861957 | 3861948 | 44515565 | 44515591 | 19 | - | NM_004877    | GMFG     | Glia maturation factor, gamma                      |
| 3861961 | 3861948 | 44517758 | 44517786 | 19 | - | NM_004877    | GMFG     | Glia maturation factor, gamma                      |
| 3861963 | 3861948 | 44517928 | 44517996 | 19 | - | NM_004877    | GMFG     | Glia maturation factor, gamma                      |
| 3862020 | 3862018 | 44615726 | 44615752 | 19 | - | NM_001020    | RPS16    | Ribosomal protein S16                              |
| 3862021 | 3862018 | 44615802 | 44615829 | 19 | - | NM_001020    | RPS16    | Ribosomal protein S16                              |
| 3862022 | 3862018 | 44615830 | 44615868 | 19 | - | NM_001020    | RPS16    | Ribosomal protein S16                              |
| 3862024 | 3862018 | 44616002 | 44616033 | 19 | - | NM_001020    | RPS16    | Ribosomal protein S16                              |
| 3862026 | 3862018 | 44616167 | 44616200 | 19 | - | NM_001020    | RPS16    | Ribosomal protein S16                              |
| 3862168 | 3862167 | 45016951 | 45017017 | 19 | - | NM_001436    | FBL      | Fibrillarin                                        |
| 3862170 | 3862167 | 45017150 | 45017214 | 19 | - | NM_001436    | FBL      | Fibrillarin                                        |
| 3862626 | 3862611 | 45601497 | 45601584 | 19 | - | NM_020956    | PRX      | Periaxin                                           |
| 3863325 | 3863323 | 47152838 | 47152882 | 19 | - | NM_006423    | RABAC1   | Rab acceptor 1 (prenylated)                        |
| 3863598 | 3863597 | 47583031 | 47583122 | 19 | - | NM_032488    | CNFN     | Cornifelin                                         |
| 3863599 | 3863597 | 47583149 | 47583233 | 19 | - | NM_032488    | CNFN     | Cornifelin                                         |
| 3863600 | 3863597 | 47583335 | 47583465 | 19 | - | NM_032488    | CNFN     | Cornifelin                                         |
| 3864558 | 3864551 | 48844627 | 48844791 | 19 | - | NM_001005377 | PLAUR    | Plasminogen activator, urokinase receptor          |
| 3866303 | 3866302 | 52033280 | 52033309 | 19 | - | NM_004069    | AP2S1    | Adaptor-related protein complex 2, sigma 1 subunit |
| 3867929 | 3867928 | 54750792 | 54750819 | 19 | - | NM_015953    | NOSIP    | Nitric oxide synthase interacting protein          |
| 3867976 | 3867965 | 54835138 | 54835167 | 19 | - | NM_006270    | RRAS     | Related RAS viral (r-ras) oncogene homolog         |
| 3868258 | 3868257 | 55144154 | 55144362 | 19 | - | NM_052884    | NUP62    | Nucleoporin 62kDa                                  |

|         |         |          |          |    |   |           |          |                                                                                          |
|---------|---------|----------|----------|----|---|-----------|----------|------------------------------------------------------------------------------------------|
| 3868289 | 3868283 | 55176803 | 55176855 | 19 | - | BC023556  | VRK3     | Vaccinia related kinase 3                                                                |
| 3869239 | 3869237 | 56940903 | 56941000 | 19 | - | NM_002029 | FPR1     | Formyl peptide receptor 1                                                                |
| 3869241 | 3869237 | 56941069 | 56941137 | 19 | - | NM_002029 | FPR1     | Formyl peptide receptor 1                                                                |
| 3870571 | 3870570 | 59368959 | 59369525 | 19 | - | NM_024298 | LENG4    | Leukocyte receptor cluster (LRC) member 4                                                |
| 3870589 | 3870570 | 59385034 | 59385062 | 19 | - | NM_024298 | LENG4    | Leukocyte receptor cluster (LRC) member 4                                                |
| 3871149 | 3871142 | 60362581 | 60362627 | 19 | - | NM_178837 | C19orf51 | Chromosome 19 open reading frame 51                                                      |
| 3871612 | 3871609 | 60825002 | 60825030 | 19 | - | NM_203374 | ZNF784   | Zinc finger protein 784                                                                  |
| 3872855 | 3872849 | 63560476 | 63560509 | 19 | - | NM_198458 | ZNF497   | Zinc finger protein 497                                                                  |
| 3872984 | 3872983 | 63754787 | 63754821 | 19 | - | NM_014453 | CHMP2A   | Chromatin modifying protein 2A                                                           |
| 3873773 | 3873744 | 2269108  | 2269218  | 20 | + | NM_003245 | TGM3     | Transglutaminase 3 (E polypeptide, protein-glutamine-gamma-glutamyltransferase)          |
| 3873775 | 3873744 | 2269400  | 2269456  | 20 | + | NM_003245 | TGM3     | Transglutaminase 3 (E polypeptide, protein-glutamine-gamma-glutamyltransferase)          |
| 3874610 | 3874604 | 3953100  | 3953136  | 20 | + | M10119    | FTL      | Ferritin, light polypeptide                                                              |
| 3874611 | 3874604 | 3953142  | 3953174  | 20 | + | M10119    | FTL      | Ferritin, light polypeptide                                                              |
| 3878575 | 3878533 | 18692210 | 18692239 | 20 | + | NM_080820 | HARS2    | Histidyl-tRNA synthetase 2                                                               |
| 3882216 | 3882214 | 31083142 | 31083181 | 20 | + | NM_174897 | BPIL3    | Bactericidal/permeability-increasing protein-like 3                                      |
| 3882684 | 3882681 | 31862936 | 31862971 | 20 | + | NM_176812 | CHMP4B   | Chromatin modifying protein 4B                                                           |
| 3882710 | 3882681 | 31905743 | 31905817 | 20 | + | NM_176812 | CHMP4B   | Chromatin modifying protein 4B                                                           |
| 3882764 | 3882720 | 32128501 | 32128605 | 20 | + | NM_016732 | RALY     | RNA binding protein, autoantigenic (hnRNP-associated with lethal yellow homolog (mouse)) |
| 3883383 | 3883382 | 33593212 | 33593242 | 20 | + | NM_198398 | ERGIC3   | ERGIC and golgi 3                                                                        |
| 3883985 | 3883971 | 34673925 | 34674040 | 20 | + | AF274948  | C20orf24 | Chromosome 20 open reading frame 24                                                      |
| 3883986 | 3883971 | 34674060 | 34674186 | 20 | + | AF274948  | C20orf24 | Chromosome 20 open reading frame 24                                                      |
| 3884893 | 3884892 | 36988375 | 36988409 | 20 | + | NM_030919 | FAM83D   | Family with sequence similarity 83, member D                                             |

|         |         |          |          |    |   |                    |           |                                                                      |
|---------|---------|----------|----------|----|---|--------------------|-----------|----------------------------------------------------------------------|
| 3886706 | 3886704 | 43028588 | 43028623 | 20 | + | NM_006282          | STK4      | Serine/threonine kinase 4                                            |
| 3886768 | 3886765 | 43237939 | 43238130 | 20 | + | GENSCAN00000046594 | PI3       | Peptidase inhibitor 3, skin-derived (SKALP)                          |
| 3886770 | 3886765 | 43238467 | 43238557 | 20 | + | NM_002638          | PI3       | Peptidase inhibitor 3, skin-derived (SKALP)                          |
| 3887456 | 3887452 | 44771684 | 44771775 | 20 | + | NM_030777          | SLC2A10   | Solute carrier family 2 (facilitated glucose transporter), member 10 |
| 3888623 | 3888613 | 48242325 | 48242465 | 20 | + | NM_005194          | CEBPB     | CCAAT/enhancer binding protein (C/EBP), beta                         |
| 3888723 | 3888721 | 48560356 | 48560392 | 20 | + | NM_002827          | PTPN1     | Protein tyrosine phosphatase, non-receptor type 1                    |
| 3890257 | 3890218 | 54527240 | 54527334 | 20 | + | NM_016407          | C20orf43  | Chromosome 20 open reading frame 43                                  |
| 3891256 | 3891163 | 56919157 | 56919266 | 20 | + | AF088185           | GNAS      | GNAS complex locus                                                   |
| 3892672 | 3892660 | 60396316 | 60396365 | 20 | + | NM_001024          | RPS21     | Ribosomal protein S21                                                |
| 3892675 | 3892660 | 60396773 | 60396815 | 20 | + | NM_001024          | RPS21     | Ribosomal protein S21                                                |
| 3892990 | 3892974 | 60926776 | 60926811 | 20 | + | NM_001853          | COL9A3    | Collagen, type IX, alpha 3                                           |
| 3893469 | 3893458 | 61623813 | 61623910 | 20 | + | NM_024299          | C20orf149 | Chromosome 20 open reading frame 149                                 |
| 3893470 | 3893458 | 61623917 | 61623952 | 20 | + | NM_024299          | C20orf149 | Chromosome 20 open reading frame 149                                 |
| 3893792 | 3893760 | 61993251 | 61993315 | 20 | + | NM_003288          | TPD52L2   | Tumor protein D52-like 2                                             |
| 3894603 | 3894601 | 1297709  | 1297736  | 20 | - | NM_000801          | FKBP1A    | FK506 binding protein 1A, 12kDa                                      |
| 3894999 | 3894995 | 2390308  | 2390334  | 20 | - | NM_003091          | SNRPB     | Small nuclear ribonucleoprotein polypeptides B and B1                |
| 3899546 | 3899495 | 18395644 | 18395671 | 20 | - | NM_018152          | C20orf12  | Chromosome 20 open reading frame 12                                  |
| 3899555 | 3899551 | 18417101 | 18417130 | 20 | - | NM_006606          | RBBP9     | Retinoblastoma binding protein 9                                     |
| 3903290 | 3903288 | 32140942 | 32141077 | 20 | - | NM_003908          | EIF2S2    | Eukaryotic translation initiation factor 2, subunit 2 beta, 38kDa    |
| 3907194 | 3907190 | 43314365 | 43314412 | 20 | - | NM_003064          | SLPI      | Secretory leukocyte peptidase inhibitor                              |
| 3907196 | 3907190 | 43315068 | 43315190 | 20 | - | NM_003064          | SLPI      | Secretory leukocyte peptidase inhibitor                              |

|         |         |          |          |    |   |              |          |                                                                                |
|---------|---------|----------|----------|----|---|--------------|----------|--------------------------------------------------------------------------------|
| 3911801 | 3911795 | 57038771 | 57038850 | 20 | - | NM_001001977 | ATP5E    | ATP synthase, H+ transporting, mitochondrial F1 complex, epsilon subunit       |
| 3918537 | 3918535 | 33560641 | 33560689 | 21 | + | NM_000628    | IL10RB   | Interleukin 10 receptor, beta                                                  |
| 3927181 | 3927175 | 26018775 | 26018804 | 21 | - | NM_001685    | ATP5J    | ATP synthase, H+ transporting, mitochondrial F0 complex, subunit F6            |
| 3927186 | 3927175 | 26023844 | 26023944 | 21 | - | NM_001685    | ATP5J    | ATP synthase, H+ transporting, mitochondrial F0 complex, subunit F6            |
| 3927271 | 3927226 | 26269297 | 26269328 | 21 | - | NM_201413    | APP      | Amyloid beta (A4) precursor protein (peptidase nexin-II, Alzheimer disease)    |
| 3934000 | 3933999 | 43386221 | 43386259 | 21 | - | NM_001025204 | U2AF1    | U2 small nuclear RNA auxiliary factor 1                                        |
| 3934001 | 3933999 | 43386281 | 43386310 | 21 | - | NM_001025204 | U2AF1    | U2 small nuclear RNA auxiliary factor 1                                        |
| 3934250 | 3934245 | 44018306 | 44018473 | 21 | - | NM_000100    | CSTB     | Cystatin B (stefin B)                                                          |
| 3934251 | 3934245 | 44018481 | 44018510 | 21 | - | NM_000100    | CSTB     | Cystatin B (stefin B)                                                          |
| 3934252 | 3934245 | 44018516 | 44018615 | 21 | - | NM_000100    | CSTB     | Cystatin B (stefin B)                                                          |
| 3934254 | 3934245 | 44018967 | 44019030 | 21 | - | NM_000100    | CSTB     | Cystatin B (stefin B)                                                          |
| 3934731 | 3934729 | 45130411 | 45130657 | 21 | - | NM_000211    | ITGB2    | Integrin, beta 2 (complement component 3 receptor 3 and 4 subunit)             |
| 3938198 | 3938175 | 20306056 | 20306084 | 22 | + | NM_003347    | UBE2L3   | Ubiquitin-conjugating enzyme E2L 3                                             |
| 3944047 | 3944046 | 33983499 | 33983550 | 22 | + | NM_005487    | HMG2L1   | High-mobility group protein 2-like 1                                           |
| 3944560 | 3944543 | 35603636 | 35603806 | 22 | + | NM_013416    | NCF4     | Neutrophil cytosolic factor 4, 40kDa                                           |
| 3944561 | 3944543 | 35603909 | 35603978 | 22 | + | NM_013416    | NCF4     | Neutrophil cytosolic factor 4, 40kDa                                           |
| 3945533 | 3945515 | 37688656 | 37688908 | 22 | + | NM_145699    | APOBEC3A | Apolipoprotein B mRNA editing enzyme, catalytic polypeptide-like 3A            |
| 3945932 | 3945914 | 38248554 | 38248602 | 22 | + | NM_001675    | ATF4     | Activating transcription factor 4 (tax-responsive enhancer element B67)        |
| 3946921 | 3946889 | 40249841 | 40249885 | 22 | + | NM_001098    | ACO2     | Aconitase 2, mitochondrial                                                     |
| 3948321 | 3948259 | 43561003 | 43561071 | 22 | + | NM_181335    | PRR5     | Proline rich 5 (renal)                                                         |
| 3951159 | 3951136 | 49584407 | 49584436 | 22 | + | XM_929847    | MGC2752  | Hypothetical protein MGC2752                                                   |
| 3952709 | 3952703 | 17811863 | 17811911 | 22 | - | NM_173793    | HIRA     | HIR histone cell cycle regulation defective homolog A ( <i>S. cerevisiae</i> ) |
| 3954927 | 3954910 | 22509962 | 22509993 | 22 | - | NM_198440    | DERL3    | Der1-like domain family, member 3                                              |
| 3957189 | 3957188 | 28988927 | 28989621 | 22 | - | NM_020530    | OSM      | Oncostatin M                                                                   |
| 3959291 | 3959290 | 34564304 | 34564331 | 22 | - | AF153482     | RPL41    | Ribosomal protein L41                                                          |

|         |         |          |          |   |    |   |              |         |                                                                                         |
|---------|---------|----------|----------|---|----|---|--------------|---------|-----------------------------------------------------------------------------------------|
| 3959632 | 3959631 | 35236886 | 35236962 |   | 22 | - | NM_003753    | EIF3S7  | Eukaryotic translation initiation factor 3, subunit 7 zeta, 66/67kDa                    |
| 3960063 | 3960061 | 35951355 | 35951737 |   | 22 | - | NM_002872    | RAC2    | Ras-related C3 botulinum toxin substrate 2 (rho family, small GTP binding protein Rac2) |
| 3960165 | 3960133 | 36245083 | 36245110 |   | 22 | - | NM_014550    | CARD10  | Caspase recruitment domain family, member 10                                            |
| 3960940 | 3960930 | 37592164 | 37592195 |   | 22 | - | NM_014292    | CBX6    | Chromobox homolog 6                                                                     |
| 3961108 | 3961106 | 38038904 | 38038935 |   | 22 | - | NM_001033853 | RPL3    | Ribosomal protein L3                                                                    |
| 3961110 | 3961106 | 38039153 | 38039186 |   | 22 | - | NM_001033853 | RPL3    | Ribosomal protein L3                                                                    |
| 3961111 | 3961106 | 38039216 | 38039245 |   | 22 | - | NM_001033853 | RPL3    | Ribosomal protein L3                                                                    |
| 3961114 | 3961106 | 38039626 | 38039676 |   | 22 | - | NM_001033853 | RPL3    | Ribosomal protein L3                                                                    |
| 3961119 | 3961106 | 38040063 | 38040092 |   | 22 | - | NM_001033853 | HLA-B   | Major histocompatibility complex, class I, B                                            |
| 3961120 | 3961106 | 38040115 | 38040159 |   | 22 | - | NM_001033853 | HLA-B   | Major histocompatibility complex, class I, B                                            |
| 3962562 | 3962560 | 41365837 | 41365917 |   | 22 | - | AF092923     | CYB5R3  | Cytochrome b5 reductase 3                                                               |
| 3963713 | 3963676 | 44001357 | 44001382 |   | 22 | - | BC053595     | C22orf9 | Chromosome 22 open reading frame 9                                                      |
| 3965774 | 3965751 | 49038813 | 49038856 |   | 22 | - | NM_002969    | MAPK12  | Mitogen-activated protein kinase 12                                                     |
| 3965909 | 3965833 | 49252958 | 49252985 |   | 22 | - | NM_002972    | SBF1    | SET binding factor 1                                                                    |
| 3966299 | 3966271 | 156008   | 156035   | X |    | + | NM_018390    | PLCXD1  | Phosphatidylinositol-specific phospholipase C, X domain containing 1                    |
| 3969150 | 3969133 | 12905198 | 12905251 | X |    | + | NM_021109    | TMSB4X  | Thymosin, beta 4, X-linked                                                              |
| 3971811 | 3971806 | 23711408 | 23711448 | X |    | + | NM_002970    | SAT1    | Spermidine/spermine N1-acetyltransferase 1                                              |
| 3971815 | 3971806 | 23711868 | 23711903 | X |    | + | NM_002970    | SAT1    | Spermidine/spermine N1-acetyltransferase 1                                              |
| 3971822 | 3971806 | 23713394 | 23713466 | X |    | + | NM_002970    | SAT1    | Spermidine/spermine N1-acetyltransferase 1                                              |
| 3971824 | 3971806 | 23713558 | 23713583 | X |    | + | AF251292     | SAT1    | Spermidine/spermine N1-acetyltransferase 1                                              |
| 3971826 | 3971806 | 23713726 | 23713868 | X |    | + | AF251292     | SAT1    | Spermidine/spermine N1-acetyltransferase 1                                              |

|         |         |           |           |   |   |                 |          |                                                                                                                                |
|---------|---------|-----------|-----------|---|---|-----------------|----------|--------------------------------------------------------------------------------------------------------------------------------|
| 3971827 | 3971806 | 23713895  | 23713925  | X | + | CR590358        | SAT1     | Spermidine/spermine N1-acetyltransferase 1                                                                                     |
| 3971828 | 3971806 | 23713998  | 23714210  | X | + | AF251292        | SAT1     | Spermidine/spermine N1-acetyltransferase 1                                                                                     |
| 3978177 | 3978169 | 53128950  | 53128976  | X | + | NM_022117       | TSPYL2   | TSPY-like 2                                                                                                                    |
| 3979932 | 3979912 | 66683051  | 66683082  | X | + | NM_000044       | AR       | Androgen receptor (dihydrotestosterone receptor; testicular feminization; spinal and bulbar muscular atrophy; Kennedy disease) |
| 3980386 | 3980380 | 68753274  | 68753303  | X | + | NM_001005611    | EDA      | Ectodysplasin A                                                                                                                |
| 3980748 | 3980745 | 70233219  | 70233266  | X | + | NM_005938       | MLLT7    | Myeloid/lymphoid or mixed-lineage leukemia (trithorax homolog, Drosophila); translocated to, 7                                 |
| 3981368 | 3981361 | 71296753  | 71296797  | X | + | NM_207422       | FLJ44635 | TPT1-like protein                                                                                                              |
| 3982488 | 3982462 | 77267951  | 77267983  | X | + | NM_000291       | PGK1     | Phosphoglycerate kinase 1                                                                                                      |
| 3984771 | 3984766 | 100533399 | 100533457 | X | + | NM_021029       | RPL36A   | Ribosomal protein L36a                                                                                                         |
| 3984773 | 3984766 | 100536997 | 100537068 | X | + | NM_021029       | RPL36A   | Ribosomal protein L36a                                                                                                         |
| 3988648 | 3988638 | 117992658 | 117992686 | X | + | ENST00000365713 |          | LON peptidase N-terminal domain and ring finger 3 (LONRF3), transcript variant 2, mRNA gene:ENSG00000175556                    |
| 3988990 | 3988987 | 118889956 | 118890004 | X | + | NM_004541       | NDUFA1   | NADH dehydrogenase (ubiquinone) 1 alpha subcomplex, 1, 7.5kDa                                                                  |
| 3988991 | 3988987 | 118891309 | 118891384 | X | + | NM_004541       | NDUFA1   | NADH dehydrogenase (ubiquinone) 1 alpha subcomplex, 1, 7.5kDa                                                                  |
| 3988994 | 3988987 | 118894561 | 118894632 | X | + | NM_004541       | NDUFA1   | NADH dehydrogenase (ubiquinone) 1 alpha subcomplex, 1, 7.5kDa                                                                  |
| 3990683 | 3990616 | 129018397 | 129018437 | X | + | NM_021946       | BCORL1   | BCL6 co-repressor-like 1                                                                                                       |
| 3995948 | 3995946 | 152699741 | 152699769 | X | + | NM_014370       | SRPK3    | SFRS protein kinase 3                                                                                                          |
| 3996325 | 3996306 | 153281029 | 153281097 | X | + | NM_006013       | RPL10    | Ribosomal protein L10                                                                                                          |
| 3996331 | 3996306 | 153282011 | 153282092 | X | + | NM_006013       | RPL10    | Ribosomal protein L10                                                                                                          |
| 3996332 | 3996306 | 153282105 | 153282161 | X | + | NM_006013       | RPL10    | Ribosomal protein L10                                                                                                          |
| 3996335 | 3996306 | 153282261 | 153282356 | X | + | NM_006013       | RPL10    | Ribosomal protein L10                                                                                                          |



|         |         |           |           |   |   |              |           |                                                                                                                                                                                |
|---------|---------|-----------|-----------|---|---|--------------|-----------|--------------------------------------------------------------------------------------------------------------------------------------------------------------------------------|
| 3997377 | 3997360 | 1465179   | 1465423   | X | - | NM_001636    | SLC25A6   | Solute carrier family 25 (mitochondrial carrier; adenine nucleotide translocator), member 6                                                                                    |
| 3997378 | 3997360 | 1465524   | 1465582   | X | - | NM_001636    | SLC25A6   | Solute carrier family 25 (mitochondrial carrier; adenine nucleotide translocator), member 6                                                                                    |
| 3997989 | 3997946 | 3641617   | 3641649   | X | - | NM_005044    | PRKX      | Protein kinase, X-linked                                                                                                                                                       |
| 4002841 | 4002840 | 23764723  | 23764751  | X | - | BC012149     | RPL9      | Ribosomal protein L9                                                                                                                                                           |
| 4006869 | 4006841 | 46406492  | 46406519  | X | - | NM_032591    | SLC9A7    | Solute carrier family 9 (sodium/hydrogen exchanger), member 7                                                                                                                  |
| 4007679 | 4007643 | 48699351  | 48699383  | X | - | NM_017602    | OTUD5     | OTU domain containing 5                                                                                                                                                        |
| 4008581 | 4008562 | 51824337  | 51824368  | X | - | CR604784     |           | full-length cDNA clone CS0DF035YH07 of Fetal brain of Homo sapiens (human).                                                                                                    |
| 4012159 | 4012154 | 71409215  | 71409244  | X | - | NM_001007    | RPS4X     | Ribosomal protein S4, X-linked                                                                                                                                                 |
| 4012160 | 4012154 | 71409256  | 71409336  | X | - | NM_001007    | RPS4X     | Ribosomal protein S4, X-linked                                                                                                                                                 |
| 4012162 | 4012154 | 71409819  | 71409851  | X | - | NM_001007    | RPS4X     | Ribosomal protein S4, X-linked                                                                                                                                                 |
| 4012169 | 4012154 | 71412144  | 71412184  | X | - | NM_001007    | RPS4X     | Ribosomal protein S4, X-linked                                                                                                                                                 |
| 4014070 | 4014029 | 83329498  | 83329525  | X | - | NM_014496    | RPS6KA6   | Ribosomal protein S6 kinase, 90kDa, polypeptide 6                                                                                                                              |
| 4014399 | 4014387 | 86845296  | 86845355  | X | - | XM_372048    | LOC389672 | Similar to 40S ribosomal protein SA (p40) (34/67 kDa laminin receptor) (Colon carcinoma laminin-binding protein) (NEM/1CHD4) (Multidrug resistance-associated protein MGr1-Ag) |
| 4015894 | 4015884 | 100799177 | 100799230 | X | - | NM_177949    | ARMCX2    | Armadillo repeat containing, X-linked 2                                                                                                                                        |
| 4019544 | 4019539 | 118804523 | 118804595 | X | - | BC070205     | RPL39     | Ribosomal protein L39                                                                                                                                                          |
| 4022698 | 4022690 | 133506336 | 133506378 | X | - | XM_001128419 |           | PREDICTED: Homo sapiens hypothetical protein MGC16121 (MGC16121), mRNA.                                                                                                        |
| 4023929 | 4023907 | 137620832 | 137620857 | X | - | NM_004114    | FGF13     | Fibroblast growth factor 13                                                                                                                                                    |
| 4024320 | 4024310 | 139414600 | 139414646 | X | - | NM_005634    | SOX3      | SRY (sex determining region Y)-box 3                                                                                                                                           |

|         |         |           |           |   |   |           |         |                                                                                             |
|---------|---------|-----------|-----------|---|---|-----------|---------|---------------------------------------------------------------------------------------------|
| 4026670 | 4026669 | 152619150 | 152619175 | X | - | NM_005745 | BCAP31  | B-cell receptor-associated protein 31                                                       |
| 4033178 | 4033161 | 1465179   | 1465423   | Y | - | NM_001636 | SLC25A6 | Solute carrier family 25 (mitochondrial carrier; adenine nucleotide translocator), member 6 |
| 4033179 | 4033161 | 1465524   | 1465582   | Y | - | NM_001636 | SLC25A6 | Solute carrier family 25 (mitochondrial carrier; adenine nucleotide translocator), member 6 |
| 4035105 | 4035017 | 14100945  | 14100972  | Y | - | BC029389  | UTY     | Ubiquitously transcribed tetratricopeptide repeat gene, Y-linked                            |
| 4035834 | 4035833 | 19611936  | 19612006  | Y | - | NM_013230 | CD24    | CD24 molecule                                                                               |
| 4036514 | 4036497 | 22853285  | 22853312  | Y | - | NR_001541 |         | Homo sapiens testis-specific transcript, Y-linked 5 (TTY5) on chromosome Y.                 |
| 4037584 | 4037583 | 1706      | 2264      | M | + | NC_001807 |         | gi 17981852 ref NC_001807.4 :1673-3230; gene=RNR2; product=l-rRNA                           |
| 4037585 | 4037583 | 2548      | 2614      | M | + | NC_001807 |         | gi 17981852 ref NC_001807.4 :1673-3230; gene=RNR2; product=l-rRNA                           |
| 4037587 | 4037583 | 2660      | 2709      | M | + | NC_001807 |         | gi 17981852 ref NC_001807.4 :1673-3230; gene=RNR2; product=l-rRNA                           |
| 4037588 | 4037583 | 2745      | 2804      | M | + | NC_001807 |         | gi 17981852 ref NC_001807.4 :1673-3230; gene=RNR2; product=l-rRNA                           |
| 4037589 | 4037583 | 2829      | 2953      | M | + | NC_001807 |         | gi 17981852 ref NC_001807.4 :1673-3230; gene=RNR2; product=l-rRNA                           |
| 4037590 | 4037583 | 3074      | 3156      | M | + | NC_001807 |         | gi 17981852 ref NC_001807.4 :1673-3230; gene=RNR2; product=l-rRNA                           |
| 4037596 | 4037595 | 3308      | 3400      | M | + | NC_001807 |         | NADH dehydrogenase subunit 1, Mitochondrion [Homo sapiens]                                  |
| 4037597 | 4037595 | 3423      | 3567      | M | + | NC_001807 |         | NADH dehydrogenase subunit 1, Mitochondrion [Homo sapiens]                                  |
| 4037598 | 4037595 | 3636      | 3937      | M | + | NC_001807 |         | NADH dehydrogenase subunit 1, Mitochondrion [Homo sapiens]                                  |
| 4037599 | 4037595 | 3982      | 4168      | M | + | NC_001807 |         | NADH dehydrogenase subunit 1, Mitochondrion [Homo sapiens]                                  |

|         |         |      |      |   |   |           |                                                                               |
|---------|---------|------|------|---|---|-----------|-------------------------------------------------------------------------------|
| 4037600 | 4037595 | 4190 | 4215 | M | + | NC_001807 | NADH dehydrogenase subunit 1, Mitochondrion [Homo sapiens]                    |
| 4037601 | 4037595 | 4218 | 4252 | M | + | NC_001807 | NADH dehydrogenase subunit 1, Mitochondrion [Homo sapiens]                    |
| 4037609 | 4037608 | 4511 | 4660 | M | + | NC_001807 | NADH dehydrogenase subunit 2, Mitochondrion [Homo sapiens]                    |
| 4037610 | 4037608 | 5184 | 5220 | M | + | NC_001807 | NADH dehydrogenase subunit 2, Mitochondrion [Homo sapiens]                    |
| 4037611 | 4037608 | 5244 | 5348 | M | + | NC_001807 | NADH dehydrogenase subunit 2, Mitochondrion [Homo sapiens]                    |
| 4037624 | 4037623 | 5966 | 6212 | M | + | CR608441  | full-length cDNA clone CS0DF003YI04 of Fetal brain of Homo sapiens (human).   |
| 4037625 | 4037623 | 6514 | 6539 | M | + | CR608441  | full-length cDNA clone CS0DF003YI04 of Fetal brain of Homo sapiens (human).   |
| 4037626 | 4037623 | 6599 | 6885 | M | + | CR608441  | full-length cDNA clone CS0DF003YI04 of Fetal brain of Homo sapiens (human).   |
| 4037627 | 4037623 | 6942 | 7400 | M | + | CR608441  | full-length cDNA clone CS0DF003YI04 of Fetal brain of Homo sapiens (human).   |
| 4037628 | 4037623 | 7413 | 7444 | M | + | CR608441  | full-length cDNA clone CS0DF003YI04 of Fetal brain of Homo sapiens (human).   |
| 4037629 | 4037623 | 7472 | 7516 | M | + | CR608441  | full-length cDNA clone CS0DF003YI04 of Fetal brain of Homo sapiens (human).   |
| 4037633 | 4037632 | 7744 | 7949 | M | + | AB019563  | Homo sapiens mRNA expressed only in placental villi, clone SMAP42.            |
| 4037634 | 4037632 | 7988 | 8021 | M | + | Y17175    | Homo sapiens mRNA from HIV-associated non-Hodgkin's lymphoma (clone hl2-274). |

|         |         |       |       |   |   |                 |                                                                                                             |
|---------|---------|-------|-------|---|---|-----------------|-------------------------------------------------------------------------------------------------------------|
| 4037635 | 4037632 | 8159  | 8228  | M | + | ENST00000361739 | Homo sapiens cytochrome c oxidase II (MTCO2), mRNA.<br>gene:ENSG00000198712                                 |
| 4037640 | 4037638 | 8529  | 8561  | M | + | NC_001807       | ATP synthase F0 subunit 6, Mitochondrion [Homo sapiens]                                                     |
| 4037641 | 4037638 | 8720  | 8908  | M | + | NC_001807       | ATP synthase F0 subunit 6, Mitochondrion [Homo sapiens]                                                     |
| 4037642 | 4037638 | 9035  | 9154  | M | + | NC_001807       | ATP synthase F0 subunit 6, Mitochondrion [Homo sapiens]                                                     |
| 4037644 | 4037638 | 9287  | 9462  | M | + | CR625031        | full-length cDNA clone CS0DL009YD04 of B cells (Ramos cell line) Cot 25-normalized of Homo sapiens (human). |
| 4037645 | 4037638 | 9609  | 9652  | M | + | CR625031        | full-length cDNA clone CS0DL009YD04 of B cells (Ramos cell line) Cot 25-normalized of Homo sapiens (human). |
| 4037646 | 4037638 | 9669  | 9724  | M | + | CR625031        | full-length cDNA clone CS0DL009YD04 of B cells (Ramos cell line) Cot 25-normalized of Homo sapiens (human). |
| 4037647 | 4037638 | 9751  | 9793  | M | + | AB064665        | Homo sapiens mRNA for OK                                                                                    |
| 4037648 | 4037638 | 9888  | 9921  | M | + | AB064665        | Homo sapiens mRNA for OK                                                                                    |
| 4037649 | 4037638 | 9937  | 9979  | M | + | AB064665        | Homo sapiens mRNA for OK                                                                                    |
| 4037653 | 4037652 | 10168 | 10380 | M | + | NC_001807       | NADH dehydrogenase subunit 3, Mitochondrion [Homo sapiens]                                                  |
| 4037659 | 4037656 | 10954 | 11142 | M | + | CR623376        | full-length cDNA clone CS0CAP006YJ04 of Thymus of Homo sapiens (human).                                     |
| 4037660 | 4037656 | 11274 | 11415 | M | + | CR602722        | full-length cDNA clone CS0DI085YA08 of Placenta Cot 25-normalized of Homo sapiens (human).                  |
| 4037661 | 4037656 | 11995 | 12024 | M | + | CR602722        | full-length cDNA clone CS0DI085YA08 of Placenta Cot 25-normalized of Homo sapiens (human).                  |
| 4037662 | 4037656 | 12104 | 12137 | M | + | CR602722        | full-length cDNA clone CS0DI085YA08 of Placenta Cot 25-normalized of Homo sapiens (human).                  |

|         |         |           |           |   |    |          |                 |                                                                                                                            |                                                                                             |
|---------|---------|-----------|-----------|---|----|----------|-----------------|----------------------------------------------------------------------------------------------------------------------------|---------------------------------------------------------------------------------------------|
| 4037670 | 4037669 | 12749     | 12900     | M | +  | AF339086 |                 | Homo sapiens NADH dehydrogenase subunit 5 (MTND5) mRNA, RNA 4, complete cds; mitochondrial gene for mitochondrial product. |                                                                                             |
| 4037671 | 4037669 | 13466     | 13491     | M | +  | AF339086 |                 | Homo sapiens NADH dehydrogenase subunit 5 (MTND5) mRNA, RNA 4, complete cds; mitochondrial gene for mitochondrial product. |                                                                                             |
| 4037673 | 4037669 | 13958     | 14089     | M | +  | AF339086 |                 | Homo sapiens NADH dehydrogenase subunit 5 (MTND5) mRNA, RNA 4, complete cds; mitochondrial gene for mitochondrial product. |                                                                                             |
| 4040071 | 4040063 | 1243624   | 1243866   |   | 17 | +        | NM_002984       | CCL4                                                                                                                       | Chemokine (C-C motif) ligand 4                                                              |
| 4040480 | 4040452 | 2329837   | 2329863   |   | 17 | +        | NM_000160       | GCGR                                                                                                                       | Glucagon receptor                                                                           |
| 4041344 | 4041342 | 2360361   | 2360389   |   | 17 | -        | NM_000918       | P4HB                                                                                                                       | Procollagen-proline, 2-oxoglutarate 4-dioxygenase (proline 4-hydroxylase), beta polypeptide |
| 4041978 | 4041961 | 386124    | 386155    |   | 1  | +        | NM_017900       | CCNL2                                                                                                                      | Cyclin L2                                                                                   |
| 4045473 | 4045426 | 221604089 | 221604122 |   | 1  | -        | ENST00000271787 |                                                                                                                            | cdna:known<br>chromosome:NCBI36:1:221463271:221604143:-1 gene:ENSG00000143502               |
| 4045599 | 4045598 | 151782743 | 151782816 |   | 1  | -        | NM_019554       | S100A4                                                                                                                     | S100 calcium binding protein A4                                                             |
| 4045666 | 4045665 | 151853397 | 151853848 |   | 1  | -        | NM_020672       | S100A14                                                                                                                    | S100 calcium binding protein A14                                                            |
| 4050501 | 4050485 | 139256770 | 139256848 |   | 9  | +        | NM_006088       | TUBB2C                                                                                                                     | Tubulin, beta 2C                                                                            |
