# Supplementary material
Source: PubMed Central journal article supplement (PMC2799536)
Supplement: NIHMS103534-supplement-e.pdf [file NIHMS103534-supplement-e.pdf]

| Category      | Term                                           | Count | Genes                                                                                                                                                                                                                                                                                                                                                                                                                                                                                                                                                                                                                                                                          |
|---------------|------------------------------------------------|-------|--------------------------------------------------------------------------------------------------------------------------------------------------------------------------------------------------------------------------------------------------------------------------------------------------------------------------------------------------------------------------------------------------------------------------------------------------------------------------------------------------------------------------------------------------------------------------------------------------------------------------------------------------------------------------------|
| GOTERM_MF_ALL | aa3-type cytochrome c oxidase                  | 5     | NM_004074, NM_004374, NM_004255, NM_001863, NM_001865,                                                                                                                                                                                                                                                                                                                                                                                                                                                                                                                                                                                                                         |
| GOTERM_MF_ALL | actin binding                                  | 24    | NM_005507, NM_003290, NM_002298, NM_004368, NM_021109, NM_183049, NM_004877, NM_007285, NM_012090, NM_006135, NM_003370, NM_000256, NM_006646, NM_004924, NM_153649, NM_138632, NM_001002857, NM_002652, NM_014548, NM_017771, NM_006457, NM_012334, NM_021103, NM_002356, NM_005720, NM_001101, NM_001614, NM_006135, NM_003370, NM_000256, NM_005731, NM_152862, NM_006646, NM_004389, NM_004924, NM_153649, NM_138632, NM_021019, NM_079423, NM_014548, NM_012334, NM_033546, NM_005721, NM_002356,                                                                                                                                                                         |
| GOTERM_CC_ALL | actin cytoskeleton                             | 17    | NM_005507, NM_004368, NM_198829, NM_005206, NM_001175, NM_001511, NM_006135, NM_005731, NM_152862, NM_002314, NM_006646, NM_001664, NM_004924, NM_138632, NM_181335,                                                                                                                                                                                                                                                                                                                                                                                                                                                                                                           |
| GOTERM_BP_ALL | actin cytoskeleton organization and biogenesis | 14    | NM_005507, NM_004368, NM_198829, NM_005206, NM_001175, NM_001511, NM_006135, NM_005731, NM_152862, NM_002314, NM_006646, NM_001664, NM_004924, NM_138632, NM_181335,                                                                                                                                                                                                                                                                                                                                                                                                                                                                                                           |
| GOTERM_BP_ALL | actin filament-based process                   | 14    | NM_005507, NM_004368, NM_198829, NM_005206, NM_001175, NM_001511, NM_006135, NM_005731, NM_152862, NM_002314, NM_006646, NM_001664, NM_004924, NM_138632, NM_181335,                                                                                                                                                                                                                                                                                                                                                                                                                                                                                                           |
| GOTERM_BP_ALL | actin polymerization and/or depolymerization   | 5     | NM_006646, NM_198829, NM_138632, NM_006135, NM_005731, NM_152862,                                                                                                                                                                                                                                                                                                                                                                                                                                                                                                                                                                                                              |
| GOTERM_MF_ALL | adenyl nucleotide binding                      | 58    | NM_003576, NM_031844, NM_033141, NM_173176, NM_005347, NM_001686, NM_001005273, NM_032409, NM_002953, NM_002567, NM_007317, NM_006282, NM_003987, NM_025150, NM_012393, NM_201533, NM_002969, NM_153292, NM_006597, NM_013233, NM_001261, NM_138813, NM_001357, NM_006254, NM_001001937, NM_001068, NM_012334, NM_005721, NM_212472, NM_014861, NM_002747, NM_148977, NM_139062, NM_001101, NM_001614, NM_007285, NM_024045, NM_014370, NM_003718, NM_001693, NM_003656, NM_002512, NM_005923, NM_000702, NM_004566, NM_000352, NM_005044, NM_015076, NM_004333, NM_001271, NM_007355, NM_002314, NM_000291, NM_005345, NM_017771, NM_003777, NM_030919, NM_001967, NM_014496, |
| GOTERM_BP_ALL | alcohol catabolism                             | 6     | NM_006755, NM_000365, NM_000291, NM_002046, NM_184041, NM_005566, NM_004174, NM_032591, NM_000238, NM_005714, NM_001014797, NM_005072,                                                                                                                                                                                                                                                                                                                                                                                                                                                                                                                                         |
| GOTERM_MF_ALL | alkali metal ion binding                       | 10    | NM_152868, NM_000702, NM_004976, NM_004519, NM_001288, NM_001005611, NM_033323, NM_033223, NM_005072, NM_001853,                                                                                                                                                                                                                                                                                                                                                                                                                                                                                                                                                               |
| GOTERM_BP_ALL | anion transport                                | 10    | NM_152888, NM_002635, NM_000093, NM_004366, NM_007308, NM_005507, NM_004323, NM_005345, NM_000700, NM_003295,                                                                                                                                                                                                                                                                                                                                                                                                                                                                                                                                                                  |
| GOTERM_BP_ALL | anti-apoptosis                                 | 10    | NM_003897, NM_004333, NM_005347, NM_021960,                                                                                                                                                                                                                                                                                                                                                                                                                                                                                                                                                                                                                                    |

|               |                                                    |    |                                                                                                                                                                                                                                                                                                                                                                                                                                                                                                                                                                                                                                                                     |
|---------------|----------------------------------------------------|----|---------------------------------------------------------------------------------------------------------------------------------------------------------------------------------------------------------------------------------------------------------------------------------------------------------------------------------------------------------------------------------------------------------------------------------------------------------------------------------------------------------------------------------------------------------------------------------------------------------------------------------------------------------------------|
| GOTERM_BP_ALL | apoptosis                                          | 32 | NM_007308, NM_003810, NM_003900, NM_005507, NM_000700, NM_173176, NM_015322, NM_005347, NM_021960, NM_000312, NM_201413, NM_020529, NM_012238, NM_014550, NM_002598, NM_006282, NM_005923, NM_001066, NM_003790, NM_015675, NM_003824, NM_004323, NM_001636, NM_003897, NM_004333, NM_005745, NM_000211, NM_005345, NM_000576, NM_003295, NM_006088, NM_018434,                                                                                                                                                                                                                                                                                                     |
| GOTERM_MF_ALL | ATP binding                                        | 57 | NM_003576, NM_031844, NM_033141, NM_173176, NM_005347, NM_001686, NM_001005273, NM_032409, NM_002953, NM_002567, NM_007317, NM_006282, NM_003987, NM_025150, NM_012393, NM_201533, NM_002969, NM_006597, NM_013233, NM_001261, NM_138813, NM_001357, NM_006254, NM_001001937, NM_001068, NM_012334, NM_005721, NM_212472, NM_014861, NM_002747, NM_148977, NM_139062, NM_001101, NM_001614, NM_007285, NM_024045, NM_014370, NM_003718, NM_001693, NM_003656, NM_002512, NM_005923, NM_000702, NM_004566, NM_000352, NM_015076, NM_004333, NM_005044, NM_001271, NM_007355, NM_002314, NM_000291, NM_005345, NM_017771, NM_003777, NM_030919, NM_001967, NM_014496, |
| GOTERM_BP_ALL | ATP biosynthesis                                   | 11 | NM_007100, NM_001694, NM_001001937, NM_006476, NM_001002031, NM_006356, NM_001685, NM_001001977, NM_001686, NM_001002258, NM_001693,                                                                                                                                                                                                                                                                                                                                                                                                                                                                                                                                |
| GOTERM_BP_ALL | ATP metabolism                                     | 11 | NM_007100, NM_001694, NM_001001937, NM_006476, NM_001002031, NM_006356, NM_001685, NM_001001977, NM_001686, NM_001002258, NM_001693,                                                                                                                                                                                                                                                                                                                                                                                                                                                                                                                                |
| GOTERM_BP_ALL | ATP synthesis coupled proton transport             | 11 | NM_007100, NM_001694, NM_001001937, NM_006476, NM_001002031, NM_006356, NM_001685, NM_001001977, NM_001686, NM_001002258, NM_001693,                                                                                                                                                                                                                                                                                                                                                                                                                                                                                                                                |
| GOTERM_MF_ALL | ATPase activity                                    | 22 | NM_007100, NM_014861, NM_006597, NM_006476, NM_006356, NM_024045, NM_000352, NM_001002031, NM_138813, NM_001271, NM_001686, NM_001005273, NM_001693, NM_001357, NM_001694, NM_001001937, NM_001685, NM_003777, NM_001001977, NM_000702, NM_001002258, NM_001967,                                                                                                                                                                                                                                                                                                                                                                                                    |
| GOTERM_MF_ALL | ATPase activity, coupled                           | 22 | NM_007100, NM_014861, NM_006597, NM_006476, NM_006356, NM_024045, NM_000352, NM_001002031, NM_138813, NM_001271, NM_001686, NM_001005273, NM_001693, NM_001357, NM_001694, NM_001001937, NM_001685, NM_003777, NM_001001977, NM_000702, NM_001002258, NM_001967,                                                                                                                                                                                                                                                                                                                                                                                                    |
| GOTERM_MF_ALL | ATPase activity, coupled to movement of substances | 15 | NM_007100, NM_014861, NM_006476, NM_006356, NM_000352, NM_001002031, NM_138813, NM_001686, NM_001693, NM_001694, NM_001001937, NM_001685, NM_001001977, NM_001002258, NM_000702,                                                                                                                                                                                                                                                                                                                                                                                                                                                                                    |

|               |                                                                                       |     |                                                                                                                                                                                                                                                                                                                                                                                                                                                                                                                                                                                                                                                                                                                                                                                                                                                                                                                                                                                                                                                                                                                                                                                                                                                                                                                       |
|---------------|---------------------------------------------------------------------------------------|-----|-----------------------------------------------------------------------------------------------------------------------------------------------------------------------------------------------------------------------------------------------------------------------------------------------------------------------------------------------------------------------------------------------------------------------------------------------------------------------------------------------------------------------------------------------------------------------------------------------------------------------------------------------------------------------------------------------------------------------------------------------------------------------------------------------------------------------------------------------------------------------------------------------------------------------------------------------------------------------------------------------------------------------------------------------------------------------------------------------------------------------------------------------------------------------------------------------------------------------------------------------------------------------------------------------------------------------|
| GOTERM_MF_ALL | ATPase activity, coupled to transmembrane movement of ions                            | 14  | NM_007100, NM_014861, NM_006476, NM_006356, NM_001002031, NM_138813, NM_001686, NM_001693, NM_001694, NM_001001937, NM_001685, NM_001001977, NM_001002258, NM_000702,                                                                                                                                                                                                                                                                                                                                                                                                                                                                                                                                                                                                                                                                                                                                                                                                                                                                                                                                                                                                                                                                                                                                                 |
| GOTERM_MF_ALL | ATPase activity, coupled to transmembrane movement of ions, phosphorylative mechanism | 6   | NM_014861, NM_001694, NM_138813, NM_001686, NM_000702, NM_001693, NM_007100, NM_014861, NM_006476, NM_006356, NM_000352, NM_001002031, NM_138813, NM_001686, NM_001693, NM_001694, NM_001001937, NM_001685, NM_001001977, NM_001002258, NM_000702,                                                                                                                                                                                                                                                                                                                                                                                                                                                                                                                                                                                                                                                                                                                                                                                                                                                                                                                                                                                                                                                                    |
| GOTERM_MF_ALL | ATPase activity, coupled to transmembrane movement of substances                      | 15  | NM_004074, NM_004374, NM_004255, NM_001863, NM_001865, NM_002029, NM_006489, NM_001005377, NM_001511, NM_000211, NM_020956, NM_002983, NM_002524, NM_006788, NM_002984, NM_207007, NM_002638, NM_000584, NM_001557,                                                                                                                                                                                                                                                                                                                                                                                                                                                                                                                                                                                                                                                                                                                                                                                                                                                                                                                                                                                                                                                                                                   |
| GOTERM_MF_ALL | ba3-type cytochrome c oxidase                                                         | 5   | NM_170320, NM_001007555, NM_032240, NM_021100, NM_017420, NM_005100, NM_001005273, NM_012318, NM_002013, NM_145699, NM_203374, NM_020956, NM_003908, NM_002984, NM_207007, NM_007317, NM_005072, NM_002872, NM_002356, NM_005474, NM_000424, NM_002272, NM_022486, NM_013233, NM_001064, NM_152831, NM_152868, NM_138813, NM_004519, NM_006397, NM_182706, NM_005858, NM_004227, NM_032251, NM_012482, NM_212472, NM_003290, NM_017722, NM_001101, NM_001614, NM_002146, NM_177949, NM_018282, NM_006304, NM_005968, NM_001014797, NM_033223, NM_145046, NM_003245, NM_001015052, NM_000998, NM_005500, NM_003656, NM_006305, NM_183040, NM_013293, NM_020548, NM_005341, NM_001037663, NM_194447, NM_003428, NM_005986, NM_030613, NM_001085, NM_021130, NM_138769, NM_020530, NM_002652, NM_052978, NM_000996, NM_001015, NM_002691, NM_001002258, NM_018942, NM_001010850, NM_017900, NM_198829, NM_020183, NM_001024226, NM_003487, NM_001004, NM_001686, NM_002966, NM_025264, NM_205840, NM_032188, NM_003247, NM_006058, NM_006270, NM_002968, NM_032876, NM_003025, NM_003753, NM_000970, NM_001024662, NM_033267, NM_004633, NM_207414, NM_021103, NM_005484, NM_002298, NM_153292, NM_012478, NM_006135, NM_003169, NM_002635, NM_001795, NM_001357, NM_021074, NM_006497, NM_001664, NM_012334, NM_207303, |
| GOTERM_BP_ALL | behavior                                                                              | 13  |                                                                                                                                                                                                                                                                                                                                                                                                                                                                                                                                                                                                                                                                                                                                                                                                                                                                                                                                                                                                                                                                                                                                                                                                                                                                                                                       |
| GOTERM_MF_ALL | binding                                                                               | 503 | NM_000526, NM_006076, NM_001010850, NM_021046, NM_000421, NM_145699, NM_001007524, NM_004894, NM_001623, NM_004847, NM_201998, NM_004767, NM_002723, NM_014329, NM_002298, NM_015710, NM_001997, NM_006930, NM_006472, NM_016399, NM_032012, NM_012090, NM_012478, NM_006010, NM_021029, NM_003453, NM_002959, NM_003021, NM_002652, NM_003378, NM_025241, NM_170770, NM_004069,                                                                                                                                                                                                                                                                                                                                                                                                                                                                                                                                                                                                                                                                                                                                                                                                                                                                                                                                      |
| GOTERM_BP_ALL | biological process unknown                                                            | 32  |                                                                                                                                                                                                                                                                                                                                                                                                                                                                                                                                                                                                                                                                                                                                                                                                                                                                                                                                                                                                                                                                                                                                                                                                                                                                                                                       |

|               |                                        |     |                                                                                                                                                                                                                                                                                                                                                                                                                                                                                                                                                                                                                                                                                                                                                                                                                                                                                                                                                                                                                                                                                                                                                                                                                                                                                                            |
|---------------|----------------------------------------|-----|------------------------------------------------------------------------------------------------------------------------------------------------------------------------------------------------------------------------------------------------------------------------------------------------------------------------------------------------------------------------------------------------------------------------------------------------------------------------------------------------------------------------------------------------------------------------------------------------------------------------------------------------------------------------------------------------------------------------------------------------------------------------------------------------------------------------------------------------------------------------------------------------------------------------------------------------------------------------------------------------------------------------------------------------------------------------------------------------------------------------------------------------------------------------------------------------------------------------------------------------------------------------------------------------------------|
|               |                                        |     | XM_371855, NM_000565, NM_001025, NM_000470, XM_327105, NM_000999, NM_001404, NM_001033056, NM_002065, NM_001028, NM_001025071, NM_005617, NM_001694, NM_000972, NM_003908, NM_170738, NM_003987, NM_017629, NM_025150, NM_007100, XM_372048, NM_001006, NM_000985, NM_001032, NM_001026, NM_001997, XM_371019, NM_000978, NM_000975, NM_181864, NM_000989, NM_001001937, NM_004152, NM_007104, NM_000981, NM_001012, NM_002954, NM_002948, NM_001002031, NM_000983, NM_001693, NM_002585, NM_138706, NM_000786, NM_000998, NM_000969, XM_015717, NM_001685, NM_018973, NM_014445, XM_293412, NM_000988, NM_001002, NM_001114, NM_000971, NM_033625, NM_001022, NM_000984, NM_001017, NM_002952, NM_001037663, NM_021029, NM_001009, NM_000994, XM_370611, NM_001402, NM_007355, NM_002970, NM_013234, NM_001005, NM_020244, NM_003896, NM_000996, NM_001015, NM_001025, NM_000976, NM_001002258, NM_005746, NM_001014, NM_001000, NM_001004, NM_001012321, NM_001007, NM_001686, NM_024996, NM_015414, NM_006058, NM_002568, NM_004807, NM_003753, NM_000970, NM_001024662, NM_001033853, XM_371023, NM_014180, NM_000973, NM_012393, XM_208185, NM_153292, NM_184041, NM_033251, NM_022551, NM_006356, NM_003333, NM_016219, NM_001011, NM_025072, NM_001031, NM_001001, XM_496442, NM_000986, NM_000980, |
| GOTERM_BP_ALL | biosynthesis                           | 132 |                                                                                                                                                                                                                                                                                                                                                                                                                                                                                                                                                                                                                                                                                                                                                                                                                                                                                                                                                                                                                                                                                                                                                                                                                                                                                                            |
| GOTERM_BP_ALL | blood vessel development               | 5   | NM_006291, NM_031917, NM_014780, NM_000584, NM_005560,                                                                                                                                                                                                                                                                                                                                                                                                                                                                                                                                                                                                                                                                                                                                                                                                                                                                                                                                                                                                                                                                                                                                                                                                                                                     |
| GOTERM_BP_ALL | blood vessel morphogenesis             | 5   | NM_006291, NM_031917, NM_014780, NM_000584, NM_005560,                                                                                                                                                                                                                                                                                                                                                                                                                                                                                                                                                                                                                                                                                                                                                                                                                                                                                                                                                                                                                                                                                                                                                                                                                                                     |
| GOTERM_MF_ALL | caa3-type cytochrome c oxidase         | 5   | NM_004074, NM_004374, NM_004255, NM_001863, NM_001865,                                                                                                                                                                                                                                                                                                                                                                                                                                                                                                                                                                                                                                                                                                                                                                                                                                                                                                                                                                                                                                                                                                                                                                                                                                                     |
|               |                                        |     | NM_014861, NM_005932, NM_006384, NM_032246, NM_000700, NM_005620, NM_001014797, NM_005347, NM_005487, NM_005184, NM_002966, NM_145046, NM_003245, NM_016190, NM_012318, NM_000312, NM_003247, NM_001623, NM_004847, NM_001002857, NM_019554, NM_033546, NM_022087, NM_020860, NM_002298, NM_002965, NM_153292, NM_022486, NM_001064, NM_012090, NM_023035, NM_001795, NM_001031717, NM_016219, NM_024329, NM_020672, NM_004924, NM_003295, NM_002664, NM_138769, NM_015055, NM_021019, NM_079423, NM_005245, NM_002964,                                                                                                                                                                                                                                                                                                                                                                                                                                                                                                                                                                                                                                                                                                                                                                                    |
| GOTERM_MF_ALL | calcium ion binding                    | 43  |                                                                                                                                                                                                                                                                                                                                                                                                                                                                                                                                                                                                                                                                                                                                                                                                                                                                                                                                                                                                                                                                                                                                                                                                                                                                                                            |
|               |                                        |     | NM_023009, NM_004368, NM_153292, NM_032246, NM_003656, NM_002923, NM_002356,                                                                                                                                                                                                                                                                                                                                                                                                                                                                                                                                                                                                                                                                                                                                                                                                                                                                                                                                                                                                                                                                                                                                                                                                                               |
| GOTERM_MF_ALL | calmodulin binding                     | 7   |                                                                                                                                                                                                                                                                                                                                                                                                                                                                                                                                                                                                                                                                                                                                                                                                                                                                                                                                                                                                                                                                                                                                                                                                                                                                                                            |
|               |                                        |     | NM_002747, NM_003576, NM_002969, NM_013233, NM_001261, NM_014370, NM_005044, NM_032409, NM_002314, NM_002953, NM_006282, NM_014496, NM_212472,                                                                                                                                                                                                                                                                                                                                                                                                                                                                                                                                                                                                                                                                                                                                                                                                                                                                                                                                                                                                                                                                                                                                                             |
| GOTERM_MF_ALL | cAMP-dependent protein kinase activity | 13  |                                                                                                                                                                                                                                                                                                                                                                                                                                                                                                                                                                                                                                                                                                                                                                                                                                                                                                                                                                                                                                                                                                                                                                                                                                                                                                            |

|               |                                     |    |                                                                                                                                                                                                                                                                                                                                                                                                                                                                                                                    |
|---------------|-------------------------------------|----|--------------------------------------------------------------------------------------------------------------------------------------------------------------------------------------------------------------------------------------------------------------------------------------------------------------------------------------------------------------------------------------------------------------------------------------------------------------------------------------------------------------------|
| GOTERM_MF_ALL | carrier activity                    | 39 | NM_004074, NM_014861, NM_004549, NM_006294, NM_006476, NM_033323, NM_001002031, NM_004255, NM_001686, NM_001863, NM_001693, NM_152313, NM_001865, NM_019849, NM_002491, NM_001694, NM_005072, NM_001685, NM_001001977, NM_000702, NM_007100, NM_138454, NM_001636, NM_004374, NM_145283, NM_006356, NM_014402, NM_002635, NM_138813, NM_021074, NM_004174, NM_032591, NM_002489, NM_001001937, NM_004541, NM_000126, NM_005858, NM_001002258, NM_030777,                                                           |
| GOTERM_BP_ALL | cation transport                    | 33 | NM_014861, NM_006476, NM_001014797, NM_001002031, NM_001686, NM_178867, NM_001693, NM_002032, NM_001694, NM_005072, NM_001685, NM_000146, NM_001001977, NM_000702, NM_007100, NM_000352, NM_006356, NM_023035, NM_152868, NM_138813, NM_004976, NM_004519, NM_001426, NM_004174, NM_001288, NM_032591, NM_000238, NM_016321, NM_001001937, NM_005714, NM_015353, NM_032513, NM_001002258,                                                                                                                          |
| GOTERM_MF_ALL | cation transporter activity         | 44 | NM_004074, NM_014861, NM_004549, NM_006294, NM_033323, NM_006476, NM_001002031, NM_001014797, NM_004255, NM_001686, NM_001863, NM_178867, NM_001693, NM_001865, NM_002491, NM_001694, NM_005072, NM_001685, NM_001001977, NM_000702, NM_007100, NM_004374, NM_023035, NM_006356, NM_000352, NM_152868, NM_014402, NM_138813, NM_004976, NM_004519, NM_001426, NM_021074, NM_004174, NM_001288, NM_032591, NM_000238, NM_016321, NM_002489, NM_005714, NM_001001937, NM_004541, NM_015353, NM_032513, NM_001002258, |
| GOTERM_MF_ALL | cation-transporting ATPase activity | 12 | NM_007100, NM_014861, NM_001694, NM_001001937, NM_006476, NM_001002031, NM_006356, NM_001685, NM_001001977, NM_001686, NM_001002258, NM_001693,                                                                                                                                                                                                                                                                                                                                                                    |
| GOTERM_MF_ALL | cbb3-type cytochrome c oxidase      | 5  | NM_004074, NM_004374, NM_004255, NM_001863, NM_001865,                                                                                                                                                                                                                                                                                                                                                                                                                                                             |

|               |                   |     |                                                                                                                                                                                                                                                                                                                                                                                                                                                                                                                                                                                                                                                                                                                                                                                                                                                                                                                                                                                                                                                                                                                                                                                                                                                                                                                   |
|---------------|-------------------|-----|-------------------------------------------------------------------------------------------------------------------------------------------------------------------------------------------------------------------------------------------------------------------------------------------------------------------------------------------------------------------------------------------------------------------------------------------------------------------------------------------------------------------------------------------------------------------------------------------------------------------------------------------------------------------------------------------------------------------------------------------------------------------------------------------------------------------------------------------------------------------------------------------------------------------------------------------------------------------------------------------------------------------------------------------------------------------------------------------------------------------------------------------------------------------------------------------------------------------------------------------------------------------------------------------------------------------|
| GOTERM_CC_ALL | cell              | 599 | <p>NM_000552, NM_002755, NM_178520, NM_052240, NM_021100, NM_017420, NM_003108, NM_001005273, NM_000999, NM_152313, NM_012318, NM_002013, NM_203374, NM_020956, NM_003908, NM_007317, NM_005072, NM_152414, NM_002356, NM_005474, XM_372048, NM_000424, NM_002272, NM_001032, NM_013233, NM_152831, NM_024700, NM_152888, NM_152868, NM_138813, NM_004519, NM_006263, NM_182706, NM_019084, NM_007104, NM_013230, NM_005858, NM_004227, NM_012482, NM_212472, NM_003290, NM_003125, NM_016604, NM_001101, NM_001614, NM_002146, NM_177949, NM_006304, NM_005968, NM_001014797, NM_033223, NM_145046, NM_003245, NM_001015052, NM_018694, NM_019849, NM_006617, NM_000998, NM_005500, NM_003656, NM_006305, NM_183040, NM_013293, XM_293412, NM_000988, NM_016127, NM_032947, NM_005341, NM_001037663, NM_194447, NM_021029, NM_003332, NM_000994, NM_003428, NM_005986, NM_030613, NM_001085, NM_004541, NM_021130, NM_052978, NM_000996, NM_001015, NM_002691, NM_001004333, NM_001002258, NM_018942, NM_001010850, NM_017900, NM_198829, NM_020183, NM_001024226, NM_003487, NM_000421, NM_001004, NM_001686, NM_015335, NM_015414, NM_025264, NM_205840, NM_032188, NM_006270, NM_002968, NM_006058, NM_003753, NM_003025, NM_000970, NM_001024662, NM_033267, NM_004633, NM_021103, NM_005484, NM_004366,</p> |
| GOTERM_BP_ALL | cell cycle        | 38  | <p>NM_002747, NM_017900, NM_212492, NM_001101, NM_001614, NM_014781, NM_003718, NM_020357, NM_001623, NM_004847, NM_001800, NM_020238, NM_001665, NM_007317, NM_002512, NM_002823, NM_005072, NM_014780, NM_018171, NM_005474, NM_003641, NM_002969, NM_006930, NM_015714, NM_012090, NM_005938, NM_001261, NM_002710, NM_003169, NM_019001, NM_003333, NM_006497, NM_000576, NM_022118, NM_002524, NM_019084, NM_005858, NM_000584, NM_002923, NM_022117,</p>                                                                                                                                                                                                                                                                                                                                                                                                                                                                                                                                                                                                                                                                                                                                                                                                                                                    |
| GOTERM_BP_ALL | cell cycle arrest | 6   | <p>NM_002969, NM_001623, NM_004847, NM_001800, NM_012090, NM_005938, NM_000584,</p>                                                                                                                                                                                                                                                                                                                                                                                                                                                                                                                                                                                                                                                                                                                                                                                                                                                                                                                                                                                                                                                                                                                                                                                                                               |
| GOTERM_BP_ALL | cell death        | 33  | <p>NM_007308, NM_005507, NM_003810, NM_003900, NM_000700, NM_173176, NM_015322, NM_005347, NM_021960, NM_000312, NM_201413, NM_020529, NM_012238, NM_014550, NM_002598, NM_006282, NM_005923, NM_001066, NM_003790, NM_015675, NM_003824, NM_004323, NM_001636, NM_003897, NM_023035, NM_004333, NM_005745, NM_000211, NM_005345, NM_000576, NM_003295, NM_006088, NM_018434,</p>                                                                                                                                                                                                                                                                                                                                                                                                                                                                                                                                                                                                                                                                                                                                                                                                                                                                                                                                 |

|               |                      |    |                                                                                                                                                                                                                                                                                                                                                                                                                                                                                   |
|---------------|----------------------|----|-----------------------------------------------------------------------------------------------------------------------------------------------------------------------------------------------------------------------------------------------------------------------------------------------------------------------------------------------------------------------------------------------------------------------------------------------------------------------------------|
| GOTERM_BP_ALL | cell differentiation | 34 | NM_003900, NM_032108, NM_003125, NM_031917, NM_006181, NM_003245, NM_201535, NM_021960, NM_205840, NM_002585, NM_001024, NM_006096, NM_020956, NM_012238, NM_005987, NM_005988, NM_003656, NM_006291, NM_014780, NM_003987, NM_005474, NM_000424, NM_002272, NM_015675, NM_002969, NM_001022, NM_002705, NM_001005611, NM_178439, NM_001017418, NM_006945, NM_002581, NM_003333, NM_002959, NM_005560, NM_005416,                                                                 |
| GOTERM_CC_ALL | cell fraction        | 41 | NM_003810, NM_004549, NM_015256, NM_181642, NM_005968, NM_001002031, NM_004781, NM_001304, NM_206887, NM_002835, NM_000433, NM_002983, NM_002827, NM_001002857, NM_005729, NM_003458, NM_005072, NM_001685, NM_004366, NM_001005611, NM_152831, NM_152868, NM_001795, NM_004976, NM_021999, NM_014723, NM_004519, NM_016219, NM_021074, NM_001288, NM_020244, NM_000238, NM_005714, NM_014300, NM_001001937, NM_004541, NM_006457, NM_000584, NM_004227, NM_001002258, NM_003761, |
| GOTERM_BP_ALL | cell homeostasis     | 9  | NM_002032, NM_201413, NM_002983, NM_025072, NM_023035, NM_005072, NM_000146, NM_000702, NM_021960,                                                                                                                                                                                                                                                                                                                                                                                |
| GOTERM_BP_ALL | cell ion homeostasis | 7  | NM_002032, NM_201413, NM_002983, NM_023035, NM_005072, NM_000146, NM_000702,                                                                                                                                                                                                                                                                                                                                                                                                      |
| GOTERM_BP_ALL | cell migration       | 6  | NM_181335, NM_006181, NM_000584, NM_005560, NM_000211, NM_003333,                                                                                                                                                                                                                                                                                                                                                                                                                 |
| GOTERM_BP_ALL | cell motility        | 27 | NM_005720, NM_000700, NM_005206, NM_001101, NM_001614, NM_001005377, NM_001175, NM_006181, NM_002983, NM_002984, NM_207007, NM_181335, NM_000702, NM_002356, NM_002029, NM_006135, NM_003370, NM_003333, NM_000211, NM_005731, NM_152862, NM_002314, NM_004924, NM_002524, NM_003777, NM_003329, NM_001557, NM_000584, NM_005560, NM_005721,                                                                                                                                      |

|               |                                  |    |                                                                                                                                                                                                                                                                                                                                                                                                                                                                                                                                                                                                                                                                                                                                                                                                                                                                                                                                                                                                                                                         |
|---------------|----------------------------------|----|---------------------------------------------------------------------------------------------------------------------------------------------------------------------------------------------------------------------------------------------------------------------------------------------------------------------------------------------------------------------------------------------------------------------------------------------------------------------------------------------------------------------------------------------------------------------------------------------------------------------------------------------------------------------------------------------------------------------------------------------------------------------------------------------------------------------------------------------------------------------------------------------------------------------------------------------------------------------------------------------------------------------------------------------------------|
|               |                                  |    | NM_005507, NM_032452, NM_021109, NM_198829, NM_006082, NM_001024226, NM_022822, NM_001175, NM_000044, NM_001511, NM_198398, NM_005487, NM_001005273, NM_005131, NM_205840, NM_032188, NM_006646, XM_293312, NM_000972, NM_001017998, NM_007317, NM_002984, NM_207007, NM_181335, NM_002971, NM_003987, NM_021103, NM_005474, NM_000424, NM_002272, NM_004368, NM_001636, NM_199040, NM_014292, NM_006135, NM_003169, NM_000978, NM_003333, NM_005731, NM_152862, NM_002284, NM_001664, NM_002136, NM_001013699, NM_005324, NM_003624, NM_003900, NM_005932, NM_183049, NM_005206, NM_001436, NM_007285, NM_006181, NM_004781, NM_057088, NM_022080, NM_003245, NM_001662, NM_152879, NM_020529, NM_002983, NM_012238, NM_002486, NM_006305, NM_183040, NM_014445, NM_006009, NM_033396, NM_001002, NM_007347, NM_003569, NM_001271, NM_001037494, NM_005745, NM_000211, NM_002959, NM_005986, NM_173086, NM_002314, NM_004924, NM_020244, NM_138632, NM_020530, NM_006088, NM_006357, NM_003777, NM_004069, NM_031431, NM_020649, NM_022117, NM_005560, |
| GOTERM_BP_ALL | cell organization and biogenesis | 88 |                                                                                                                                                                                                                                                                                                                                                                                                                                                                                                                                                                                                                                                                                                                                                                                                                                                                                                                                                                                                                                                         |
| GOTERM_BP_ALL | cell proliferation               | 28 | NM_005746, NM_173176, NM_005620, NM_001511, NM_000044, NM_003718, NM_205840, NM_057091, NM_002032, NM_153232, NM_001623, NM_004847, NM_001800, NM_001665, NM_002512, NM_003288, NM_018171, NM_003641, NM_000424, NM_002272, NM_005938, NM_001261, NM_002357, NM_000576, NM_020530, NM_003329, NM_001557, NM_000584, NM_006763, NM_005560,                                                                                                                                                                                                                                                                                                                                                                                                                                                                                                                                                                                                                                                                                                               |
| GOTERM_CC_ALL | cell surface                     | 7  | NM_004475, NM_201413, NM_006597, NM_001005377, NM_001494, NM_000918, NM_005347,                                                                                                                                                                                                                                                                                                                                                                                                                                                                                                                                                                                                                                                                                                                                                                                                                                                                                                                                                                         |
| GOTERM_BP_ALL | cell-cell signaling              | 26 | NM_003810, NM_005746, NM_006489, NM_007285, NM_001014797, NM_033223, NM_000044, NM_001033056, NM_002065, NM_002983, NM_001405, NM_002984, NM_207007, NM_003458, NM_002965, NM_004114, NM_023035, NM_004519, NM_003333, NM_000211, NM_014723, NM_002341, NM_000576, NM_020530, NM_017771, NM_003329, NM_000584, NM_005245,                                                                                                                                                                                                                                                                                                                                                                                                                                                                                                                                                                                                                                                                                                                               |



|               |                       |     |                                                                                                                                                                                                                                                                                                                                                                                                                                                                                                                                                                                                                                                                                                                                                                                                                                                                                                                                                                                                                                                                                                                                                                                                                                                                                                                              |
|---------------|-----------------------|-----|------------------------------------------------------------------------------------------------------------------------------------------------------------------------------------------------------------------------------------------------------------------------------------------------------------------------------------------------------------------------------------------------------------------------------------------------------------------------------------------------------------------------------------------------------------------------------------------------------------------------------------------------------------------------------------------------------------------------------------------------------------------------------------------------------------------------------------------------------------------------------------------------------------------------------------------------------------------------------------------------------------------------------------------------------------------------------------------------------------------------------------------------------------------------------------------------------------------------------------------------------------------------------------------------------------------------------|
| GOTERM_BP_ALL | cellular biosynthesis | 128 | <p>XM_371855, NM_000565, NM_001025, NM_000470, XM_327105, NM_000999, NM_001404, NM_001033056, NM_002065, NM_001028, NM_001025071, NM_005617, NM_001694, NM_000972, NM_003908, NM_170738, NM_003987, NM_017629, NM_025150, NM_007100, XM_372048, NM_001006, NM_000985, NM_001032, NM_001026, NM_001997, XM_371019, NM_000978, NM_000975, NM_181864, NM_000989, NM_001001937, NM_004152, NM_007104, NM_000981, NM_001012, NM_002954, NM_002948, NM_001002031, NM_000983, NM_001693, NM_002585, NM_138706, NM_000998, NM_000969, XM_015717, NM_001685, NM_018973, NM_014445, XM_293412, NM_000988, NM_001002, NM_001114, NM_000971, NM_033625, NM_001022, NM_000984, NM_001017, NM_002952, NM_001037663, NM_021029, NM_001009, NM_000994, XM_370611, NM_001402, NM_002970, NM_013234, NM_001005, NM_003896, NM_000996, NM_001015, NM_001025, NM_000976, NM_001002258, NM_005746, NM_001014, NM_001000, NM_001004, NM_001012321, NM_001007, NM_001686, NM_024996, NM_015414, NM_006058, NM_002568, NM_004807, NM_003753, NM_000970, NM_001024662, NM_001033853, XM_371023, NM_014180, NM_000973, NM_012393, XM_208185, NM_184041, NM_033251, NM_022551, NM_006356, NM_003333, NM_016219, NM_001011, NM_025072, NM_001031, NM_001001, XM_496442, NM_000986, NM_000980, NM_148977, NM_000992, XM_495839, NM_000661, NM_005801,</p> |
| GOTERM_BP_ALL | cellular localization | 32  | <p>NM_003900, NM_032452, NM_005932, NM_006082, NM_001024226, NM_022822, NM_007285, NM_198398, NM_005487, NM_022080, NM_005131, NM_001662, NM_020529, NM_002486, NM_006305, NM_001017998, NM_007317, NM_006009, NM_001636, NM_199040, NM_007347, NM_003569, NM_005745, NM_000978, NM_002959, NM_001664, NM_006088, NM_003777, NM_004069, NM_002136, NM_031431, NM_003624,</p>                                                                                                                                                                                                                                                                                                                                                                                                                                                                                                                                                                                                                                                                                                                                                                                                                                                                                                                                                 |

|               |                                   |     |                                                                                                                                                                                                                                                                                                                                                                                                                                                                                                                                                                                                                                                                                                                                                                                                                                                                                                                                                                                                                                                                                                                                                                                                                                                                                                                              |
|---------------|-----------------------------------|-----|------------------------------------------------------------------------------------------------------------------------------------------------------------------------------------------------------------------------------------------------------------------------------------------------------------------------------------------------------------------------------------------------------------------------------------------------------------------------------------------------------------------------------------------------------------------------------------------------------------------------------------------------------------------------------------------------------------------------------------------------------------------------------------------------------------------------------------------------------------------------------------------------------------------------------------------------------------------------------------------------------------------------------------------------------------------------------------------------------------------------------------------------------------------------------------------------------------------------------------------------------------------------------------------------------------------------------|
| GOTERM_BP_ALL | cellular macromolecule metabolism | 193 | <p>NM_002755, NM_005376, NM_001023, NM_032240, NM_005959, NM_194460, NM_002013, NM_032409, NM_021009, NM_001028, NM_003908, NM_018320, NM_014780, NM_017629, XM_372048, NM_001032, NM_002969, NM_006597, XM_371019, NM_013233, NM_152831, NM_000975, NM_006254, NM_007104, NM_015133, NM_212472, NM_001005377, NM_006304, NM_005609, NM_000983, NM_145046, NM_003245, NM_000998, NM_005500, NM_003656, NM_018973, NM_005923, XM_293412, NM_000988, NM_033625, NM_001022, NM_018998, NM_001037663, NM_005044, NM_021029, NM_000994, NM_001402, NM_013234, NM_003828, NM_021130, NM_006088, NM_000996, NM_170770, NM_001015, NM_000976, NM_017900, NM_006082, NM_198829, NM_033141, NM_001004, NM_001012321, NM_015414, NM_006646, NM_006058, NM_003753, NM_000970, NM_001024662, NM_001017998, NM_014180, NM_005484, XM_208185, NM_033251, NM_022551, NM_014615, NM_006135, NM_194252, NM_001011, NM_001001, XM_496442, NM_000986, NM_000980, NM_014370, NM_002800, XM_495839, NM_005801, NM_001024, XM_058967, NM_000312, NM_152269, NM_012238, NM_001030009, NM_183421, NM_145897, NM_012235, NM_012423, NM_003973, NM_004333, NM_001020, NM_002314, NM_138632, NM_006357, NM_017771, NM_030919, NM_014496, XM_371853, NM_173176, XM_927103, NM_001404, NM_002835, NM_001025071, NM_005617, NM_002953, NM_002827,</p>       |
| GOTERM_BP_ALL | cellular metabolism               | 375 | <p>NM_002755, NM_005376, NM_005834, NM_032240, NM_001007555, NM_001023, NM_017420, NM_006476, NM_003108, NM_000044, NM_018429, NM_001005273, NM_000999, NM_194460, NM_021009, NM_000636, NM_001024466, NM_032409, NM_002013, NM_001028, NM_001694, NM_016311, NM_178190, NM_003908, NM_018320, NM_014780, NM_152414, NM_021167, NM_017629, NM_005474, XM_372048, NM_001032, NM_002969, NM_006597, XM_371019, NM_013416, NM_013233, NM_152831, NM_145283, NM_006397, NM_014884, NM_000975, NM_006254, NM_007104, NM_032251, NM_015133, NM_012482, NM_212472, NM_001039465, NM_017722, NM_002146, NM_002537, NM_018282, NM_001005377, NM_006304, NM_000983, NM_005609, NM_003245, NM_145046, NM_001015052, NM_032836, NM_001693, NM_018694, NM_002585, NM_000200, NM_003113, NM_000998, NM_005121, NM_005500, NM_003656, NM_013293, NM_018973, NM_005923, XM_293412, NM_000988, NM_005341, NM_033625, NM_001022, NM_018998, NM_005413, NM_005044, NM_001037663, NM_021029, NM_000994, NM_001402, NM_003428, NM_002970, NM_000843, NM_005986, NM_013234, NM_003828, NM_004593, NM_004541, NM_021130, NM_006088, NM_170770, NM_000996, NM_002691, NM_001015, NM_005437, NM_001002258, NM_000976, NM_018942, NM_013286, NM_017900, NM_033141, NM_198829, NM_006082, NM_020183, NM_001004, NM_207395, NM_001012321, NM_001686,</p> |

|               |                                |     |                                                                                                                                                                                                                                                                                                                                                                                                                                                                                                                                                                                                                                                                                                                                                                                                                                                                                                                                                                                                                                                                                                                                                                                                                                                                                                                                                                                                                                                                                   |
|---------------|--------------------------------|-----|-----------------------------------------------------------------------------------------------------------------------------------------------------------------------------------------------------------------------------------------------------------------------------------------------------------------------------------------------------------------------------------------------------------------------------------------------------------------------------------------------------------------------------------------------------------------------------------------------------------------------------------------------------------------------------------------------------------------------------------------------------------------------------------------------------------------------------------------------------------------------------------------------------------------------------------------------------------------------------------------------------------------------------------------------------------------------------------------------------------------------------------------------------------------------------------------------------------------------------------------------------------------------------------------------------------------------------------------------------------------------------------------------------------------------------------------------------------------------------------|
| GOTERM_BP_ALL | cellular physiological process | 516 | <del>NM_002755, NM_178326, NM_001007555, NM_032246, NM_017420, NM_005106,</del><br>NM_001005273, NM_000999, NM_152313, NM_002013, NM_003908, NM_002984,<br>NM_207007, NM_007317, NM_005072, NM_152414, NM_002356, NM_005474,<br>XM_372048, NM_000424, NM_002272, NM_001032, NM_013233, NM_152831,<br>NM_152888, NM_152868, NM_138813, NM_004519, NM_006397, NM_019084,<br>NM_007104, NM_005858, NM_004227, NM_032251, NM_012482, NM_212472,<br>NM_017722, NM_001101, NM_001614, NM_002146, NM_018282, NM_006304,<br>NM_001014797, NM_033223, NM_145046, NM_003245, NM_001015052,<br>NM_018694, NM_019849, NM_000998, NM_005500, NM_003656, NM_006305,<br>NM_183040, NM_013293, XM_293412, NM_000988, NM_020548, NM_005341,<br>NM_018998, NM_001037663, NM_021029, NM_000994, NM_003428, NM_005986,<br>NM_003828, NM_004541, NM_021130, NM_020530, NM_000996, NM_001015,<br>NM_002691, NM_001002258, NM_018942, NM_017900, NM_198829, NM_020183,<br>NM_001024226, NM_001004, NM_001686, NM_015335, NM_015414, NM_025264,<br>NM_205840, NM_032188, NM_006058, NM_002968, NM_003753, NM_000970,<br>NM_001024662, NM_033267, NM_021103, NM_005484, NM_004366, NM_153292,<br>NM_006135, NM_003169, NM_002635, NM_021074, NM_006497, NM_194252,<br>NM_001664, NM_005267, NM_000532, NM_003761, NM_000980, NM_003003,<br>NM_145648, NM_005620, NM_005566, NM_002800, NM_001865, NM_005801,<br><del>NM_002755, NM_178326, NM_001007555, NM_032246, NM_017420, NM_005106,</del>            |
| GOTERM_BP_ALL | cellular process               | 577 | <del>NM_002755, NM_178326, NM_001007555, NM_032246, NM_017420, NM_005106,</del><br>NM_001005273, NM_000999, NM_152313, NM_012318, NM_002013, NM_020956,<br>NM_003908, NM_002984, NM_207007, NM_007317, NM_005072, NM_152414,<br>NM_002872, NM_002356, NM_005474, XM_372048, NM_000424, NM_002272,<br>NM_001032, NM_013233, NM_152831, NM_152888, NM_152868, NM_138813,<br>NM_004519, NM_006397, NM_019084, NM_007104, NM_013230, NM_005858,<br>NM_004227, NM_032251, NM_012482, NM_212472, NM_003125, NM_017722,<br>NM_001101, NM_001614, NM_002146, NM_018282, NM_006304, NM_001014797,<br>NM_033223, NM_145046, NM_003245, NM_001015052, NM_018694, NM_019849,<br>NM_000998, NM_005500, NM_003656, NM_006305, NM_183040, NM_013293,<br>XM_293412, NM_000988, NM_020548, NM_005341, NM_018998, NM_001037663,<br>NM_194447, NM_021029, NM_003332, NM_000994, NM_003428, NM_005986,<br>NM_003828, NM_004541, NM_021130, NM_138769, NM_020530, NM_000996,<br>NM_001015, NM_002691, NM_001002258, NM_018942, NM_017900, NM_198829,<br>NM_020183, NM_001024226, NM_001004, NM_001686, NM_015335, NM_015414,<br>NM_025264, NM_205840, NM_032188, NM_003247, NM_006058, NM_006270,<br>NM_002968, NM_003025, NM_003753, NM_000970, NM_001024662, NM_033267,<br>NM_021103, NM_005484, NM_004366, NM_153292, NM_006135, NM_003169,<br>NM_002635, NM_001795, NM_021074, NM_006497, NM_194252, NM_001664,<br><del>NM_002755, NM_178326, NM_001007555, NM_032246, NM_017420, NM_005106,</del> |

|               |                                    |     |                                                                                                                                                                                                                                                                                                                                                                                                                                                                                                                                                                                                                                                                                                                                                                                                                                                                                                                                                                                                                                                                                                                                                                                                                                                                                                                   |
|---------------|------------------------------------|-----|-------------------------------------------------------------------------------------------------------------------------------------------------------------------------------------------------------------------------------------------------------------------------------------------------------------------------------------------------------------------------------------------------------------------------------------------------------------------------------------------------------------------------------------------------------------------------------------------------------------------------------------------------------------------------------------------------------------------------------------------------------------------------------------------------------------------------------------------------------------------------------------------------------------------------------------------------------------------------------------------------------------------------------------------------------------------------------------------------------------------------------------------------------------------------------------------------------------------------------------------------------------------------------------------------------------------|
|               |                                    |     | NM_002759, XM_371855, NM_005570, NM_052240, NM_001025, NM_175170, XM_927103, NM_000999, NM_001404, NM_194460, NM_021009, NM_032409, NM_002013, NM_001028, NM_002835, NM_002953, NM_001025071, NM_005617, NM_000972, NM_002827, NM_003908, NM_018320, NM_016406, NM_170738, NM_014780, NM_130901, NM_025150, NM_017629, NM_000985, XM_372048, NM_001006, NM_001032, NM_001026, NM_004323, NM_002969, NM_001997, NM_006597, XM_371019, NM_013233, NM_152831, NM_001261, NM_144641, NM_000978, NM_000975, NM_000989, NM_006254, NM_007104, NM_000981, NM_015133, NM_001012, NM_002954, NM_212472, NM_001005377, NM_002948, NM_006304, NM_000983, NM_003245, NM_145046, NM_138706, NM_000998, NM_005500, NM_003656, NM_000969, XM_015717, NM_018973, NM_014445, NM_005923, NM_006009, XM_293412, NM_000988, NM_001002, NM_000971, NM_033625, NM_001022, NM_004877, NM_012158, NM_006930, NM_000984, NM_001017, NM_018998, NM_003347, NM_005044, NM_001037663, NM_002952, NM_021029, NM_001009, XM_370611, NM_002581, NM_000994, NM_001402, NM_007355, NM_013234, NM_001005, NM_003828, NM_003896, NM_021130, NM_006088, NM_170770, NM_000996, NM_000801, NM_001015, NM_001025, NM_000976, NM_017900, NM_001014, NM_033141, NM_198829, NM_006082, NM_001000, NM_001004, NM_001007, NM_001012321, NM_024996, NM_005576, |
| GOTERM_BP_ALL | cellular protein metabolism        | 191 |                                                                                                                                                                                                                                                                                                                                                                                                                                                                                                                                                                                                                                                                                                                                                                                                                                                                                                                                                                                                                                                                                                                                                                                                                                                                                                                   |
| GOTERM_BP_ALL | central nervous system development | 7   | NM_007308, NM_002585, NM_006617, NM_003025, NM_005634, NM_005413, NM_014496,                                                                                                                                                                                                                                                                                                                                                                                                                                                                                                                                                                                                                                                                                                                                                                                                                                                                                                                                                                                                                                                                                                                                                                                                                                      |
| GOTERM_BP_ALL | chemotaxis                         | 10  | NM_002029, NM_002983, NM_002524, NM_006788, NM_001005377, NM_002984, NM_207007, NM_001511, NM_001557, NM_000584, NM_000211,                                                                                                                                                                                                                                                                                                                                                                                                                                                                                                                                                                                                                                                                                                                                                                                                                                                                                                                                                                                                                                                                                                                                                                                       |
| GOTERM_CC_ALL | chromatin                          | 14  | NM_002229, NM_005634, NM_014292, NM_005487, NM_001271, NM_001005273, NM_032188, NM_003113, XM_293312, NM_020238, NM_020649, NM_005324, NM_001013699, NM_033396,                                                                                                                                                                                                                                                                                                                                                                                                                                                                                                                                                                                                                                                                                                                                                                                                                                                                                                                                                                                                                                                                                                                                                   |
| GOTERM_BP_ALL | chromatin assembly                 | 6   | XM_293312, NM_012238, NM_001013699, NM_005324, NM_022117, NM_005474,                                                                                                                                                                                                                                                                                                                                                                                                                                                                                                                                                                                                                                                                                                                                                                                                                                                                                                                                                                                                                                                                                                                                                                                                                                              |
| GOTERM_BP_ALL | chromatin assembly or disassembly  | 11  | NM_032188, XM_293312, NM_012238, NM_014292, NM_001271, NM_001005273, NM_001013699, NM_005324, NM_022117, NM_020649, NM_005474,                                                                                                                                                                                                                                                                                                                                                                                                                                                                                                                                                                                                                                                                                                                                                                                                                                                                                                                                                                                                                                                                                                                                                                                    |
| GOTERM_MF_ALL | chromatin binding                  | 5   | NM_032188, NM_014292, NM_001271, NM_001005273, NM_020649,                                                                                                                                                                                                                                                                                                                                                                                                                                                                                                                                                                                                                                                                                                                                                                                                                                                                                                                                                                                                                                                                                                                                                                                                                                                         |
| GOTERM_BP_ALL | chromatin modification             | 7   | NM_032188, NM_012238, NM_014292, NM_003169, NM_001005273, NM_020649, NM_005474,                                                                                                                                                                                                                                                                                                                                                                                                                                                                                                                                                                                                                                                                                                                                                                                                                                                                                                                                                                                                                                                                                                                                                                                                                                   |
| GOTERM_CC_ALL | chromosome                         | 17  | NM_002229, NM_005634, NM_004729, NM_014292, NM_005487, NM_001271, NM_001005273, NM_032188, NM_003113, XM_293312, NM_020238, NM_007317, NM_001068, NM_001013699, NM_020649, NM_005324, NM_033396,                                                                                                                                                                                                                                                                                                                                                                                                                                                                                                                                                                                                                                                                                                                                                                                                                                                                                                                                                                                                                                                                                                                  |

|               |                                                          |    |                                                                                                                                                                                                                                         |
|---------------|----------------------------------------------------------|----|-----------------------------------------------------------------------------------------------------------------------------------------------------------------------------------------------------------------------------------------|
| GOTERM_BP_ALL | chromosome organization and biogenesis                   | 15 | NM_014292, NM_003169, NM_001271, NM_001005273, NM_005986, NM_032188, XM_293312, NM_012238, NM_002971, NM_020649, NM_022117, NM_005324, NM_001013699, NM_033396, NM_005474,                                                              |
| GOTERM_BP_ALL | chromosome organization and biogenesis (sensu Eukaryota) | 15 | NM_014292, NM_003169, NM_001271, NM_001005273, NM_005986, NM_032188, XM_293312, NM_012238, NM_002971, NM_020649, NM_022117, NM_005324, NM_001013699, NM_033396, NM_005474,                                                              |
| GOTERM_BP_ALL | coenzyme biosynthesis                                    | 15 | NM_007100, NM_005746, NM_148977, NM_006476, NM_006356, NM_001002031, NM_001686, NM_001693, NM_002970, NM_181864, NM_001694, NM_001001937, NM_001685, NM_001001977, NM_001002258,                                                        |
| GOTERM_BP_ALL | coenzyme metabolism                                      | 20 | NM_007100, NM_016518, NM_005746, NM_006755, NM_000365, NM_148977, NM_015256, NM_006476, NM_006356, NM_001002031, NM_001686, NM_001693, NM_002970, NM_181864, NM_001694, NM_001001937, NM_001685, NM_001001977, NM_001002258, NM_001098, |
| GOTERM_BP_ALL | cofactor biosynthesis                                    | 15 | NM_007100, NM_005746, NM_148977, NM_006476, NM_006356, NM_001002031, NM_001686, NM_001693, NM_002970, NM_181864, NM_001694, NM_001001937, NM_001685, NM_001001977, NM_001002258,                                                        |
| GOTERM_BP_ALL | cofactor metabolism                                      | 20 | NM_007100, NM_016518, NM_005746, NM_006755, NM_000365, NM_148977, NM_015256, NM_006476, NM_006356, NM_001002031, NM_001686, NM_001693, NM_002970, NM_181864, NM_001694, NM_001001937, NM_001685, NM_001001977, NM_001002258, NM_001098, |
| GOTERM_MF_ALL | cyclic nucleotide-dependent protein kinase activity      | 13 | NM_002747, NM_003576, NM_002969, NM_013233, NM_001261, NM_014370, NM_005044, NM_032409, NM_002314, NM_002953, NM_006282, NM_014496, NM_212472,                                                                                          |
| GOTERM_MF_ALL | cytochrome-c oxidase activity                            | 5  | NM_004074, NM_004374, NM_004255, NM_001863, NM_001865,                                                                                                                                                                                  |
| GOTERM_MF_ALL | cytokine activity                                        | 13 | NM_003810, NM_005746, NM_001010850, NM_001005611, NM_001511, NM_002341, NM_002983, NM_000576, NM_020530, NM_002984, NM_207007, NM_000584, NM_002964, NM_173842,                                                                         |
| GOTERM_MF_ALL | cytokine binding                                         | 5  | NM_000628, NM_001557, NM_001066, NM_004633, NM_003790,                                                                                                                                                                                  |

|               |                              |     |                                                                                                                                                                                                                                                                                                                                                                                                                                                                                                                                                                                                                                                                                                                                                                                                                                                                                                                                                                                                                                                                                                                                                                                                                                                                                                                        |
|---------------|------------------------------|-----|------------------------------------------------------------------------------------------------------------------------------------------------------------------------------------------------------------------------------------------------------------------------------------------------------------------------------------------------------------------------------------------------------------------------------------------------------------------------------------------------------------------------------------------------------------------------------------------------------------------------------------------------------------------------------------------------------------------------------------------------------------------------------------------------------------------------------------------------------------------------------------------------------------------------------------------------------------------------------------------------------------------------------------------------------------------------------------------------------------------------------------------------------------------------------------------------------------------------------------------------------------------------------------------------------------------------|
| GOTERM_CC_ALL | cytoplasm                    | 277 | <p>NM_005507, NM_000552, NM_002799, NM_178520, NM_001023, NM_000470, NM_000044, NM_000999, NM_012318, NM_032409, NM_000636, NM_001024466, NM_001028, NM_001694, NM_016311, NM_178190, NM_003908, NM_005988, NM_005474, XM_372048, NM_001032, NM_002969, XM_371019, NM_001636, NM_013416, NM_013233, NM_152888, NM_006263, NM_000975, NM_001288, NM_006254, NM_003295, NM_007104, NM_015133, NM_003125, NM_006304, NM_000983, NM_145046, NM_003245, NM_032836, NM_178867, NM_017657, NM_001693, NM_000998, NM_006305, NM_183040, NM_018973, XM_293412, NM_000988, NM_033546, NM_003790, NM_033625, NM_001022, NM_001037663, NM_021029, NM_000994, NM_001402, NM_021130, NM_004541, NM_006088, NM_000996, NM_001015, NM_000976, NM_001002258, NM_005480, NM_021109, NM_001024226, NM_000700, NM_001004, NM_001012321, NM_001686, NM_015414, NM_205840, NM_001031677, NM_003025, NM_003753, NM_000970, NM_001024662, NM_014180, NM_021103, NM_001098, NM_002816, XM_208185, NM_002298, NM_153292, NM_033251, NM_022551, NM_198440, NM_002635, NM_001357, NM_021074, NM_001011, NM_022130, NM_000532, NM_001001, NM_031212, NM_003761, XM_496442, NM_000986, NM_006423, NM_000980, NM_001641, NM_015256, NM_003003, NM_006294, NM_014279, NM_007285, NM_005620, NM_022080, XM_495839, NM_005566, NM_002800, NM_001865,</p> |
| GOTERM_MF_ALL | cytoskeletal protein binding | 28  | <p>NM_003290, NM_005507, NM_021109, NM_183049, NM_007285, NM_006646, NM_153649, NM_001002857, NM_014548, NM_021103, NM_033396, NM_002356, NM_004368, NM_002298, NM_004877, NM_012090, NM_006135, NM_003370, NM_000256, NM_004924, NM_016321, NM_138632, NM_002652, NM_017771, NM_006457, NM_012334, NM_015133, NM_005456,</p>                                                                                                                                                                                                                                                                                                                                                                                                                                                                                                                                                                                                                                                                                                                                                                                                                                                                                                                                                                                          |
| GOTERM_CC_ALL | cytoskeleton                 | 64  | <p>NM_005507, NM_021109, NM_006082, NM_022822, NM_021046, NM_000421, NM_173176, NM_005555, NM_001175, NM_006646, NM_153649, NM_005988, NM_007317, NM_014548, NM_021103, NM_002356, NM_005554, NM_000424, NM_002272, NM_199187, NM_004368, NM_001005611, NM_006135, NM_005731, NM_152862, NM_003388, NM_173352, NM_002284, NM_004389, NM_001664, NM_004693, NM_021019, NM_079423, NM_012334, NM_005721, NM_004434, NM_000526, NM_003290, NM_003125, NM_000226, NM_005720, NM_001101, NM_001614, NM_007285, NM_057088, NM_003245, NM_006617, NM_002274, NM_153490, NM_020238, NM_002276, NM_003458, NM_006009, NM_033546, NM_002705, NM_001017418, NM_006945, NM_012090, NM_004607, NM_003370, NM_001037494, NM_000256, NM_000211, NM_173086, NM_002213, NM_004924, NM_138632, NM_006088, NM_003777, NM_032488,</p>                                                                                                                                                                                                                                                                                                                                                                                                                                                                                                      |

|               |                                                     |    |                                                                                                                                                                                                                                                                                                                                                                                                                                                                                                                                                          |
|---------------|-----------------------------------------------------|----|----------------------------------------------------------------------------------------------------------------------------------------------------------------------------------------------------------------------------------------------------------------------------------------------------------------------------------------------------------------------------------------------------------------------------------------------------------------------------------------------------------------------------------------------------------|
| GOTERM_BP_ALL | cytoskeleton organization and biogenesis            | 30 | NM_005507, NM_006082, NM_198829, NM_021109, NM_183049, NM_022822, NM_005206, NM_001175, NM_001511, NM_057088, NM_006646, NM_002983, NM_007317, NM_181335, NM_006009, NM_021103, NM_000424, NM_002272, NM_004368, NM_006135, NM_001037494, NM_005731, NM_152862, NM_002284, NM_173086, NM_002314, NM_001664, NM_004924, NM_138632, NM_006088, NM_003777, NM_005560,                                                                                                                                                                                       |
| GOTERM_CC_ALL | cytosol                                             | 47 | NM_003900, NM_002799, NM_000980, NM_001014, NM_022822, NM_006304, NM_001004, NM_000992, NM_005347, NM_000983, NM_001012321, NM_201535, NM_002800, NM_005566, NM_002809, NM_017657, NM_015414, NM_002810, NM_000433, NM_001033853, NM_000970, NM_001024662, NM_000969, NM_000968, NM_145897, NM_001002, NM_003790, NM_000971, NM_002816, NM_033625, NM_005789, NM_002298, NM_001022, NM_003973, NM_153292, NM_013416, NM_033251, NM_000990, NM_002952, NM_001009, NM_006263, NM_001005, NM_003407, NM_000996, NM_006457, NM_006013, NM_000981, NM_000976, |
| GOTERM_CC_ALL | cytosolic large ribosomal subunit (sensu Eukaryota) | 18 | NM_000971, NM_033625, NM_000980, NM_003973, NM_000990, NM_001004, NM_000992, NM_000983, NM_015414, NM_000970, NM_001024662, NM_001033853, NM_000969, NM_000996, NM_006013, NM_000968, NM_000981, NM_000976, NM_001002,                                                                                                                                                                                                                                                                                                                                   |
| GOTERM_CC_ALL | cytosolic ribosome (sensu Eukaryota)                | 25 | NM_000980, NM_001014, NM_001004, NM_000992, NM_001012321, NM_000983, NM_015414, NM_000970, NM_001024662, NM_001033853, NM_000969, NM_000968, NM_001002, NM_033625, NM_000971, NM_001022, NM_003973, NM_033251, NM_000990, NM_002952, NM_001009, NM_001005, NM_000996, NM_006013, NM_000981, NM_000976,                                                                                                                                                                                                                                                   |
| GOTERM_CC_ALL | cytosolic small ribosomal subunit (sensu Eukaryota) | 6  | NM_001005, NM_001014, NM_001022, NM_002952, NM_001012321, NM_001009,                                                                                                                                                                                                                                                                                                                                                                                                                                                                                     |
| GOTERM_BP_ALL | death                                               | 33 | NM_007308, NM_005507, NM_003810, NM_003900, NM_000700, NM_173176, NM_015322, NM_005347, NM_021960, NM_000312, NM_201413, NM_020529, NM_012238, NM_014550, NM_002598, NM_006282, NM_005923, NM_001066, NM_003790, NM_015675, NM_003824, NM_004323, NM_001636, NM_003897, NM_023035, NM_004333, NM_005745, NM_000211, NM_005345, NM_000576, NM_003295, NM_006088, NM_018434,                                                                                                                                                                               |

|               |                                            |     |                                                                                                                                                                                                                                                                                                                                                                                                                                                                                                                                                                                                                                                                                                                                                                                                                                                                                                                                                                                                                                                                                                                                                                                          |
|---------------|--------------------------------------------|-----|------------------------------------------------------------------------------------------------------------------------------------------------------------------------------------------------------------------------------------------------------------------------------------------------------------------------------------------------------------------------------------------------------------------------------------------------------------------------------------------------------------------------------------------------------------------------------------------------------------------------------------------------------------------------------------------------------------------------------------------------------------------------------------------------------------------------------------------------------------------------------------------------------------------------------------------------------------------------------------------------------------------------------------------------------------------------------------------------------------------------------------------------------------------------------------------|
| GOTERM_BP_ALL | defense response                           | 57  | NM_003810, NM_006332, NM_001010850, NM_002432, NM_000700, NM_001175, NM_001511, NM_004048, NM_000636, NM_001024466, NM_205840, NM_000628, NM_002032, NM_006058, NM_001623, NM_004847, NM_002984, NM_207007, NM_181652, NM_004633, NM_004267, NM_005474, NM_173842, NM_002468, NM_002029, NM_004107, NM_153292, NM_001005611, NM_013416, NM_006263, NM_016219, NM_005516, NM_005267, NM_013230, NM_001002235, NM_002964, NM_003900, NM_002800, NM_005252, NM_000200, NM_000433, NM_152879, NM_002983, NM_005194, NM_003790, NM_003641, NM_003824, NM_002965, NM_005745, NM_194447, NM_003332, NM_000211, NM_005849, NM_001085, NM_002341, NM_000576, NM_020530, NM_018643, NM_001557, NM_000584, NM_001007555, NM_005054, NM_017420, NM_005100, NM_001511, NM_000044,                                                                                                                                                                                                                                                                                                                                                                                                                     |
| GOTERM_BP_ALL | development                                | 104 | NM_012318, NM_020956, NM_005988, NM_002984, NM_207007, NM_014548, NM_014780, NM_003987, NM_005474, NM_000424, NM_002272, NM_199187, NM_002969, NM_020860, NM_004114, NM_021019, NM_079423, NM_005416, NM_007308, NM_000526, NM_003125, NM_000226, NM_002146, NM_006304, NM_181870, NM_003245, NM_206887, NM_021960, NM_057091, NM_000200, NM_002585, NM_006617, NM_006096, NM_002274, NM_153490, NM_003656, NM_002823, NM_004475, NM_014213, NM_001022, NM_005413, NM_001017418, NM_006945, NM_023035, NM_002581, NM_021999, NM_003564, NM_020244, NM_020530, NM_005437, NM_006457, NM_022117, NM_198829, NM_000421, NM_005555, NM_001175, NM_201535, NM_025264, NM_205840, NM_002968, NM_003025, NM_207171, NM_005987, NM_006291, NM_024016, NM_005554, NM_001005611, NM_003897, NM_000263, NM_003333, NM_021074, NM_003260, NM_006497, NM_002524, NM_207303, NM_003900, NM_032108, NM_014279, NM_031917, NM_006181, NM_000992, NM_003718, NM_005252, NM_001024, NM_152879, NM_012238, NM_001002857, NM_015675, NM_002705, NM_001009181, NM_178439, NM_004333, NM_000211, NM_002959, NM_001426, NM_002213, NM_002357, NM_002314, NM_006357, NM_000584, NM_005245, NM_005560, NM_014496, |
| GOTERM_BP_ALL | di-, tri-valent inorganic cation transport | 7   | NM_002032, NM_014861, NM_001288, NM_032513, NM_023035, NM_000146, NM_178867,                                                                                                                                                                                                                                                                                                                                                                                                                                                                                                                                                                                                                                                                                                                                                                                                                                                                                                                                                                                                                                                                                                             |
| GOTERM_MF_ALL | diacylglycerol binding                     | 5   | NM_152879, NM_020244, NM_006254, NM_004333, NM_201533,                                                                                                                                                                                                                                                                                                                                                                                                                                                                                                                                                                                                                                                                                                                                                                                                                                                                                                                                                                                                                                                                                                                                   |
| GOTERM_BP_ALL | DNA packaging                              | 14  | NM_014292, NM_003169, NM_001271, NM_001005273, NM_005986, NM_032188, XM_293312, NM_012238, NM_002971, NM_020649, NM_022117, NM_005324, NM_001013699, NM_005474,                                                                                                                                                                                                                                                                                                                                                                                                                                                                                                                                                                                                                                                                                                                                                                                                                                                                                                                                                                                                                          |
| GOTERM_CC_ALL | DNA-directed RNA polymerase II, holoenzyme | 5   | NM_005335, NM_005121, NM_003487, NM_015859, NM_012482,                                                                                                                                                                                                                                                                                                                                                                                                                                                                                                                                                                                                                                                                                                                                                                                                                                                                                                                                                                                                                                                                                                                                   |



|               |                                  |    |                                                                                                                                                                                                                                                                                                                                                                                                                                                                                          |
|---------------|----------------------------------|----|------------------------------------------------------------------------------------------------------------------------------------------------------------------------------------------------------------------------------------------------------------------------------------------------------------------------------------------------------------------------------------------------------------------------------------------------------------------------------------------|
| GOTERM_BP_ALL | ectoderm development             | 16 | NM_005554, NM_000526, NM_000424, NM_002272, NM_003125, NM_004475, NM_002705, NM_000226, NM_001005611, NM_000421, NM_005555, NM_001017418, NM_006945, NM_003245, NM_002274, NM_153490, NM_005987, NM_005988, NM_005416,                                                                                                                                                                                                                                                                   |
| GOTERM_MF_ALL | electron carrier activity        | 8  | NM_002491, NM_138454, NM_021074, NM_004549, NM_002489, NM_004541, NM_000126, NM_145283,                                                                                                                                                                                                                                                                                                                                                                                                  |
| GOTERM_BP_ALL | electron transport               | 24 | NM_016518, NM_138454, NM_004074, NM_004549, NM_000018, NM_153292, NM_013416, NM_004374, NM_006294, NM_145283, NM_000918, NM_004255, NM_014402, NM_001863, NM_001865, NM_002491, NM_021074, NM_000786, NM_201413, NM_000126, NM_025072, NM_003329, NM_025150, NM_207127, NM_138454, NM_004549, NM_153292, NM_013416, NM_145283, NM_000918, NM_004255, NM_005576, NM_001865, NM_002491, NM_021074, NM_000433, NM_002489, NM_004541, NM_000126, NM_025072, NM_181652, NM_003329, NM_025150, |
| GOTERM_MF_ALL | electron transporter activity    | 19 | NM_003064, NM_030666, NM_201413, NM_001085, NM_000100, NM_181642, NM_002567, NM_002638, NM_001002235, NM_005213,                                                                                                                                                                                                                                                                                                                                                                         |
| GOTERM_MF_ALL | endopeptidase inhibitor activity | 10 | NM_002029, NM_005817, NM_003295, NM_003569, NM_018171, NM_003761, NM_002959,                                                                                                                                                                                                                                                                                                                                                                                                             |
| GOTERM_CC_ALL | endosome                         | 7  | NM_004074, NM_004549, NM_178526, NM_015256, NM_001636, NM_006294, NM_001002031, NM_004255, NM_014402, NM_002635, NM_001686, NM_001863, NM_021960, NM_001865, NM_003564, NM_021074, NM_001288, NM_001001937, NM_001685, NM_031212, NM_001001977, NM_003624, NM_001002258,                                                                                                                                                                                                                 |
| GOTERM_MF_ALL | enzyme activator activity        | 14 | NM_005789, NM_004877, NM_001175, NM_001511, NM_006263, NM_194301, NM_005500, NM_006788, NM_022771, NM_001494, NM_181335, NM_005923, NM_002923, NM_018390,                                                                                                                                                                                                                                                                                                                                |
| GOTERM_MF_ALL | enzyme binding                   | 17 | NM_003824, NM_003900, NM_003347, NM_003169, NM_032836, NM_000211, NM_002032, NM_020529, NM_020812, NM_138632, NM_006457, NM_005858, NM_006098, NM_003624, NM_015133, NM_033396, NM_005456,                                                                                                                                                                                                                                                                                               |
| GOTERM_MF_ALL | enzyme inhibitor activity        | 20 | NM_003064, NM_212492, NM_004877, NM_000700, NM_181642, NM_002537, NM_005347, NM_030666, NM_001085, NM_201413, NM_000100, NM_016311, NM_178190, NM_001002857, NM_001800, NM_002567, NM_004152, NM_002638, NM_001002235, NM_005213, NM_005456,                                                                                                                                                                                                                                             |

|               |                                                            |    |                                                                                                                                                                                                                                                                                                                                                                                                                                         |
|---------------|------------------------------------------------------------|----|-----------------------------------------------------------------------------------------------------------------------------------------------------------------------------------------------------------------------------------------------------------------------------------------------------------------------------------------------------------------------------------------------------------------------------------------|
|               |                                                            |    | NM_212492, NM_000700, NM_181642, NM_002537, NM_001175, NM_001511, NM_005347, NM_030666, NM_201413, NM_020812, NM_000100, NM_016311, NM_178190, NM_001002857, NM_194301, NM_005500, NM_001800, NM_002567, NM_006788, NM_181335, NM_002638, NM_005923, NM_005213, NM_003064, NM_005789, NM_004877, NM_007355, NM_006263, NM_001085, NM_022771, NM_001494, NM_004152, NM_001002235, NM_004227, NM_002923, NM_018390, NM_005456, NM_212472, |
| GOTERM_MF_ALL | enzyme regulator activity                                  | 37 |                                                                                                                                                                                                                                                                                                                                                                                                                                         |
| GOTERM_BP_ALL | epidermal cell differentiation                             | 7  | NM_003125, NM_002705, NM_005987, NM_005988, NM_001017418, NM_006945, NM_003245, NM_005416,                                                                                                                                                                                                                                                                                                                                              |
| GOTERM_BP_ALL | epidermis development                                      | 13 | NM_000424, NM_002272, NM_000526, NM_003125, NM_004475, NM_002705, NM_000226, NM_000421, NM_001017418, NM_006945, NM_003245, NM_002274, NM_153490, NM_005987, NM_005988, NM_005416,                                                                                                                                                                                                                                                      |
| GOTERM_BP_ALL | epidermis morphogenesis                                    | 7  | NM_003125, NM_002705, NM_005987, NM_005988, NM_001017418, NM_006945, NM_003245, NM_005416,                                                                                                                                                                                                                                                                                                                                              |
| GOTERM_BP_ALL | ER to Golgi vesicle-mediated transport                     | 5  | NM_001024226, NM_198398, NM_022080, NM_005745, NM_001662, NM_014292, NM_003169, NM_001271, NM_001005273, NM_005986, NM_032188, XM_293312, NM_012238, NM_002971, NM_020649, NM_022117, NM_005324, NM_001013699, NM_005474,                                                                                                                                                                                                               |
| GOTERM_BP_ALL | establishment and/or maintenance of chromatin architecture | 14 |                                                                                                                                                                                                                                                                                                                                                                                                                                         |
| GOTERM_BP_ALL | establishment of cellular localization                     | 32 | NM_003900, NM_032452, NM_005932, NM_006082, NM_001024226, NM_022822, NM_007285, NM_198398, NM_005487, NM_022080, NM_005131, NM_001662, NM_020529, NM_002486, NM_006305, NM_001017998, NM_007317, NM_006009, NM_001636, NM_199040, NM_007347, NM_003569, NM_005745, NM_000978, NM_002959, NM_001664, NM_006088, NM_003777, NM_004069, NM_002136, NM_031431, NM_003624,                                                                   |

|               |                                                |     |                                                                                                                                                                                                                                                                                                                                                                                                                                                                                                                                                                                                                                                                                                                                                                                                                                                                                                                                                                                                                                                                                                                                                                                                                                                                                                 |
|---------------|------------------------------------------------|-----|-------------------------------------------------------------------------------------------------------------------------------------------------------------------------------------------------------------------------------------------------------------------------------------------------------------------------------------------------------------------------------------------------------------------------------------------------------------------------------------------------------------------------------------------------------------------------------------------------------------------------------------------------------------------------------------------------------------------------------------------------------------------------------------------------------------------------------------------------------------------------------------------------------------------------------------------------------------------------------------------------------------------------------------------------------------------------------------------------------------------------------------------------------------------------------------------------------------------------------------------------------------------------------------------------|
| GOTERM_BP_ALL | establishment of localization                  | 159 | NM_032452, NM_178320, NM_022822, NM_000470, NM_000044, NM_003487, NM_005131, NM_152313, NM_002491, NM_002032, NM_001694, NM_201413, NM_002556, NM_006788, NM_002984, NM_207007, NM_007317, NM_181335, NM_005072, NM_025150, NM_002356, NM_207127, NM_007100, NM_002029, NM_001636, NM_013416, NM_199040, NM_145283, NM_152888, NM_152868, NM_138813, NM_000978, NM_004519, NM_000288, NM_001288, NM_001001937, NM_003329, NM_002136, NM_005858, NM_004227, NM_015133, NM_005721, NM_005720, NM_001101, NM_001614, NM_001005377, NM_014453, NM_033323, NM_001014797, NM_033223, NM_001002031, NM_004781, NM_178867, NM_017657, NM_001693, NM_001662, NM_019849, NM_000786, NM_020529, NM_002486, NM_006305, NM_001685, NM_001853, NM_006009, NM_020548, NM_213601, NM_007347, NM_023035, NM_005745, NM_006088, NM_003777, NM_031431, NM_001002258, NM_183235, NM_005456, NM_006822, NM_006082, NM_198829, NM_001024226, NM_000700, NM_001175, NM_004255, NM_198398, NM_001686, NM_001863, NM_052859, NM_001031677, NM_005817, NM_001017998, NM_176812, NM_000146, NM_004366, NM_153292, NM_001005611, NM_018593, NM_181836, NM_006356, NM_000918, NM_014402, NM_006135, NM_002635, NM_004976, NM_003333, NM_005731, NM_152862, NM_021074, NM_016226, NM_001664, NM_000238, NM_005267, NM_002524, |
| GOTERM_BP_ALL | establishment of protein localization          | 28  | NM_032452, NM_005932, NM_001024226, NM_014453, NM_007285, NM_022080, NM_017657, NM_001662, NM_020529, NM_001031677, NM_001017998, NM_176812, NM_007347, NM_003569, NM_005745, NM_000978, NM_002959, NM_016226, NM_001664, NM_000288, NM_001494, NM_004069, NM_031431, NM_021168, NM_003624, NM_183235, NM_019059, NM_006822,                                                                                                                                                                                                                                                                                                                                                                                                                                                                                                                                                                                                                                                                                                                                                                                                                                                                                                                                                                    |
| GOTERM_CC_ALL | eukaryotic 43S preinitiation complex           | 8   | NM_001005, NM_001014, NM_001022, NM_003753, NM_003908, NM_002952, NM_001012321, NM_001009,                                                                                                                                                                                                                                                                                                                                                                                                                                                                                                                                                                                                                                                                                                                                                                                                                                                                                                                                                                                                                                                                                                                                                                                                      |
| GOTERM_CC_ALL | eukaryotic 48S initiation complex              | 6   | NM_001005, NM_001014, NM_001022, NM_002952, NM_001012321, NM_001009,                                                                                                                                                                                                                                                                                                                                                                                                                                                                                                                                                                                                                                                                                                                                                                                                                                                                                                                                                                                                                                                                                                                                                                                                                            |
| GOTERM_BP_ALL | generation of precursor metabolites and energy | 49  | NM_000365, NM_006476, NM_004255, NM_001686, NM_001863, NM_002491, NM_201413, NM_001694, NM_016311, NM_178190, NM_025150, NM_207127, NM_001098, NM_007100, NM_006755, NM_153292, NM_184041, NM_013416, NM_006356, NM_145283, NM_014402, NM_000918, NM_002710, NM_002635, NM_021074, NM_001001937, NM_025072, NM_003329, NM_016518, NM_004549, NM_004074, NM_000018, NM_006294, NM_001002031, NM_005609, NM_005566, NM_001865, NM_001693, NM_000786, NM_002046, NM_001685, NM_001001977, NM_138454, NM_001675, NM_004374, NM_000291, NM_004541, NM_000126, NM_000160, NM_001002258,                                                                                                                                                                                                                                                                                                                                                                                                                                                                                                                                                                                                                                                                                                               |

|               |                                       |    |                                                                                                                                                                                                                                                                                  |
|---------------|---------------------------------------|----|----------------------------------------------------------------------------------------------------------------------------------------------------------------------------------------------------------------------------------------------------------------------------------|
| GOTERM_BP_ALL | glucose catabolism                    | 6  | NM_006755, NM_000365, NM_000291, NM_002046, NM_184041, NM_005566,                                                                                                                                                                                                                |
| GOTERM_BP_ALL | glucose metabolism                    | 7  | NM_006755, NM_001675, NM_000365, NM_000291, NM_002046, NM_184041, NM_005566,                                                                                                                                                                                                     |
| GOTERM_BP_ALL | glycolysis                            | 5  | NM_000365, NM_000291, NM_002046, NM_184041, NM_005566,                                                                                                                                                                                                                           |
| GOTERM_CC_ALL | Golgi apparatus                       | 23 | NM_022087, NM_005114, NM_032452, NM_006423, NM_001024226, NM_003003, NM_007285, NM_007347, NM_022080, NM_017657, NM_001662, NM_002959, NM_205840, NM_001031677, NM_032591, NM_005817, NM_002556, NM_003896, NM_002524, NM_022130, NM_031431, NM_004267, NM_012235,               |
| GOTERM_BP_ALL | Golgi vesicle transport               | 6  | NM_001024226, NM_003569, NM_198398, NM_022080, NM_005745, NM_001662,                                                                                                                                                                                                             |
| GOTERM_MF_ALL | GTP binding                           | 24 | NM_021205, NM_198829, NM_006082, NM_001024226, NM_175571, NM_003245, NM_024996, NM_001402, NM_001662, NM_001664, NM_001031677, NM_006270, NM_020812, NM_002524, NM_021033, NM_138769, NM_001017998, NM_006088, NM_001665, NM_006009, NM_021168, NM_002872, NM_183235, NM_006822, |
| GOTERM_MF_ALL | GTPase activity                       | 16 | NM_198829, NM_006082, NM_001024226, NM_003245, NM_001402, NM_001662, NM_001664, NM_006270, NM_002524, NM_021033, NM_001017998, NM_001665, NM_006088, NM_006009, NM_002872, NM_183235,                                                                                            |
| GOTERM_MF_ALL | guanyl nucleotide binding             | 24 | NM_021205, NM_198829, NM_006082, NM_001024226, NM_175571, NM_003245, NM_024996, NM_001402, NM_001662, NM_001664, NM_001031677, NM_006270, NM_020812, NM_002524, NM_021033, NM_138769, NM_001017998, NM_006088, NM_001665, NM_006009, NM_021168, NM_002872, NM_183235, NM_006822, |
| GOTERM_MF_ALL | heme-copper terminal oxidase activity | 5  | NM_004074, NM_004374, NM_004255, NM_001863, NM_001865,                                                                                                                                                                                                                           |
| GOTERM_MF_ALL | heparin binding                       | 5  | NM_003247, NM_201413, NM_000992, NM_000983, NM_000093,                                                                                                                                                                                                                           |
| GOTERM_BP_ALL | hexose catabolism                     | 6  | NM_006755, NM_000365, NM_000291, NM_002046, NM_184041, NM_005566,                                                                                                                                                                                                                |
| GOTERM_BP_ALL | homeostasis                           | 12 | NM_002032, NM_004174, NM_032591, NM_201413, NM_002983, NM_000576, NM_025072, NM_023035, NM_005072, NM_000146, NM_000702, NM_021960, NM_004549, NM_004074, NM_006476, NM_006294, NM_001002031, NM_004255,                                                                         |
| GOTERM_MF_ALL | hydrogen ion transporter activity     | 25 | NM_001686, NM_001863, NM_001865, NM_001693, NM_002491, NM_001694, NM_001685, NM_001001977, NM_007100, NM_004374, NM_006356, NM_014402, NM_021074, NM_032591, NM_004174, NM_001001937, NM_002489, NM_004541, NM_001002258,                                                        |
| GOTERM_BP_ALL | hydrogen transport                    | 13 | NM_007100, NM_014861, NM_006476, NM_006356, NM_001002031, NM_001686, NM_001693, NM_001694, NM_001001937, NM_001685, NM_001001977, NM_001002258, NM_000702,                                                                                                                       |

|               |                                                                                                |    |                                                                                                                                                                                                                                                                                                                                                                                                                                                                   |
|---------------|------------------------------------------------------------------------------------------------|----|-------------------------------------------------------------------------------------------------------------------------------------------------------------------------------------------------------------------------------------------------------------------------------------------------------------------------------------------------------------------------------------------------------------------------------------------------------------------|
| GOTERM_MF_ALL | hydrogen-transporting ATP synthase activity, rotational mechanism                              | 11 | NM_007100, NM_001694, NM_001001937, NM_006476, NM_001002031, NM_006356, NM_001685, NM_001001977, NM_001686, NM_001002258, NM_001693,                                                                                                                                                                                                                                                                                                                              |
| GOTERM_MF_ALL | hydrogen-transporting ATPase activity, rotational mechanism                                    | 11 | NM_007100, NM_001694, NM_001001937, NM_006476, NM_001002031, NM_006356, NM_001685, NM_001001977, NM_001686, NM_001002258, NM_001693,                                                                                                                                                                                                                                                                                                                              |
| GOTERM_MF_ALL | hydrogen-transporting two-sector ATPase activity                                               | 11 | NM_007100, NM_001694, NM_001001937, NM_006476, NM_001002031, NM_006356, NM_001685, NM_001001977, NM_001686, NM_001002258, NM_001693,                                                                                                                                                                                                                                                                                                                              |
| GOTERM_MF_ALL | hydrolase activity, acting on acid anhydrides                                                  | 39 | NM_014861, NM_006082, NM_198829, NM_001024226, NM_006476, NM_024045, NM_001002031, NM_001686, NM_001005273, NM_003245, NM_001693, NM_001662, NM_001694, NM_006270, NM_001017998, NM_001665, NM_001685, NM_006009, NM_001001977, NM_002872, NM_000702, NM_007100, NM_006597, NM_199040, NM_006356, NM_000352, NM_138813, NM_001271, NM_001402, NM_001357, NM_001664, NM_001001937, NM_002524, NM_021033, NM_006088, NM_003777, NM_001002258, NM_001967, NM_183235, |
| GOTERM_MF_ALL | hydrolase activity, acting on acid anhydrides, catalyzing transmembrane movement of substances | 15 | NM_007100, NM_014861, NM_006476, NM_006356, NM_000352, NM_001002031, NM_138813, NM_001686, NM_001693, NM_001694, NM_001001937, NM_001685, NM_001001977, NM_001002258, NM_000702,                                                                                                                                                                                                                                                                                  |
| GOTERM_MF_ALL | hydrolase activity, acting on acid anhydrides, in phosphorus-containing anhydrides             | 39 | NM_014861, NM_006082, NM_198829, NM_001024226, NM_006476, NM_024045, NM_001002031, NM_001686, NM_001005273, NM_003245, NM_001693, NM_001662, NM_001694, NM_006270, NM_001017998, NM_001665, NM_001685, NM_006009, NM_001001977, NM_002872, NM_000702, NM_007100, NM_006597, NM_199040, NM_006356, NM_000352, NM_138813, NM_001271, NM_001402, NM_001357, NM_001664, NM_001001937, NM_002524, NM_021033, NM_006088, NM_003777, NM_001002258, NM_001967, NM_183235, |
| GOTERM_MF_ALL | identical protein binding                                                                      | 12 | NM_004566, NM_005789, NM_006423, NM_033141, NM_032591, NM_130847, NM_183040, NM_006282, NM_005923, NM_000146, NM_000521, NM_024096,                                                                                                                                                                                                                                                                                                                               |
| GOTERM_BP_ALL | I-kappaB kinase/NF-kappaB cascade                                                              | 11 | NM_002468, NM_003824, NM_003900, NM_000985, NM_003810, NM_016479, NM_001664, NM_020529, NM_014550, NM_000801, NM_001001483,                                                                                                                                                                                                                                                                                                                                       |

|               |                                    |    |                                                                                                                                                                                                                                                                                                                                                                                                                                                                                                                                                                                                                                                     |
|---------------|------------------------------------|----|-----------------------------------------------------------------------------------------------------------------------------------------------------------------------------------------------------------------------------------------------------------------------------------------------------------------------------------------------------------------------------------------------------------------------------------------------------------------------------------------------------------------------------------------------------------------------------------------------------------------------------------------------------|
| GOTERM_BP_ALL | immune response                    | 53 | NM_003810, NM_006332, NM_001010850, NM_002432, NM_000700, NM_001175, NM_001511, NM_004048, NM_000636, NM_001024466, NM_205840, NM_000628, NM_002032, NM_001623, NM_004847, NM_002984, NM_207007, NM_181652, NM_004633, NM_004267, NM_005474, NM_173842, NM_002468, NM_002029, NM_004107, NM_153292, NM_001005611, NM_006263, NM_005267, NM_005516, NM_013230, NM_001002235, NM_002964, NM_003900, NM_002800, NM_005252, NM_000433, NM_152879, NM_002983, NM_005194, NM_003790, NM_003641, NM_003824, NM_002965, NM_194447, NM_005745, NM_003332, NM_000211, NM_005849, NM_001085, NM_002341, NM_000576, NM_020530, NM_018643, NM_001557, NM_000584, |
| GOTERM_BP_ALL | inflammatory response              | 22 | NM_002468, NM_002029, NM_002965, NM_153292, NM_000700, NM_001511, NM_000211, NM_005252, NM_000628, NM_001085, NM_002983, NM_001623, NM_004847, NM_000576, NM_002984, NM_207007, NM_005194, NM_181652, NM_001557, NM_000584, NM_004267, NM_173842, NM_005474, NM_002964,                                                                                                                                                                                                                                                                                                                                                                             |
| GOTERM_BP_ALL | inorganic anion transport          | 10 | NM_001288, NM_001005611, NM_033323, NM_033223, NM_005072, NM_001853, NM_152888, NM_002635, NM_000093, NM_004366,                                                                                                                                                                                                                                                                                                                                                                                                                                                                                                                                    |
| GOTERM_CC_ALL | intermediate filament              | 17 | NM_005554, NM_000526, NM_000424, NM_002272, NM_199187, NM_003125, NM_000226, NM_021046, NM_000421, NM_005555, NM_057088, NM_173352, NM_006617, NM_002284, NM_173086, NM_002274, NM_153490, NM_004693, NM_002276,                                                                                                                                                                                                                                                                                                                                                                                                                                    |
| GOTERM_CC_ALL | intermediate filament cytoskeleton | 17 | NM_005554, NM_000526, NM_000424, NM_002272, NM_199187, NM_003125, NM_000226, NM_021046, NM_000421, NM_005555, NM_057088, NM_173352, NM_006617, NM_002284, NM_173086, NM_002274, NM_153490, NM_004693, NM_002276,                                                                                                                                                                                                                                                                                                                                                                                                                                    |

|               |                                        |     |                                                                                                                                                                                                                                                                                                                                                                                                                                                                                                                                                                                                                                                                                                                                                                                                                                                                                                                                                                                                                                                                                                                                                                                                                                                                                                                                                                                                                                                                                                                                                                                                                                                                                                                                                                                                                                                                                                                                                                                                                                                                                                                                                                                                                                                                                                                                                                                                                                                                                                                                                                                                                                 |
|---------------|----------------------------------------|-----|---------------------------------------------------------------------------------------------------------------------------------------------------------------------------------------------------------------------------------------------------------------------------------------------------------------------------------------------------------------------------------------------------------------------------------------------------------------------------------------------------------------------------------------------------------------------------------------------------------------------------------------------------------------------------------------------------------------------------------------------------------------------------------------------------------------------------------------------------------------------------------------------------------------------------------------------------------------------------------------------------------------------------------------------------------------------------------------------------------------------------------------------------------------------------------------------------------------------------------------------------------------------------------------------------------------------------------------------------------------------------------------------------------------------------------------------------------------------------------------------------------------------------------------------------------------------------------------------------------------------------------------------------------------------------------------------------------------------------------------------------------------------------------------------------------------------------------------------------------------------------------------------------------------------------------------------------------------------------------------------------------------------------------------------------------------------------------------------------------------------------------------------------------------------------------------------------------------------------------------------------------------------------------------------------------------------------------------------------------------------------------------------------------------------------------------------------------------------------------------------------------------------------------------------------------------------------------------------------------------------------------|
| GOTERM_CC_ALL | intracellular                          | 486 | <p>NM_000532, NM_002755, NM_178520, NM_032240, NM_017420, NM_003108, NM_001005273, NM_000999, NM_012318, NM_002013, NM_203374, NM_020956, NM_003908, NM_007317, NM_152414, NM_002356, NM_005474, XM_372048, NM_000424, NM_002272, NM_001032, NM_013233, NM_024700, NM_152888, NM_006263, NM_019084, NM_007104, NM_005858, NM_012482, NM_212472, NM_003290, NM_003125, NM_016604, NM_001101, NM_001614, NM_002146, NM_006304, NM_005968, NM_145046, NM_003245, NM_001015052, NM_018694, NM_006617, NM_000998, NM_005500, NM_003656, NM_006305, NM_183040, NM_013293, XM_293412, NM_000988, NM_005341, NM_001037663, NM_021029, NM_000994, NM_003428, NM_005986, NM_030613, NM_001085, NM_004541, NM_021130, NM_052978, NM_000996, NM_001015, NM_002691, NM_001004333, NM_001002258, NM_018942, NM_001010850, NM_017900, NM_020183, NM_001024226, NM_003487, NM_000421, NM_001004, NM_001686, NM_015335, NM_015414, NM_025264, NM_205840, NM_032188, NM_006058, NM_002968, NM_003025, NM_003753, NM_000970, NM_001024662, NM_033267, NM_021103, NM_005484, NM_002298, NM_153292, NM_006135, NM_003169, NM_002635, NM_001357, NM_021074, NM_173352, NM_006497, NM_001664, NM_022130, NM_000532, NM_012334, NM_003761, NM_000980, NM_003003, NM_005620, NM_005566, NM_002800, NM_001865, NM_005801, XM_058967, NM_001024, NM_005507, NM_000532, NM_178520, NM_005858, NM_000470, NM_017420, NM_003108, NM_000044, NM_018429, NM_001005273, NM_004926, NM_012318, NM_032409, NM_000636, NM_001024466, NM_002013, NM_006606, NM_001694, NM_203374, NM_020956, NM_016311, NM_178190, NM_018320, NM_007317, NM_014780, NM_152414, NM_021167, NM_005474, NM_006597, NM_001636, NM_013233, NM_024700, NM_014884, NM_001288, NM_003295, NM_019084, NM_005858, NM_012482, NM_001039465, NM_016604, NM_001101, NM_001614, NM_002146, NM_005968, NM_145046, NM_032836, NM_178867, NM_001015052, NM_017657, NM_018694, NM_002585, NM_003113, NM_005121, NM_005500, NM_003656, NM_006305, NM_183040, NM_018973, NM_013293, NM_005341, NM_005413, NM_003428, NM_013234, NM_005986, NM_030613, NM_004593, NM_004541, NM_005437, NM_002691, NM_001004333, NM_001002258, NM_018942, NM_013286, NM_001010850, NM_017900, NM_020183, NM_001024226, NM_003487, NM_207395, NM_001012321, NM_001686, NM_015335, NM_025264, NM_205840, NM_032188, NM_001031677, NM_002968, NM_006058, NM_033267, NM_024016, NM_005484, NM_001098, NM_198440, NM_003169, NM_002635, NM_001357, NM_021074, NM_006497, NM_001011, NM_005381, NM_022130, NM_000532, NM_003168, NM_031212, NM_005324, NM_003761, NM_001025204, NM_006423, NM_001641, NM_023067, NM_015256,</p> |
| GOTERM_CC_ALL | intracellular membrane-bound organelle | 281 | <p>NM_000532, NM_002755, NM_178520, NM_032240, NM_017420, NM_003108, NM_001005273, NM_000999, NM_012318, NM_002013, NM_203374, NM_020956, NM_003908, NM_007317, NM_152414, NM_002356, NM_005474, XM_372048, NM_000424, NM_002272, NM_001032, NM_013233, NM_024700, NM_152888, NM_006263, NM_019084, NM_007104, NM_005858, NM_012482, NM_212472, NM_003290, NM_003125, NM_016604, NM_001101, NM_001614, NM_002146, NM_006304, NM_005968, NM_145046, NM_003245, NM_001015052, NM_018694, NM_006617, NM_000998, NM_005500, NM_003656, NM_006305, NM_183040, NM_013293, XM_293412, NM_000988, NM_005341, NM_001037663, NM_021029, NM_000994, NM_003428, NM_005986, NM_030613, NM_001085, NM_004541, NM_021130, NM_052978, NM_000996, NM_001015, NM_002691, NM_001004333, NM_001002258, NM_018942, NM_001010850, NM_017900, NM_020183, NM_001024226, NM_003487, NM_000421, NM_001004, NM_001686, NM_015335, NM_015414, NM_025264, NM_205840, NM_032188, NM_006058, NM_002968, NM_003025, NM_003753, NM_000970, NM_001024662, NM_033267, NM_021103, NM_005484, NM_002298, NM_153292, NM_006135, NM_003169, NM_002635, NM_001357, NM_021074, NM_173352, NM_006497, NM_001664, NM_022130, NM_000532, NM_012334, NM_003761, NM_000980, NM_003003, NM_005620, NM_005566, NM_002800, NM_001865, NM_005801, XM_058967, NM_001024, NM_005507, NM_000532, NM_178520, NM_005858, NM_000470, NM_017420, NM_003108, NM_000044, NM_018429, NM_001005273, NM_004926, NM_012318, NM_032409, NM_000636, NM_001024466, NM_002013, NM_006606, NM_001694, NM_203374, NM_020956, NM_016311, NM_178190, NM_018320, NM_007317, NM_014780, NM_152414, NM_021167, NM_005474, NM_006597, NM_001636, NM_013233, NM_024700, NM_014884, NM_001288, NM_003295, NM_019084, NM_005858, NM_012482, NM_001039465, NM_016604, NM_001101, NM_001614, NM_002146, NM_005968, NM_145046, NM_032836, NM_178867, NM_001015052, NM_017657, NM_018694, NM_002585, NM_003113, NM_005121, NM_005500, NM_003656, NM_006305, NM_183040, NM_018973, NM_013293, NM_005341, NM_005413, NM_003428, NM_013234, NM_005986, NM_030613, NM_004593, NM_004541, NM_005437, NM_002691, NM_001004333, NM_001002258, NM_018942, NM_013286, NM_001010850, NM_017900, NM_020183, NM_001024226, NM_003487, NM_207395, NM_001012321, NM_001686, NM_015335, NM_025264, NM_205840, NM_032188, NM_001031677, NM_002968, NM_006058, NM_033267, NM_024016, NM_005484, NM_001098, NM_198440, NM_003169, NM_002635, NM_001357, NM_021074, NM_006497, NM_001011, NM_005381, NM_022130, NM_000532, NM_003168, NM_031212, NM_005324, NM_003761, NM_001025204, NM_006423, NM_001641, NM_023067, NM_015256,</p> |

|               |                                            |     |                                                                                                                                                                                                                                                                                                                                                                                                                                                                                                                                                                                                                                                                                                                                                                                                                                                                                                                                                                                                                                                                                                                                                                                                                                                                                                                                                                                  |
|---------------|--------------------------------------------|-----|----------------------------------------------------------------------------------------------------------------------------------------------------------------------------------------------------------------------------------------------------------------------------------------------------------------------------------------------------------------------------------------------------------------------------------------------------------------------------------------------------------------------------------------------------------------------------------------------------------------------------------------------------------------------------------------------------------------------------------------------------------------------------------------------------------------------------------------------------------------------------------------------------------------------------------------------------------------------------------------------------------------------------------------------------------------------------------------------------------------------------------------------------------------------------------------------------------------------------------------------------------------------------------------------------------------------------------------------------------------------------------|
| GOTERM_CC_ALL | intracellular non-membrane-bound organelle | 165 | <p>NM_005507, XM_371853, NM_005054, NM_001023, NM_022822, NM_173170, XM_927103, NM_005487, NM_001005273, NM_000999, NM_001028, NM_001025071, NM_005617, NM_153649, NM_000972, NM_003908, NM_005988, NM_007317, NM_201998, NM_170738, NM_014548, NM_002356, NM_199187, NM_000985, XM_372048, NM_001006, NM_000424, NM_002272, NM_001032, NM_001026, NM_001997, XM_371019, NM_000978, NM_003388, NM_000975, NM_002284, NM_000989, NM_004693, NM_021019, NM_079423, NM_007104, NM_001068, NM_000981, NM_001013699, NM_005721, NM_001012, NM_002954, NM_000526, NM_003290, NM_003125, NM_000226, NM_005720, NM_001101, NM_001614, NM_002948, NM_000983, NM_057088, NM_003245, NM_006617, NM_003113, NM_002274, NM_153490, NM_000998, NM_020238, NM_000969, NM_002276, XM_015717, NM_014445, NM_006009, XM_293412, NM_000988, NM_033546, NM_001002, NM_000971, NM_033625, NM_001022, NM_000984, NM_001017, NM_001017418, NM_006945, NM_002952, NM_001037494, NM_021029, NM_001009, XM_370611, NM_000994, NM_001005, NM_173086, NM_006088, NM_000996, NM_003777, NM_001015, NM_001025, NM_000976, NM_022117, NM_001014, NM_021109, NM_006082, NM_001000, NM_005555, NM_021046, NM_000421, NM_001004, NM_001175, NM_001012321, NM_001007, NM_015414, NM_032188, NM_006646, XM_293312, NM_001033853, NM_000970, NM_000532, NM_170320, NM_017420, NM_005100, NM_001005273, NM_000999,</p> |
| GOTERM_CC_ALL | intracellular organelle                    | 408 | <p>NM_012318, NM_002013, NM_203374, NM_020956, NM_003908, NM_007317, NM_152414, NM_002356, NM_005474, XM_372048, NM_000424, NM_002272, NM_001032, NM_013233, NM_024700, NM_019084, NM_007104, NM_005858, NM_012482, NM_003290, NM_003125, NM_016604, NM_001101, NM_001614, NM_002146, NM_005968, NM_145046, NM_003245, NM_001015052, NM_018694, NM_006617, NM_000998, NM_005500, NM_003656, NM_006305, NM_183040, NM_013293, XM_293412, NM_000988, NM_005341, NM_021029, NM_000994, NM_003428, NM_005986, NM_030613, NM_004541, NM_000996, NM_001015, NM_002691, NM_001004333, NM_001002258, NM_018942, NM_001010850, NM_017900, NM_020183, NM_001024226, NM_003487, NM_000421, NM_001004, NM_001686, NM_015335, NM_015414, NM_025264, NM_205840, NM_032188, NM_006058, NM_002968, NM_000970, NM_001024662, NM_033267, NM_021103, NM_005484, NM_006135, NM_003169, NM_002635, NM_001357, NM_021074, NM_173352, NM_006497, NM_001664, NM_022130, NM_000532, NM_012334, NM_003761, NM_000980, NM_003003, NM_005620, NM_001865, NM_001024, NM_020357, NM_012238, NM_005194, NM_145897, NM_012235, NM_012423, NM_002705, NM_004729, NM_019001, NM_001426, NM_004924, NM_138632, NM_006357, NM_015859, NM_020649, XM_371853, NM_031844, NM_022822,</p>                                                                                                                                |



|               |                                 |     |                                                                                                                                                                                                                                                                                                                                                                                                                                                                                                                                                                                                                                                                                                                                                                                                                                                                                                                                                                                                                                                                                                                                                                                                                                                                                                                                |
|---------------|---------------------------------|-----|--------------------------------------------------------------------------------------------------------------------------------------------------------------------------------------------------------------------------------------------------------------------------------------------------------------------------------------------------------------------------------------------------------------------------------------------------------------------------------------------------------------------------------------------------------------------------------------------------------------------------------------------------------------------------------------------------------------------------------------------------------------------------------------------------------------------------------------------------------------------------------------------------------------------------------------------------------------------------------------------------------------------------------------------------------------------------------------------------------------------------------------------------------------------------------------------------------------------------------------------------------------------------------------------------------------------------------|
| GOTERM_BP_ALL | intracellular signaling cascade | 64  | <p>NM_003810, NM_005507, NM_021205, NM_033141, NM_198829, NM_212492, NM_001024226, NM_032246, NM_001175, NM_001511, NM_032409, NM_001031677, NM_006270, NM_014550, NM_001665, NM_006282, NM_006098, NM_002872, NM_201533, NM_002468, NM_002029, NM_000985, NM_013416, NM_199040, NM_001664, NM_006254, NM_002524, NM_021168, NM_003624, NM_015133, NM_212472, NM_003900, NM_005335, NM_005206, NM_181870, NM_001662, NM_152879, NM_020529, NM_005121, NM_006305, NM_005923, NM_001001483, NM_001114, NM_012235, NM_015675, NM_003824, NM_016479, NM_004333, NM_007184, NM_003332, NM_002314, NM_138769, NM_002664, NM_021033, NM_018643, NM_000801, NM_017771, NM_005437, NM_000160, NM_001557, NM_000584, NM_183235, NM_006822, NM_005456,</p>                                                                                                                                                                                                                                                                                                                                                                                                                                                                                                                                                                                |
| GOTERM_BP_ALL | intracellular transport         | 32  | <p>NM_003900, NM_032452, NM_005932, NM_006082, NM_001024226, NM_022822, NM_007285, NM_198398, NM_005487, NM_022080, NM_005131, NM_001662, NM_020529, NM_002486, NM_006305, NM_001017998, NM_007317, NM_006009, NM_001636, NM_199040, NM_007347, NM_003569, NM_005745, NM_000978, NM_002959, NM_001664, NM_006088, NM_003777, NM_004069, NM_002136, NM_031431, NM_003624,</p>                                                                                                                                                                                                                                                                                                                                                                                                                                                                                                                                                                                                                                                                                                                                                                                                                                                                                                                                                   |
| GOTERM_MF_ALL | ion binding                     | 151 | <p>NM_032246, NM_000476, NM_000044, NM_005347, NM_005487, NM_001005273, NM_004926, NM_194460, NM_012318, NM_032409, NM_000636, NM_001024466, NM_002032, NM_145699, NM_001694, NM_201413, NM_203374, NM_001623, NM_004847, NM_003908, NM_018320, NM_019554, NM_201998, NM_005072, NM_001312, NM_130901, NM_025150, NM_201533, NM_007100, NM_020860, NM_002969, NM_022486, NM_001064, NM_199040, NM_152831, NM_152868, NM_138813, NM_144641, NM_004519, NM_006397, NM_006254, NM_006635, NM_003295, NM_001001937, NM_021019, NM_079423, NM_005858, NM_012482, NM_002964, NM_017722, NM_001014797, NM_145046, NM_003245, NM_032836, NM_178867, NM_001693, NM_000200, NM_003113, NM_000786, NM_000998, NM_002598, NM_005923, NM_001001483, NM_033546, NM_001114, NM_022087, NM_005341, NM_023035, NM_002581, NM_003428, NM_030613, NM_138769, NM_052978, NM_170770, NM_006457, NM_002691, NM_003810, NM_001010850, NM_000700, NM_003487, NM_004255, NM_207395, NM_005184, NM_002966, NM_001686, NM_005576, NM_016190, NM_032188, NM_003247, NM_002968, NM_032876, NM_207171, NM_015906, NM_001964, NM_006282, NM_000146, NM_001098, NM_002298, NM_153292, NM_002710, NM_014615, NM_001795, NM_004976, NM_003453, NM_016219, NM_024329, NM_021074, NM_006497, NM_001664, NM_003407, NM_000238, NM_022118, NM_015457, NM_003168,</p> |

|               |                          |    |                                                                                                                                                                                                                                                                                                                                                                                                                                                                                                                                                     |
|---------------|--------------------------|----|-----------------------------------------------------------------------------------------------------------------------------------------------------------------------------------------------------------------------------------------------------------------------------------------------------------------------------------------------------------------------------------------------------------------------------------------------------------------------------------------------------------------------------------------------------|
| GOTERM_BP_ALL | ion homeostasis          | 9  | NM_002032, NM_004174, NM_032591, NM_201413, NM_002983, NM_023035, NM_005072, NM_000146, NM_000702,                                                                                                                                                                                                                                                                                                                                                                                                                                                  |
| GOTERM_BP_ALL | ion transport            | 41 | NM_014861, NM_033323, NM_006476, NM_001002031, NM_001014797, NM_033223, NM_001686, NM_178867, NM_001693, NM_002032, NM_001694, NM_005072, NM_001685, NM_001853, NM_000146, NM_001001977, NM_000702, NM_004366, NM_007100, NM_001005611, NM_023035, NM_006356, NM_000352, NM_152888, NM_152868, NM_002635, NM_138813, NM_004976, NM_004519, NM_001426, NM_004174, NM_001288, NM_032591, NM_000238, NM_016321, NM_005714, NM_001001937, NM_015353, NM_032513, NM_001002258, NM_000093,                                                                |
| GOTERM_MF_ALL | ion transporter activity | 47 | NM_004074, NM_014861, NM_004549, NM_006294, NM_033323, NM_006476, NM_001002031, NM_001014797, NM_033223, NM_004255, NM_001686, NM_178867, NM_001863, NM_001693, NM_001865, NM_002491, NM_001694, NM_005072, NM_001685, NM_001001977, NM_000702, NM_004366, NM_007100, NM_004374, NM_023035, NM_006356, NM_000352, NM_152868, NM_014402, NM_002635, NM_138813, NM_004976, NM_004519, NM_001426, NM_021074, NM_004174, NM_001288, NM_032591, NM_000238, NM_016321, NM_002489, NM_005714, NM_001001937, NM_004541, NM_015353, NM_032513, NM_001002258, |
| GOTERM_MF_ALL | isomerase activity       | 8  | NM_000365, NM_005729, NM_021130, NM_025072, NM_000801, NM_000918, NM_001068, NM_002013,                                                                                                                                                                                                                                                                                                                                                                                                                                                             |
| GOTERM_BP_ALL | JNK cascade              | 5  | NM_033141, NM_212492, NM_005923, NM_015133, NM_005456,                                                                                                                                                                                                                                                                                                                                                                                                                                                                                              |
| GOTERM_BP_ALL | keratinization           | 7  | NM_003125, NM_002705, NM_005987, NM_005988, NM_001017418, NM_006945, NM_003245, NM_005416,                                                                                                                                                                                                                                                                                                                                                                                                                                                          |
| GOTERM_MF_ALL | kinase binding           | 10 | NM_003824, NM_003900, NM_002032, NM_006457, NM_005858, NM_006098, NM_032836, NM_015133, NM_000211, NM_005456,                                                                                                                                                                                                                                                                                                                                                                                                                                       |
| GOTERM_CC_ALL | large ribosomal subunit  | 20 | NM_000985, NM_000971, NM_033625, NM_000980, NM_012423, NM_003973, NM_000990, NM_001004, NM_000992, NM_000983, NM_015414, NM_001033853, NM_000970, NM_001024662, NM_000969, NM_000996, NM_006013, NM_000968, NM_000981, NM_000976, NM_001002,                                                                                                                                                                                                                                                                                                        |
| GOTERM_MF_ALL | lipid binding            | 18 | NM_020548, NM_000700, NM_174897, NM_013416, NM_001002031, NM_004333, NM_006320, NM_007184, NM_181864, NM_152879, NM_006254, NM_020244, NM_001002857, NM_002567, NM_017771, NM_004227, NM_001002258, NM_201533,                                                                                                                                                                                                                                                                                                                                      |

|               |                      |     |                                                                                                                                                                                                                                                                                                                                                                                                                                                                                                                                                                                                                                                                                                                                                                                                                                                                                                                                                                                                                                                                                                                                                                                                                                                                                                 |
|---------------|----------------------|-----|-------------------------------------------------------------------------------------------------------------------------------------------------------------------------------------------------------------------------------------------------------------------------------------------------------------------------------------------------------------------------------------------------------------------------------------------------------------------------------------------------------------------------------------------------------------------------------------------------------------------------------------------------------------------------------------------------------------------------------------------------------------------------------------------------------------------------------------------------------------------------------------------------------------------------------------------------------------------------------------------------------------------------------------------------------------------------------------------------------------------------------------------------------------------------------------------------------------------------------------------------------------------------------------------------|
| GOTERM_BP_ALL | localization         | 159 | NM_052452, NM_178520, NM_022822, NM_000470, NM_000044, NM_005487, NM_005131, NM_152313, NM_002491, NM_002032, NM_001694, NM_201413, NM_002556, NM_006788, NM_002984, NM_207007, NM_007317, NM_181335, NM_005072, NM_025150, NM_002356, NM_207127, NM_007100, NM_002029, NM_001636, NM_013416, NM_199040, NM_145283, NM_152888, NM_152868, NM_138813, NM_000978, NM_004519, NM_000288, NM_001288, NM_001001937, NM_003329, NM_002136, NM_005858, NM_004227, NM_015133, NM_005721, NM_005720, NM_001101, NM_001614, NM_001005377, NM_014453, NM_033323, NM_001014797, NM_033223, NM_001002031, NM_004781, NM_178867, NM_017657, NM_001693, NM_001662, NM_019849, NM_000786, NM_020529, NM_002486, NM_006305, NM_001685, NM_001853, NM_006009, NM_020548, NM_213601, NM_007347, NM_023035, NM_005745, NM_006088, NM_003777, NM_031431, NM_001002258, NM_183235, NM_005456, NM_006822, NM_006082, NM_198829, NM_001024226, NM_000700, NM_001175, NM_004255, NM_198398, NM_001686, NM_001863, NM_052859, NM_001031677, NM_005817, NM_001017998, NM_176812, NM_000146, NM_004366, NM_153292, NM_001005611, NM_018593, NM_181836, NM_006356, NM_000918, NM_014402, NM_006135, NM_002635, NM_004976, NM_003333, NM_005731, NM_152862, NM_021074, NM_016226, NM_001664, NM_000238, NM_005267, NM_002524, |
| GOTERM_BP_ALL | localization of cell | 27  | NM_005720, NM_000700, NM_005206, NM_001101, NM_001614, NM_001005377, NM_001175, NM_006181, NM_002983, NM_002984, NM_207007, NM_181335, NM_000702, NM_002356, NM_002029, NM_006135, NM_003370, NM_003333, NM_000211, NM_005731, NM_152862, NM_002314, NM_004924, NM_002524, NM_003777, NM_003329, NM_001557, NM_000584, NM_005560, NM_005721,                                                                                                                                                                                                                                                                                                                                                                                                                                                                                                                                                                                                                                                                                                                                                                                                                                                                                                                                                    |
| GOTERM_BP_ALL | locomotion           | 27  | NM_005720, NM_000700, NM_005206, NM_001101, NM_001614, NM_001005377, NM_001175, NM_006181, NM_002983, NM_002984, NM_207007, NM_181335, NM_000702, NM_002356, NM_002029, NM_006135, NM_003370, NM_003333, NM_000211, NM_005731, NM_152862, NM_002314, NM_004924, NM_002524, NM_003777, NM_003329, NM_001557, NM_000584, NM_005560, NM_005721,                                                                                                                                                                                                                                                                                                                                                                                                                                                                                                                                                                                                                                                                                                                                                                                                                                                                                                                                                    |
| GOTERM_BP_ALL | locomotory behavior  | 11  | NM_002029, NM_006489, NM_002983, NM_002524, NM_006788, NM_001005377, NM_002984, NM_207007, NM_001511, NM_001557, NM_000584, NM_000211,                                                                                                                                                                                                                                                                                                                                                                                                                                                                                                                                                                                                                                                                                                                                                                                                                                                                                                                                                                                                                                                                                                                                                          |

|               |                            |     |                                                                                                                                                                                                                                                                                                                                                                                                                                                                                                                                                                                                                                                                                                                                                                                                                                                                                                                                                                                                                                                                                                                                                                                                                                                                                                                           |
|---------------|----------------------------|-----|---------------------------------------------------------------------------------------------------------------------------------------------------------------------------------------------------------------------------------------------------------------------------------------------------------------------------------------------------------------------------------------------------------------------------------------------------------------------------------------------------------------------------------------------------------------------------------------------------------------------------------------------------------------------------------------------------------------------------------------------------------------------------------------------------------------------------------------------------------------------------------------------------------------------------------------------------------------------------------------------------------------------------------------------------------------------------------------------------------------------------------------------------------------------------------------------------------------------------------------------------------------------------------------------------------------------------|
| GOTERM_BP_ALL | macromolecule biosynthesis | 105 | <p>XM_371853, NM_000365, NM_001023, XM_927103, NM_000999, NM_001404, NM_001028, NM_001025071, NM_005617, NM_003908, NM_000972, NM_170738, NM_017629, NM_025150, NM_001006, XM_372048, NM_000985, NM_001032, NM_001026, NM_001997, XM_371019, NM_000978, NM_000975, NM_000989, NM_007104, NM_000981, NM_001012, NM_002954, NM_002948, NM_000983, NM_000998, NM_138706, NM_000969, XM_015717, NM_014445, NM_018973, XM_293412, NM_000988, NM_001002, NM_000971, NM_033625, NM_001022, NM_000984, NM_001017, NM_002952, NM_001037663, NM_021029, NM_001009, NM_000994, XM_370611, NM_001402, NM_013234, NM_001005, NM_003896, NM_000996, NM_001015, NM_001025, NM_000976, NM_001014, NM_001000, NM_001004, NM_001012321, NM_001007, NM_024996, NM_015414, NM_006058, NM_002568, NM_004807, NM_003753, NM_000970, NM_001024662, NM_001033853, XM_371023, NM_000973, NM_014180, XM_208185, NM_184041, NM_033251, NM_022551, NM_003333, NM_016219, NM_001011, NM_001031, NM_001001, XM_496442, NM_000986, NM_000980, NM_000992, NM_000661, XM_495839, NM_005801, NM_001035267, NM_001024, XM_058967, NM_152269, NM_001030009, NM_000968, NM_012235, NM_001675, NM_012423, NM_003973, NM_000990, NM_001020, NM_000291, NM_006013, NM_030919, NM_001967, NM_002755, NM_005570, NM_001023, NM_032240, NM_001005275, NM_000999,</p> |
| GOTERM_BP_ALL | macromolecule metabolism   | 259 | <p>NM_194460, NM_021009, NM_032409, NM_002013, NM_001028, NM_003908, NM_018320, NM_014780, NM_017629, NM_005474, XM_372048, NM_001032, NM_002969, NM_006597, XM_371019, NM_013233, NM_152831, NM_006397, NM_014884, NM_000975, NM_006254, NM_007104, NM_015133, NM_212472, NM_001039465, NM_017722, NM_001005377, NM_018282, NM_006304, NM_000983, NM_005609, NM_145046, NM_003245, NM_001015052, NM_018694, NM_000998, NM_005500, NM_003656, NM_018973, NM_013293, NM_005923, XM_293412, NM_000988, NM_033625, NM_001022, NM_018998, NM_005044, NM_001037663, NM_021029, NM_000994, NM_001402, NM_013234, NM_005986, NM_004593, NM_003828, NM_021130, NM_006088, NM_170770, NM_000996, NM_001015, NM_002691, NM_000976, NM_017900, NM_033141, NM_006082, NM_198829, NM_001004, NM_001012321, NM_015414, NM_025264, NM_032188, NM_006646, NM_006058, NM_003753, NM_000970, NM_001024662, NM_001017998, NM_014180, NM_005484, NM_001098, NM_002816, XM_208185, NM_184041, NM_033251, NM_022551, NM_014615, NM_006135, NM_003169, NM_194252, NM_001011, NM_001001, NM_005324, NM_003761, XM_496442, NM_000986, NM_001025204, NM_000980, NM_006384, NM_001641, NM_005620, NM_014370, XM_495839, NM_005566, NM_002800, NM_005801, NM_152269,</p>                                                                              |

|               |                          |     |                                                                                                                                                                                                                                                                                                                                                                                                                                                                                                                                                                                                                                                                                                                                                                                                                                                                                                                                                                                                                                                                                                                                                                                                                                                                                                                                                                                                                                                                                                                                                                                                                                                          |
|---------------|--------------------------|-----|----------------------------------------------------------------------------------------------------------------------------------------------------------------------------------------------------------------------------------------------------------------------------------------------------------------------------------------------------------------------------------------------------------------------------------------------------------------------------------------------------------------------------------------------------------------------------------------------------------------------------------------------------------------------------------------------------------------------------------------------------------------------------------------------------------------------------------------------------------------------------------------------------------------------------------------------------------------------------------------------------------------------------------------------------------------------------------------------------------------------------------------------------------------------------------------------------------------------------------------------------------------------------------------------------------------------------------------------------------------------------------------------------------------------------------------------------------------------------------------------------------------------------------------------------------------------------------------------------------------------------------------------------------|
| GOTERM_MF_ALL | magnesium ion binding    | 18  | NM_014861, NM_005932, NM_002969, NM_004435, NM_001641, NM_015256, NM_199040, NM_001014797, NM_138813, NM_003245, NM_144641, NM_032409, NM_001664, NM_002512, NM_006282, NM_005923, NM_000702, NM_001114, NM_022087, NM_005932, NM_199040, NM_002710, NM_144641, NM_000636, NM_001024466,                                                                                                                                                                                                                                                                                                                                                                                                                                                                                                                                                                                                                                                                                                                                                                                                                                                                                                                                                                                                                                                                                                                                                                                                                                                                                                                                                                 |
| GOTERM_MF_ALL | manganese ion binding    | 6   | NM_015675, NM_002029, NM_033141, NM_212492, NM_032246, NM_005923, NM_015133, NM_005456,                                                                                                                                                                                                                                                                                                                                                                                                                                                                                                                                                                                                                                                                                                                                                                                                                                                                                                                                                                                                                                                                                                                                                                                                                                                                                                                                                                                                                                                                                                                                                                  |
| GOTERM_BP_ALL | MAPKKK cascade           | 8   | NM_004549, NM_015256, NM_181642, NM_005968, NM_001002031, NM_004781, NM_001304, NM_206887, NM_005729, NM_003458, NM_005072, NM_001685, NM_004366, NM_001005611, NM_152831, NM_152868, NM_001795, NM_004976, NM_021999, NM_014723, NM_004519, NM_016219, NM_021074, NM_001288, NM_000238, NM_020244, NM_005714, NM_014300, NM_001001937, NM_004541, NM_006457, NM_004227, NM_003761, NM_001002258,                                                                                                                                                                                                                                                                                                                                                                                                                                                                                                                                                                                                                                                                                                                                                                                                                                                                                                                                                                                                                                                                                                                                                                                                                                                        |
| GOTERM_CC_ALL | membrane fraction        | 34  | NM_005507, NM_000532, NM_178520, NM_005054, NM_000470, NM_017420, NM_003108, NM_000044, NM_018429, NM_001005273, NM_004926, NM_012318, NM_032409, NM_000636, NM_001024466, NM_002013, NM_006606, NM_001694, NM_203374, NM_020956, NM_016311, NM_178190, NM_018320, NM_007317, NM_014780, NM_152414, NM_021167, NM_005474, NM_006597, NM_001636, NM_013233, NM_024700, NM_014884, NM_001288, NM_003295, NM_019084, NM_005858, NM_012482, NM_001039465, NM_016604, NM_001101, NM_001614, NM_002146, NM_005968, NM_145046, NM_032836, NM_178867, NM_001015052, NM_017657, NM_018694, NM_002585, NM_003113, NM_005121, NM_005500, NM_003656, NM_006305, NM_183040, NM_018973, NM_013293, NM_005341, NM_005413, NM_003428, NM_013234, NM_005986, NM_030613, NM_004593, NM_004541, NM_005437, NM_002691, NM_001004333, NM_001002258, NM_018942, NM_013286, NM_001010850, NM_017900, NM_020183, NM_001024226, NM_003487, NM_207395, NM_001012321, NM_001686, NM_015335, NM_025264, NM_205840, NM_032188, NM_001031677, NM_002968, NM_006058, NM_033267, NM_024016, NM_005484, NM_001098, NM_198440, NM_003169, NM_002635, NM_001357, NM_021074, NM_006497, NM_001011, NM_005381, NM_022130, NM_000532, NM_003168, NM_031212, NM_005324, NM_003761, NM_001025204, NM_006423, NM_001641, NM_023067, NM_015256, NM_005335, NM_001432, NM_003487, NM_001101, NM_001614, NM_001436, NM_005347, NM_001015052, NM_016310, NM_003113, NM_012238, NM_001033853, NM_005121, NM_002486, NM_018171, NM_005474, NM_005114, NM_001261, NM_003169, NM_016389, NM_003091, NM_001011, NM_000126, NM_015859, NM_000532, NM_005381, NM_002136, NM_022117, NM_012482, NM_001025204, |
| GOTERM_CC_ALL | membrane-bound organelle | 281 |                                                                                                                                                                                                                                                                                                                                                                                                                                                                                                                                                                                                                                                                                                                                                                                                                                                                                                                                                                                                                                                                                                                                                                                                                                                                                                                                                                                                                                                                                                                                                                                                                                                          |
| GOTERM_CC_ALL | membrane-enclosed lumen  | 29  |                                                                                                                                                                                                                                                                                                                                                                                                                                                                                                                                                                                                                                                                                                                                                                                                                                                                                                                                                                                                                                                                                                                                                                                                                                                                                                                                                                                                                                                                                                                                                                                                                                                          |

|               |                   |     |                                                                                                                                                                                                                                                                                                                                                                                                                                                                                                                                                                                                                                                                                                                                                                                                                                                                                                                                                                                                                                                                                                                                                                                                                                                                                                                                                                                                                                                                                            |
|---------------|-------------------|-----|--------------------------------------------------------------------------------------------------------------------------------------------------------------------------------------------------------------------------------------------------------------------------------------------------------------------------------------------------------------------------------------------------------------------------------------------------------------------------------------------------------------------------------------------------------------------------------------------------------------------------------------------------------------------------------------------------------------------------------------------------------------------------------------------------------------------------------------------------------------------------------------------------------------------------------------------------------------------------------------------------------------------------------------------------------------------------------------------------------------------------------------------------------------------------------------------------------------------------------------------------------------------------------------------------------------------------------------------------------------------------------------------------------------------------------------------------------------------------------------------|
| GOTERM_BP_ALL | metabolism        | 390 | <p>NM_002755, NM_001007555, NM_032240, NM_017420, NM_005100,<br/> NM_001005273, NM_000999, NM_002013, NM_003908, NM_152414, NM_005474,<br/> XM_372048, NM_001032, NM_013233, NM_152831, NM_006397, NM_007104,<br/> NM_032251, NM_012482, NM_212472, NM_017722, NM_002146, NM_018282,<br/> NM_006304, NM_145046, NM_003245, NM_001015052, NM_018694, NM_000998,<br/> NM_005500, NM_003656, NM_013293, XM_293412, NM_000988, NM_005341,<br/> NM_018998, NM_001037663, NM_021029, NM_000994, NM_003428, NM_005986,<br/> NM_003828, NM_001085, NM_021130, NM_004541, NM_000996, NM_001015,<br/> NM_002691, NM_001002258, NM_018942, NM_017900, NM_198829, NM_020183,<br/> NM_001004, NM_001686, NM_015335, NM_025264, NM_015414, NM_032188,<br/> NM_006058, NM_002968, NM_003753, NM_000970, NM_001024662, NM_033267,<br/> NM_005484, NM_153292, NM_006135, NM_003169, NM_002635, NM_021074,<br/> NM_006497, NM_194252, NM_000532, NM_003761, NM_000980, NM_005620,<br/> NM_005566, NM_002800, NM_001865, NM_005801, NM_001024, XM_058967,<br/> NM_000312, NM_000433, NM_002046, NM_012238, NM_005194, NM_145897,<br/> NM_012235, NM_138454, NM_012423, NM_004333, NM_001426, NM_002314,<br/> NM_138632, NM_006357, NM_015859, NM_144683, NM_017771, NM_000160,<br/> NM_020649, NM_014496, XM_371853, NM_031844, NM_173176, NM_001025071,<br/> NM_005617, NM_002953, NM_002556, NM_016406, NM_181652, NM_004267,<br/> NM_032240, NM_000470, NM_000044, NM_005547, NM_005487, NM_001005273,</p> |
| GOTERM_MF_ALL | metal ion binding | 151 | <p>NM_004926, NM_194460, NM_012318, NM_032409, NM_000636, NM_001024466,<br/> NM_002032, NM_145699, NM_001694, NM_201413, NM_203374, NM_001623,<br/> NM_004847, NM_003908, NM_018320, NM_019554, NM_201998, NM_005072,<br/> NM_001312, NM_130901, NM_025150, NM_201533, NM_007100, NM_020860,<br/> NM_002969, NM_022486, NM_001064, NM_199040, NM_152831, NM_152868,<br/> NM_138813, NM_144641, NM_004519, NM_006397, NM_006254, NM_006635,<br/> NM_003295, NM_001001937, NM_021019, NM_079423, NM_005858, NM_012482,<br/> NM_002964, NM_017722, NM_001014797, NM_145046, NM_003245, NM_032836,<br/> NM_178867, NM_001693, NM_000200, NM_003113, NM_000786, NM_000998,<br/> NM_002598, NM_005923, NM_001001483, NM_033546, NM_001114, NM_022087,<br/> NM_005341, NM_023035, NM_002581, NM_003428, NM_030613, NM_138769,<br/> NM_052978, NM_170770, NM_006457, NM_002691, NM_003810, NM_001010850,<br/> NM_000700, NM_003487, NM_004255, NM_207395, NM_005184, NM_002966,<br/> NM_001686, NM_005576, NM_016190, NM_032188, NM_003247, NM_002968,<br/> NM_032876, NM_207171, NM_015906, NM_001964, NM_006282, NM_000146,<br/> NM_001098, NM_002298, NM_153292, NM_002710, NM_014615, NM_001795,<br/> NM_004976, NM_003453, NM_016219, NM_024329, NM_021074, NM_006497,<br/> NM_001664, NM_003407, NM_000238, NM_022118, NM_015457, NM_003168,</p>                                                                                                                                             |

|               |                                        |    |                                                                                                                                                                                                                                                                                                                                                                                                                                                                                                                                                                                                 |
|---------------|----------------------------------------|----|-------------------------------------------------------------------------------------------------------------------------------------------------------------------------------------------------------------------------------------------------------------------------------------------------------------------------------------------------------------------------------------------------------------------------------------------------------------------------------------------------------------------------------------------------------------------------------------------------|
| GOTERM_BP_ALL | metal ion transport                    | 20 | NM_014861, NM_023035, NM_000352, NM_001014797, NM_152868, NM_178867, NM_004976, NM_004519, NM_001426, NM_002032, NM_004174, NM_001288, NM_032591, NM_000238, NM_005714, NM_015353, NM_032513, NM_005072, NM_000146, NM_000702,                                                                                                                                                                                                                                                                                                                                                                  |
| GOTERM_MF_ALL | metal ion transporter activity         | 8  | NM_002491, NM_021074, NM_004549, NM_014861, NM_032591, NM_002489, NM_004541, NM_000352,                                                                                                                                                                                                                                                                                                                                                                                                                                                                                                         |
| GOTERM_CC_ALL | microbody                              | 5  | NM_016518, NM_000288, NM_015256, NM_181652, NM_207127,                                                                                                                                                                                                                                                                                                                                                                                                                                                                                                                                          |
| GOTERM_CC_ALL | microtubule                            | 11 | NM_006082, NM_022822, NM_020238, NM_006088, NM_007317, NM_004607, NM_003777, NM_006009, NM_001037494, NM_004434, NM_003388,                                                                                                                                                                                                                                                                                                                                                                                                                                                                     |
| GOTERM_CC_ALL | mitochondrial electron transport chain | 7  | NM_004074, NM_004549, NM_006294, NM_004255, NM_014402, NM_001863, NM_001865,                                                                                                                                                                                                                                                                                                                                                                                                                                                                                                                    |
| GOTERM_CC_ALL | mitochondrial envelope                 | 20 | NM_004074, NM_004549, NM_178526, NM_015256, NM_001636, NM_006294, NM_001002031, NM_004255, NM_014402, NM_002635, NM_001686, NM_001863, NM_021960, NM_001865, NM_021074, NM_001001937, NM_001685, NM_031212, NM_001001977, NM_001002258,                                                                                                                                                                                                                                                                                                                                                         |
| GOTERM_CC_ALL | mitochondrial inner membrane           | 18 | NM_004549, NM_004074, NM_178526, NM_001636, NM_006294, NM_001002031, NM_014402, NM_004255, NM_002635, NM_001686, NM_001863, NM_001865, NM_021074, NM_001001937, NM_001685, NM_031212, NM_001001977, NM_001002258,                                                                                                                                                                                                                                                                                                                                                                               |
| GOTERM_CC_ALL | mitochondrial membrane                 | 20 | NM_004074, NM_004549, NM_178526, NM_015256, NM_001636, NM_006294, NM_001002031, NM_004255, NM_014402, NM_002635, NM_001686, NM_001863, NM_021960, NM_001865, NM_021074, NM_001001937, NM_001685, NM_031212, NM_001001977, NM_001002258,                                                                                                                                                                                                                                                                                                                                                         |
| GOTERM_CC_ALL | mitochondrion                          | 49 | NM_178526, NM_006476, NM_004255, NM_001686, NM_001863, NM_024996, NM_012318, NM_000636, NM_001024466, NM_032409, NM_002491, NM_016311, NM_178190, NM_170738, NM_181652, NM_001098, NM_007100, NM_001636, NM_006356, NM_014402, NM_002635, NM_021074, NM_181864, NM_001001937, NM_002489, NM_000532, NM_031212, NM_004549, NM_004074, NM_005932, NM_000018, NM_015256, NM_006294, NM_001002031, NM_178867, NM_021960, NM_001865, NM_005729, NM_198080, NM_001685, NM_001001977, NM_005589, NM_022120, NM_004435, NM_004374, NM_005345, NM_004541, NM_000126, NM_006013, NM_001002258, NM_019059, |

|               |                                                  |    |                                                                                                                                                                                                                                                                                                                                                                                                                                                                                     |
|---------------|--------------------------------------------------|----|-------------------------------------------------------------------------------------------------------------------------------------------------------------------------------------------------------------------------------------------------------------------------------------------------------------------------------------------------------------------------------------------------------------------------------------------------------------------------------------|
| GOTERM_MF_ALL | molecular function unknown                       | 39 | NM_006076, NM_018210, NM_001010850, NM_014453, NM_006181, NM_207422, NM_181870, NM_025187, NM_201535, NM_025264, NM_205840, NM_001024, NM_006617, NM_145699, NM_001007524, NM_004894, NM_153649, NM_020956, NM_001623, NM_004847, NM_176812, NM_002723, NM_014329, NM_015710, NM_001997, NM_006930, NM_003897, NM_015714, NM_006472, NM_001017418, NM_006945, NM_016399, NM_032012, NM_006010, NM_021029, NM_016226, NM_003295, NM_025241, NM_170770, NM_004069, NM_018434,         |
| GOTERM_BP_ALL | monosaccharide catabolism                        | 6  | NM_006755, NM_000365, NM_000291, NM_002046, NM_184041, NM_005566, NM_014861, NM_006476, NM_001014797, NM_001002031, NM_001686,                                                                                                                                                                                                                                                                                                                                                      |
| GOTERM_BP_ALL | monovalent inorganic cation transport            | 25 | NM_001693, NM_001694, NM_005072, NM_001685, NM_001001977, NM_000702, NM_007100, NM_000352, NM_006356, NM_152868, NM_004976, NM_004519, NM_001426, NM_032591, NM_004174, NM_000238, NM_001001937, NM_005714, NM_015353, NM_001002258,                                                                                                                                                                                                                                                |
| GOTERM_MF_ALL | monovalent inorganic cation transporter activity | 27 | NM_004549, NM_004074, NM_006476, NM_006294, NM_001002031, NM_004255, NM_001686, NM_001863, NM_001865, NM_001693, NM_002491, NM_001694, NM_001685, NM_001001977, NM_000702, NM_007100, NM_004374, NM_000352, NM_006356, NM_014402, NM_021074, NM_004174, NM_032591, NM_001001937, NM_002489, NM_004541, NM_001002258,                                                                                                                                                                |
| GOTERM_BP_ALL | morphogenesis                                    | 34 | NM_198829, NM_001007553, NM_017420, NM_006304, NM_031917, NM_006181, NM_000044, NM_181870, NM_003245, NM_205840, NM_152879, NM_002968, NM_006291, NM_002984, NM_207007, NM_014780, NM_003987, NM_000424, NM_002272, NM_199187, NM_003897, NM_004333, NM_000211, NM_003333, NM_001426, NM_003260, NM_020244, NM_002524, NM_020530, NM_006357, NM_005437, NM_006457, NM_000584, NM_022117, NM_005245, NM_005560, NM_001039465, NM_030979, NM_018282, NM_005131, NM_014884, NM_004593, |
| GOTERM_BP_ALL | mRNA metabolism                                  | 18 | NM_002568, NM_003407, NM_005345, NM_003091, NM_002486, NM_004643, NM_201998, NM_013293, NM_002136, NM_031266, NM_001007229, NM_001025204,                                                                                                                                                                                                                                                                                                                                           |
| GOTERM_BP_ALL | mRNA processing                                  | 14 | NM_001039465, NM_018282, NM_005131, NM_014884, NM_004593, NM_002568, NM_003091, NM_002486, NM_004643, NM_201998, NM_013293, NM_002136, NM_001007229, NM_001025204,                                                                                                                                                                                                                                                                                                                  |
| GOTERM_BP_ALL | muscle contraction                               | 8  | NM_000238, NM_153649, NM_184041, NM_004643, NM_021019, NM_079423, NM_001014797, NM_000256, NM_033546,                                                                                                                                                                                                                                                                                                                                                                               |
| GOTERM_BP_ALL | muscle development                               | 6  | NM_003564, NM_002969, NM_012238, NM_021019, NM_079423, NM_003333, NM_005474,                                                                                                                                                                                                                                                                                                                                                                                                        |



|               |                                                       |    |                                                                                                                                                                                                                                                                                                                                                                                                                                                                                                                                                                                                                                                            |
|---------------|-------------------------------------------------------|----|------------------------------------------------------------------------------------------------------------------------------------------------------------------------------------------------------------------------------------------------------------------------------------------------------------------------------------------------------------------------------------------------------------------------------------------------------------------------------------------------------------------------------------------------------------------------------------------------------------------------------------------------------------|
| GOTERM_MF_ALL | NADH dehydrogenase (quinone) activity                 | 5  | NM_002491, NM_021074, NM_004549, NM_002489, NM_004541,                                                                                                                                                                                                                                                                                                                                                                                                                                                                                                                                                                                                     |
| GOTERM_MF_ALL | NADH dehydrogenase (ubiquinone) activity              | 5  | NM_002491, NM_021074, NM_004549, NM_002489, NM_004541,                                                                                                                                                                                                                                                                                                                                                                                                                                                                                                                                                                                                     |
| GOTERM_MF_ALL | NADH dehydrogenase activity                           | 5  | NM_002491, NM_021074, NM_004549, NM_002489, NM_004541,                                                                                                                                                                                                                                                                                                                                                                                                                                                                                                                                                                                                     |
| GOTERM_BP_ALL | negative regulation of apoptosis                      | 11 | NM_007308, NM_005507, NM_000312, NM_004323, NM_005345, NM_000700,<br>NM_003295, NM_003897, NM_004333, NM_005347, NM_021960,                                                                                                                                                                                                                                                                                                                                                                                                                                                                                                                                |
| GOTERM_BP_ALL | negative regulation of biological process             | 52 | NM_005507, NM_017900, NM_198829, NM_212492, NM_000700, NM_001175,<br>NM_001511, NM_005347, NM_205840, NM_002032, NM_006058, NM_001623,<br>NM_004847, NM_016311, NM_178190, NM_015906, NM_003927, NM_005474,<br>NM_000424, NM_002272, NM_002969, NM_004323, NM_003897, NM_014517,<br>NM_006135, NM_003169, NM_006497, NM_003295, NM_006763, NM_012482,<br>NM_007308, NM_015094, NM_005620, NM_014781, NM_021960, NM_000312,<br>NM_020529, NM_012238, NM_153232, NM_001800, NM_002512, NM_012235,<br>NM_003641, NM_001009181, NM_012090, NM_005938, NM_004333, NM_019001,<br>NM_005345, NM_138632, NM_000576, NM_020530, NM_000584, NM_002923,<br>NM_022117, |
| GOTERM_BP_ALL | negative regulation of cell proliferation             | 14 | NM_003641, NM_000424, NM_002272, NM_005620, NM_005938, NM_001511,<br>NM_205840, NM_002032, NM_001623, NM_004847, NM_000576, NM_001800,<br>NM_020530, NM_002512, NM_000584, NM_006763,                                                                                                                                                                                                                                                                                                                                                                                                                                                                      |
| GOTERM_BP_ALL | negative regulation of cellular metabolism            | 13 | NM_014517, NM_015094, NM_005620, NM_003169, NM_012238, NM_153232,<br>NM_016311, NM_178190, NM_015906, NM_003927, NM_022117, NM_012482,<br>NM_012235, NM_005474,                                                                                                                                                                                                                                                                                                                                                                                                                                                                                            |
| GOTERM_BP_ALL | negative regulation of cellular physiological process | 47 | NM_007308, NM_005507, NM_017900, NM_198829, NM_000700, NM_015094,<br>NM_005620, NM_014781, NM_001511, NM_005347, NM_021960, NM_205840,<br>NM_000312, NM_002032, NM_020529, NM_012238, NM_016311, NM_178190,<br>NM_001623, NM_004847, NM_153232, NM_001800, NM_015906, NM_002512,<br>NM_003927, NM_005474, NM_012235, NM_000424, NM_002272, NM_003641,<br>NM_004323, NM_002969, NM_003897, NM_014517, NM_012090, NM_005938,<br>NM_004333, NM_003169, NM_006135, NM_019001, NM_006497, NM_005345,<br>NM_138632, NM_003295, NM_000576, NM_020530, NM_000584, NM_022117,<br>NM_006763, NM_012482,                                                              |

|               |                                                                                       |    |                                                                                                                                                                                                                                                                                                                                                                                                                                                                                                                                                                                             |
|---------------|---------------------------------------------------------------------------------------|----|---------------------------------------------------------------------------------------------------------------------------------------------------------------------------------------------------------------------------------------------------------------------------------------------------------------------------------------------------------------------------------------------------------------------------------------------------------------------------------------------------------------------------------------------------------------------------------------------|
| GOTERM_BP_ALL | negative regulation of cellular process                                               | 49 | NM_005507, NM_017900, NM_198829, NM_000700, NM_001175, NM_001511, NM_005347, NM_205840, NM_002032, NM_001623, NM_004847, NM_016311, NM_178190, NM_015906, NM_003927, NM_005474, NM_000424, NM_002272, NM_002969, NM_004323, NM_003897, NM_014517, NM_006135, NM_003169, NM_006497, NM_003295, NM_006763, NM_012482, NM_007308, NM_015094, NM_005620, NM_014781, NM_021960, NM_000312, NM_020529, NM_012238, NM_153232, NM_001800, NM_002512, NM_012235, NM_003641, NM_012090, NM_005938, NM_004333, NM_019001, NM_005345, NM_000576, NM_138632, NM_020530, NM_000584, NM_002923, NM_022117, |
| GOTERM_BP_ALL | negative regulation of metabolism                                                     | 15 | NM_014517, NM_015094, NM_005620, NM_006135, NM_003169, NM_012238, NM_016311, NM_178190, NM_138632, NM_153232, NM_015906, NM_003927, NM_022117, NM_012482, NM_012235, NM_005474,                                                                                                                                                                                                                                                                                                                                                                                                             |
| GOTERM_BP_ALL | negative regulation of nucleobase, nucleoside, nucleotide and nucleic acid metabolism | 12 | NM_012238, NM_016311, NM_178190, NM_153232, NM_015906, NM_015094, NM_014517, NM_005620, NM_003169, NM_003927, NM_022117, NM_012482, NM_005474,                                                                                                                                                                                                                                                                                                                                                                                                                                              |
| GOTERM_BP_ALL | negative regulation of physiological process                                          | 48 | NM_007308, NM_005507, NM_017900, NM_198829, NM_000700, NM_015094, NM_005620, NM_014781, NM_001511, NM_005347, NM_021960, NM_205840, NM_000312, NM_002032, NM_020529, NM_012238, NM_016311, NM_178190, NM_001623, NM_004847, NM_153232, NM_001800, NM_015906, NM_002512, NM_003927, NM_005474, NM_012235, NM_000424, NM_002272, NM_003641, NM_004323, NM_002969, NM_001009181, NM_003897, NM_014517, NM_012090, NM_005938, NM_004333, NM_003169, NM_006135, NM_019001, NM_006497, NM_005345, NM_138632, NM_003295, NM_000576, NM_020530, NM_000584, NM_022117, NM_006763, NM_012482,         |
| GOTERM_BP_ALL | negative regulation of programmed cell death                                          | 11 | NM_007308, NM_005507, NM_000312, NM_004323, NM_005345, NM_000700, NM_003295, NM_003897, NM_004333, NM_005347, NM_021960,                                                                                                                                                                                                                                                                                                                                                                                                                                                                    |
| GOTERM_BP_ALL | negative regulation of progression through cell cycle                                 | 12 | NM_006497, NM_017900, NM_002969, NM_001623, NM_004847, NM_001800, NM_002512, NM_012090, NM_005938, NM_014781, NM_000584, NM_019001, NM_022117,                                                                                                                                                                                                                                                                                                                                                                                                                                              |
| GOTERM_BP_ALL | negative regulation of transcription                                                  | 9  | NM_012238, NM_153232, NM_015906, NM_015094, NM_014517, NM_003169, NM_003927, NM_012482, NM_005474,                                                                                                                                                                                                                                                                                                                                                                                                                                                                                          |

|               |                                        |     |                                                                                                                                                                                                                                                                                                                                                                                                                                                                                                                                                                                                                                                                                                                                                                                                                                                                                                                                                                                                                                                                                                                                                                                                                                                                                                      |
|---------------|----------------------------------------|-----|------------------------------------------------------------------------------------------------------------------------------------------------------------------------------------------------------------------------------------------------------------------------------------------------------------------------------------------------------------------------------------------------------------------------------------------------------------------------------------------------------------------------------------------------------------------------------------------------------------------------------------------------------------------------------------------------------------------------------------------------------------------------------------------------------------------------------------------------------------------------------------------------------------------------------------------------------------------------------------------------------------------------------------------------------------------------------------------------------------------------------------------------------------------------------------------------------------------------------------------------------------------------------------------------------|
| GOTERM_BP_ALL | nervous system development             | 26  | NM_007308, NM_032108, NM_005634, NM_014279, NM_003108, NM_006181, NM_001511, NM_206887, NM_205840, NM_057091, NM_002585, NM_006617, NM_020956, NM_003025, NM_003656, NM_014548, NM_003987, NM_004114, NM_005413, NM_023035, NM_000263, NM_003333, NM_021999, NM_021074, NM_002314, NM_014496,                                                                                                                                                                                                                                                                                                                                                                                                                                                                                                                                                                                                                                                                                                                                                                                                                                                                                                                                                                                                        |
| GOTERM_BP_ALL | neurogenesis                           | 6   | NM_057091, NM_020956, NM_006181, NM_003987, NM_003333, NM_205840,                                                                                                                                                                                                                                                                                                                                                                                                                                                                                                                                                                                                                                                                                                                                                                                                                                                                                                                                                                                                                                                                                                                                                                                                                                    |
| GOTERM_BP_ALL | neuron development                     | 5   | NM_020956, NM_006181, NM_003987, NM_003333, NM_205840,                                                                                                                                                                                                                                                                                                                                                                                                                                                                                                                                                                                                                                                                                                                                                                                                                                                                                                                                                                                                                                                                                                                                                                                                                                               |
| GOTERM_CC_ALL | non-membrane-bound organelle           | 165 | NM_005307, XM_371833, NM_005034, NM_001023, NM_022822, NM_173170, XM_927103, NM_005487, NM_001005273, NM_000999, NM_001028, NM_001025071, NM_005617, NM_153649, NM_000972, NM_003908, NM_005988, NM_007317, NM_201998, NM_170738, NM_014548, NM_002356, NM_199187, NM_000985, XM_372048, NM_001006, NM_000424, NM_002272, NM_001032, NM_001026, NM_001997, XM_371019, NM_000978, NM_003388, NM_000975, NM_002284, NM_000989, NM_004693, NM_021019, NM_079423, NM_007104, NM_001068, NM_000981, NM_001013699, NM_005721, NM_001012, NM_002954, NM_000526, NM_003290, NM_003125, NM_000226, NM_005720, NM_001101, NM_001614, NM_002948, NM_000983, NM_057088, NM_003245, NM_006617, NM_003113, NM_002274, NM_153490, NM_000998, NM_020238, NM_000969, NM_002276, XM_015717, NM_014445, NM_006009, XM_293412, NM_000988, NM_033546, NM_001002, NM_000971, NM_033625, NM_001022, NM_000984, NM_001017, NM_001017418, NM_006945, NM_002952, NM_001037494, NM_021029, NM_001009, XM_370611, NM_000994, NM_001005, NM_173086, NM_006088, NM_000996, NM_003777, NM_001015, NM_001025, NM_000976, NM_022117, NM_001014, NM_021109, NM_006082, NM_001000, NM_005555, NM_021046, NM_000421, NM_001004, NM_001175, NM_001012321, NM_001007, NM_015414, NM_032188, NM_006646, XM_293312, NM_001033853, NM_000970, |
| GOTERM_CC_ALL | nuclear lumen                          | 25  | NM_005335, NM_001452, NM_003487, NM_001101, NM_001614, NM_001436, NM_001015052, NM_016310, NM_003113, NM_012238, NM_001033853, NM_005121, NM_002486, NM_018171, NM_005474, NM_001261, NM_003169, NM_016389, NM_003091, NM_001011, NM_015859, NM_005381, NM_002136, NM_022117, NM_012482, NM_001025204,                                                                                                                                                                                                                                                                                                                                                                                                                                                                                                                                                                                                                                                                                                                                                                                                                                                                                                                                                                                               |
| GOTERM_BP_ALL | nuclear mRNA splicing, via spliceosome | 9   | NM_014884, NM_004593, NM_001039465, NM_003091, NM_018282, NM_201998, NM_013293, NM_005131, NM_001025204,                                                                                                                                                                                                                                                                                                                                                                                                                                                                                                                                                                                                                                                                                                                                                                                                                                                                                                                                                                                                                                                                                                                                                                                             |
| GOTERM_BP_ALL | nuclear transport                      | 7   | NM_001664, NM_020529, NM_002486, NM_199040, NM_002136, NM_005131, NM_000978,                                                                                                                                                                                                                                                                                                                                                                                                                                                                                                                                                                                                                                                                                                                                                                                                                                                                                                                                                                                                                                                                                                                                                                                                                         |

|               |                                      |     |                                                                                                                                                                                                                                                                                                                                                                                                                                                                                                                                                                                                                                                                                                                                                                                                                                                                                                                                                                                                                                                                                                                                                                                                                                          |
|---------------|--------------------------------------|-----|------------------------------------------------------------------------------------------------------------------------------------------------------------------------------------------------------------------------------------------------------------------------------------------------------------------------------------------------------------------------------------------------------------------------------------------------------------------------------------------------------------------------------------------------------------------------------------------------------------------------------------------------------------------------------------------------------------------------------------------------------------------------------------------------------------------------------------------------------------------------------------------------------------------------------------------------------------------------------------------------------------------------------------------------------------------------------------------------------------------------------------------------------------------------------------------------------------------------------------------|
|               |                                      |     | NM_051844, NM_014405, NM_000485, NM_005054, NM_001007555, NM_052240, NM_004559, NM_017420, NM_003108, NM_000044, NM_005487, NM_018429, NM_001005273, NM_005131, NM_004926, NM_001404, NM_203374, NM_003908, NM_007317, NM_201998, NM_003927, NM_002971, NM_021167, NM_003987, NM_130901, NM_017629, NM_000985, XM_371019, NM_014517, NM_006397, NM_014884, NM_000975, NM_006635, NM_002136, NM_001068, NM_005858, NM_000981, NM_001013699, NM_032251, NM_012482, NM_005335, NM_001039465, NM_001452, NM_017722, NM_002146, NM_018282, NM_005968, NM_000983, NM_032836, NM_001015052, NM_002585, NM_003113, NM_002486, NM_004643, NM_000969, NM_002598, NM_013293, NM_001002, NM_000971, NM_033625, NM_005341, NM_014213, NM_001022, NM_006930, NM_000984, NM_005413, NM_020690, NM_002952, NM_001037663, NM_001009, NM_001402, NM_003428, NM_000843, NM_005986, NM_013234, NM_001005, NM_030613, NM_004593, NM_001085, NM_000996, NM_172027, NM_001015, NM_002691, NM_031266, NM_000976, NM_022117, NM_018942, NM_013286, NM_001010850, NM_001014, NM_002432, NM_020183, NM_003487, NM_001004, NM_207395, NM_001007, NM_024996, NM_025264, XM_293312, NM_002568, NM_002968, NM_001033853, NM_207171, NM_003753, NM_000970, NM_001024662, |
| GOTERM_MF_ALL | nucleic acid binding                 | 163 | NM_015906, NM_001964, NM_033267, NM_000973, NM_024016, NM_005484, NM_001664, NM_020529, NM_002486, NM_006305, NM_199040, NM_002136, NM_005131, NM_000978,                                                                                                                                                                                                                                                                                                                                                                                                                                                                                                                                                                                                                                                                                                                                                                                                                                                                                                                                                                                                                                                                                |
| GOTERM_BP_ALL | nucleocytoplasmic transport          | 8   | NM_005335, NM_001452, NM_001101, NM_001614, NM_003487, NM_001261, NM_003169, NM_001015052, NM_016310, NM_016389, NM_003113, NM_005121, NM_012238, NM_002486, NM_015859, NM_002136, NM_018171, NM_012482, NM_001025204, NM_005474,                                                                                                                                                                                                                                                                                                                                                                                                                                                                                                                                                                                                                                                                                                                                                                                                                                                                                                                                                                                                        |
| GOTERM_CC_ALL | nucleoplasm                          | 19  | NM_007100, NM_006476, NM_006356, NM_001002031, NM_001686, NM_001693, NM_001694, NM_001001937, NM_002512, NM_001685, NM_003987, NM_001001977, NM_001002258,                                                                                                                                                                                                                                                                                                                                                                                                                                                                                                                                                                                                                                                                                                                                                                                                                                                                                                                                                                                                                                                                               |
| GOTERM_BP_ALL | nucleoside triphosphate biosynthesis | 13  | NM_007100, NM_006476, NM_006356, NM_001002031, NM_001686, NM_001693, NM_001694, NM_001001937, NM_002512, NM_001685, NM_003987, NM_001001977, NM_001002258,                                                                                                                                                                                                                                                                                                                                                                                                                                                                                                                                                                                                                                                                                                                                                                                                                                                                                                                                                                                                                                                                               |
| GOTERM_BP_ALL | nucleoside triphosphate metabolism   | 13  | NM_014861, NM_006082, NM_198829, NM_001024226, NM_006476, NM_024045, NM_001002031, NM_001686, NM_001005273, NM_003245, NM_001693, NM_001662, NM_006270, NM_001694, NM_001017998, NM_001665, NM_001685, NM_006009, NM_001001977, NM_002872, NM_000702, NM_007100, NM_006597, NM_006356, NM_000352, NM_138813, NM_001271, NM_001402, NM_001357, NM_001664, NM_001001937, NM_002524, NM_021033, NM_006088, NM_003777, NM_001002258, NM_001967, NM_183235,                                                                                                                                                                                                                                                                                                                                                                                                                                                                                                                                                                                                                                                                                                                                                                                   |
| GOTERM_MF_ALL | nucleoside-triphosphatase activity   | 38  |                                                                                                                                                                                                                                                                                                                                                                                                                                                                                                                                                                                                                                                                                                                                                                                                                                                                                                                                                                                                                                                                                                                                                                                                                                          |

|               |                             |     |                                                                                                                                                                                                                                                                                                                                                                                                                                                                                                                                                                                                                                                                                                                                                                                                                                                                                                                                                                                                                                                                                                                                                                                                                                                  |
|---------------|-----------------------------|-----|--------------------------------------------------------------------------------------------------------------------------------------------------------------------------------------------------------------------------------------------------------------------------------------------------------------------------------------------------------------------------------------------------------------------------------------------------------------------------------------------------------------------------------------------------------------------------------------------------------------------------------------------------------------------------------------------------------------------------------------------------------------------------------------------------------------------------------------------------------------------------------------------------------------------------------------------------------------------------------------------------------------------------------------------------------------------------------------------------------------------------------------------------------------------------------------------------------------------------------------------------|
|               |                             |     | NM_021205, NM_005570, NM_014405, NM_051844, NM_175170, NM_005547, NM_001005273, NM_032409, NM_002953, NM_007317, NM_003927, NM_002872, NM_003987, NM_025150, NM_201533, NM_002969, NM_006597, NM_013233, NM_001261, NM_138813, NM_006254, NM_001001937, NM_001068, NM_002136, NM_005721, NM_212472, NM_001039465, NM_001101, NM_001614, NM_018282, NM_005968, NM_005609, NM_003245, NM_001693, NM_001662, NM_020812, NM_003656, NM_004643, NM_013293, NM_006009, NM_005923, NM_175571, NM_000984, NM_005044, NM_007355, NM_001402, NM_004593, NM_138769, NM_006088, NM_003777, NM_002691, NM_031266, NM_183235, NM_006822, NM_001010850, NM_013286, NM_006082, NM_198829, NM_033141, NM_001024226, NM_003487, NM_001686, NM_024996, NM_006270, NM_002568, NM_001031677, NM_002567, NM_001017998, NM_001665, NM_006282, NM_012393, NM_153292, NM_001357, NM_001664, NM_022118, NM_002524, NM_005381, NM_012334, NM_021168, NM_001025204, NM_014861, NM_002747, NM_148977, NM_139062, NM_007285, NM_024045, NM_014370, NM_003718, NM_002512, NM_000702, NM_004566, NM_030979, NM_000352, NM_015076, NM_004333, NM_001271, NM_002314, NM_000291, NM_194247, NM_001280, NM_005345, NM_021033, NM_017771, NM_016732, NM_030919, NM_001967, NM_014496, |
| GOTERM_MF_ALL | nucleotide binding          | 106 |                                                                                                                                                                                                                                                                                                                                                                                                                                                                                                                                                                                                                                                                                                                                                                                                                                                                                                                                                                                                                                                                                                                                                                                                                                                  |
| GOTERM_BP_ALL | nucleotide biosynthesis     | 16  | NM_007100, NM_005746, NM_006476, NM_006356, NM_001002031, NM_001686, NM_001693, NM_001694, NM_001001937, NM_002512, NM_001685, NM_001001977, NM_003987, NM_001002258, NM_001114, NM_012393, NM_007100, NM_005746, NM_006755, NM_000365, NM_006476, NM_199040, NM_006356, NM_001002031, NM_001686, NM_001693, NM_001694, NM_001001937, NM_002512, NM_001685, NM_001001977, NM_003987, NM_005589, NM_001002258, NM_001114, NM_012393,                                                                                                                                                                                                                                                                                                                                                                                                                                                                                                                                                                                                                                                                                                                                                                                                              |
| GOTERM_BP_ALL | nucleotide metabolism       | 20  |                                                                                                                                                                                                                                                                                                                                                                                                                                                                                                                                                                                                                                                                                                                                                                                                                                                                                                                                                                                                                                                                                                                                                                                                                                                  |
| GOTERM_MF_ALL | obsolete molecular function | 29  | NM_007308, NM_002799, NM_004074, NM_006476, NM_001002031, NM_004255, NM_001686, NM_001863, NM_002800, NM_016310, NM_001865, NM_001693, NM_002013, NM_000312, NM_201413, NM_001694, NM_005729, NM_001685, NM_000146, NM_001001977, NM_007100, NM_004374, NM_006356, NM_002727, NM_000576, NM_001001937, NM_021130, NM_000801, NM_001002258,                                                                                                                                                                                                                                                                                                                                                                                                                                                                                                                                                                                                                                                                                                                                                                                                                                                                                                       |
| GOTERM_BP_ALL | organ development           | 28  | NM_001007553, NM_031917, NM_000044, NM_181870, NM_000200, NM_002585, NM_012238, NM_001002857, NM_006291, NM_014780, NM_005474, NM_002969, NM_020860, NM_001022, NM_001009181, NM_005413, NM_004333, NM_003333, NM_002959, NM_001426, NM_003564, NM_003260, NM_002524, NM_021019, NM_079423, NM_005437, NM_006457, NM_000584, NM_005560,                                                                                                                                                                                                                                                                                                                                                                                                                                                                                                                                                                                                                                                                                                                                                                                                                                                                                                          |

|               |                          |     |                                                                                                                                                                                                                                                                                                                                                                                                                                                                                                                                                                                                                                                                                                                                                                                                                                                                                                                                                                                                                                                                                                                                                                                                                                            |
|---------------|--------------------------|-----|--------------------------------------------------------------------------------------------------------------------------------------------------------------------------------------------------------------------------------------------------------------------------------------------------------------------------------------------------------------------------------------------------------------------------------------------------------------------------------------------------------------------------------------------------------------------------------------------------------------------------------------------------------------------------------------------------------------------------------------------------------------------------------------------------------------------------------------------------------------------------------------------------------------------------------------------------------------------------------------------------------------------------------------------------------------------------------------------------------------------------------------------------------------------------------------------------------------------------------------------|
| GOTERM_BP_ALL | organ morphogenesis      | 12  | NM_003260, NM_001007553, NM_002524, NM_006291, NM_031917, NM_014780, NM_006457, NM_004333, NM_005437, NM_000584, NM_181870, NM_005560, NM_000532, NM_178526, NM_017420, NM_005108, NM_001005273, NM_000999,                                                                                                                                                                                                                                                                                                                                                                                                                                                                                                                                                                                                                                                                                                                                                                                                                                                                                                                                                                                                                                |
| GOTERM_CC_ALL | organelle                | 408 | NM_012318, NM_002013, NM_203374, NM_020956, NM_003908, NM_007317, NM_152414, NM_002356, NM_005474, XM_372048, NM_000424, NM_002272, NM_001032, NM_013233, NM_024700, NM_019084, NM_007104, NM_005858, NM_012482, NM_003290, NM_003125, NM_016604, NM_001101, NM_001614, NM_002146, NM_005968, NM_145046, NM_003245, NM_001015052, NM_018694, NM_006617, NM_000998, NM_005500, NM_003656, NM_006305, NM_183040, NM_013293, XM_293412, NM_000988, NM_005341, NM_021029, NM_000994, NM_003428, NM_005986, NM_030613, NM_004541, NM_000996, NM_001015, NM_002691, NM_001004333, NM_001002258, NM_018942, NM_001010850, NM_017900, NM_020183, NM_001024226, NM_003487, NM_000421, NM_001004, NM_001686, NM_015335, NM_015414, NM_025264, NM_205840, NM_032188, NM_006058, NM_002968, NM_000970, NM_001024662, NM_033267, NM_021103, NM_005484, NM_006135, NM_003169, NM_002635, NM_001357, NM_021074, NM_173352, NM_006497, NM_001664, NM_022130, NM_000532, NM_012334, NM_003761, NM_000980, NM_003003, NM_005620, NM_001865, NM_001024, NM_020357, NM_012238, NM_005194, NM_145897, NM_012235, NM_012423, NM_002705, NM_004729, NM_019001, NM_001426, NM_004924, NM_138632, NM_006357, NM_015859, NM_020649, XM_371853, NM_031844, NM_022822, |
| GOTERM_CC_ALL | organelle envelope       | 23  | NM_004074, NM_004549, NM_178526, NM_015256, NM_001636, NM_006294, NM_001002031, NM_004255, NM_014402, NM_002635, NM_001686, NM_001863, NM_021960, NM_001865, NM_003564, NM_021074, NM_001288, NM_001001937, NM_001685, NM_031212, NM_001001977, NM_003624, NM_001002258,                                                                                                                                                                                                                                                                                                                                                                                                                                                                                                                                                                                                                                                                                                                                                                                                                                                                                                                                                                   |
| GOTERM_CC_ALL | organelle inner membrane | 18  | NM_004549, NM_004074, NM_178526, NM_001636, NM_006294, NM_001002031, NM_014402, NM_004255, NM_002635, NM_001686, NM_001863, NM_001865, NM_021074, NM_001001937, NM_001685, NM_031212, NM_001001977, NM_001002258,                                                                                                                                                                                                                                                                                                                                                                                                                                                                                                                                                                                                                                                                                                                                                                                                                                                                                                                                                                                                                          |
| GOTERM_CC_ALL | organelle lumen          | 29  | NM_005335, NM_001452, NM_003487, NM_001101, NM_001614, NM_001436, NM_005347, NM_001015052, NM_016310, NM_003113, NM_012238, NM_001033853, NM_005121, NM_002486, NM_018171, NM_005474, NM_005114, NM_001261, NM_003169, NM_016389, NM_003091, NM_001011, NM_000126, NM_015859, NM_000532, NM_005381, NM_002136, NM_022117, NM_012482, NM_001025204,                                                                                                                                                                                                                                                                                                                                                                                                                                                                                                                                                                                                                                                                                                                                                                                                                                                                                         |

|               |                                                                                           |    |                                                                                                                                                                                                                                                                                                                                                                                                                                                                                                                                                                                                      |
|---------------|-------------------------------------------------------------------------------------------|----|------------------------------------------------------------------------------------------------------------------------------------------------------------------------------------------------------------------------------------------------------------------------------------------------------------------------------------------------------------------------------------------------------------------------------------------------------------------------------------------------------------------------------------------------------------------------------------------------------|
| GOTERM_CC_ALL | organelle membrane                                                                        | 29 | NM_004549, NM_004074, NM_032452, NM_178526, NM_015256, NM_006294, NM_001002031, NM_004255, NM_005347, NM_001686, NM_001863, NM_021960, NM_001865, NM_017657, NM_001685, NM_018973, NM_018171, NM_001001977, NM_004267, NM_001636, NM_014402, NM_002635, NM_003564, NM_021074, NM_001001937, NM_003896, NM_004069, NM_031212, NM_001002258,                                                                                                                                                                                                                                                           |
| GOTERM_BP_ALL | organelle organization and biogenesis                                                     | 50 | NM_005507, NM_006082, NM_198829, NM_021109, NM_022822, NM_001175, NM_001511, NM_005487, NM_001005273, NM_032188, NM_006646, XM_293312, NM_000972, NM_007317, NM_181335, NM_002971, NM_021103, NM_005474, NM_000424, NM_002272, NM_004368, NM_014292, NM_006135, NM_003169, NM_005731, NM_152862, NM_002284, NM_001664, NM_005324, NM_001013699, NM_183049, NM_005206, NM_001436, NM_057088, NM_012238, NM_002983, NM_183040, NM_006009, NM_033396, NM_001002, NM_001037494, NM_001271, NM_005986, NM_173086, NM_002314, NM_004924, NM_138632, NM_006088, NM_003777, NM_022117, NM_020649, NM_005560, |
| GOTERM_BP_ALL | oxidative phosphorylation                                                                 | 19 | NM_007100, NM_004549, NM_004074, NM_006294, NM_006476, NM_006356, NM_001002031, NM_004255, NM_001686, NM_001863, NM_001693, NM_001865, NM_002491, NM_021074, NM_001694, NM_001001937, NM_001685, NM_001001977, NM_001002258,                                                                                                                                                                                                                                                                                                                                                                         |
| GOTERM_MF_ALL | oxidoreductase activity                                                                   | 33 | NM_016518, NM_006332, NM_004074, NM_004549, NM_001641, NM_000018, NM_001007553, NM_006294, NM_004255, NM_001863, NM_005566, NM_001865, NM_005576, NM_000636, NM_001024466, NM_002491, NM_002032, NM_000786, NM_002046, NM_198080, NM_181652, NM_005589, NM_207127, NM_153292, NM_000581, NM_201397, NM_004374, NM_003406, NM_000918, NM_014402, NM_021074, NM_002489, NM_004541, NM_144683, NM_003329,                                                                                                                                                                                               |
| GOTERM_MF_ALL | oxidoreductase activity, acting on heme group of donors                                   | 5  | NM_004074, NM_004374, NM_004255, NM_001863, NM_001865,                                                                                                                                                                                                                                                                                                                                                                                                                                                                                                                                               |
| GOTERM_MF_ALL | oxidoreductase activity, acting on heme group of donors, oxygen as acceptor               | 5  | NM_004074, NM_004374, NM_004255, NM_001863, NM_001865,                                                                                                                                                                                                                                                                                                                                                                                                                                                                                                                                               |
| GOTERM_MF_ALL | oxidoreductase activity, acting on NADH or NADPH                                          | 5  | NM_002491, NM_021074, NM_004549, NM_002489, NM_004541,                                                                                                                                                                                                                                                                                                                                                                                                                                                                                                                                               |
| GOTERM_MF_ALL | oxidoreductase activity, acting on NADH or NADPH, quinone or similar compound as acceptor | 5  | NM_002491, NM_021074, NM_004549, NM_002489, NM_004541,                                                                                                                                                                                                                                                                                                                                                                                                                                                                                                                                               |
| GOTERM_BP_ALL | oxygen and reactive oxygen species metabolism                                             | 6  | NM_000433, NM_153292, NM_000581, NM_201397, NM_001007553, NM_181652, NM_000636, NM_001024466,                                                                                                                                                                                                                                                                                                                                                                                                                                                                                                        |
| GOTERM_MF_ALL | peptide binding                                                                           | 9  | NM_002029, NM_000288, NM_020529, NM_005729, NM_021130, NM_000801, NM_001557, NM_002013, NM_002959,                                                                                                                                                                                                                                                                                                                                                                                                                                                                                                   |

|               |                       |    |                                                                                                                                                                                                                                                                                                                                                                                                                                                                                                                                                          |
|---------------|-----------------------|----|----------------------------------------------------------------------------------------------------------------------------------------------------------------------------------------------------------------------------------------------------------------------------------------------------------------------------------------------------------------------------------------------------------------------------------------------------------------------------------------------------------------------------------------------------------|
| GOTERM_CC_ALL | peroxisome            | 5  | NM_016518, NM_000288, NM_015256, NM_181652, NM_207127,                                                                                                                                                                                                                                                                                                                                                                                                                                                                                                   |
|               |                       |    | NM_003576, NM_033141, NM_032246, NM_006476, NM_173176, NM_004255, NM_001686, NM_001863, NM_032409, NM_002491, NM_002835, NM_002953, NM_001694, NM_002827, NM_006282, NM_007100, NM_002969, NM_013233, NM_001261, NM_006356, NM_144641, NM_021074, NM_006254, NM_001001937, NM_212472, NM_004549, NM_002747, NM_004074, NM_139062, NM_006294, NM_001002031, NM_014370, NM_002972, NM_003718, NM_001865, NM_001693, NM_003656, NM_001685, NM_005923, NM_001001977, NM_004877, NM_015076, NM_004333, NM_005044, NM_000211, NM_000291, NM_002314, NM_003828, |
| GOTERM_BP_ALL | phosphate metabolism  | 51 | NM_017771, NM_001002258, NM_014496,                                                                                                                                                                                                                                                                                                                                                                                                                                                                                                                      |
| GOTERM_MF_ALL | phospholipid binding  | 8  | NM_006254, NM_000700, NM_001002857, NM_013416, NM_002567, NM_017771, NM_004227, NM_007184,                                                                                                                                                                                                                                                                                                                                                                                                                                                               |
|               |                       |    | NM_003576, NM_033141, NM_032246, NM_006476, NM_173176, NM_004255, NM_001686, NM_001863, NM_032409, NM_002491, NM_002835, NM_002953, NM_001694, NM_002827, NM_006282, NM_007100, NM_002969, NM_013233, NM_001261, NM_006356, NM_144641, NM_021074, NM_006254, NM_001001937, NM_212472, NM_004549, NM_002747, NM_004074, NM_139062, NM_006294, NM_001002031, NM_014370, NM_002972, NM_003718, NM_001865, NM_001693, NM_003656, NM_001685, NM_005923, NM_001001977, NM_004877, NM_015076, NM_004333, NM_005044, NM_000211, NM_000291, NM_002314, NM_003828, |
| GOTERM_BP_ALL | phosphorus metabolism | 51 | NM_017771, NM_001002258, NM_014496,                                                                                                                                                                                                                                                                                                                                                                                                                                                                                                                      |
|               |                       |    | NM_004074, NM_002747, NM_004549, NM_003576, NM_033141, NM_139062, NM_032246, NM_006294, NM_173176, NM_006476, NM_001002031, NM_004255, NM_014370, NM_003718, NM_001686, NM_001863, NM_001693, NM_001865, NM_032409, NM_002491, NM_002953, NM_001694, NM_003656, NM_001685, NM_006282, NM_005923, NM_001001977, NM_007100, NM_002969, NM_004877, NM_013233, NM_006356, NM_001261, NM_005044, NM_004333, NM_015076, NM_000211, NM_021074, NM_002314, NM_000291, NM_006254, NM_001001937,                                                                   |
| GOTERM_BP_ALL | phosphorylation       | 46 | NM_017771, NM_001002258, NM_014496, NM_212472,                                                                                                                                                                                                                                                                                                                                                                                                                                                                                                           |



|               |                                                       |     |                                                                                                                                                                                                                                                                                                                                                                                                                                                                                                                                                                                                                                                                                                                                                                                                                                                                                                                                                                                                                                                                                                                                                                                                                                                                                                                       |
|---------------|-------------------------------------------------------|-----|-----------------------------------------------------------------------------------------------------------------------------------------------------------------------------------------------------------------------------------------------------------------------------------------------------------------------------------------------------------------------------------------------------------------------------------------------------------------------------------------------------------------------------------------------------------------------------------------------------------------------------------------------------------------------------------------------------------------------------------------------------------------------------------------------------------------------------------------------------------------------------------------------------------------------------------------------------------------------------------------------------------------------------------------------------------------------------------------------------------------------------------------------------------------------------------------------------------------------------------------------------------------------------------------------------------------------|
| GOTERM_BP_ALL | physiological process                                 | 549 | NM_000532, NM_002755, NM_178520, NM_001007555, NM_032240, NM_017420, NM_003108, NM_001005273, NM_000999, NM_152313, NM_002013, NM_003908, NM_002984, NM_207007, NM_007317, NM_005072, NM_152414, NM_002356, NM_005474, XM_372048, NM_000424, NM_002272, NM_001032, NM_013233, NM_152831, NM_152888, NM_152868, NM_138813, NM_004519, NM_006397, NM_006263, NM_019084, NM_007104, NM_013230, NM_005858, NM_004227, NM_032251, NM_012482, NM_212472, NM_017722, NM_001101, NM_001614, NM_002146, NM_018282, NM_006304, NM_001014797, NM_033223, NM_145046, NM_003245, NM_001015052, NM_018694, NM_019849, NM_000998, NM_005500, NM_003656, NM_006305, NM_183040, NM_013293, XM_293412, NM_000988, NM_020548, NM_005341, NM_018998, NM_001037663, NM_194447, NM_021029, NM_003332, NM_000994, NM_003428, NM_005986, NM_003828, NM_001085, NM_004541, NM_021130, NM_020530, NM_000996, NM_001015, NM_002691, NM_001002258, NM_018942, NM_001010850, NM_017900, NM_198829, NM_020183, NM_001024226, NM_001004, NM_001686, NM_015335, NM_015414, NM_025264, NM_205840, NM_032188, NM_006058, NM_002968, NM_003753, NM_000970, NM_001024662, NM_033267, NM_004633, NM_021103, NM_005484, NM_004366, NM_153292, NM_006135, NM_003169, NM_002635, NM_021074, NM_006497, NM_194252, NM_001664, NM_005267, NM_000532, NM_003761, |
| GOTERM_BP_ALL | positive regulation of biological process             | 34  | NM_003810, NM_003900, NM_005746, NM_017900, NM_033141, NM_032246, NM_173176, NM_015322, NM_003718, NM_005121, NM_014550, NM_001665, NM_181335, NM_006282, NM_005923, NM_001001483, NM_001114, NM_003790, NM_012235, NM_002468, NM_002029, NM_015675, NM_000985, NM_003824, NM_016479, NM_001675, NM_003169, NM_003333, NM_007355, NM_001664, NM_006088, NM_000801, NM_003168, NM_005437,                                                                                                                                                                                                                                                                                                                                                                                                                                                                                                                                                                                                                                                                                                                                                                                                                                                                                                                              |
| GOTERM_BP_ALL | positive regulation of cellular metabolism            | 10  | NM_003900, NM_001675, NM_017900, NM_005121, NM_032246, NM_003169, NM_003168, NM_005437, NM_003333, NM_012235,                                                                                                                                                                                                                                                                                                                                                                                                                                                                                                                                                                                                                                                                                                                                                                                                                                                                                                                                                                                                                                                                                                                                                                                                         |
| GOTERM_BP_ALL | positive regulation of cellular physiological process | 23  | NM_003824, NM_003900, NM_003810, NM_005746, NM_001675, NM_017900, NM_032246, NM_015322, NM_173176, NM_003169, NM_003718, NM_003333, NM_001664, NM_005121, NM_006088, NM_001665, NM_181335, NM_005437, NM_003168, NM_006282, NM_005923, NM_012235, NM_003790,                                                                                                                                                                                                                                                                                                                                                                                                                                                                                                                                                                                                                                                                                                                                                                                                                                                                                                                                                                                                                                                          |
| GOTERM_BP_ALL | positive regulation of cellular process               | 28  | NM_003810, NM_003900, NM_005746, NM_017900, NM_032246, NM_173176, NM_015322, NM_003718, NM_005121, NM_001665, NM_181335, NM_006282, NM_001001483, NM_005923, NM_003790, NM_012235, NM_002468, NM_000985, NM_003824, NM_016479, NM_001675, NM_003169, NM_003333, NM_001664, NM_006088, NM_000801, NM_003168, NM_005437,                                                                                                                                                                                                                                                                                                                                                                                                                                                                                                                                                                                                                                                                                                                                                                                                                                                                                                                                                                                                |

|               |                                                                                       |    |                                                                                                                                                                                                                                                                                                           |
|---------------|---------------------------------------------------------------------------------------|----|-----------------------------------------------------------------------------------------------------------------------------------------------------------------------------------------------------------------------------------------------------------------------------------------------------------|
| GOTERM_BP_ALL | positive regulation of enzyme activity                                                | 6  | NM_015675, NM_002029, NM_033141, NM_014550, NM_005923, NM_001114,                                                                                                                                                                                                                                         |
| GOTERM_BP_ALL | positive regulation of I-kappaB kinase/NF-kappaB cascade                              | 8  | NM_002468, NM_003824, NM_000985, NM_003810, NM_016479, NM_001664, NM_000801, NM_001001483,                                                                                                                                                                                                                |
| GOTERM_BP_ALL | positive regulation of metabolism                                                     | 11 | NM_003900, NM_001675, NM_017900, NM_005121, NM_032246, NM_003169, NM_003168, NM_005437, NM_007355, NM_003333, NM_012235,                                                                                                                                                                                  |
| GOTERM_BP_ALL | positive regulation of nucleobase, nucleoside, nucleotide and nucleic acid metabolism | 9  | NM_003900, NM_001675, NM_005121, NM_032246, NM_003169, NM_003168, NM_005437, NM_003333, NM_012235,                                                                                                                                                                                                        |
| GOTERM_BP_ALL | positive regulation of physiological process                                          | 24 | NM_003824, NM_003900, NM_003810, NM_005746, NM_001675, NM_017900, NM_032246, NM_015322, NM_173176, NM_003169, NM_003718, NM_003333, NM_007355, NM_001664, NM_005121, NM_006088, NM_001665, NM_181335, NM_005437, NM_003168, NM_006282, NM_005923, NM_012235, NM_003790,                                   |
| GOTERM_BP_ALL | positive regulation of protein kinase activity                                        | 5  | NM_015675, NM_002029, NM_033141, NM_014550, NM_005923,                                                                                                                                                                                                                                                    |
| GOTERM_BP_ALL | positive regulation of signal transduction                                            | 8  | NM_002468, NM_003824, NM_000985, NM_003810, NM_016479, NM_001664, NM_000801, NM_001001483,                                                                                                                                                                                                                |
| GOTERM_BP_ALL | positive regulation of transcription                                                  | 9  | NM_003900, NM_001675, NM_005121, NM_032246, NM_003169, NM_003168, NM_005437, NM_003333, NM_012235,                                                                                                                                                                                                        |
| GOTERM_BP_ALL | positive regulation of transcription, DNA-dependent                                   | 6  | NM_003900, NM_001675, NM_005121, NM_003169, NM_005437, NM_012235,                                                                                                                                                                                                                                         |
| GOTERM_BP_ALL | positive regulation of transferase activity                                           | 5  | NM_015675, NM_002029, NM_033141, NM_014550, NM_005923,                                                                                                                                                                                                                                                    |
| GOTERM_MF_ALL | potassium ion binding                                                                 | 9  | NM_032591, NM_000238, NM_005714, NM_001014797, NM_005072, NM_152868, NM_000702, NM_004976, NM_004519,                                                                                                                                                                                                     |
| GOTERM_BP_ALL | potassium ion transport                                                               | 12 | NM_032591, NM_000238, NM_005714, NM_015353, NM_001014797, NM_005072, NM_000352, NM_152868, NM_000702, NM_004976, NM_004519, NM_001426, NM_007100, NM_014861, NM_006476, NM_006356, NM_001002031, NM_138813, NM_001686, NM_001693, NM_001694, NM_001001937, NM_001685,                                     |
| GOTERM_MF_ALL | P-P-bond-hydrolysis-driven transporter activity                                       | 14 | NM_001001977, NM_001002258, NM_000702,                                                                                                                                                                                                                                                                    |
| GOTERM_MF_ALL | primary active transporter activity                                                   | 26 | NM_004549, NM_014861, NM_004074, NM_006476, NM_006294, NM_001002031, NM_004255, NM_001686, NM_001863, NM_001865, NM_001693, NM_002491, NM_001694, NM_001685, NM_001001977, NM_000702, NM_007100, NM_004374, NM_006356, NM_014402, NM_138813, NM_021074, NM_001001937, NM_002489, NM_004541, NM_001002258, |

|               |                                      |     |                                                                                                                                                                                                                                                                                                                                                                                                                                                                                                                                                                                                                                                                                                                                                                                                                                                                                                                                                                                                                                                                                                                                                                                                                                                                                                                                                                                        |
|---------------|--------------------------------------|-----|----------------------------------------------------------------------------------------------------------------------------------------------------------------------------------------------------------------------------------------------------------------------------------------------------------------------------------------------------------------------------------------------------------------------------------------------------------------------------------------------------------------------------------------------------------------------------------------------------------------------------------------------------------------------------------------------------------------------------------------------------------------------------------------------------------------------------------------------------------------------------------------------------------------------------------------------------------------------------------------------------------------------------------------------------------------------------------------------------------------------------------------------------------------------------------------------------------------------------------------------------------------------------------------------------------------------------------------------------------------------------------------|
| GOTERM_BP_ALL | primary metabolism                   | 357 | NM_002755, NM_005576, NM_005854, NM_001025, NM_032246, NM_001007555,<br>NM_006476, NM_017420, NM_003108, NM_000044, NM_018429, NM_001005273,<br>NM_000999, NM_194460, NM_021009, NM_032409, NM_000636, NM_001024466,<br>NM_002013, NM_001028, NM_001694, NM_016311, NM_178190, NM_003908,<br>NM_018320, NM_014780, NM_152414, NM_021167, NM_017629, NM_005474,<br>XM_372048, NM_001032, NM_002969, NM_006597, XM_371019, NM_013233,<br>NM_152831, NM_006397, NM_014884, NM_000975, NM_006254, NM_007104,<br>NM_032251, NM_015133, NM_012482, NM_212472, NM_001039465, NM_017722,<br>NM_002146, NM_002537, NM_018282, NM_001005377, NM_006304, NM_000983,<br>NM_005609, NM_145046, NM_003245, NM_001015052, NM_032836, NM_001693,<br>NM_018694, NM_002585, NM_003113, NM_000998, NM_005121, NM_005500,<br>NM_003656, NM_018973, NM_013293, NM_005923, XM_293412, NM_000988,<br>NM_005341, NM_033625, NM_001022, NM_018998, NM_005413, NM_005044,<br>NM_001037663, NM_021029, NM_000994, NM_001402, NM_003428, NM_002970,<br>NM_000843, NM_005986, NM_013234, NM_003828, NM_004593, NM_001085,<br>NM_021130, NM_006088, NM_170770, NM_000996, NM_002691, NM_001015,<br>NM_005437, NM_001002258, NM_000976, NM_018942, NM_013286, NM_017900,<br>NM_033141, NM_198829, NM_006082, NM_020183, NM_000700, NM_001004,<br>NM_207395, NM_001012321, NM_001686, NM_015335, NM_015414, NM_025264, |
| GOTERM_BP_ALL | programmed cell death                | 32  | NM_007308, NM_003810, NM_003900, NM_005507, NM_000700, NM_173176,<br>NM_015322, NM_005347, NM_021960, NM_000312, NM_201413, NM_020529,<br>NM_012238, NM_014550, NM_002598, NM_006282, NM_005923, NM_001066,<br>NM_003790, NM_015675, NM_003824, NM_004323, NM_001636, NM_003897,<br>NM_004333, NM_005745, NM_000211, NM_005345, NM_000576, NM_003295,<br>NM_006088, NM_018434,                                                                                                                                                                                                                                                                                                                                                                                                                                                                                                                                                                                                                                                                                                                                                                                                                                                                                                                                                                                                         |
| GOTERM_MF_ALL | protease inhibitor activity          | 10  | NM_003064, NM_030666, NM_201413, NM_001085, NM_000100, NM_181642,<br>NM_002567, NM_002638, NM_001002235, NM_005213,                                                                                                                                                                                                                                                                                                                                                                                                                                                                                                                                                                                                                                                                                                                                                                                                                                                                                                                                                                                                                                                                                                                                                                                                                                                                    |
| GOTERM_CC_ALL | proteasome complex (sensu Eukaryota) | 7   | NM_002810, NM_002816, NM_002799, NM_006304, NM_002800, NM_002809,<br>NM_006263,                                                                                                                                                                                                                                                                                                                                                                                                                                                                                                                                                                                                                                                                                                                                                                                                                                                                                                                                                                                                                                                                                                                                                                                                                                                                                                        |

|               |                      |     |                                                                                                                                                                                                                                                                                                                                                                                                                                                                                                                                                                                                                                                                                                                                                                                                                                                                                                                                                                                                                                                                                                                                                                                                                                                                                                |
|---------------|----------------------|-----|------------------------------------------------------------------------------------------------------------------------------------------------------------------------------------------------------------------------------------------------------------------------------------------------------------------------------------------------------------------------------------------------------------------------------------------------------------------------------------------------------------------------------------------------------------------------------------------------------------------------------------------------------------------------------------------------------------------------------------------------------------------------------------------------------------------------------------------------------------------------------------------------------------------------------------------------------------------------------------------------------------------------------------------------------------------------------------------------------------------------------------------------------------------------------------------------------------------------------------------------------------------------------------------------|
| GOTERM_MF_ALL | protein binding      | 264 | <p>NM_003307, NM_155206, NM_001023, NM_032240, NM_021100, NM_000044, NM_001005273, NM_004926, NM_194460, NM_002032, NM_020956, NM_016506, NM_018320, NM_002984, NM_207007, NM_014780, NM_002872, NM_002356, NM_005474, NM_000424, NM_002272, NM_020860, NM_002969, NM_006597, NM_013416, NM_002284, NM_001288, NM_006254, NM_182706, NM_005858, NM_032251, NM_015133, NM_002964, NM_212472, NM_003290, NM_001101, NM_001614, NM_001005377, NM_006304, NM_001014797, NM_145046, NM_032836, NM_017657, NM_057091, NM_000200, NM_002585, NM_003113, NM_005121, NM_005500, NM_003656, NM_006305, NM_183040, NM_018973, NM_005923, NM_003790, NM_020548, NM_005341, NM_001037663, NM_001402, NM_001085, NM_021130, NM_020530, NM_002652, NM_006088, NM_052978, NM_170770, NM_005437, NM_001015, NM_002691, NM_001002258, NM_005480, NM_001010850, NM_017900, NM_021109, NM_033141, NM_198829, NM_001024226, NM_000700, NM_001686, NM_205840, NM_000628, NM_003247, NM_006646, NM_006058, NM_003025, NM_000970, NM_001024662, NM_001017998, NM_000146, NM_004633, NM_021103, NM_002816, NM_004368, NM_002298, NM_153292, NM_184041, NM_012478, NM_014615, NM_006135, NM_003169, NM_001795, NM_004976, NM_001357, NM_006497, NM_004389, NM_001664, NM_001011, NM_001002235, NM_012334, NM_000986,</p> |
| GOTERM_BP_ALL | protein biosynthesis | 100 | <p>XM_371853, NM_001023, XM_927103, NM_000999, NM_001404, NM_001028, NM_001025071, NM_005617, NM_003908, NM_000972, NM_170738, NM_017629, NM_025150, NM_001006, XM_372048, NM_000985, NM_001032, NM_001026, NM_001997, XM_371019, NM_000978, NM_000975, NM_000989, NM_007104, NM_000981, NM_001012, NM_002954, NM_002948, NM_000983, NM_000998, NM_138706, NM_000969, XM_015717, NM_014445, NM_018973, XM_293412, NM_000988, NM_001002, NM_033625, NM_000971, NM_001022, NM_000984, NM_001017, NM_002952, NM_001037663, NM_021029, NM_000994, XM_370611, NM_001009, NM_001402, NM_013234, NM_001005, NM_003896, NM_000996, NM_001015, NM_001025, NM_000976, NM_001014, NM_001000, NM_001004, NM_001012321, NM_001007, NM_024996, NM_015414, NM_006058, NM_002568, NM_003753, NM_000970, NM_001024662, NM_001033853, XM_371023, NM_000973, NM_014180, XM_208185, NM_033251, NM_022551, NM_003333, NM_016219, NM_001011, NM_001031, NM_001001, XM_496442, NM_000986, NM_000980, NM_000992, NM_000661, XM_495839, NM_005801, NM_001035267, NM_001024, XM_058967, NM_152269, NM_001030009, NM_000968, NM_012235, NM_012423, NM_003973, NM_000990, NM_001020, NM_006013, NM_030919, NM_001967,</p>                                                                                                  |

|               |                                 |     |                                                                                                                                                                                                                                                                                                                                                                                                                                                                                                                                                                                                                                                                                                                                                                                                                                                                                                                                                                                                                                                                                                                                                                                                                                                                                                                    |
|---------------|---------------------------------|-----|--------------------------------------------------------------------------------------------------------------------------------------------------------------------------------------------------------------------------------------------------------------------------------------------------------------------------------------------------------------------------------------------------------------------------------------------------------------------------------------------------------------------------------------------------------------------------------------------------------------------------------------------------------------------------------------------------------------------------------------------------------------------------------------------------------------------------------------------------------------------------------------------------------------------------------------------------------------------------------------------------------------------------------------------------------------------------------------------------------------------------------------------------------------------------------------------------------------------------------------------------------------------------------------------------------------------|
|               |                                 |     | NM_032452, NM_002755, XM_371855, NM_051844, NM_014405, NM_001025, NM_032246, NM_022822, NM_006476, XM_927103, NM_005347, NM_000999, NM_001404, NM_194460, NM_001028, NM_002032, NM_001025071, NM_005617, NM_001694, NM_000972, NM_003908, NM_018320, NM_007317, NM_201998, NM_170738, NM_014548, NM_014780, NM_005474, NM_007100, NM_000985, XM_372048, NM_001006, NM_001032, NM_001026, NM_001997, XM_371019, NM_001636, NM_001261, NM_152868, NM_006833, NM_000978, NM_004519, NM_006263, NM_000975, NM_005516, NM_000989, NM_001001937, NM_021019, NM_079423, NM_007104, NM_002136, NM_000981, NM_001013699, NM_005721, NM_012482, NM_001012, NM_002954, NM_212472, NM_005335, NM_001452, NM_005720, NM_001101, NM_001614, NM_002948, NM_006304, NM_005968, NM_001002031, NM_001014797, NM_000983, NM_002809, NM_017657, NM_001693, NM_000998, NM_005121, NM_000969, XM_015717, NM_001685, NM_018973, NM_014445, NM_006009, XM_293412, NM_000988, NM_033546, NM_001002, NM_000971, NM_033625, NM_004475, NM_005789, NM_001022, NM_012158, NM_000984, NM_001017, NM_023035, NM_003347, NM_001037663, NM_002952, NM_001037494, NM_021029, NM_001009, XM_370611, NM_000994, NM_016389, NM_001005, NM_006088, NM_170770, NM_000996, NM_001015, NM_003777, NM_031266, NM_001025, NM_001002258, NM_000976, NM_001014, |
| GOTERM_CC_ALL | protein complex                 | 192 |                                                                                                                                                                                                                                                                                                                                                                                                                                                                                                                                                                                                                                                                                                                                                                                                                                                                                                                                                                                                                                                                                                                                                                                                                                                                                                                    |
| GOTERM_BP_ALL | protein complex assembly        | 15  | NM_032452, NM_001039465, NM_173176, NM_004781, NM_006135, NM_003245, NM_006646, NM_152879, XM_293312, NM_014550, NM_201998, NM_003761, NM_022117, NM_005324, NM_001013699,                                                                                                                                                                                                                                                                                                                                                                                                                                                                                                                                                                                                                                                                                                                                                                                                                                                                                                                                                                                                                                                                                                                                         |
| GOTERM_MF_ALL | protein dimerization activity   | 13  | NM_000424, NM_002272, NM_001675, NM_002229, NM_033141, NM_004729, NM_000044, NM_000521, NM_021960, NM_005252, NM_032591, NM_005500, NM_005194, NM_006282,                                                                                                                                                                                                                                                                                                                                                                                                                                                                                                                                                                                                                                                                                                                                                                                                                                                                                                                                                                                                                                                                                                                                                          |
| GOTERM_MF_ALL | protein domain specific binding | 5   | NM_003900, NM_002835, NM_003406, NM_005206, NM_007355,                                                                                                                                                                                                                                                                                                                                                                                                                                                                                                                                                                                                                                                                                                                                                                                                                                                                                                                                                                                                                                                                                                                                                                                                                                                             |
| GOTERM_MF_ALL | protein kinase binding          | 9   | NM_003824, NM_003900, NM_006457, NM_005858, NM_006098, NM_032836, NM_015133, NM_000211, NM_005456,                                                                                                                                                                                                                                                                                                                                                                                                                                                                                                                                                                                                                                                                                                                                                                                                                                                                                                                                                                                                                                                                                                                                                                                                                 |
| GOTERM_BP_ALL | protein kinase cascade          | 21  | NM_002468, NM_003824, NM_003900, NM_003810, NM_002029, NM_015675, NM_000985, NM_016479, NM_033141, NM_212492, NM_032246, NM_032409, NM_001664, NM_020529, NM_014550, NM_000801, NM_006282, NM_005923, NM_001001483, NM_015133, NM_005456,                                                                                                                                                                                                                                                                                                                                                                                                                                                                                                                                                                                                                                                                                                                                                                                                                                                                                                                                                                                                                                                                          |
| GOTERM_MF_ALL | protein kinase CK2 activity     | 13  | NM_002747, NM_003576, NM_002969, NM_013233, NM_001261, NM_014370, NM_005044, NM_032409, NM_002314, NM_002953, NM_006282, NM_014496, NM_212472,                                                                                                                                                                                                                                                                                                                                                                                                                                                                                                                                                                                                                                                                                                                                                                                                                                                                                                                                                                                                                                                                                                                                                                     |

|               |                                          |     |                                                                                                                                                                                                                                                                                                                                                                                                                                                                                                                                                                                                                                                                                                                                                                                                                                                                                                                                                                                                                                                                                                                                                                                                                                    |
|---------------|------------------------------------------|-----|------------------------------------------------------------------------------------------------------------------------------------------------------------------------------------------------------------------------------------------------------------------------------------------------------------------------------------------------------------------------------------------------------------------------------------------------------------------------------------------------------------------------------------------------------------------------------------------------------------------------------------------------------------------------------------------------------------------------------------------------------------------------------------------------------------------------------------------------------------------------------------------------------------------------------------------------------------------------------------------------------------------------------------------------------------------------------------------------------------------------------------------------------------------------------------------------------------------------------------|
| GOTERM_BP_ALL | protein localization                     | 29  | NM_003900, NM_032452, NM_005932, NM_001024226, NM_014453, NM_007285, NM_022080, NM_017657, NM_001662, NM_020529, NM_001031677, NM_001017998, NM_176812, NM_007347, NM_003569, NM_005745, NM_000978, NM_002959, NM_016226, NM_000288, NM_001664, NM_001494, NM_004069, NM_031431, NM_021168, NM_003624, NM_183235, NM_019059, NM_006822, NM_002755, NM_005576, NM_001023, NM_032240, NM_000955, NM_194400,                                                                                                                                                                                                                                                                                                                                                                                                                                                                                                                                                                                                                                                                                                                                                                                                                          |
| GOTERM_BP_ALL | protein metabolism                       | 203 | NM_032409, NM_002013, NM_021009, NM_001028, NM_003908, NM_018320, NM_014780, NM_017629, XM_372048, NM_001032, NM_002969, NM_006597, XM_371019, NM_013233, NM_152831, NM_000975, NM_006254, NM_007104, NM_015133, NM_212472, NM_001039465, NM_001005377, NM_006304, NM_000983, NM_145046, NM_003245, NM_000998, NM_005500, NM_003656, NM_018973, NM_005923, XM_293412, NM_000988, NM_033625, NM_001022, NM_018998, NM_001037663, NM_005044, NM_021029, NM_000994, NM_001402, NM_013234, NM_003828, NM_021130, NM_006088, NM_000996, NM_170770, NM_001015, NM_000976, NM_017900, NM_006082, NM_198829, NM_033141, NM_001004, NM_001012321, NM_015414, NM_006646, NM_006058, NM_003753, NM_000970, NM_001024662, NM_001017998, NM_014180, NM_005484, NM_002816, XM_208185, NM_033251, NM_022551, NM_014615, NM_006135, NM_194252, NM_001011, NM_001001, NM_003761, NM_005324, XM_496442, NM_000986, NM_000980, NM_014370, NM_002800, XM_495839, NM_005801, NM_001024, XM_058967, NM_000312, NM_152269, NM_012238, NM_001030009, NM_183421, NM_145897, NM_012235, NM_012423, NM_003973, NM_004333, NM_001020, NM_002314, NM_138632, NM_006357, NM_017771, NM_030919, NM_014496, XM_371853, NM_032452, NM_173176, XM_927103, NM_001404, |
| GOTERM_BP_ALL | protein polymerization                   | 6   | NM_006646, NM_006082, NM_198829, NM_006088, NM_006009, NM_005731, NM_152862,                                                                                                                                                                                                                                                                                                                                                                                                                                                                                                                                                                                                                                                                                                                                                                                                                                                                                                                                                                                                                                                                                                                                                       |
| GOTERM_MF_ALL | protein serine/threonine kinase activity | 22  | NM_002747, NM_003576, NM_002969, NM_033141, NM_139062, NM_032246, NM_013233, NM_001261, NM_005044, NM_004333, NM_015076, NM_014370, NM_003718, NM_032409, NM_002953, NM_002314, NM_006254, NM_003656, NM_006282, NM_005923, NM_014496, NM_212472,                                                                                                                                                                                                                                                                                                                                                                                                                                                                                                                                                                                                                                                                                                                                                                                                                                                                                                                                                                                  |
| GOTERM_BP_ALL | protein transport                        | 28  | NM_032452, NM_005932, NM_001024226, NM_014453, NM_007285, NM_022080, NM_017657, NM_001662, NM_020529, NM_001031677, NM_001017998, NM_176812, NM_007347, NM_003569, NM_005745, NM_000978, NM_002959, NM_016226, NM_001664, NM_000288, NM_001494, NM_004069, NM_031431, NM_021168, NM_003624, NM_183235, NM_019059, NM_006822,                                                                                                                                                                                                                                                                                                                                                                                                                                                                                                                                                                                                                                                                                                                                                                                                                                                                                                       |

|               |                                                                |    |                                                                                                                                                                                                                                                                                                                                                                                                                                                                                                                                                                                                                                                                                                                                                                                                                                                                                                                                                                 |
|---------------|----------------------------------------------------------------|----|-----------------------------------------------------------------------------------------------------------------------------------------------------------------------------------------------------------------------------------------------------------------------------------------------------------------------------------------------------------------------------------------------------------------------------------------------------------------------------------------------------------------------------------------------------------------------------------------------------------------------------------------------------------------------------------------------------------------------------------------------------------------------------------------------------------------------------------------------------------------------------------------------------------------------------------------------------------------|
| GOTERM_BP_ALL | proton transport                                               | 13 | NM_007100, NM_014861, NM_006476, NM_006356, NM_001002031, NM_001686, NM_001693, NM_001694, NM_001001937, NM_001685, NM_001001977, NM_001002258, NM_000702,                                                                                                                                                                                                                                                                                                                                                                                                                                                                                                                                                                                                                                                                                                                                                                                                      |
| GOTERM_CC_ALL | proton-transporting ATP synthase complex                       | 9  | NM_007100, NM_001001937, NM_006476, NM_001002031, NM_006356, NM_001685, NM_001001977, NM_001686, NM_001002258,                                                                                                                                                                                                                                                                                                                                                                                                                                                                                                                                                                                                                                                                                                                                                                                                                                                  |
| GOTERM_CC_ALL | proton-transporting ATP synthase complex (sensu Eukaryota)     | 5  | NM_001001937, NM_001002031, NM_001001977, NM_001686, NM_001002258,                                                                                                                                                                                                                                                                                                                                                                                                                                                                                                                                                                                                                                                                                                                                                                                                                                                                                              |
| GOTERM_CC_ALL | proton-transporting ATP synthase complex, coupling factor F(o) | 6  | NM_007100, NM_006476, NM_001002031, NM_006356, NM_001685, NM_001002258,                                                                                                                                                                                                                                                                                                                                                                                                                                                                                                                                                                                                                                                                                                                                                                                                                                                                                         |
| GOTERM_CC_ALL | proton-transporting two-sector ATPase complex                  | 11 | NM_007100, NM_001694, NM_001001937, NM_006476, NM_001002031, NM_006356, NM_001685, NM_001001977, NM_001686, NM_001002258, NM_001693,                                                                                                                                                                                                                                                                                                                                                                                                                                                                                                                                                                                                                                                                                                                                                                                                                            |
| GOTERM_BP_ALL | purine nucleoside triphosphate biosynthesis                    | 13 | NM_007100, NM_006476, NM_006356, NM_001002031, NM_001686, NM_001693, NM_001694, NM_001001937, NM_002512, NM_001685, NM_003987, NM_001001977, NM_001002258,                                                                                                                                                                                                                                                                                                                                                                                                                                                                                                                                                                                                                                                                                                                                                                                                      |
| GOTERM_BP_ALL | purine nucleoside triphosphate metabolism                      | 13 | NM_007100, NM_006476, NM_006356, NM_001002031, NM_001686, NM_001693, NM_001694, NM_001001937, NM_002512, NM_001685, NM_003987, NM_001001977, NM_001002258,                                                                                                                                                                                                                                                                                                                                                                                                                                                                                                                                                                                                                                                                                                                                                                                                      |
| GOTERM_MF_ALL | purine nucleotide binding                                      | 82 | NM_031844, NM_003576, NM_021205, NM_033141, NM_198829, NM_006082, NM_001024226, NM_173176, NM_005347, NM_001686, NM_001005273, NM_024996, NM_032409, NM_002953, NM_001031677, NM_006270, NM_002567, NM_001017998, NM_001665, NM_007317, NM_006282, NM_003987, NM_002872, NM_025150, NM_201533, NM_012393, NM_002969, NM_006597, NM_153292, NM_013233, NM_001261, NM_138813, NM_001357, NM_001664, NM_006254, NM_001001937, NM_002524, NM_001068, NM_012334, NM_021168, NM_005721, NM_212472, NM_002747, NM_014861, NM_139062, NM_148977, NM_001101, NM_001614, NM_007285, NM_024045, NM_014370, NM_003718, NM_003245, NM_001693, NM_001662, NM_020812, NM_003656, NM_002512, NM_005923, NM_006009, NM_000702, NM_004566, NM_175571, NM_000352, NM_005044, NM_004333, NM_015076, NM_001271, NM_001402, NM_007355, NM_002314, NM_000291, NM_005345, NM_021033, NM_138769, NM_006088, NM_017771, NM_003777, NM_030919, NM_001967, NM_183235, NM_014496, NM_006822, |
| GOTERM_BP_ALL | purine nucleotide biosynthesis                                 | 14 | NM_007100, NM_006476, NM_006356, NM_001002031, NM_001686, NM_001693, NM_001694, NM_001001937, NM_002512, NM_001685, NM_001001977, NM_003987, NM_001002258, NM_012393,                                                                                                                                                                                                                                                                                                                                                                                                                                                                                                                                                                                                                                                                                                                                                                                           |
| GOTERM_BP_ALL | purine nucleotide metabolism                                   | 14 | NM_007100, NM_006476, NM_006356, NM_001002031, NM_001686, NM_001693, NM_001694, NM_001001937, NM_002512, NM_001685, NM_001001977, NM_003987, NM_001002258, NM_012393,                                                                                                                                                                                                                                                                                                                                                                                                                                                                                                                                                                                                                                                                                                                                                                                           |

|               |                                                 |    |                                                                                                                                                                                                                                                                                                                                                                                                                                                                   |
|---------------|-------------------------------------------------|----|-------------------------------------------------------------------------------------------------------------------------------------------------------------------------------------------------------------------------------------------------------------------------------------------------------------------------------------------------------------------------------------------------------------------------------------------------------------------|
| GOTERM_BP_ALL | purine ribonucleoside triphosphate biosynthesis | 13 | NM_007100, NM_006476, NM_006356, NM_001002031, NM_001686, NM_001693, NM_001694, NM_001001937, NM_002512, NM_001685, NM_003987, NM_001001977, NM_001002258,                                                                                                                                                                                                                                                                                                        |
| GOTERM_BP_ALL | purine ribonucleoside triphosphate metabolism   | 13 | NM_007100, NM_006476, NM_006356, NM_001002031, NM_001686, NM_001693, NM_001694, NM_001001937, NM_002512, NM_001685, NM_003987, NM_001001977, NM_001002258,                                                                                                                                                                                                                                                                                                        |
| GOTERM_BP_ALL | purine ribonucleotide biosynthesis              | 14 | NM_007100, NM_006476, NM_006356, NM_001002031, NM_001686, NM_001693, NM_001694, NM_001001937, NM_002512, NM_001685, NM_001001977, NM_003987, NM_001002258, NM_012393,                                                                                                                                                                                                                                                                                             |
| GOTERM_BP_ALL | purine ribonucleotide metabolism                | 14 | NM_007100, NM_006476, NM_006356, NM_001002031, NM_001686, NM_001693, NM_001694, NM_001001937, NM_002512, NM_001685, NM_001001977, NM_003987, NM_001002258, NM_012393,                                                                                                                                                                                                                                                                                             |
| GOTERM_MF_ALL | pyrophosphatase activity                        | 39 | NM_014861, NM_006082, NM_198829, NM_001024226, NM_006476, NM_024045, NM_001002031, NM_001686, NM_001005273, NM_003245, NM_001693, NM_001662, NM_001694, NM_006270, NM_001017998, NM_001665, NM_001685, NM_006009, NM_001001977, NM_002872, NM_000702, NM_007100, NM_006597, NM_199040, NM_006356, NM_000352, NM_138813, NM_001271, NM_001402, NM_001357, NM_001664, NM_001001937, NM_002524, NM_021033, NM_006088, NM_003777, NM_001002258, NM_001967, NM_183235, |
| GOTERM_MF_ALL | receptor binding                                | 34 | NM_003810, NM_005746, NM_001010850, NM_000700, NM_015322, NM_007285, NM_001511, NM_004926, NM_032836, NM_057091, NM_002983, NM_005121, NM_001405, NM_002984, NM_207007, NM_006098, NM_002162, NM_006312, NM_173842, NM_002468, NM_003824, NM_020548, NM_004877, NM_001005611, NM_004114, NM_005745, NM_002341, NM_000576, NM_020530, NM_003378, NM_006088, NM_005437, NM_000584, NM_005560, NM_002964,                                                            |
| GOTERM_BP_ALL | regulation of apoptosis                         | 19 | NM_007308, NM_003810, NM_003824, NM_005507, NM_004323, NM_000700, NM_003897, NM_015322, NM_004333, NM_005347, NM_021960, NM_000312, NM_005345, NM_014550, NM_003295, NM_006088, NM_006282, NM_005923, NM_003790,                                                                                                                                                                                                                                                  |



|               |                                  |     |                                                                                                                                                                                                                                                                                                                                                                                                                                                                                                                                                                                                                                                                                                                                                                                                                                                                                                                                                                                                                                                                                                                                                                                                                                                                                                                    |
|---------------|----------------------------------|-----|--------------------------------------------------------------------------------------------------------------------------------------------------------------------------------------------------------------------------------------------------------------------------------------------------------------------------------------------------------------------------------------------------------------------------------------------------------------------------------------------------------------------------------------------------------------------------------------------------------------------------------------------------------------------------------------------------------------------------------------------------------------------------------------------------------------------------------------------------------------------------------------------------------------------------------------------------------------------------------------------------------------------------------------------------------------------------------------------------------------------------------------------------------------------------------------------------------------------------------------------------------------------------------------------------------------------|
|               |                                  |     | NM_005567, NM_005554, NM_001007555, NM_032246, NM_004555, NM_015522, NM_173176, NM_017420, NM_003108, NM_000044, NM_001511, NM_005347, NM_005487, NM_018429, NM_001005273, NM_000636, NM_001024466, NM_002032, NM_153649, NM_016311, NM_178190, NM_001623, NM_004847, NM_201998, NM_181335, NM_005072, NM_014780, NM_003927, NM_002971, NM_152414, NM_021167, NM_003987, NM_005474, NM_000985, NM_000424, NM_002272, NM_002029, NM_004323, NM_002969, NM_015714, NM_014517, NM_199040, NM_001261, NM_006635, NM_003295, NM_019084, NM_032251, NM_015133, NM_012482, NM_212472, NM_007308, NM_001037637, NM_005335, NM_001452, NM_002146, NM_018282, NM_001005377, NM_014781, NM_032836, NM_021960, NM_002585, NM_003113, NM_020529, NM_005121, NM_002823, NM_005923, NM_001001483, NM_033546, NM_001114, NM_003790, NM_005341, NM_014213, NM_006930, NM_005413, NM_001402, NM_003428, NM_007355, NM_000843, NM_005986, NM_001085, NM_020244, NM_000576, NM_021130, NM_020530, NM_006088, NM_000801, NM_005437, NM_022117, NM_005456, NM_018942, NM_003810, NM_005746, NM_013286, NM_017900, NM_033141, NM_212492, NM_002432, NM_198829, NM_020183, NM_000700, NM_001175, NM_207395, NM_001012321, NM_025264, NM_015335, NM_205840, NM_032188, NM_002568, NM_002968, NM_006058, NM_000970, NM_001024662, NM_003753, |
| GOTERM_BP_ALL | regulation of biological process | 182 | NM_002568, NM_003753, NM_001012321, NM_001967, NM_001402, NM_005801, NM_007355, NM_012235,                                                                                                                                                                                                                                                                                                                                                                                                                                                                                                                                                                                                                                                                                                                                                                                                                                                                                                                                                                                                                                                                                                                                                                                                                         |
| GOTERM_BP_ALL | regulation of biosynthesis       | 8   | NM_003641, NM_017900, NM_002969, NM_006930, NM_015714, NM_012090, NM_014781, NM_005938, NM_001261, NM_003718, NM_019001, NM_006497, NM_001623, NM_004847, NM_000576, NM_002524, NM_001800, NM_019084, NM_001665, NM_002512, NM_002823, NM_005072, NM_000584, NM_022117, NM_005474,                                                                                                                                                                                                                                                                                                                                                                                                                                                                                                                                                                                                                                                                                                                                                                                                                                                                                                                                                                                                                                 |
| GOTERM_BP_ALL | regulation of cell cycle         | 24  | NM_000424, NM_002272, NM_003641, NM_005746, NM_173176, NM_005620, NM_005938, NM_001511, NM_003718, NM_205840, NM_002032, NM_001623, NM_004847, NM_153232, NM_000576, NM_001800, NM_020530, NM_001665, NM_002512, NM_000584, NM_006763,                                                                                                                                                                                                                                                                                                                                                                                                                                                                                                                                                                                                                                                                                                                                                                                                                                                                                                                                                                                                                                                                             |
| GOTERM_BP_ALL | regulation of cell proliferation | 19  |                                                                                                                                                                                                                                                                                                                                                                                                                                                                                                                                                                                                                                                                                                                                                                                                                                                                                                                                                                                                                                                                                                                                                                                                                                                                                                                    |

|               |                                              |     |                                                                                                                                                                                                                                                                                                                                                                                                                                                                                                                                                                                                                                                                                                                                                                                                                                                                                                                                                                                                                                                                                                                                                                                                                                                                                                                           |
|---------------|----------------------------------------------|-----|---------------------------------------------------------------------------------------------------------------------------------------------------------------------------------------------------------------------------------------------------------------------------------------------------------------------------------------------------------------------------------------------------------------------------------------------------------------------------------------------------------------------------------------------------------------------------------------------------------------------------------------------------------------------------------------------------------------------------------------------------------------------------------------------------------------------------------------------------------------------------------------------------------------------------------------------------------------------------------------------------------------------------------------------------------------------------------------------------------------------------------------------------------------------------------------------------------------------------------------------------------------------------------------------------------------------------|
| GOTERM_BP_ALL | regulation of cellular physiological process | 153 | <p>NM_005307, NM_005054, NM_001007555, NM_032240, NM_004555, NM_015522, NM_173176, NM_017420, NM_003108, NM_000044, NM_001511, NM_005347, NM_005487, NM_018429, NM_001005273, NM_000636, NM_001024466, NM_002032, NM_016311, NM_178190, NM_001623, NM_004847, NM_201998, NM_181335, NM_005072, NM_003927, NM_002971, NM_152414, NM_021167, NM_003987, NM_005474, NM_000424, NM_002272, NM_004323, NM_002969, NM_015714, NM_014517, NM_199040, NM_001261, NM_006635, NM_003295, NM_019084, NM_032251, NM_012482, NM_212472, NM_007308, NM_001037637, NM_005335, NM_001452, NM_002146, NM_018282, NM_014781, NM_032836, NM_021960, NM_002585, NM_003113, NM_020529, NM_005121, NM_002823, NM_005923, NM_003790, NM_005341, NM_014213, NM_006930, NM_005413, NM_001402, NM_003428, NM_000843, NM_005986, NM_020244, NM_000576, NM_020530, NM_006088, NM_005437, NM_022117, NM_018942, NM_003810, NM_005746, NM_013286, NM_017900, NM_002432, NM_198829, NM_020183, NM_000700, NM_207395, NM_001012321, NM_015335, NM_205840, NM_032188, NM_002568, NM_002968, NM_003753, NM_000970, NM_001024662, NM_014550, NM_015906, NM_001665, NM_001964, NM_006282, NM_033267, NM_024016, NM_001005611, NM_003897, NM_014292, NM_006135, NM_003169, NM_003453, NM_003333, NM_005731, NM_152862, NM_003260, NM_006497, NM_001664,</p>    |
| GOTERM_BP_ALL | regulation of cellular process               | 163 | <p>NM_005307, NM_005054, NM_001007555, NM_032240, NM_004555, NM_015522, NM_173176, NM_017420, NM_003108, NM_000044, NM_001511, NM_005347, NM_005487, NM_018429, NM_001005273, NM_000636, NM_001024466, NM_002032, NM_016311, NM_178190, NM_001623, NM_004847, NM_201998, NM_181335, NM_005072, NM_014780, NM_003927, NM_002971, NM_152414, NM_021167, NM_003987, NM_005474, NM_000985, NM_000424, NM_002272, NM_004323, NM_002969, NM_015714, NM_014517, NM_199040, NM_001261, NM_006635, NM_003295, NM_019084, NM_032251, NM_015133, NM_012482, NM_212472, NM_007308, NM_001037637, NM_005335, NM_001452, NM_002146, NM_018282, NM_014781, NM_032836, NM_021960, NM_002585, NM_003113, NM_020529, NM_005121, NM_002823, NM_005923, NM_001001483, NM_003790, NM_005341, NM_014213, NM_006930, NM_005413, NM_001402, NM_003428, NM_000843, NM_005986, NM_020244, NM_000576, NM_020530, NM_006088, NM_000801, NM_005437, NM_022117, NM_005456, NM_018942, NM_003810, NM_005746, NM_013286, NM_017900, NM_002432, NM_198829, NM_020183, NM_000700, NM_001175, NM_207395, NM_001012321, NM_015335, NM_205840, NM_032188, NM_002568, NM_002968, NM_003753, NM_000970, NM_001024662, NM_014550, NM_015906, NM_001665, NM_001964, NM_006282, NM_033267, NM_024016, NM_002468, NM_001005611, NM_003897, NM_014292, NM_003169,</p> |

|               |                                                 |     |                                                                                                                                                                                                                                                                                                                                                                                                                                                                                                                                                                                                                                                                                                                                                                                                                                                                                                                                                                                                                                                                                                                                                                                                                                                                                                                                                                                                                                                                                                                          |
|---------------|-------------------------------------------------|-----|--------------------------------------------------------------------------------------------------------------------------------------------------------------------------------------------------------------------------------------------------------------------------------------------------------------------------------------------------------------------------------------------------------------------------------------------------------------------------------------------------------------------------------------------------------------------------------------------------------------------------------------------------------------------------------------------------------------------------------------------------------------------------------------------------------------------------------------------------------------------------------------------------------------------------------------------------------------------------------------------------------------------------------------------------------------------------------------------------------------------------------------------------------------------------------------------------------------------------------------------------------------------------------------------------------------------------------------------------------------------------------------------------------------------------------------------------------------------------------------------------------------------------|
| GOTERM_BP_ALL | regulation of enzyme activity                   | 13  | NM_006076, NM_002029, NM_015675, NM_212492, NM_033141, NM_032246, NM_005347, NM_014550, NM_001800, NM_001494, NM_005923, NM_022117, NM_001114,                                                                                                                                                                                                                                                                                                                                                                                                                                                                                                                                                                                                                                                                                                                                                                                                                                                                                                                                                                                                                                                                                                                                                                                                                                                                                                                                                                           |
| GOTERM_BP_ALL | regulation of I-kappaB kinase/NF-kappaB cascade | 9   | NM_002468, NM_003824, NM_003900, NM_000985, NM_003810, NM_016479, NM_001664, NM_000801, NM_001001483,                                                                                                                                                                                                                                                                                                                                                                                                                                                                                                                                                                                                                                                                                                                                                                                                                                                                                                                                                                                                                                                                                                                                                                                                                                                                                                                                                                                                                    |
| GOTERM_BP_ALL | regulation of kinase activity                   | 9   | NM_015675, NM_002029, NM_033141, NM_212492, NM_014550, NM_032246, NM_001800, NM_005923, NM_022117,                                                                                                                                                                                                                                                                                                                                                                                                                                                                                                                                                                                                                                                                                                                                                                                                                                                                                                                                                                                                                                                                                                                                                                                                                                                                                                                                                                                                                       |
| GOTERM_BP_ALL | regulation of physiological process             | 160 | NM_005507, NM_005054, NM_001007555, NM_032246, NM_004559, NM_015522, NM_173176, NM_017420, NM_003108, NM_000044, NM_001511, NM_005347, NM_005487, NM_018429, NM_001005273, NM_000636, NM_001024466, NM_002032, NM_153649, NM_016311, NM_178190, NM_001623, NM_004847, NM_201998, NM_181335, NM_005072, NM_003927, NM_002971, NM_152414, NM_021167, NM_003987, NM_005474, NM_000424, NM_002272, NM_004323, NM_002969, NM_015714, NM_014517, NM_199040, NM_001261, NM_006635, NM_003295, NM_019084, NM_032251, NM_012482, NM_212472, NM_007308, NM_001037637, NM_005335, NM_001452, NM_002146, NM_018282, NM_001005377, NM_014781, NM_032836, NM_021960, NM_002585, NM_003113, NM_020529, NM_005121, NM_002823, NM_005923, NM_033546, NM_003790, NM_005341, NM_014213, NM_006930, NM_005413, NM_001402, NM_003428, NM_007355, NM_000843, NM_005986, NM_001085, NM_020244, NM_000576, NM_020530, NM_006088, NM_005437, NM_022117, NM_018942, NM_003810, NM_005746, NM_013286, NM_017900, NM_002432, NM_198829, NM_020183, NM_000700, NM_207395, NM_001012321, NM_015335, NM_205840, NM_032188, NM_002568, NM_002968, NM_003753, NM_000970, NM_001024662, NM_014550, NM_015906, NM_001665, NM_001964, NM_006282, NM_033267, NM_024016, NM_001005611, NM_003897, NM_014292, NM_003169, NM_006135, NM_003453, NM_007308, NM_003810, NM_003824, NM_005507, NM_004323, NM_000700, NM_003897, NM_015322, NM_004333, NM_005347, NM_021960, NM_000312, NM_005345, NM_014550, NM_003295, NM_006088, NM_006282, NM_005923, NM_003790, |
| GOTERM_BP_ALL | regulation of programmed cell death             | 19  | NM_003641, NM_017900, NM_002969, NM_006930, NM_015714, NM_012090, NM_014781, NM_005938, NM_001261, NM_003718, NM_019001, NM_006497, NM_001623, NM_004847, NM_000576, NM_002524, NM_001800, NM_019084, NM_001665, NM_002512, NM_002823, NM_005072, NM_000584, NM_022117, NM_005474,                                                                                                                                                                                                                                                                                                                                                                                                                                                                                                                                                                                                                                                                                                                                                                                                                                                                                                                                                                                                                                                                                                                                                                                                                                       |
| GOTERM_BP_ALL | regulation of progression through cell cycle    | 24  | NM_002568, NM_003753, NM_001012321, NM_001967, NM_001402, NM_005801, NM_012235,                                                                                                                                                                                                                                                                                                                                                                                                                                                                                                                                                                                                                                                                                                                                                                                                                                                                                                                                                                                                                                                                                                                                                                                                                                                                                                                                                                                                                                          |
| GOTERM_BP_ALL | regulation of protein biosynthesis              | 7   | NM_015675, NM_002029, NM_033141, NM_212492, NM_014550, NM_032246, NM_001800, NM_005923, NM_022117,                                                                                                                                                                                                                                                                                                                                                                                                                                                                                                                                                                                                                                                                                                                                                                                                                                                                                                                                                                                                                                                                                                                                                                                                                                                                                                                                                                                                                       |
| GOTERM_BP_ALL | regulation of protein kinase activity           | 9   |                                                                                                                                                                                                                                                                                                                                                                                                                                                                                                                                                                                                                                                                                                                                                                                                                                                                                                                                                                                                                                                                                                                                                                                                                                                                                                                                                                                                                                                                                                                          |

|               |                                                             |    |                                                                                                                                                                                                                                                                                                                                                                                                                                                                                                                                                                                                                                                                                                                                                        |
|---------------|-------------------------------------------------------------|----|--------------------------------------------------------------------------------------------------------------------------------------------------------------------------------------------------------------------------------------------------------------------------------------------------------------------------------------------------------------------------------------------------------------------------------------------------------------------------------------------------------------------------------------------------------------------------------------------------------------------------------------------------------------------------------------------------------------------------------------------------------|
| GOTERM_BP_ALL | regulation of protein metabolism                            | 13 | NM_017900, NM_001005377, NM_006135, NM_001012321, NM_005801, NM_000211, NM_001402, NM_005731, NM_152862, NM_002568, NM_003753, NM_138632, NM_001967, NM_012235,                                                                                                                                                                                                                                                                                                                                                                                                                                                                                                                                                                                        |
| GOTERM_BP_ALL | regulation of signal transduction                           | 15 | NM_002468, NM_003810, NM_000985, NM_003900, NM_003824, NM_016479, NM_198829, NM_001664, NM_153232, NM_000801, NM_001001483, NM_002923, NM_022117, NM_015133, NM_005456,                                                                                                                                                                                                                                                                                                                                                                                                                                                                                                                                                                                |
| GOTERM_BP_ALL | regulation of transcription from RNA polymerase II promoter | 16 | NM_003900, NM_002229, NM_001675, NM_020183, NM_005206, NM_014517, NM_003169, NM_001271, NM_001005273, NM_021005, NM_005252, NM_000636, NM_001024466, NM_002585, NM_005121, NM_012482, NM_212472,                                                                                                                                                                                                                                                                                                                                                                                                                                                                                                                                                       |
| GOTERM_BP_ALL | regulation of transferase activity                          | 9  | NM_015675, NM_002029, NM_033141, NM_212492, NM_014550, NM_032246, NM_001800, NM_005923, NM_022117,                                                                                                                                                                                                                                                                                                                                                                                                                                                                                                                                                                                                                                                     |
| GOTERM_BP_ALL | regulation of translation                                   | 6  | NM_002568, NM_003753, NM_001012321, NM_001967, NM_001402, NM_005801,                                                                                                                                                                                                                                                                                                                                                                                                                                                                                                                                                                                                                                                                                   |
| GOTERM_BP_ALL | regulation of transport                                     | 5  | NM_001664, NM_020529, NM_198829, NM_199040, NM_004069,                                                                                                                                                                                                                                                                                                                                                                                                                                                                                                                                                                                                                                                                                                 |
| GOTERM_BP_ALL | response to abiotic stimulus                                | 28 | NM_001007553, NM_001005377, NM_001511, NM_016190, NM_000636, NM_001024466, NM_000200, NM_006096, NM_152879, NM_002983, NM_020956, NM_006788, NM_002984, NM_207007, NM_181652, NM_002029, NM_006597, NM_021200, NM_000581, NM_201397, NM_003169, NM_007355, NM_000211, NM_000843, NM_001280, NM_005345, NM_002524, NM_002691, NM_000160, NM_001557, NM_000584,                                                                                                                                                                                                                                                                                                                                                                                          |
| GOTERM_BP_ALL | response to biotic stimulus                                 | 62 | NM_003810, NM_006332, NM_001010850, NM_002432, NM_000700, NM_004559, NM_001175, NM_001511, NM_004048, NM_000636, NM_001024466, NM_205840, NM_000628, NM_002032, NM_006058, NM_001623, NM_004847, NM_002984, NM_207007, NM_181652, NM_004633, NM_004267, NM_005474, NM_173842, NM_002468, NM_002029, NM_004107, NM_153292, NM_001005611, NM_013416, NM_006263, NM_016219, NM_005516, NM_005267, NM_013230, NM_001002235, NM_002964, NM_003900, NM_002800, NM_005252, NM_000200, NM_000312, NM_152879, NM_000433, NM_020529, NM_002983, NM_005194, NM_003790, NM_003824, NM_003641, NM_002965, XM_084845, NM_005745, NM_194447, NM_003332, NM_000211, NM_016389, NM_005849, NM_001085, NM_002341, NM_000576, NM_020530, NM_018643, NM_001557, NM_000584, |
| GOTERM_BP_ALL | response to chemical stimulus                               | 23 | NM_002029, NM_006597, NM_001007553, NM_000581, NM_201397, NM_001005377, NM_003169, NM_001511, NM_000211, NM_007355, NM_016190, NM_000636, NM_001024466, NM_000200, NM_152879, NM_006096, NM_002983, NM_005345, NM_002524, NM_006788, NM_002984, NM_207007, NM_000160, NM_181652, NM_001557, NM_000584,                                                                                                                                                                                                                                                                                                                                                                                                                                                 |

|               |                                        |    |                                                                                                                                                                                                                                                                                                                                                                                                                                                                                                                                                                                                                                                                                                                                                                      |
|---------------|----------------------------------------|----|----------------------------------------------------------------------------------------------------------------------------------------------------------------------------------------------------------------------------------------------------------------------------------------------------------------------------------------------------------------------------------------------------------------------------------------------------------------------------------------------------------------------------------------------------------------------------------------------------------------------------------------------------------------------------------------------------------------------------------------------------------------------|
| GOTERM_BP_ALL | response to external stimulus          | 34 | NM_002432, NM_000700, NM_001005377, NM_001511, NM_005252, NM_000636, NM_001024466, NM_000628, NM_000312, NM_000433, NM_002983, NM_020956, NM_001623, NM_004847, NM_006788, NM_005194, NM_002984, NM_207007, NM_181652, NM_004267, NM_173842, NM_005474, NM_002468, NM_002029, NM_002965, NM_021200, NM_153292, NM_003332, NM_000211, NM_000843, NM_001085, NM_000576, NM_002524, NM_000160, NM_001557, NM_000584, NM_002964,                                                                                                                                                                                                                                                                                                                                         |
| GOTERM_BP_ALL | response to other organism             | 35 | NM_002432, NM_000700, NM_004559, NM_001511, NM_005252, NM_000636, NM_001024466, NM_000200, NM_000628, NM_000433, NM_020529, NM_002983, NM_001623, NM_004847, NM_005194, NM_002984, NM_207007, NM_181652, NM_004267, NM_005474, NM_173842, NM_002468, NM_003824, NM_002029, NM_002965, NM_153292, NM_194447, NM_003332, NM_000211, NM_016389, NM_001085, NM_000576, NM_018643, NM_013230, NM_001002235, NM_001557, NM_000584, NM_002964,                                                                                                                                                                                                                                                                                                                              |
| GOTERM_BP_ALL | response to pest, pathogen or parasite | 34 | NM_002432, NM_000700, NM_004559, NM_001511, NM_005252, NM_000636, NM_001024466, NM_000628, NM_000433, NM_020529, NM_002983, NM_001623, NM_004847, NM_005194, NM_002984, NM_207007, NM_181652, NM_004267, NM_005474, NM_173842, NM_002468, NM_003824, NM_002029, NM_002965, NM_153292, NM_194447, NM_003332, NM_000211, NM_016389, NM_001085, NM_000576, NM_018643, NM_013230, NM_001002235, NM_001557, NM_000584, NM_002964,                                                                                                                                                                                                                                                                                                                                         |
| GOTERM_BP_ALL | response to stress                     | 62 | NM_002432, NM_000700, NM_001007553, NM_004559, NM_173176, NM_001511, NM_016190, NM_032409, NM_000636, NM_001024466, NM_000628, NM_001623, NM_004847, NM_002984, NM_207007, NM_181652, NM_004267, NM_005484, NM_005474, NM_173842, NM_002468, NM_002029, NM_002969, NM_006597, NM_153292, NM_013233, NM_013230, NM_001002235, NM_006763, NM_002964, NM_003900, NM_006384, NM_001641, NM_139062, NM_001005377, NM_018282, NM_001015052, NM_005252, NM_005801, NM_000312, NM_000433, NM_020529, NM_002983, NM_005194, NM_014445, NM_005923, NM_012235, NM_003824, NM_015675, NM_001675, NM_002965, NM_000581, NM_201397, NM_194447, NM_003332, NM_000211, NM_007355, NM_016389, NM_001085, NM_005345, NM_001280, NM_000576, NM_018643, NM_002691, NM_001557, NM_000584, |

|               |                                          |    |                                                                                                                                                                                                                                                                                                                                                                                                                                                                                                                                                                                                                                                                                                                                                                                                                                                                                                                                                                                                                                                                                                                      |
|---------------|------------------------------------------|----|----------------------------------------------------------------------------------------------------------------------------------------------------------------------------------------------------------------------------------------------------------------------------------------------------------------------------------------------------------------------------------------------------------------------------------------------------------------------------------------------------------------------------------------------------------------------------------------------------------------------------------------------------------------------------------------------------------------------------------------------------------------------------------------------------------------------------------------------------------------------------------------------------------------------------------------------------------------------------------------------------------------------------------------------------------------------------------------------------------------------|
| GOTERM_BP_ALL | response to wounding                     | 28 | NM_002432, NM_000700, NM_001005377, NM_001511, NM_005252, NM_000636, NM_001024466, NM_000628, NM_000312, NM_000433, NM_002983, NM_001623, NM_004847, NM_005194, NM_002984, NM_207007, NM_181652, NM_004267, NM_005474, NM_173842, NM_002468, NM_002029, NM_002965, NM_153292, NM_003332, NM_000211, NM_001085, NM_000576, NM_001557, NM_000584, NM_002964,                                                                                                                                                                                                                                                                                                                                                                                                                                                                                                                                                                                                                                                                                                                                                           |
| GOTERM_BP_ALL | Rho protein signal transduction          | 6  | NM_005507, NM_001664, NM_002314, NM_198829, NM_001665, NM_001175,                                                                                                                                                                                                                                                                                                                                                                                                                                                                                                                                                                                                                                                                                                                                                                                                                                                                                                                                                                                                                                                    |
| GOTERM_CC_ALL | ribonucleoprotein complex                | 94 | XM_371853, NM_031844, NM_014469, NM_001014, NM_001023, NM_001000, NM_001004, XM_927103, NM_001012321, NM_001007, NM_000999, NM_015414, NM_001028, NM_001025071, NM_005617, NM_001033853, NM_000970, NM_001024662, NM_000972, NM_003908, XM_371023, NM_201998, NM_170738, NM_014180, NM_000973, NM_000985, XM_372048, NM_001006, NM_001032, NM_001026, XM_208185, NM_001997, XM_371019, NM_033251, NM_022551, NM_000978, NM_003333, NM_000975, NM_000989, NM_022118, NM_001011, NM_001031, NM_007104, NM_001001, NM_002136, NM_000981, NM_001012, NM_000986, XM_496442, NM_002954, NM_001025204, NM_000980, NM_001641, NM_001436, NM_002948, NM_005968, NM_000992, NM_000983, XM_495839, NM_000661, NM_001035267, NM_001024, NM_000998, NM_000969, XM_015717, NM_001030009, NM_014445, NM_000968, XM_293412, NM_000988, NM_001002, NM_000971, NM_033625, NM_001022, NM_012423, NM_003973, NM_000984, NM_001017, NM_000990, NM_002952, NM_021029, NM_001020, NM_001009, XM_370611, NM_000994, NM_016389, NM_001005, NM_194247, NM_003091, NM_000996, NM_001015, NM_016732, NM_031266, NM_006013, NM_001025, NM_000976, |
| GOTERM_BP_ALL | ribonucleoside triphosphate biosynthesis | 13 | NM_007100, NM_006476, NM_006356, NM_001002031, NM_001686, NM_001693, NM_001694, NM_001001937, NM_002512, NM_001685, NM_003987, NM_001001977, NM_001002258,                                                                                                                                                                                                                                                                                                                                                                                                                                                                                                                                                                                                                                                                                                                                                                                                                                                                                                                                                           |
| GOTERM_BP_ALL | ribonucleoside triphosphate metabolism   | 13 | NM_007100, NM_006476, NM_006356, NM_001002031, NM_001686, NM_001693, NM_001694, NM_001001937, NM_002512, NM_001685, NM_003987, NM_001001977, NM_001002258,                                                                                                                                                                                                                                                                                                                                                                                                                                                                                                                                                                                                                                                                                                                                                                                                                                                                                                                                                           |
| GOTERM_BP_ALL | ribonucleotide biosynthesis              | 14 | NM_007100, NM_006476, NM_006356, NM_001002031, NM_001686, NM_001693, NM_001694, NM_001001937, NM_002512, NM_001685, NM_001001977, NM_003987, NM_001002258, NM_012393,                                                                                                                                                                                                                                                                                                                                                                                                                                                                                                                                                                                                                                                                                                                                                                                                                                                                                                                                                |
| GOTERM_BP_ALL | ribonucleotide metabolism                | 14 | NM_007100, NM_006476, NM_006356, NM_001002031, NM_001686, NM_001693, NM_001694, NM_001001937, NM_002512, NM_001685, NM_001001977, NM_003987, NM_001002258, NM_012393,                                                                                                                                                                                                                                                                                                                                                                                                                                                                                                                                                                                                                                                                                                                                                                                                                                                                                                                                                |

|               |                                                 |    |                                                                                                                                                                                                                                                                                                                                                                                                                                                                                                                                                                                                                                                                                                                                                                                                                                                                                                                                                                                      |
|---------------|-------------------------------------------------|----|--------------------------------------------------------------------------------------------------------------------------------------------------------------------------------------------------------------------------------------------------------------------------------------------------------------------------------------------------------------------------------------------------------------------------------------------------------------------------------------------------------------------------------------------------------------------------------------------------------------------------------------------------------------------------------------------------------------------------------------------------------------------------------------------------------------------------------------------------------------------------------------------------------------------------------------------------------------------------------------|
| GOTERM_CC_ALL | ribosome                                        | 82 | <p>XM_371853, NM_001014, NM_001023, NM_001000, NM_001004, XM_927103, NM_001012321, NM_001007, NM_000999, NM_015414, NM_001028, NM_001025071, NM_005617, NM_001033853, NM_000970, NM_001024662, NM_000972, NM_003908, XM_371023, NM_201998, NM_170738, NM_014180, NM_000973, NM_000985, XM_372048, NM_001006, NM_001032, XM_208185, NM_001026, NM_001997, XM_371019, NM_033251, NM_022551, NM_000978, NM_003333, NM_000975, NM_000989, NM_001011, NM_001031, NM_007104, NM_001001, NM_000981, NM_001012, NM_000986, XM_496442, NM_002954, NM_000980, NM_001641, NM_002948, NM_000992, NM_000983, XM_495839, NM_000661, NM_001035267, NM_001024, NM_000998, NM_000969, XM_015717, NM_001030009, NM_014445, NM_000968, XM_293412, NM_000988, NM_001002, NM_000971, NM_033625, NM_001022, NM_012423, NM_003973, NM_000984, NM_001017, NM_000990, NM_002952, NM_001020, NM_021029, NM_001009, XM_370611, NM_000994, NM_001005, NM_000996, NM_001015, NM_006013, NM_001025, NM_000976,</p> |
| GOTERM_MF_ALL | RNA binding                                     | 68 | <p>NM_013286, NM_001010850, NM_031844, NM_001014, NM_006489, NM_001007553, NM_004559, NM_003487, NM_001004, NM_001007, NM_005131, NM_002568, NM_000970, NM_001024662, NM_001033853, NM_003908, NM_201998, NM_000973, NM_000985, NM_033251, XM_371019, NM_022551, NM_001357, NM_003333, NM_006397, NM_014884, NM_000975, NM_003407, NM_005381, NM_002136, NM_000981, NM_001025204, NM_001039465, NM_000980, NM_017722, NM_001436, NM_005968, NM_024045, NM_000992, NM_000983, NM_000661, NM_002486, NM_004643, NM_000969, NM_013293, NM_000968, NM_001002, NM_000971, NM_033625, NM_001022, NM_003973, NM_030979, NM_000984, NM_000990, NM_002952, NM_001009, NM_019001, NM_001402, NM_001005, NM_004593, NM_194247, NM_003091, NM_001280, NM_000996, NM_001015, NM_016732, NM_031266, NM_000976, NM_001967,</p>                                                                                                                                                                      |
| GOTERM_BP_ALL | RNA metabolism                                  | 27 | <p>NM_031844, NM_001039465, NM_006489, NM_017722, NM_001436, NM_018282, NM_005131, NM_018694, NM_002568, NM_004643, NM_002486, NM_201998, NM_013293, NM_025150, NM_030979, NM_006397, NM_014884, NM_016389, NM_004593, NM_003407, NM_005345, NM_003091, NM_002136, NM_030919, NM_031266, NM_001007229, NM_001025204,</p>                                                                                                                                                                                                                                                                                                                                                                                                                                                                                                                                                                                                                                                             |
| GOTERM_MF_ALL | RNA polymerase II transcription factor activity | 13 | <p>NM_001675, NM_001037637, NM_002229, NM_014213, NM_001452, NM_003487, NM_021005, NM_138714, NM_005252, NM_005121, NM_201998, NM_015859, NM_012482,</p>                                                                                                                                                                                                                                                                                                                                                                                                                                                                                                                                                                                                                                                                                                                                                                                                                             |

|               |                                                                                      |    |                                                                                                                                                                                                                                                   |
|---------------|--------------------------------------------------------------------------------------|----|---------------------------------------------------------------------------------------------------------------------------------------------------------------------------------------------------------------------------------------------------|
| GOTERM_BP_ALL | RNA processing                                                                       | 20 | NM_001039465, NM_031844, NM_006489, NM_017722, NM_001436, NM_018282, NM_005131, NM_018694, NM_016389, NM_014884, NM_004593, NM_002568, NM_003091, NM_002486, NM_004643, NM_201998, NM_013293, NM_002136, NM_001007229, NM_001025204,              |
| GOTERM_BP_ALL | RNA splicing                                                                         | 13 | NM_001039465, NM_006489, NM_018282, NM_005131, NM_018694, NM_014884, NM_016389, NM_004593, NM_003091, NM_002486, NM_201998, NM_013293, NM_001025204,                                                                                              |
| GOTERM_BP_ALL | RNA splicing, via transesterification reactions                                      | 9  | NM_014884, NM_004593, NM_001039465, NM_003091, NM_018282, NM_201998, NM_013293, NM_005131, NM_001025204,                                                                                                                                          |
| GOTERM_BP_ALL | RNA splicing, via transesterification reactions with bulged adenosine as nucleophile | 9  | NM_014884, NM_004593, NM_001039465, NM_003091, NM_018282, NM_201998, NM_013293, NM_005131, NM_001025204,                                                                                                                                          |
| GOTERM_MF_ALL | rRNA binding                                                                         | 6  | NM_000975, NM_000984, NM_000969, NM_022551, NM_001015, NM_000973, NM_002029, NM_152879, NM_032246, NM_199040, NM_000160, NM_001557,                                                                                                               |
| GOTERM_BP_ALL | second-messenger-mediated signaling                                                  | 10 | NM_000584, NM_006098, NM_001114, NM_201533, NM_002983, NM_001009181, NM_001024226, NM_001014797, NM_003569, NM_004781, NM_198398, NM_022080, NM_005745, NM_003761, NM_014723, NM_001662,                                                          |
| GOTERM_BP_ALL | secretion                                                                            | 12 | NM_002983, NM_001024226, NM_001014797, NM_003569, NM_004781, NM_198398, NM_022080, NM_005745, NM_003761, NM_014723, NM_001662,                                                                                                                    |
| GOTERM_BP_ALL | secretory pathway                                                                    | 11 | NM_002983, NM_001024226, NM_001014797, NM_003569, NM_004781, NM_198398, NM_022080, NM_005745, NM_003761, NM_014723, NM_001662,                                                                                                                    |
| GOTERM_MF_ALL | sequence-specific DNA binding                                                        | 22 | NM_002229, NM_001675, NM_014213, NM_023067, NM_001452, NM_002146, NM_017420, NM_005413, NM_005938, NM_000044, NM_021005, NM_005252, NM_001426, NM_002585, NM_007317, NM_005194, NM_003927, NM_002971, NM_033267, NM_024016, NM_022117, NM_018942, |
| GOTERM_MF_ALL | serine-type endopeptidase inhibitor activity                                         | 8  | NM_003064, NM_030666, NM_201413, NM_001085, NM_181642, NM_002567, NM_002638, NM_001002235,                                                                                                                                                        |
| GOTERM_BP_ALL | small GTPase mediated signal transduction                                            | 19 | NM_005507, NM_021205, NM_198829, NM_001024226, NM_001175, NM_001662, NM_002314, NM_001664, NM_001031677, NM_006270, NM_002524, NM_138769, NM_021033, NM_001665, NM_021168, NM_002872, NM_003624, NM_183235, NM_006822,                            |
| GOTERM_CC_ALL | small ribosomal subunit                                                              | 10 | XM_372048, NM_001005, NM_001014, NM_001022, NM_001023, NM_002952, NM_001012321, NM_001025, NM_001009, XM_496442,                                                                                                                                  |
| GOTERM_MF_ALL | sodium ion transporter activity                                                      | 5  | NM_002491, NM_021074, NM_004549, NM_002489, NM_004541,                                                                                                                                                                                            |
| GOTERM_CC_ALL | spliceosome complex                                                                  | 5  | NM_016389, NM_003091, NM_022118, NM_201998, NM_001025204,                                                                                                                                                                                         |
| GOTERM_BP_ALL | stress-activated protein kinase signaling pathway                                    | 5  | NM_033141, NM_212492, NM_005923, NM_015133, NM_005456,                                                                                                                                                                                            |
| GOTERM_BP_ALL | striated muscle development                                                          | 5  | NM_002969, NM_012238, NM_021019, NM_079423, NM_003333, NM_005474,                                                                                                                                                                                 |



|               |                                        |     |                                                                                                                                                                                                                                                                                                                                                                                                                                                                                                                                                                                                                                                                                                                                                                                                                                                                                                                                                                                                                                                                                                                                                                                                                                                                                                   |
|---------------|----------------------------------------|-----|---------------------------------------------------------------------------------------------------------------------------------------------------------------------------------------------------------------------------------------------------------------------------------------------------------------------------------------------------------------------------------------------------------------------------------------------------------------------------------------------------------------------------------------------------------------------------------------------------------------------------------------------------------------------------------------------------------------------------------------------------------------------------------------------------------------------------------------------------------------------------------------------------------------------------------------------------------------------------------------------------------------------------------------------------------------------------------------------------------------------------------------------------------------------------------------------------------------------------------------------------------------------------------------------------|
| GOTERM_MF_ALL | structural constituent of cytoskeleton | 15  | NM_005554, NM_000424, NM_002272, NM_199187, NM_000526, NM_002705, NM_000226, NM_005720, NM_001101, NM_001614, NM_005555, NM_005731, NM_152862, NM_004389, NM_004924, NM_002274, NM_153490, NM_002276, NM_003458,                                                                                                                                                                                                                                                                                                                                                                                                                                                                                                                                                                                                                                                                                                                                                                                                                                                                                                                                                                                                                                                                                  |
| GOTERM_MF_ALL | structural constituent of ribosome     | 78  | XM_371853, NM_001014, NM_001023, NM_001000, NM_001004, XM_927103, NM_001012321, NM_001007, NM_000999, NM_015414, NM_002953, NM_001025071, NM_005617, NM_001033853, NM_000970, NM_001024662, NM_000972, XM_371023, NM_170738, NM_014180, NM_000973, NM_000985, XM_372048, NM_001006, NM_001032, XM_208185, NM_001026, NM_001997, XM_371019, NM_033251, NM_022551, NM_000978, NM_003333, NM_000975, NM_000989, NM_001011, NM_001031, NM_007104, NM_001001, NM_000981, NM_001012, NM_000986, XM_496442, NM_002954, NM_000980, NM_002948, NM_000992, NM_000983, XM_495839, NM_000661, NM_001035267, NM_001024, NM_000998, NM_000969, XM_015717, NM_001030009, NM_000968, XM_293412, NM_000988, NM_001002, NM_000971, NM_033625, NM_001022, NM_012423, NM_003973, NM_000984, NM_001017, NM_000990, NM_002952, NM_001020, NM_021029, NM_001009, XM_370611, NM_000994, NM_001005, NM_000996, NM_001015, NM_006013, NM_001025, NM_000976,                                                                                                                                                                                                                                                                                                                                                                 |
| GOTERM_MF_ALL | structural molecule activity           | 120 | XM_371853, NM_001023, XM_927103, NM_000999, NM_001025071, NM_005617, NM_002953, NM_000972, NM_005988, NM_170738, NM_001006, XM_372048, NM_000424, NM_002272, NM_000985, NM_199187, NM_001032, NM_001026, NM_001997, XM_371019, NM_152888, NM_000978, NM_000975, NM_002284, NM_000989, NM_004693, NM_007104, NM_000981, NM_001012, NM_005721, NM_005416, NM_002954, NM_000526, NM_003125, NM_000226, NM_005720, NM_001101, NM_001614, NM_002948, NM_000983, NM_057088, NM_006617, NM_000998, NM_002274, NM_153490, NM_000969, XM_015717, NM_002276, NM_001853, NM_006009, XM_293412, NM_000988, NM_001002, NM_000971, NM_033625, NM_001022, NM_000984, NM_001017, NM_001017418, NM_006945, NM_002952, NM_021029, NM_001009, NM_000994, XM_370611, NM_001005, NM_173086, NM_006088, NM_000996, NM_001015, NM_001025, NM_000976, NM_001014, NM_006082, NM_001000, NM_021046, NM_000421, NM_005555, NM_001004, NM_001012321, NM_001007, NM_015414, NM_003247, NM_000970, NM_001024662, NM_005987, NM_001033853, XM_371023, NM_014180, NM_000973, NM_005554, XM_208185, NM_033251, NM_022551, NM_003333, NM_005731, NM_152862, NM_173352, NM_004389, NM_001011, NM_001031, NM_001001, XM_496442, NM_000986, NM_207303, NM_000980, NM_006181, NM_000992, XM_495839, NM_000661, NM_001035267, NM_001024, |

|               |                                                   |    |                                                                                                                                                                                                                                                                                                                   |
|---------------|---------------------------------------------------|----|-------------------------------------------------------------------------------------------------------------------------------------------------------------------------------------------------------------------------------------------------------------------------------------------------------------------|
| GOTERM_BP_ALL | system development                                | 27 | NM_007308, NM_032108, NM_005634, NM_014279, NM_003108, NM_006181, NM_001511, NM_000044, NM_206887, NM_205840, NM_057091, NM_002585, NM_006617, NM_020956, NM_003025, NM_003656, NM_014548, NM_003987, NM_004114, NM_005413, NM_023035, NM_000263, NM_021999, NM_003333, NM_021074, NM_002314, NM_014496,          |
| GOTERM_BP_ALL | taxis                                             | 10 | NM_002029, NM_002983, NM_002524, NM_006788, NM_001005377, NM_002984, NM_207007, NM_001511, NM_001557, NM_000584, NM_000211,                                                                                                                                                                                       |
| GOTERM_BP_ALL | tissue development                                | 19 | NM_005554, NM_000526, NM_000424, NM_002272, NM_003125, NM_004475, NM_002705, NM_000226, NM_001009181, NM_001005611, NM_000421, NM_005555, NM_001017418, NM_006945, NM_003245, NM_002959, NM_000200, NM_002274, NM_153490, NM_005987, NM_005988, NM_005416,                                                        |
| GOTERM_BP_ALL | tissue morphogenesis                              | 7  | NM_003125, NM_002705, NM_005987, NM_005988, NM_001017418, NM_006945, NM_003245, NM_005416,                                                                                                                                                                                                                        |
| GOTERM_MF_ALL | transcription cofactor activity                   | 12 | NM_002229, NM_002357, NM_001641, NM_005121, NM_001452, NM_014517, NM_015859, NM_201998, NM_005437, NM_021005, NM_006312, NM_145897,                                                                                                                                                                               |
| GOTERM_MF_ALL | transcription corepressor activity                | 8  | NM_002229, NM_002357, NM_001641, NM_014517, NM_201998, NM_021005, NM_006312, NM_145897,                                                                                                                                                                                                                           |
| GOTERM_MF_ALL | transcription factor binding                      | 14 | NM_002229, NM_001641, NM_001452, NM_014517, NM_021005, NM_002357, NM_020529, NM_005121, NM_201998, NM_015859, NM_005437, NM_006312, NM_145897, NM_005474,                                                                                                                                                         |
| GOTERM_CC_ALL | transcription factor complex                      | 7  | NM_016389, NM_001452, NM_003487, NM_001101, NM_001614, NM_015859, NM_018171, NM_005474,                                                                                                                                                                                                                           |
| GOTERM_BP_ALL | transcription from RNA polymerase II promoter     | 26 | NM_003900, NM_001037637, NM_002229, NM_001641, NM_020183, NM_001452, NM_005206, NM_004559, NM_001005273, NM_021005, NM_138714, NM_005252, NM_000636, NM_001024466, NM_002585, NM_005121, NM_005194, NM_003987, NM_001675, NM_014517, NM_001261, NM_005938, NM_003169, NM_001271, NM_015859, NM_012482, NM_212472, |
| GOTERM_BP_ALL | translation                                       | 17 | NM_001004, NM_001037663, NM_001012321, NM_024996, NM_001404, NM_005801, NM_001402, XM_058967, NM_013234, NM_152269, NM_002568, NM_003753, NM_003908, NM_030919, NM_001967, NM_025150, NM_001002,                                                                                                                  |
| GOTERM_MF_ALL | translation elongation factor activity            | 6  | XM_058967, NM_001037663, NM_172027, NM_024996, NM_001404, NM_001402, NM_001037663, NM_018429, NM_024996, NM_001404, NM_005801, NM_001402,                                                                                                                                                                         |
| GOTERM_MF_ALL | translation factor activity, nucleic acid binding | 15 | XM_058967, NM_013234, NM_152269, NM_002568, NM_003753, NM_003908, NM_172027, NM_001967, NM_017629,                                                                                                                                                                                                                |

|               |                                        |     |                                                                                                                                                                                                                                                                                                                                                                                                                                                                                                                                                                                                                                                                                                                                                                                                                                                                                                                                                                                                                                                                                                                                                                                                                                                                                              |
|---------------|----------------------------------------|-----|----------------------------------------------------------------------------------------------------------------------------------------------------------------------------------------------------------------------------------------------------------------------------------------------------------------------------------------------------------------------------------------------------------------------------------------------------------------------------------------------------------------------------------------------------------------------------------------------------------------------------------------------------------------------------------------------------------------------------------------------------------------------------------------------------------------------------------------------------------------------------------------------------------------------------------------------------------------------------------------------------------------------------------------------------------------------------------------------------------------------------------------------------------------------------------------------------------------------------------------------------------------------------------------------|
| GOTERM_MF_ALL | translation initiation factor activity | 7   | NM_013234, NM_003753, NM_003908, NM_018429, NM_001967, NM_005801, NM_017629,                                                                                                                                                                                                                                                                                                                                                                                                                                                                                                                                                                                                                                                                                                                                                                                                                                                                                                                                                                                                                                                                                                                                                                                                                 |
| GOTERM_MF_ALL | translation regulator activity         | 15  | NM_001037663, NM_018429, NM_024996, NM_001404, NM_005801, NM_001402, XM_058967, NM_013234, NM_152269, NM_002568, NM_003753, NM_003908, NM_172027, NM_001967, NM_017629,                                                                                                                                                                                                                                                                                                                                                                                                                                                                                                                                                                                                                                                                                                                                                                                                                                                                                                                                                                                                                                                                                                                      |
| GOTERM_BP_ALL | translational elongation               | 7   | XM_058967, NM_001004, NM_001037663, NM_024996, NM_001404, NM_001402, NM_001002,                                                                                                                                                                                                                                                                                                                                                                                                                                                                                                                                                                                                                                                                                                                                                                                                                                                                                                                                                                                                                                                                                                                                                                                                              |
| GOTERM_BP_ALL | translational initiation               | 5   | NM_013234, NM_003753, NM_003908, NM_001967, NM_005801,                                                                                                                                                                                                                                                                                                                                                                                                                                                                                                                                                                                                                                                                                                                                                                                                                                                                                                                                                                                                                                                                                                                                                                                                                                       |
| GOTERM_BP_ALL | transport                              | 135 | NM_052452, NM_178528, NM_022822, NM_000470, NM_000044, NM_005487, NM_005131, NM_152313, NM_002491, NM_002032, NM_201413, NM_001694, NM_002556, NM_006788, NM_007317, NM_005072, NM_025150, NM_207127, NM_007100, NM_001636, NM_013416, NM_199040, NM_145283, NM_152888, NM_152868, NM_138813, NM_000978, NM_004519, NM_000288, NM_001288, NM_001001937, NM_003329, NM_002136, NM_005858, NM_004227, NM_015133, NM_014453, NM_033323, NM_001014797, NM_033223, NM_001002031, NM_004781, NM_178867, NM_017657, NM_001693, NM_001662, NM_019849, NM_000786, NM_020529, NM_002486, NM_006305, NM_001685, NM_001853, NM_006009, NM_020548, NM_213601, NM_007347, NM_023035, NM_005745, NM_006088, NM_003777, NM_031431, NM_001002258, NM_183235, NM_006822, NM_005456, NM_006082, NM_198829, NM_001024226, NM_004255, NM_198398, NM_001686, NM_001863, NM_052859, NM_001031677, NM_005817, NM_001017998, NM_176812, NM_000146, NM_004366, NM_153292, NM_001005611, NM_018593, NM_006356, NM_181836, NM_014402, NM_000918, NM_002635, NM_004976, NM_021074, NM_016226, NM_001664, NM_000238, NM_005267, NM_001494, NM_025072, NM_031212, NM_021168, NM_003624, NM_003761, NM_030777, NM_016518, NM_003900, NM_014861, NM_004549, NM_004074, NM_005932, NM_000018, NM_003003, NM_145648, NM_006294, |

|               |                                    |    |                                                                                                                                                                                                                                                                                                                                                                                                                                                                                                                                                                                                                                                                                                                                                                                                                                                                         |
|---------------|------------------------------------|----|-------------------------------------------------------------------------------------------------------------------------------------------------------------------------------------------------------------------------------------------------------------------------------------------------------------------------------------------------------------------------------------------------------------------------------------------------------------------------------------------------------------------------------------------------------------------------------------------------------------------------------------------------------------------------------------------------------------------------------------------------------------------------------------------------------------------------------------------------------------------------|
| GOTERM_MF_ALL | transporter activity               | 75 | NM_006476, NM_004255, NM_001686, NM_001863, NM_052859, NM_005576, NM_152313, NM_002491, NM_001694, NM_005072, NM_181652, NM_025150, NM_004366, NM_007100, NM_153292, NM_001636, NM_013416, NM_018593, NM_145283, NM_006356, NM_000918, NM_152868, NM_014402, NM_002635, NM_138813, NM_004976, NM_004519, NM_021074, NM_001288, NM_000238, NM_005267, NM_002489, NM_001001937, NM_025072, NM_003329, NM_005858, NM_030777, NM_004074, NM_014861, NM_004549, NM_003003, NM_145648, NM_006294, NM_033323, NM_001002031, NM_001014797, NM_033223, NM_001646, NM_022080, NM_178867, NM_001693, NM_021960, NM_001865, NM_019849, NM_000433, NM_001685, NM_001001977, NM_000702, NM_138454, NM_004374, NM_023035, NM_000352, NM_003569, NM_002959, NM_001426, NM_004174, NM_032591, NM_016321, NM_005714, NM_004541, NM_015353, NM_000126, NM_032513, NM_004069, NM_001002258, |
| GOTERM_MF_ALL | unfolded protein binding           | 13 | NM_004323, NM_006597, NM_004607, NM_005347, NM_145046, NM_007355, NM_003021, NM_005345, NM_021130, NM_001017998, NM_006088, NM_145897, NM_012235,                                                                                                                                                                                                                                                                                                                                                                                                                                                                                                                                                                                                                                                                                                                       |
| GOTERM_BP_ALL | vasculature development            | 5  | NM_006291, NM_031917, NM_014780, NM_000584, NM_005560,                                                                                                                                                                                                                                                                                                                                                                                                                                                                                                                                                                                                                                                                                                                                                                                                                  |
| GOTERM_BP_ALL | vesicle-mediated transport         | 22 | NM_003900, NM_032452, NM_198829, NM_001024226, NM_007347, NM_004781, NM_003569, NM_198398, NM_005487, NM_022080, NM_005745, NM_014723, NM_001662, NM_002959, NM_201413, NM_002983, NM_005817, NM_004069, NM_004227, NM_003761, NM_015133, NM_005456,                                                                                                                                                                                                                                                                                                                                                                                                                                                                                                                                                                                                                    |
| GOTERM_BP_ALL | viral genome replication           | 7  | NM_006058, NM_002983, NM_021130, NM_014517, NM_002984, NM_207007, NM_003169, NM_000584,                                                                                                                                                                                                                                                                                                                                                                                                                                                                                                                                                                                                                                                                                                                                                                                 |
| GOTERM_BP_ALL | viral infectious cycle             | 7  | NM_006058, NM_002983, NM_021130, NM_014517, NM_002984, NM_207007, NM_003169, NM_000584,                                                                                                                                                                                                                                                                                                                                                                                                                                                                                                                                                                                                                                                                                                                                                                                 |
| GOTERM_BP_ALL | viral life cycle                   | 7  | NM_006058, NM_002983, NM_021130, NM_014517, NM_002984, NM_207007, NM_003169, NM_000584,                                                                                                                                                                                                                                                                                                                                                                                                                                                                                                                                                                                                                                                                                                                                                                                 |
| GOTERM_MF_ALL | voltage-gated ion channel activity | 11 | NM_001288, NM_000238, NM_005714, NM_015353, NM_023035, NM_001014797, NM_152868, NM_004976, NM_004519, NM_001426, NM_004366,                                                                                                                                                                                                                                                                                                                                                                                                                                                                                                                                                                                                                                                                                                                                             |
